# Supplementary material for: Evolutionary dynamics of circular RNAs in primates
Source: eLife journal article supplement (doi:10.7554/elife.69148), 2021-09-20

A)

Brain

p-value = 0.965

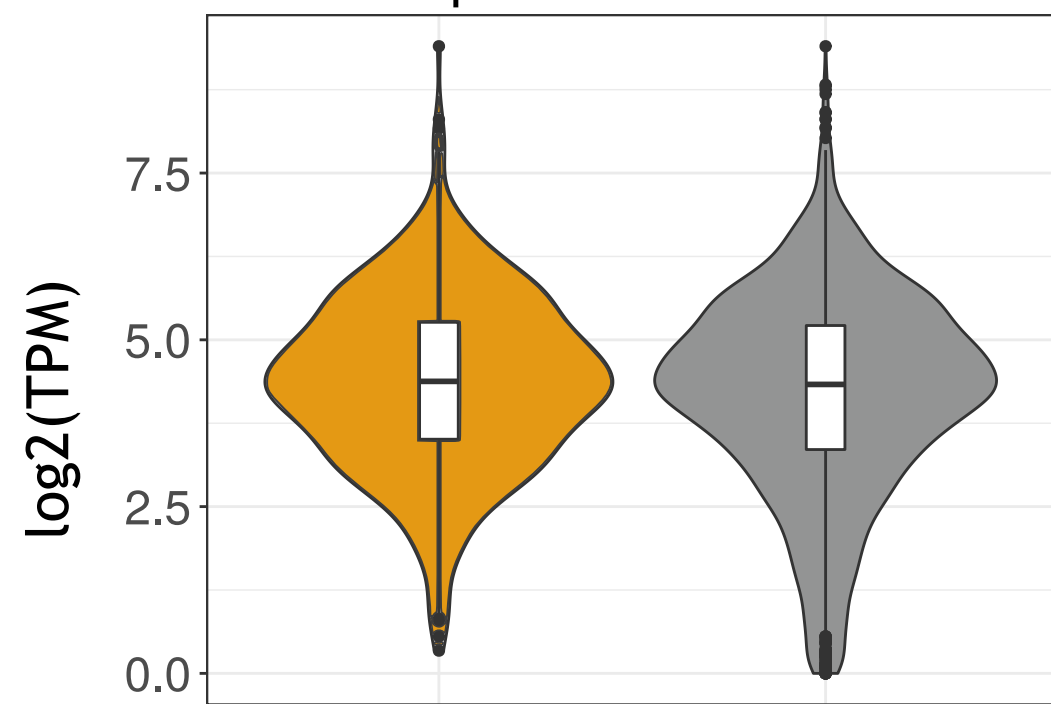

Cerebellum

p-value = 0.002

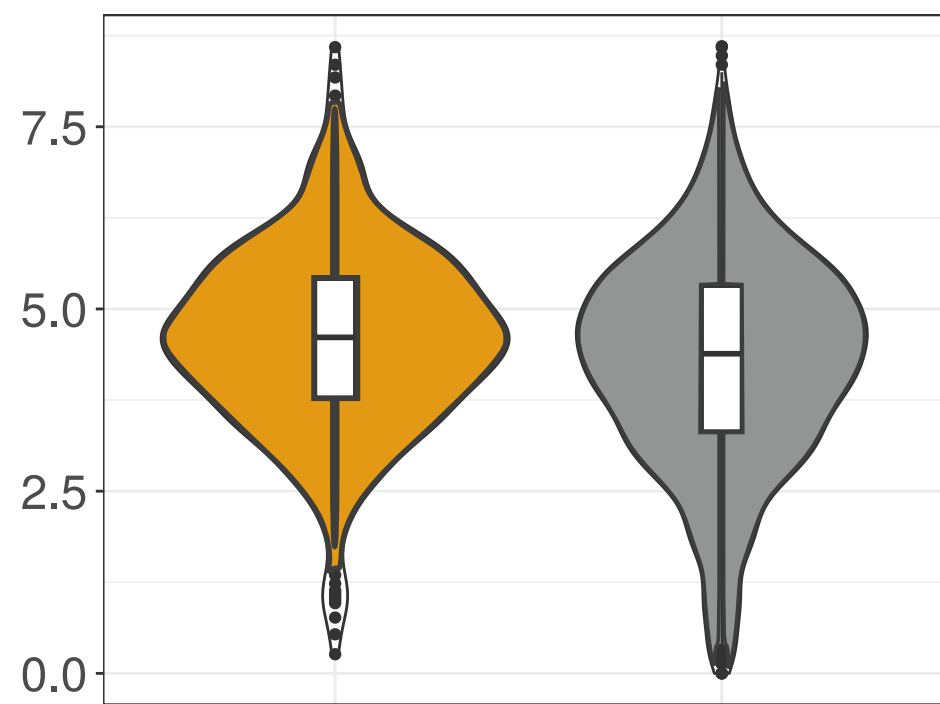

Frontal Cortex

p-value = 0.004

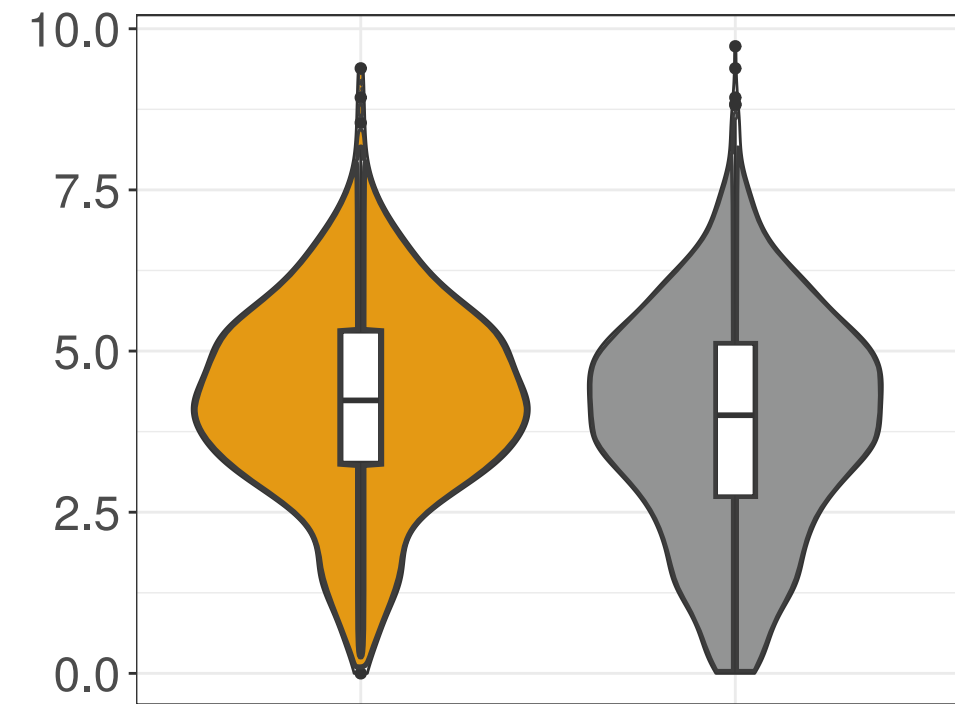

Colon

p-value = 1

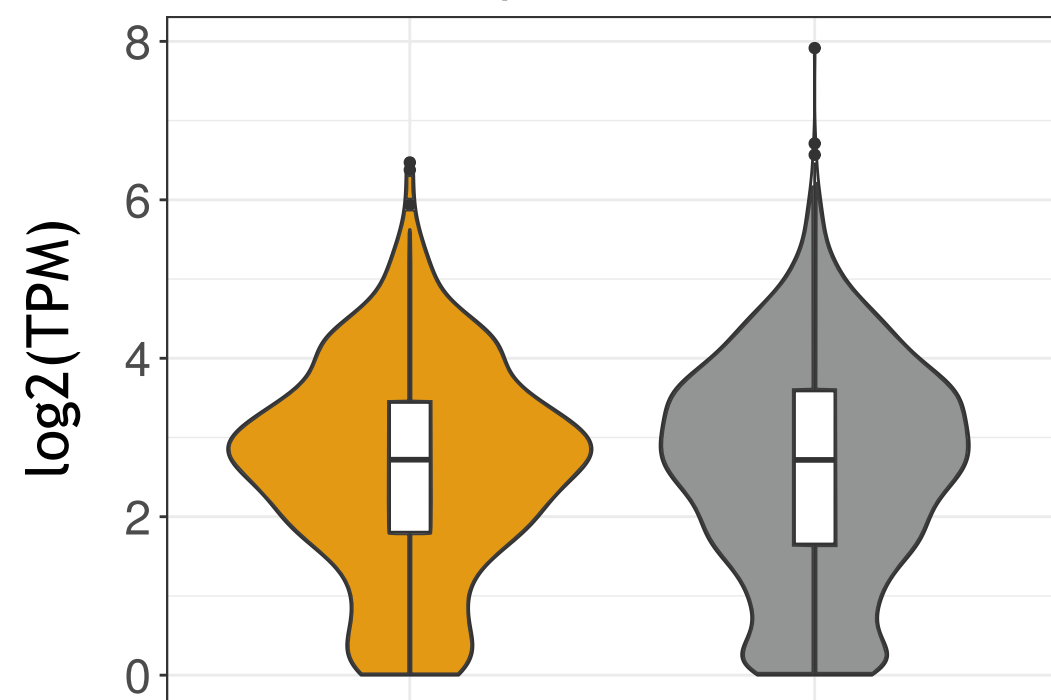

Liver

p-value = 1

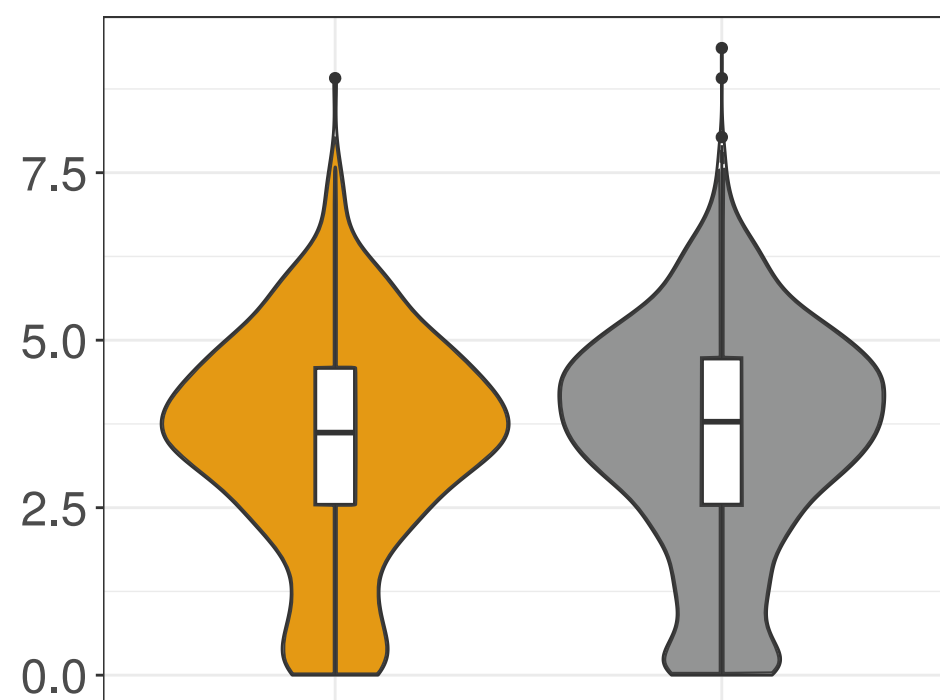

Spleen

p-value = 1

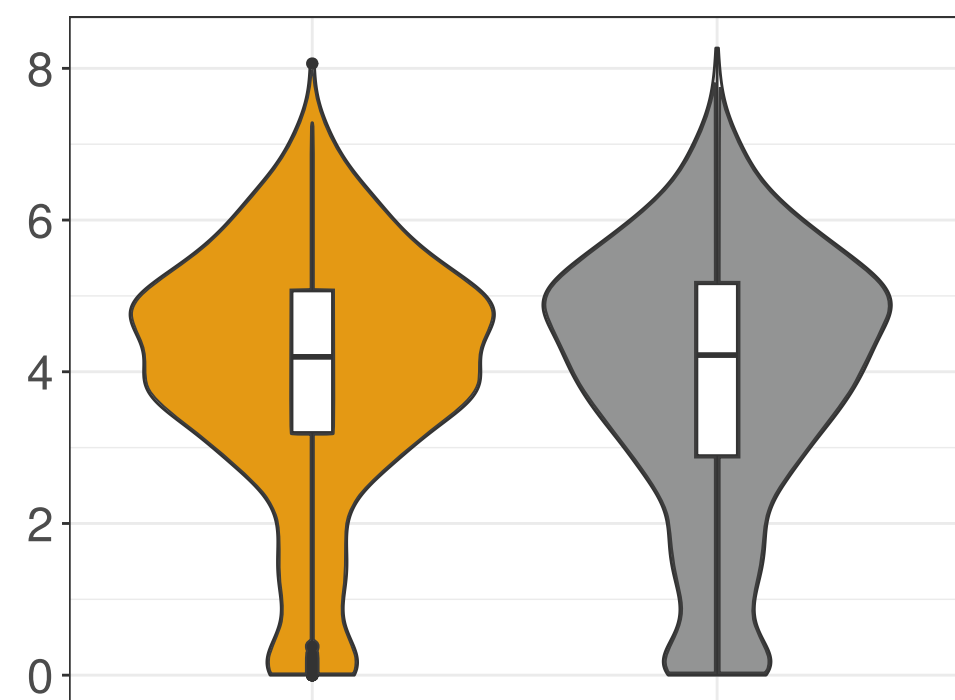

Skeletal Muscle

p-value = 0.965

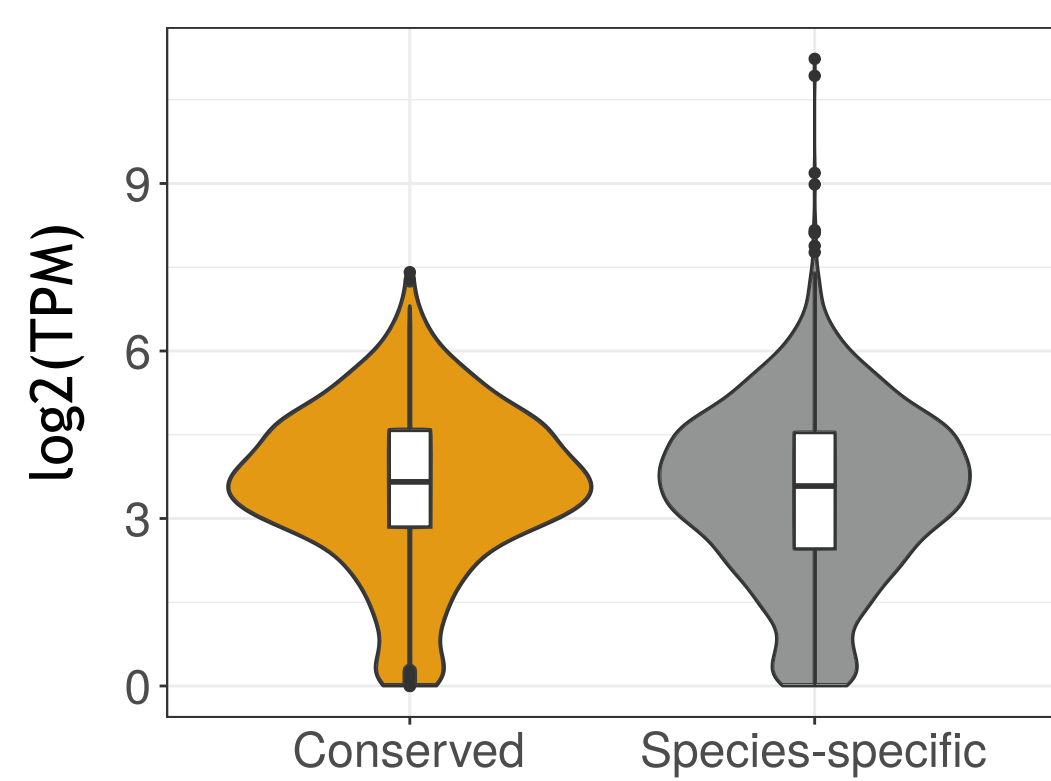

Heart

p-value = 0.965

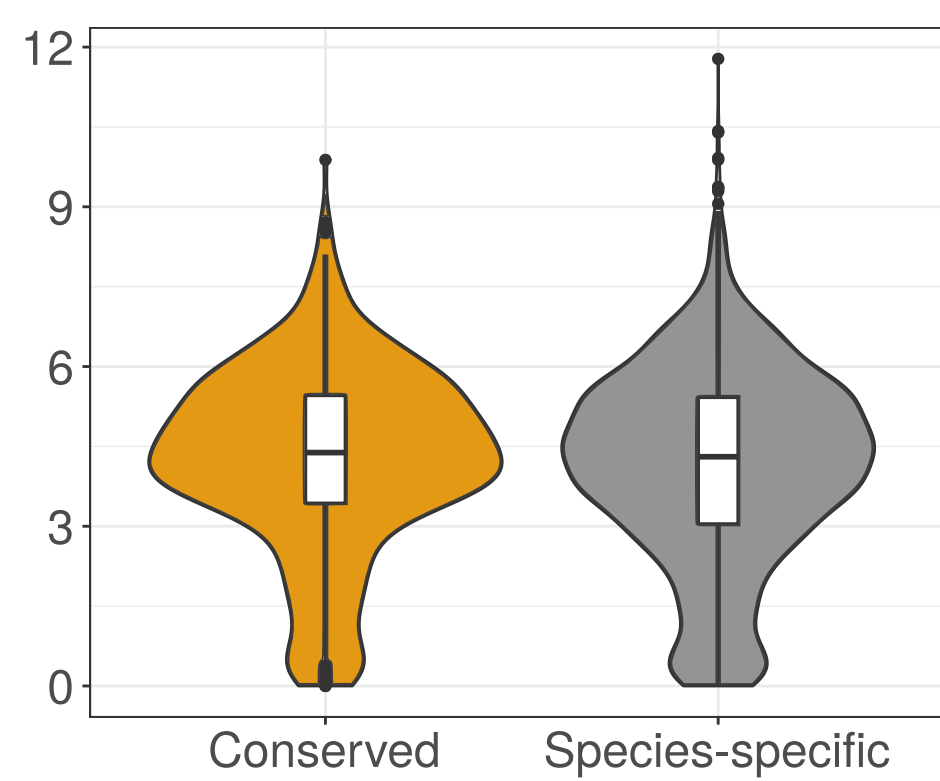

Lung

p-value = 1

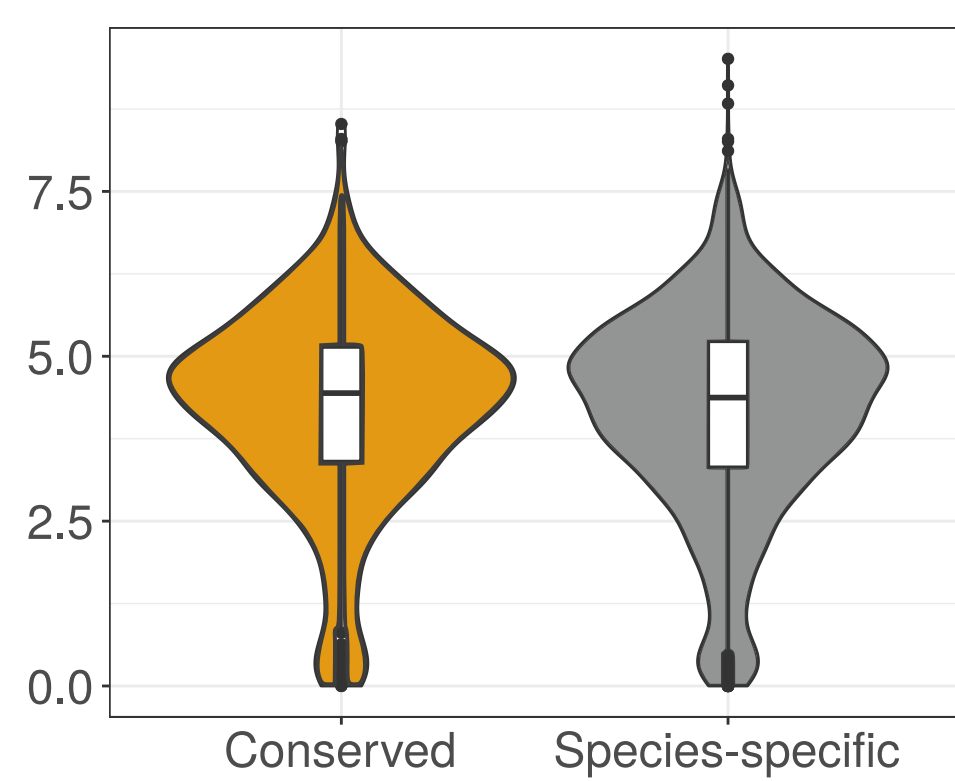

B)

p-value = 0.584

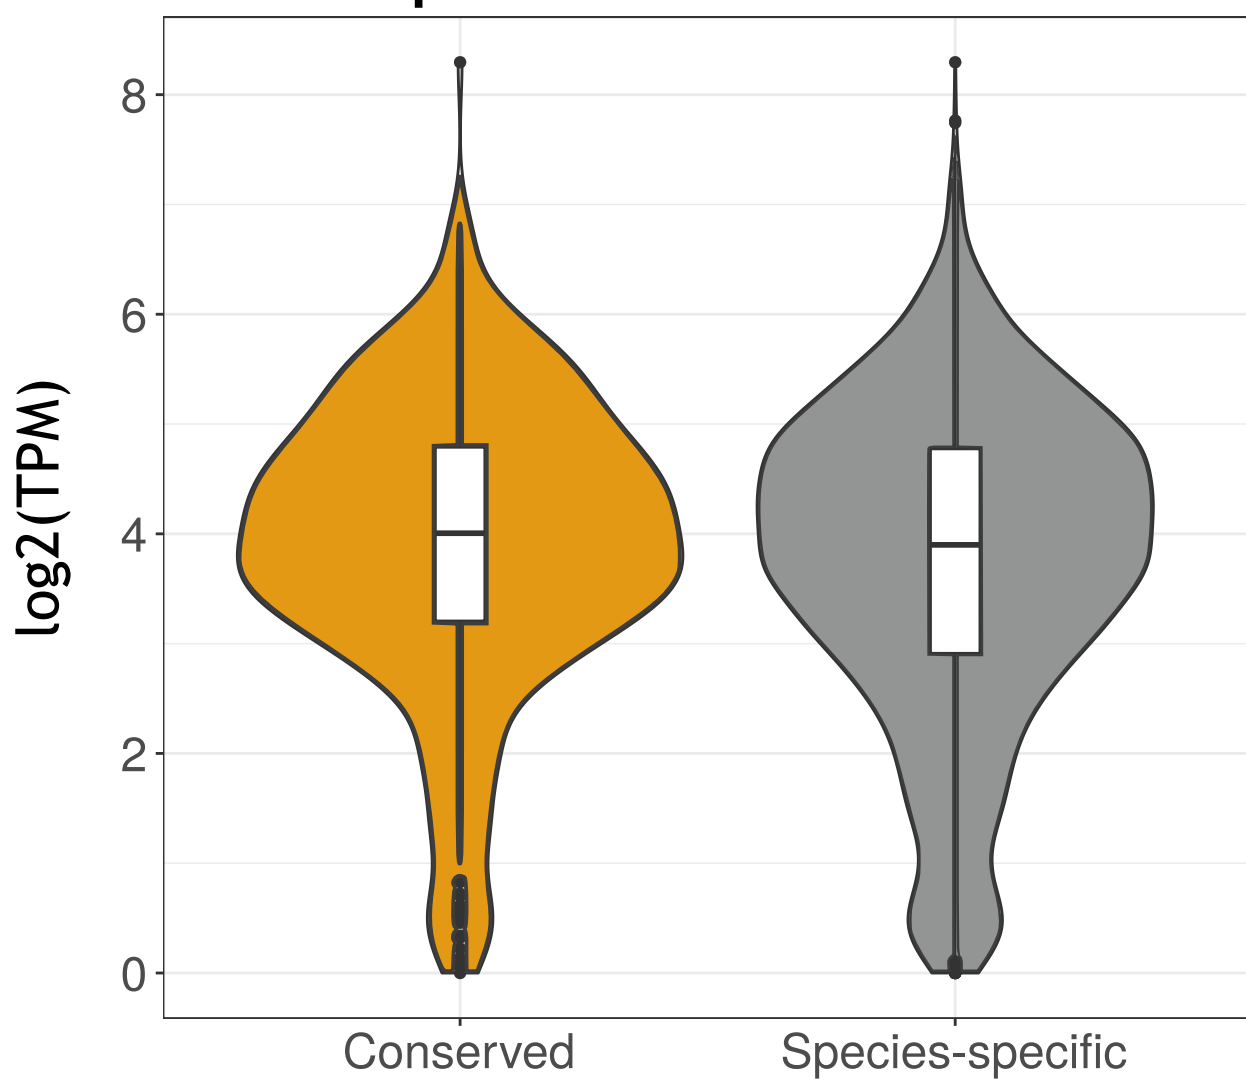

C)

p-value =  $2.23 \times 10^{-20}$ 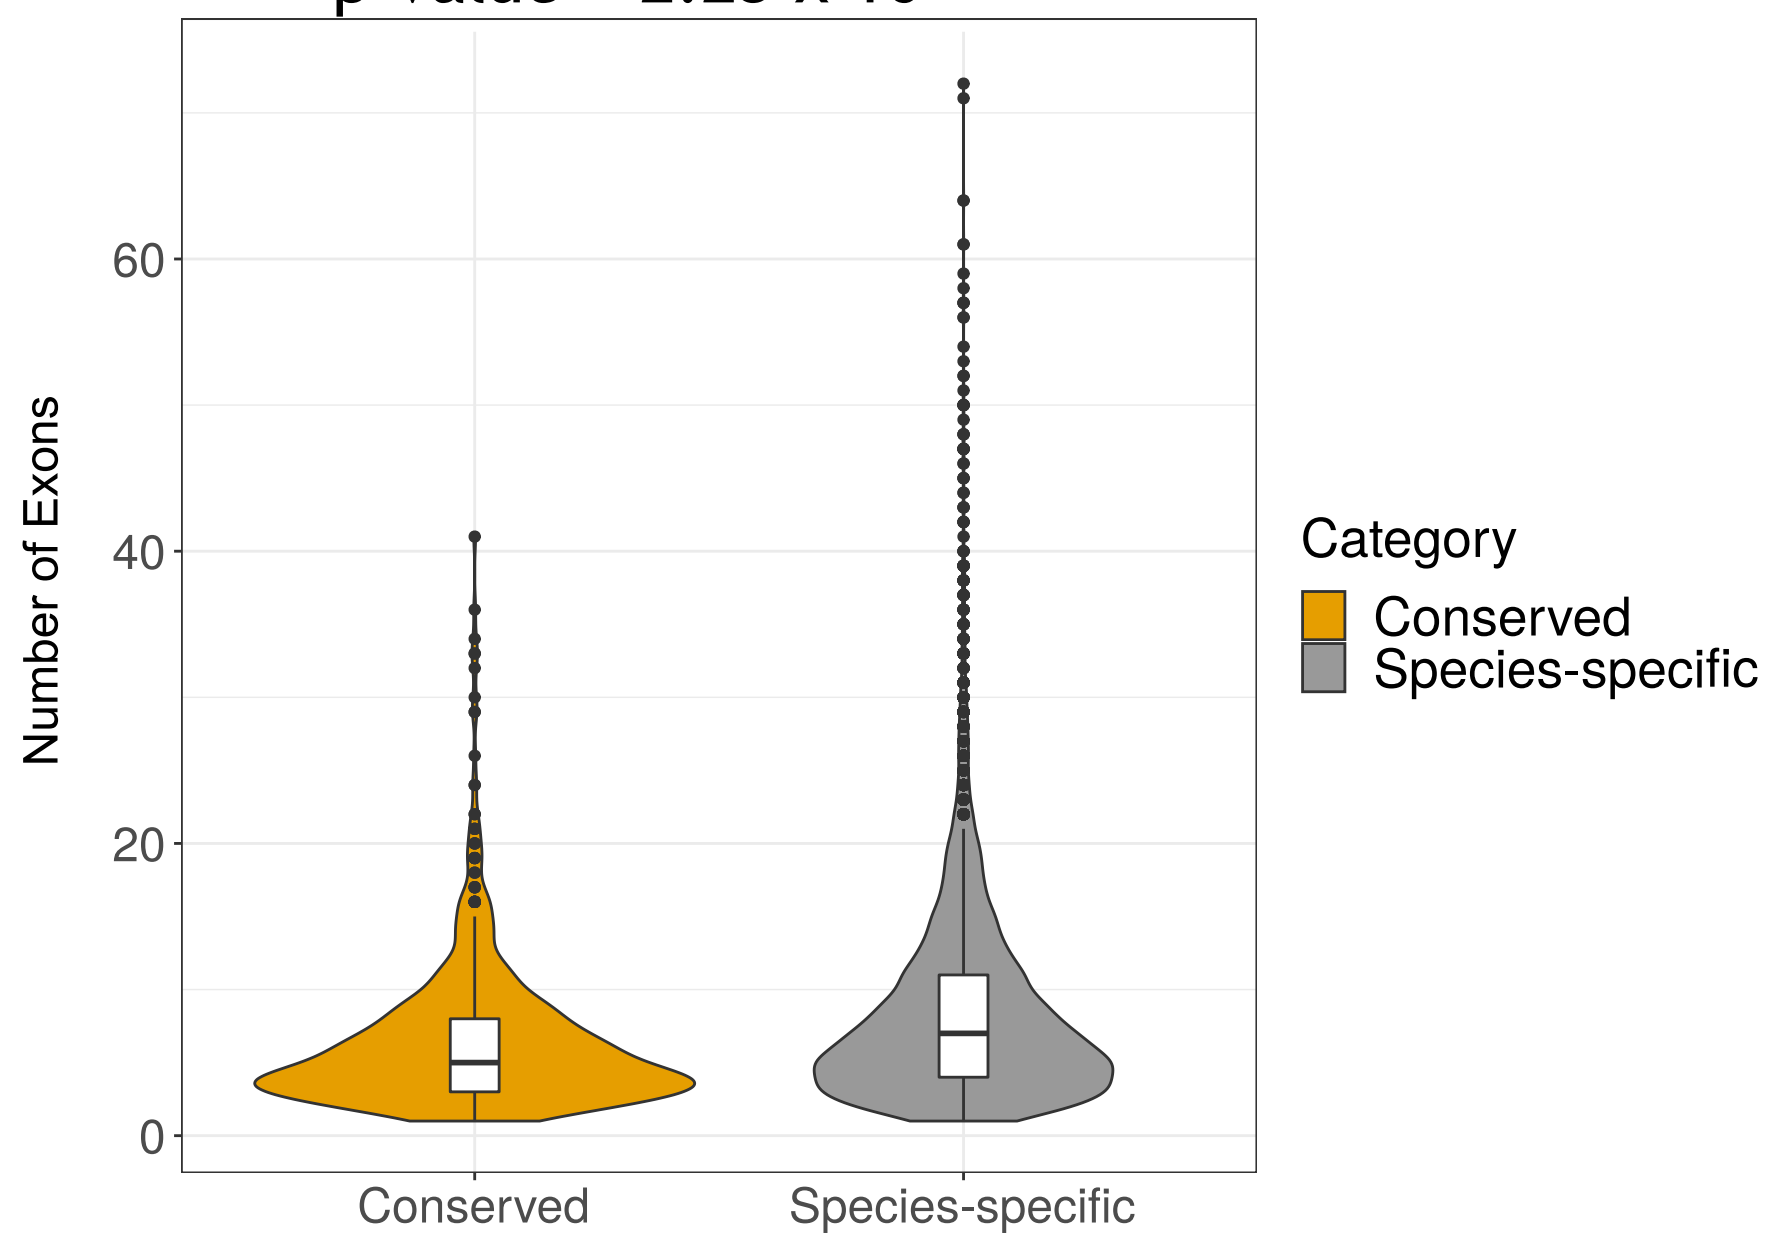

Supplement: supp [file elife-69148-supp-v1.zip]
