# Supplementary material for: Evolutionary dynamics of circular RNAs in primates
Source: eLife. 2021 Sep 20;10:e69148. doi: 10.7554/eLife.69148 (PMC8516421; doi:10.7554/eLife.69148)
Supplement: Supplementary file 1. [file elife-69148-supp1.csv]

Primate	Clade	Species ID	Tissue	SRA ID	Database	Dataset Title	Depth
Baboon	Old World Monkey	9555	Pituitary	SRR1758903	ENA	Tissue-specific RNA-sequencing for ten non-human primate species	56,152,906
Baboon	Old World Monkey	9555	Temporal Lobe	SRR1758904	ENA	Tissue-specific RNA-sequencing for ten non-human primate species	103,229,591
Baboon	Old World Monkey	9555	Cerebellum	SRR1758901	ENA	Tissue-specific RNA-sequencing for ten non-human primate species	90,278,839
Baboon	Old World Monkey	9555	Colon	SRR1758905	ENA	Tissue-specific RNA-sequencing for ten non-human primate species	56,525,749
Baboon	Old World Monkey	9555	Frontal Cortex	SRR1758902	ENA	Tissue-specific RNA-sequencing for ten non-human primate species	88,625,043
Baboon	Old World Monkey	9555	Heart	SRR1758906	ENA	Tissue-specific RNA-sequencing for ten non-human primate species	68,940,375
Baboon	Old World Monkey	9555	Liver	SRR1758908	ENA	Tissue-specific RNA-sequencing for ten non-human primate species	56,685,339
Baboon	Old World Monkey	9555	Lung	SRR1758909	ENA	Tissue-specific RNA-sequencing for ten non-human primate species	80,774,095
Baboon	Old World Monkey	9555	Skeletal Muscle	SRR1758911	ENA	Tissue-specific RNA-sequencing for ten non-human primate species	58520866
Baboon	Old World Monkey	9555	Skeletal Muscle	SRR1758912	ENA	Tissue-specific RNA-sequencing for ten non-human primate species	39,123,484
Baboon	Old World Monkey	9555	Spleen	SRR1758913	ENA	Tissue-specific RNA-sequencing for ten non-human primate species	77,499,220
Chimpanzee	Hominidae	9598	Pituitary	SRR1758918	ENA	Tissue-specific RNA-sequencing for ten non-human primate species	63,573,870
Chimpanzee	Hominidae	9598	Temporal Lobe	SRR1758919	ENA	Tissue-specific RNA-sequencing for ten non-human primate species	50,878,156
Chimpanzee	Hominidae	9598	Frontal Cortex	SRR1758917	ENA	Tissue-specific RNA-sequencing for ten non-human primate species	62,502,038
Chimpanzee	Hominidae	9598	Cerebellum	SRR1758916	ENA	Tissue-specific RNA-sequencing for ten non-human primate species	72,003,563
Chimpanzee	Hominidae	9598	Colon	SRR1758920	ENA	Tissue-specific RNA-sequencing for ten non-human primate species	102,117,236
Chimpanzee	Hominidae	9598	Heart	SRR1758921	ENA	Tissue-specific RNA-sequencing for ten non-human primate species	60,156,270
Chimpanzee	Hominidae	9598	Liver	SRR1758924	ENA	Tissue-specific RNA-sequencing for ten non-human primate species	25,050,505
Chimpanzee	Hominidae	9598	Liver	SRR1758925	ENA	Tissue-specific RNA-sequencing for ten non-human primate species	26,736,656
Chimpanzee	Hominidae	9598	Lung	SRR1758926	ENA	Tissue-specific RNA-sequencing for ten non-human primate species	40,256,045
Chimpanzee	Hominidae	9598	Lung	SRR1758927	ENA	Tissue-specific RNA-sequencing for ten non-human primate species	46,660,180
Chimpanzee	Hominidae	9598	Skeletal Muscle	SRR1758929	ENA	Tissue-specific RNA-sequencing for ten non-human primate species	35,109,721
Chimpanzee	Hominidae	9598	Skeletal Muscle	SRR1758930	ENA	Tissue-specific RNA-sequencing for ten non-human primate species	20,014,663
Chimpanzee	Hominidae	9598	Spleen	SRR1758931	ENA	Tissue-specific RNA-sequencing for ten non-human primate species	26,097,343
Chimpanzee	Hominidae	9598	Spleen	SRR1758932	ENA	Tissue-specific RNA-sequencing for ten non-human primate species	30,064,940
Macaque	Old World Monkey	9544	Cerebellum	http://www.nhprtr.org/data/2014_NHP_tissuespecific/Rhesus_UW/RhesusmacaqueIndian/	NHPRTR	Tissue-specific RNA-sequencing for ten non-human primate species	36,871,455
Macaque	Old World Monkey	9544	Frontal Cortex	http://www.nhprtr.org/data/2014_NHP_tissuespecific/Rhesus_UW/RhesusmacaqueIndian/	NHPRTR	Tissue-specific RNA-sequencing for ten non-human primate species	39,106,688
Macaque	Old World Monkey	9544	Liver	http://www.nhprtr.org/data/2014_NHP_tissuespecific/Rhesus_UW/RhesusmacaqueIndian/	NHPRTR	Tissue-specific RNA-sequencing for ten non-human primate species	44,808,691
Macaque	Old World Monkey	9544	Lung	http://www.nhprtr.org/data/2014_NHP_tissuespecific/Rhesus_UW/RhesusmacaqueIndian/	NHPRTR	Tissue-specific RNA-sequencing for ten non-human primate species	45,298,573
Macaque	Old World Monkey	9544	Skeletal Muscle	http://www.nhprtr.org/data/2014_NHP_tissuespecific/Rhesus_UW/RhesusmacaqueIndian/	NHPRTR	Tissue-specific RNA-sequencing for ten non-human primate species	39,263,576
Macaque	Old World Monkey	9544	Spleen	http://www.nhprtr.org/data/2014_NHP_tissuespecific/Rhesus_UW/RhesusmacaqueIndian/	NHPRTR	Tissue-specific RNA-sequencing for ten non-human primate species	41,667,710
Macaca	Old World Monkey	9541	Heart	SRR1758954	ENA	Tissue-specific RNA-sequencing for ten non-human primate species	57,680,555
Macaca	Old World Monkey	9541	Pituitary	SRR1758937	ENA	Tissue-specific RNA-sequencing for ten non-human primate species	66,478,310
Macaca	Old World Monkey	9541	Temporal Lobe	SRR1758938	ENA	Tissue-specific RNA-sequencing for ten non-human primate species	66,654,914
Macaca	Old World Monkey	9541	Cerebellum	SRR1758948	ENA	Tissue-specific RNA-sequencing for ten non-human primate species	35,813,952
Macaca	Old World Monkey	9541	Cerebellum	SRR1758949	ENA	Tissue-specific RNA-sequencing for ten non-human primate species	43,660,262
Macaca	Old World Monkey	9541	Colon	SRR1758953	ENA	Tissue-specific RNA-sequencing for ten non-human primate species	69,520,433
Macaca	Old World Monkey	9541	Frontal Cortex	SRR1758950	ENA	Tissue-specific RNA-sequencing for ten non-human primate species	74,174,443
Macaca	Old World Monkey	9541	Liver	SRR1758956	ENA	Tissue-specific RNA-sequencing for ten non-human primate species	64,288,272
Macaca	Old World Monkey	9541	Lung	SRR1758957	ENA	Tissue-specific RNA-sequencing for ten non-human primate species	82,251,583
Macaca	Old World Monkey	9541	Pituitary	SRR1758951	ENA	Tissue-specific RNA-sequencing for ten non-human primate species	48,162,632
Macaca	Old World Monkey	9541	Skeletal Muscle	SRR1758959	ENA	Tissue-specific RNA-sequencing for ten non-human primate species	69,218,497
Macaca	Old World Monkey	9541	Spleen	SRR1758960	ENA	Tissue-specific RNA-sequencing for ten non-human primate species	70,882,767
Macaca	Old World Monkey	9541	Temporal Lobe	SRR1758952	ENA	Tissue-specific RNA-sequencing for ten non-human primate species	78,140,166
Marmoset	New World Monkey	9483	Heart	SRR1758981	ENA	Tissue-specific RNA-sequencing for ten non-human primate species	58,466,313
Marmoset	New World Monkey	9483	Brain Left Hemisphere	SRR1758977	ENA	Tissue-specific RNA-sequencing for ten non-human primate species	50,897,102
Marmoset	New World Monkey	9483	Brain Right Hemisphere	SRR1758979	ENA	Tissue-specific RNA-sequencing for ten non-human primate species	69,533,546
Marmoset	New World Monkey	9483	Colon	SRR1758980	ENA	Tissue-specific RNA-sequencing for ten non-human primate species	66,405,587
Marmoset	New World Monkey	9483	Liver	SRR1758984	ENA	Tissue-specific RNA-sequencing for ten non-human primate species	58,122,356
Marmoset	New World Monkey	9483	Lung	SRR1758985	ENA	Tissue-specific RNA-sequencing for ten non-human primate species	74,138,814
Marmoset	New World Monkey	9483	Pituitary	SRR1758978	ENA	Tissue-specific RNA-sequencing for ten non-human primate species	61,574,431
Marmoset	New World Monkey	9483	Skeletal Muscle	SRR1758987	ENA	Tissue-specific RNA-sequencing for ten non-human primate species	56,216,296
Marmoset	New World Monkey	9483	Spleen	SRR1758988	ENA	Tissue-specific RNA-sequencing for ten non-human primate species	57,711,625
Squirrel Monkey	New World Monkey	9521	Temporal Lobe	SRR1759037	ENA	Tissue-specific RNA-sequencing for ten non-human primate species	52155384
Squirrel Monkey	New World Monkey	9521	Cerebellum	SRR1759034	ENA	Tissue-specific RNA-sequencing for ten non-human primate species	65821677
Squirrel Monkey	New World Monkey	9521	Colon	SRR1759038	ENA	Tissue-specific RNA-sequencing for ten non-human primate species	72973270
Squirrel Monkey	New World Monkey	9521	Frontal Cortex	SRR1759035	ENA	Tissue-specific RNA-sequencing for ten non-human primate species	49619279
Squirrel Monkey	New World Monkey	9521	Heart	SRR1759039	ENA	Tissue-specific RNA-sequencing for ten non-human primate species	59379386
Squirrel Monkey	New World Monkey	9521	Liver	SRR1759041	ENA	Tissue-specific RNA-sequencing for ten non-human primate species	49472942
Squirrel Monkey	New World Monkey	9521	Lung	SRR1759042	ENA	Tissue-specific RNA-sequencing for ten non-human primate species	63653416
Squirrel Monkey	New World Monkey	9521	Pituitary	SRR1759036	ENA	Tissue-specific RNA-sequencing for ten non-human primate species	61122693
Squirrel Monkey	New World Monkey	9521	Skeletal Muscle	SRR1759044	ENA	Tissue-specific RNA-sequencing for ten non-human primate species	61287407
Squirrel Monkey	New World Monkey	9521	Spleen	SRR1759045	ENA	Tissue-specific RNA-sequencing for ten non-human primate species	43,375,982
Squirrel Monkey	New World Monkey	9521	Spleen	SRR1759046	ENA	Tissue-specific RNA-sequencing for ten non-human primate species	43375982
Lemur	Prosimian	30608	Temporal Lobe	SRR1758993	ENA	Tissue-specific RNA-sequencing for ten non-human primate species	97,678,744
Lemur	Prosimian	30608	Cerebellum	SRR1758989	ENA	Tissue-specific RNA-sequencing for ten non-human primate species	40282218
Lemur	Prosimian	30608	Cerebellum	SRR1758990	ENA	Tissue-specific RNA-sequencing for ten non-human primate species	33701327
Lemur	Prosimian	30608	Colon	SRR1758994	ENA	Tissue-specific RNA-sequencing for ten non-human primate species	94987670
Lemur	Prosimian	30608	Frontal Cortex	SRR1758991	ENA	Tissue-specific RNA-sequencing for ten non-human primate species	22282358
Lemur	Prosimian	30608	Frontal Cortex	SRR1758992	ENA	Tissue-specific RNA-sequencing for ten non-human primate species	42671438
Lemur	Prosimian	30608	Liver	SRR1758997	ENA	Tissue-specific RNA-sequencing for ten non-human primate species	68821579
Lemur	Prosimian	30608	Lung	SRR1758998	ENA	Tissue-specific RNA-sequencing for ten non-human primate species	76923918
Lemur	Prosimian	30608	Skeletal Muscle	SRR1758999	ENA	Tissue-specific RNA-sequencing for ten non-human primate species	18183486
Lemur	Prosimian	30608	Skeletal Muscle	SRR1759000	ENA	Tissue-specific RNA-sequencing for ten non-human primate species	52445854
Lemur	Prosimian	30608	Skeletal Muscle	SRR1759001	ENA	Tissue-specific RNA-sequencing for ten non-human primate species	17366481
Lemur	Prosimian	30608	Spleen	SRR1759002	ENA	Tissue-specific RNA-sequencing for ten non-human primate species	19307314
Lemur	Prosimian	30608	Spleen	SRR1759003	ENA	Tissue-specific RNA-sequencing for ten non-human primate species	38808580
Human	Hominidae	9606	Brain_1	SRR787271	ENA	Illumina HiSeq 2000 sequencing GSM1101967: Brain Homo sapiens RNA-Seq	39,856,205
Human	Hominidae	9606	Brain_2	SRR3151750	ENA	Illumina HiSeq 2000 sequencing GSM2055779: Brain_rep1 Homo sapiens RNA-Seq	25,114,024
Human	Hominidae	9606	Brain_3	SRR3151756	ENA	Illumina HiSeq 2000 sequencing GSM2055785: Brain_rep2 Homo sapiens RNA-Seq	45,497,333
Human	Hominidae	9606	Cerebellum_1	SRR3192427	ENA	Illumina HiSeq 2000 sequencing GSM2072376: RNA-seq from cerebellum (ENCLB178ZZZ) Homo sapiens RNA-Seq	121,997,943
Human	Hominidae	9606	Cerebellum_2	SRR3192428	ENA	Illumina HiSeq 2000 paired end sequencing; GSM2072377: RNA-seq from cerebellum (ENCLB177ZZZ); Homo sapiens; RNA-Seq	87,218,921
Human	Hominidae	9606	Colon_1	SRR787273	ENA	Illumina HiSeq 2000 paired end sequencing; GSM1101969: Colon; Homo sapiens; RNA-Seq	52,743,718
Human	Hominidae	9606	Colon_2	SRR4421756	ENA	Illumina HiSeq 2500 paired end sequencing; GSM2343672: RNA-seq from transverse colon (ENCLB364ORB); Homo sapiens; RNA-Seq	74,822,941
Human	Hominidae	9606	Colon_3	SRR4422147	ENA	Illumina HiSeq 2500 paired end sequencing; GSM2343980: RNA-seq from transverse colon (ENCLB373HEH); Homo sapiens; RNA-Seq	61,623,646
Human	Hominidae	9606	Colon_4	SRR4422057	ENA	Illumina HiSeq 2500 paired end sequencing; GSM2343949: RNA-seq from transverse colon (ENCLB584WWI); Homo sapiens; RNA-Seq	74,308,778
Human	Hominidae	9606	FrontalCortex_1	SRR3192424	ENA	Illumina HiSeq 2000 paired end sequencing; GSM2072380: RNA-seq from frontal cortex (ENCLB182ZZZ); Homo sapiens; RNA-Seq	114,797,948
Human	Hominidae	9606	FrontalCortex_2	SRR3192425	ENA	Illumina HiSeq 2000 paired end sequencing; GSM2072381: RNA-seq from frontal cortex (ENCLB181ZZZ); Homo sapiens; RNA-Seq	140,166,624
Human	Hominidae	9606	Heart_1	SRR3192433	ENA	Illumina HiSeq 2000 paired end sequencing; GSM2072382: RNA-seq from heart (ENCLB184ZZZ); Homo sapiens; RNA-Seq	77,191,913
Human	Hominidae	9606	Heart_2	SRR3192434	ENA	Illumina HiSeq 2000 paired end sequencing; GSM2072383: RNA-seq from heart (ENCLB183ZZZ); Homo sapiens; RNA-Seq	96,496,582
Human	Hominidae	9606	Heart_3	SRR4421689	ENA	Illumina HiSeq 2000 paired end sequencing; GSM2343070: RNA-seq from heart (ENCLB172ZZZ); Homo sapiens; RNA-Seq	156,515,668
Human	Hominidae	9606	Heart_4	SRR787274	ENA	Illumina HiSeq 2000 paired end sequencing; GSM1101970: Heart; Homo sapiens; RNA-Seq	47,830,286
Human	Hominidae	9606	Liver_1	SRR3192419	ENA	Illumina HiSeq 2000 paired end sequencing; GSM2072373: RNA-seq from liver (ENCLB173ZZZ); Homo sapiens; RNA-Seq	171,397,834
Human	Hominidae	9606	Liver_2	SRR3151759	ENA	Illumina HiSeq 2000 paired end sequencing; GSM2055788: Liver_rep2; Homo sapiens; RNA-Seq	44,480,417
Human	Hominidae	9606	Liver_3	SRR3192440	ENA	Illumina HiSeq 2000 paired end sequencing; GSM2072387: RNA-seq from liver (ENCLB188ZZZ); Homo sapiens; RNA-Seq	46,073,691
Human	Hominidae	9606	Lung_1	SRR3192441	ENA	Illumina HiSeq 2000 paired end sequencing; GSM2072388: RNA-seq from lung (ENCLB190ZZZ); Homo sapiens; RNA-Seq	115,978,515
Human	Hominidae	9606	Lung_2	SRR3192442	ENA	Illumina HiSeq 2000 paired end sequencing; GSM2072389: RNA-seq from lung (ENCLB189ZZZ); Homo sapiens; RNA-Seq	115,731,418
Human	Hominidae	9606	Lung_3	SRR4421631	ENA	Illumina HiSeq 2500 paired end sequencing; GSM2343558: RNA-seq from upper lobe of left lung (ENCLB381WRT); Homo sapiens; RNA-Seq	46,073,691
Human	Hominidae	9606	Lung_4	SRR4421779	ENA	Illumina HiSeq 2500 paired end sequencing; GSM2343696: RNA-seq from upper lobe of left lung (ENCLB308EJA); Homo sapiens; RNA-Seq	47,758,874
Human	Hominidae	9606	SkeletalMuscle_1	SRR3192453	ENA	Illumina HiSeq 2000 paired end sequencing; GSM2072394: RNA-seq from skeletal muscle tissue (ENCLB195ZZZ); Homo sapiens; RNA-Seq	93,154,341
Human	Hominidae	9606	SkeletalMuscle_2	SRR3192454	ENA	Illumina HiSeq 2000 paired end sequencing; GSM2072395: RNA-seq from skeletal muscle tissue (ENCLB196ZZZ); Homo sapiens; RNA-Seq	101,285,674
Human	Hominidae	9606	SkeletalMuscle_3	SRR787278	ENA	Illumina HiSeq 2000 paired end sequencing; GSM1101974: Muscle; Homo sapiens; RNA-Seq	32,157,762
Human	Hominidae	9606	Spleen_1	SRR4422445	ENA	Illumina HiSeq 2500 paired end sequencing; GSM2344317: RNA-seq from spleen (ENCLB088AOF); Homo sapiens; RNA-Seq	46,867,284
Human	Hominidae	9606	Spleen_2	SRR4421468	ENA	Illumina HiSeq 2500 paired end sequencing; GSM2343387: RNA-seq from spleen (ENCLB990KQA); Homo sapiens; RNA-Seq	40,361,760
Human	Hominidae	9606	Spleen_3	SRR4421642	ENA	Illumina HiSeq 2500 paired end sequencing; GSM2343570: RNA-seq from spleen (ENCLB546WAK); Homo sapiens; RNA-Seq	45,609,759
