# Supplementary material for: Evolutionary dynamics of circular RNAs in primates
Source: eLife. 2021 Sep 20;10:e69148. doi: 10.7554/eLife.69148 (PMC8516421; doi:10.7554/eLife.69148)
Supplement: Supplementary file 2. [file elife-69148-supp2.csv]

	Chr	Start	End	Ensembl_ID	CoordExon1	CoordExon2	Category
ENSG00000054523_42-39	1	10342050	10345953	ENSG00000054523	1:10342050-10342168	1:10345621-10345953	Conserved
ENSG00000184677_18-7	1	22506049	22524444	ENSG00000184677	1:22506049-22506241	1:22524218-22524444	Conserved
ENSG00000133216_5-4	1	22781421	22785076	ENSG00000133216	1:22781421-22781485	1:22784392-22785076	Conserved
ENSG00000090273_6-5	1	26942660	26943065	ENSG00000090273	1:26942660-26942776	1:26942871-26943065	Conserved
ENSG00000146463_17-10	1	35381259	35390098	ENSG00000146463	1:35381259-35381433	1:35389948-35390098	Conserved
ENSG00000146463_25-10	1	35381259	35399576	ENSG00000146463	1:35381259-35381433	1:35399482-35399576	Conserved
ENSG00000146463_28-10	1	35381259	35405468	ENSG00000146463	1:35381259-35381433	1:35405373-35405468	Conserved
ENSG00000243710_12-10	1	43197553	43199503	ENSG00000243710	1:43197553-43197692	1:43199390-43199503	Conserved
ENSG00000116171_9-5	1	52941796	52961629	ENSG00000116171	1:52941796-52941853	1:52961503-52961629	Conserved
ENSG00000132849_25-19	1	61856030	61884408	ENSG00000132849	1:61856030-61856239	1:61884237-61884408	Conserved
ENSG00000132849_36-34	1	61990168	62038049	ENSG00000132849	1:61990168-61990364	1:62037977-62038049	Conserved
ENSG00000162607_10-7	1	62443159	62448666	ENSG00000162607	1:62443159-62443319	1:62448465-62448666	Conserved
ENSG00000125703_13-10	1	62829040	62841547	ENSG00000125703	1:62829040-62829176	1:62841428-62841547	Conserved
ENSG00000158966_17-16	1	64663695	64664679	ENSG00000158966	1:64663695-64663837	1:64664200-64664679	Conserved
ENSG00000097033_13-4	1	86715724	86742436	ENSG00000097033	1:86715724-86715865	1:86742208-86742436	Conserved
ENSG00000186141_15-13	1	145839890	145841071	ENSG00000186141	1:145839890-145839991	1:145840922-145841071	Conserved
ENSG00000116984_25-10	1	236824119	236863554	ENSG00000116984	1:236824119-236824127	1:236863454-236863554	Conserved
ENSG00000198626_14-12	1	237423092	237445522	ENSG00000198626	1:237423092-237423248	1:237445401-237445522	Conserved
ENSG00000198626_27-25	1	237530427	237550691	ENSG00000198626	1:237530427-237530510	1:237550544-237550691	Conserved
ENSG00000054282_13-9	1	243304713	243316893	ENSG00000054282	1:243304713-243304777	1:243316755-243316893	Conserved
ENSG00000054282_17-12	1	243307989	243344331	ENSG00000054282	1:243307989-243308177	1:243344215-243344331	Conserved
ENSG00000120549_19-17	10	24521782	24528119	ENSG00000120549	10:24521782-24521929	10:24527936-24528119	Conserved
ENSG00000120549_8-6	10	24380869	24438479	ENSG00000120549	10:24380869-24381005	10:24438386-24438479	Conserved
ENSG00000120539_7-6	10	27165064	27165539	ENSG00000120539	10:27165064-27165170	10:27165389-27165539	Conserved
ENSG00000095564_29-27	10	91996369	92008275	ENSG00000095564	10:91996369-91996570	10:92008123-92008275	Conserved
ENSG00000196865_7-5	10	113876521	113884380	ENSG00000196865	10:113876521-113876976	10:113884251-113884380	Conserved
ENSG00000107518_30-27	10	115426250	115469329	ENSG00000107518	10:115426250-115426302	10:115469172-115469329	Conserved
ENSG00000110076_7-7	11	64685646	64685947	ENSG00000110076	11:64685646-64685947	11:64685646-64685947	Conserved
ENSG00000173992_15-15	11	66605489	66605592	ENSG00000173992	11:66605489-66605592	11:66605489-66605592	Conserved
ENSG00000158636_28-20	11	76472564	76528466	ENSG00000158636	11:76472564-76472840	11:76528268-76528466	Conserved
ENSG00000137494_20-11	11	83206058	83236509	ENSG00000137494	11:83206058-83206165	11:83236404-83236509	Conserved
ENSG00000187240_60-57	11	103219915	103223086	ENSG00000187240	11:103219915-103220028	11:103222965-103223086	Conserved
ENSG00000187240_83-80	11	103311878	103323990	ENSG00000187240	11:103311878-103312033	11:103323886-103323990	Conserved
ENSG00000149311_30-29	11	108258986	108267342	ENSG00000149311	11:108258986-108259075	11:108267171-108267342	Conserved
ENSG00000178105_9-4	11	108673467	108679560	ENSG00000178105	11:108673467-108673527	11:108679371-108679560	Conserved
ENSG00000151067_4-3	12	2115224	2120430	ENSG00000151067	12:2115224-2115384	12:2120325-2120430	Conserved
ENSG00000111752_14-9	12	8920985	8922788	ENSG00000111752	12:8920985-8921065	12:8922633-8922788	Conserved
ENSG00000111581_35-33	12	68733452	68735344	ENSG00000111581	12:68733452-68733525	12:68735231-68735344	Conserved
ENSG00000179104_13-8	12	82930431	82986046	ENSG00000179104	12:82930431-82930545	12:82985925-82986046	Conserved
ENSG00000120800_31-30	12	101333301	101334504	ENSG00000120800	12:101333301-101333444	12:101334425-101334504	Conserved
ENSG00000151148_12-10	12	109481637	109483981	ENSG00000151148	12:109481637-109481742	12:109483861-109483981	Conserved
ENSG00000151948_11-8	12	128912424	128927154	ENSG00000151948	12:128912424-128912460	12:128927105-128927154	Conserved
ENSG00000175664_5-3	13	30952660	30966398	ENSG00000175664	13:30952660-30952825	13:30966222-30966398	Conserved
ENSG00000083642_37-32	13	32753332	32760720	ENSG00000083642	13:32753332-32753536	13:32760575-32760720	Conserved
ENSG00000152767_25-22	13	98409338	98424650	ENSG00000152767	13:98409338-98409525	13:98424572-98424650	Conserved
ENSG00000151338_23-18	14	37285318	37422949	ENSG00000151338	14:37285318-37285447	14:37422855-37422949	Conserved
ENSG00000100578_34-33	14	58498783	58508709	ENSG00000100578	14:58498783-58498960	14:58508555-58508709	Conserved
ENSG00000100578_35-30	14	58488621	58512627	ENSG00000100578	14:58488621-58488874	14:58512522-58512627	Conserved
ENSG00000119685_23-21	14	75732338	75735289	ENSG00000119685	14:75732338-75732419	14:75735195-75735289	Conserved
ENSG00000137770_8-5	15	44484224	44496458	ENSG00000137770	15:44484224-44484314	15:44496380-44496458	Conserved
ENSG00000081014_22-16	15	50948020	50968377	ENSG00000081014	15:50948020-50948159	15:50968263-50968377	Conserved
ENSG00000069943_9-5	15	55329724	55341802	ENSG00000069943	15:55329724-55329854	15:55341738-55341802	Conserved
ENSG00000103671_14-8	15	64406330	64425631	ENSG00000103671	15:64406330-64406459	15:64425540-64425631	Conserved
ENSG00000137764_26-23	15	67748231	67772752	ENSG00000137764	15:67748231-67748257	15:67772707-67772752	Conserved
ENSG00000166233_6-2	15	72518067	72561549	ENSG00000166233	15:72518067-72518134	15:72561452-72561549	Conserved
ENSG00000140463_25-19	15	72731305	72735966	ENSG00000140463	15:72731305-72731457	15:72735517-72735966	Conserved
ENSG00000140526_3-2	15	89113725	89116521	ENSG00000140526	15:89113725-89113816	15:89116322-89116521	Conserved
ENSG00000102858_18-17	16	4677463	4680097	ENSG00000102858	16:4677463-4677572	16:4680032-4680097	Conserved
ENSG00000174628_9-8	16	19730430	19733827	ENSG00000174628	16:19730430-19730494	16:19733698-19733827	Conserved
ENSG00000102893_38-7	16	47497399	47669417	ENSG00000102893	16:47497399-47497488	16:47669215-47669417	Conserved
ENSG00000087253_14-3	16	55525508	55551102	ENSG00000087253	16:55525508-55525647	16:55550949-55551102	Conserved
ENSG00000166263_10-7	17	54999345	55000883	ENSG00000166263	17:54999345-54999451	17:55000808-55000883	Conserved
ENSG00000141452_12-8	18	23515856	23520313	ENSG00000141452	18:23515856-23515886	18:23520202-23520313	Conserved
ENSG00000168234_9-8	18	24080585	24083081	ENSG00000168234	18:24080585-24080779	18:24082913-24083081	Conserved
ENSG00000141431_9-4	18	33607594	33646353	ENSG00000141431	18:33607594-33607676	18:33646245-33646353	Conserved
ENSG00000141431_12-4	18	33607594	33671866	ENSG00000141431	18:33607594-33607676	18:33671747-33671866	Conserved
ENSG00000141431_13-4	18	33607594	33683568	ENSG00000141431	18:33607594-33607676	18:33683405-33683568	Conserved
ENSG00000134759_29-19	18	36142281	36160015	ENSG00000134759	18:36142281-36142311	18:36159957-36160015	Conserved
ENSG00000134775_12-8	18	36576451	36612095	ENSG00000134775	18:36576451-36576545	18:36611952-36612095	Conserved
ENSG00000152240_8-6	18	46118181	46120060	ENSG00000152240	18:46118181-46118316	18:46119926-46120060	Conserved
ENSG00000152240_11-9	18	46122467	46123364	ENSG00000152240	18:46122467-46122590	18:46123181-46123364	Conserved
ENSG00000091157_20-13	18	56717964	56816144	ENSG00000091157	18:56717964-56718159	18:56816031-56816144	Conserved
ENSG00000172175_5-4	18	58696366	58700591	ENSG00000172175	18:58696366-58696487	18:58700441-58700591	Conserved
ENSG00000101542_8-6	18	61500383	61507560	ENSG00000101542	18:61500383-61500502	18:61507373-61507560	Conserved
ENSG00000141655_6-5	18	62348168	62349937	ENSG00000141655	18:62348168-62348249	18:62349812-62349937	Conserved
ENSG00000104885_7-2	19	2180713	2194577	ENSG00000104885	19:2180713-2180756	19:2194515-2194577	Conserved
ENSG00000104885_7-3	19	2185855	2194577	ENSG00000104885	19:2185855-2185929	19:2194515-2194577	Conserved
ENSG00000142453_9-7	19	10913877	10916777	ENSG00000142453	19:10913877-10913931	19:10916696-10916777	Conserved
ENSG00000168813_9-7	19	32356616	32360618	ENSG00000168813	19:32356616-32356733	19:32360504-32360618	Conserved
ENSG00000086544_7-5	19	40733160	40737769	ENSG00000086544	19:40733160-40733364	19:40737698-40737769	Conserved
ENSG00000099954_8-7	22	17503082	17505016	ENSG00000099954	22:17503082-17503131	22:17504847-17505016	Conserved
ENSG00000054611_18-16	22	46974290	47037198	ENSG00000054611	22:46974290-46974399	22:47037071-47037198	Conserved
ENSG00000183960_14-10	3	19438164	19456982	ENSG00000183960	3:19438164-19438361	3:19456768-19456982	Conserved
ENSG00000144642_19-14	3	29868858	29899755	ENSG00000144642	3:29868858-29868964	3:29899705-29899755	Conserved
ENSG00000145088_11-8	3	121844453	121872788	ENSG00000145088	3:121844453-121844547	3:121872537-121872788	Conserved
ENSG00000125386_17-9	4	2657803	2690970	ENSG00000125386	4:2657803-2657880	4:2690698-2690970	Conserved
ENSG00000138802_18-17	4	109521117	109521626	ENSG00000138802	4:109521117-109521172	4:109521420-109521626	Conserved
ENSG00000138802_24-23	4	109530289	109531522	ENSG00000138802	4:109530289-109530464	4:109531385-109531522	Conserved
ENSG00000071205_17-5	4	147857553	147913139	ENSG00000071205	4:147857553-147857654	4:147913074-147913139	Conserved
ENSG00000129116_26-17	4	168890922	168916027	ENSG00000129116	4:168890922-168891057	4:168915895-168916027	Conserved
ENSG00000164151_9-7	5	5441112	5444326	ENSG00000164151	5:5441112-5441223	5:5444289-5444326	Conserved
ENSG00000151422_15-6	5	108832770	108897848	ENSG00000151422	5:108832770-108832820	5:108897648-108897848	Conserved
ENSG00000112893_12-6	5	109767535	109789527	ENSG00000112893	5:109767535-109767708	5:109789460-109789527	Conserved
ENSG00000134982_12-7	5	112766326	112801383	ENSG00000134982	5:112766326-112766383	5:112801279-112801383	Conserved
ENSG00000137275_8-7	6	3104225	3106051	ENSG00000137275	6:3104225-3104315	6:3105482-3106051	Conserved
ENSG00000124782_12-8	6	7181124	7189322	ENSG00000124782	6:7181124-7181158	6:7189159-7189322	Conserved
ENSG00000168566_5-3	6	7593734	7595101	ENSG00000168566	6:7593734-7593847	6:7595027-7595101	Conserved
ENSG00000112186_14-11	6	17507169	17513954	ENSG00000112186	6:17507169-17507312	6:17513849-17513954	Conserved
ENSG00000165097_20-18	6	18215007	18217885	ENSG00000165097	6:18215007-18215129	6:18217733-18217885	Conserved
ENSG00000079691_13-7	6	25449898	25472521	ENSG00000079691	6:25449898-25449995	6:25472427-25472521	Conserved
ENSG00000112624_10-8	6	42822796	42830172	ENSG00000112624	6:42822796-42822844	6:42828493-42830172	Conserved
ENSG00000146147_14-11	6	54160367	54169572	ENSG00000146147	6:54160367-54160432	6:54169528-54169572	Conserved
ENSG00000146147_16-11	6	54160367	54202233	ENSG00000146147	6:54160367-54160432	6:54202105-54202233	Conserved
ENSG00000082269_29-26	6	70533160	70538401	ENSG00000082269	6:70533160-70533251	6:70538291-70538401	Conserved
ENSG00000112701_29-9	6	75634707	75703072	ENSG00000112701	6:75634707-75634811	6:75702645-75703072	Conserved
ENSG00000164418_7-5	6	101676623	101686353	ENSG00000164418	6:101676623-101676804	6:101686180-101686353	Conserved
ENSG00000197081_18-15	6	160046498	160048543	ENSG00000197081	6:160046498-160046645	6:160048375-160048543	Conserved
ENSG00000130023_13-8	6	169759838	169768171	ENSG00000130023	6:169759838-169759857	6:169767015-169768171	Conserved
ENSG00000112584_12-10	6	170388287	170395579	ENSG00000112584	6:170388287-170388493	6:170395487-170395579	Conserved
ENSG00000196367_6-4	7	98890335	98893881	ENSG00000196367	7:98890335-98890399	7:98893798-98893881	Conserved
ENSG00000004866_16-7	7	117099762	117170976	ENSG00000004866	7:117099762-117099839	7:117170862-117170976	Conserved
ENSG00000157741_13-11	7	139273297	139276147	ENSG00000157741	7:139273297-139273410	7:139276097-139276147	Conserved
ENSG00000078674_52-51	8	18011237	18011827	ENSG00000078674	8:18011237-18011366	8:18011667-18011827	Conserved
ENSG00000147481_36-34	8	50502778	50536808	ENSG00000147481	8:50502778-50502880	8:50536678-50536808	Conserved
ENSG00000046889_13-6	8	68022036	68060779	ENSG00000046889	8:68022036-68022140	8:68060679-68060779	Conserved
ENSG00000165084_18-11	8	68521799	68721437	ENSG00000165084	8:68521799-68521939	8:68721361-68721437	Conserved
ENSG00000164953_24-16	8	93763842	93785378	ENSG00000164953	8:93763842-93763933	8:93785222-93785378	Conserved
ENSG00000156162_7-2	8	94726331	94756159	ENSG00000156162	8:94726331-94726441	8:94756036-94756159	Conserved
ENSG00000104450_16-15	8	100220279	100225339	ENSG00000104450	8:100220279-100220431	8:100225173-100225339	Conserved
ENSG00000176406_27-10	8	103910134	103961133	ENSG00000176406	8:103910134-103910201	8:103961065-103961133	Conserved
ENSG00000132294_8-6	8	131949969	131955905	ENSG00000132294	8:131949969-131950090	8:131955768-131955905	Conserved
ENSG00000158079_9-2	9	94064734	94095454	ENSG00000158079	9:94064734-94064821	9:94095317-94095454	Conserved
ENSG00000130956_6-3	9	96458379	96471094	ENSG00000130956	9:96458379-96458541	9:96471011-96471094	Conserved
ENSG00000047644_10-8	X	10090771	10098579	ENSG00000047644	X:10090771-10090900	X:10098506-10098579	Conserved
ENSG00000169891_7-3	X	17006221	17029623	ENSG00000169891	X:17006221-17006344	X:17029526-17029623	Conserved
ENSG00000086758_23-23	X	53614534	53614745	ENSG00000086758	X:53614534-53614745	X:53614534-53614745	Conserved
ENSG00000063601_23-5	X	150699195	150750843	ENSG00000063601	X:150699195-150699300	X:150750730-150750843	Conserved
ENSG00000198718_14-12	14	45008913	45012075	ENSG00000198718	14:45008913-45009145	14:45011887-45012075	Conserved
ENSG00000102531_18-14	13	49167244	49175541	ENSG00000102531	13:49167244-49167303	13:49175367-49175541	Conserved
ENSG00000112242_8-3	6	20479846	20488248	ENSG00000112242	6:20479846-20479957	6:20488113-20488248	Conserved
ENSG00000198682_10-4	10	87709196	87715843	ENSG00000198682	10:87709196-87709313	10:87715732-87715843	Conserved
ENSG00000117602_9-8	1	24531218	24533254	ENSG00000117602	1:24531218-24531391	1:24533083-24533254	Conserved
ENSG00000118412_9-7	6	89854817	89857199	ENSG00000118412	6:89854817-89854917	6:89857084-89857199	Conserved
ENSG00000112137_13-12	6	13227816	13230193	ENSG00000112137	6:13227816-13228063	6:13230037-13230193	Conserved
ENSG00000112137_13-11	6	13205815	13230193	ENSG00000112137	6:13205815-13206136	6:13230037-13230193	Conserved
ENSG00000112530_8-7	6	163062150	163089408	ENSG00000112530	6:163062150-163062321	6:163089259-163089408	Conserved
ENSG00000171100_14-5	X	150614589	150663609	ENSG00000171100	X:150614589-150614699	X:150663433-150663609	Conserved
ENSG00000143363_11-6	1	151017812	151027327	ENSG00000143363	1:151017812-151017904	1:151027233-151027327	Conserved
ENSG00000079841_39-36	6	72295937	72333835	ENSG00000079841	6:72295937-72295966	6:72333600-72333835	Conserved
ENSG00000079841_4-2	6	71968983	72099986	ENSG00000079841	6:71968983-71969063	6:72099975-72099986	Conserved
ENSG00000139372_16-12	12	103982799	103985728	ENSG00000139372	12:103982799-103982810	12:103985603-103985728	Conserved
ENSG00000081019_8-8	1	113797363	113798036	ENSG00000081019	1:113797363-113798036	1:113797363-113798036	Conserved
ENSG00000165338_7-4	10	91425281	91462184	ENSG00000165338	10:91425281-91425410	10:91462095-91462184	Conserved
ENSG00000138190_23-4	10	92893349	92955714	ENSG00000138190	10:92893349-92893520	10:92955580-92955714	Conserved
ENSG00000119906_18-15	10	100937402	100944128	ENSG00000119906	10:100937402-100937477	10:100943654-100944128	Conserved
ENSG00000107862_11-9	10	102358039	102359435	ENSG00000107862	10:102358039-102358186	10:102359099-102359435	Conserved
ENSG00000179241_6-6	11	36227085	36227430	ENSG00000179241	11:36227085-36227430	11:36227085-36227430	Conserved
ENSG00000187240_83-72	11	103280348	103323990	ENSG00000187240	11:103280348-103280413	11:103323886-103323990	Conserved
ENSG00000166266_19-17	11	108094391	108095691	ENSG00000166266	11:108094391-108094514	11:108095530-108095691	Conserved
ENSG00000110395_5-4	11	119273868	119274953	ENSG00000110395	11:119273868-119274024	11:119274832-119274953	Conserved
ENSG00000196914_45-41	11	120474560	120477526	ENSG00000196914	11:120474560-120474635	11:120477447-120477526	Conserved
ENSG00000023171_14-12	11	123594082	123596037	ENSG00000023171	11:123594082-123594166	11:123595942-123596037	Conserved
ENSG00000110074_12-11	11	126272969	126273454	ENSG00000110074	11:126272969-126273079	11:126273089-126273454	Conserved
ENSG00000078246_5-4	12	2920763	2922402	ENSG00000078246	12:2920763-2920922	12:2922262-2922402	Conserved
ENSG00000111752_10-9	12	8920985	8921750	ENSG00000111752	12:8920985-8921065	12:8921601-8921750	Conserved
ENSG00000139154_10-4	12	19462510	19518113	ENSG00000139154	12:19462510-19462717	12:19518087-19518113	Conserved
ENSG00000172572_16-10	12	20637100	20654205	ENSG00000172572	12:20637100-20637237	12:20653947-20654205	Conserved
ENSG00000172572_9-5	12	20616230	20635056	ENSG00000172572	12:20616230-20616384	12:20634902-20635056	Conserved
ENSG00000111058_19-15	12	81199341	81233471	ENSG00000111058	12:81199341-81199444	12:81233349-81233471	Conserved
ENSG00000028203_35-18	12	95257150	95296258	ENSG00000028203	12:95257150-95257181	12:95296051-95296258	Conserved
ENSG00000111785_12-10	12	106842589	106851594	ENSG00000111785	12:106842589-106842817	12:106851450-106851594	Conserved
ENSG00000174989_7-4	12	116928023	116964854	ENSG00000174989	12:116928023-116928127	12:116964697-116964854	Conserved
ENSG00000151948_9-5	12	128888639	128914989	ENSG00000151948	12:128888639-128888744	12:128914900-128914989	Conserved
ENSG00000152520_5-2	13	28174272	28197346	ENSG00000152520	13:28174272-28174393	13:28197185-28197346	Conserved
ENSG00000172766_12-5	13	41316846	41336756	ENSG00000172766	13:41316846-41316930	13:41336650-41336756	Conserved
ENSG00000102780_15-14	13	42159266	42160136	ENSG00000102780	13:42159266-42159372	13:42160011-42160136	Conserved
ENSG00000102780_24-18	13	42168440	42190525	ENSG00000102780	13:42168440-42168548	13:42190403-42190525	Conserved
ENSG00000136169_14-11	13	49480219	49483563	ENSG00000136169	13:49480219-49480335	13:49483464-49483563	Conserved
ENSG00000136169_17-10	13	49476476	49490910	ENSG00000136169	13:49476476-49477039	13:49490822-49490910	Conserved
ENSG00000083544_16-7	13	60439688	60494575	ENSG00000083544	13:60439688-60439772	13:60494435-60494575	Conserved
ENSG00000197776_13-3	14	49709159	49740182	ENSG00000197776	14:49709159-49709229	14:49740098-49740182	Conserved
ENSG00000180998_4-3	14	52598272	52600341	ENSG00000180998	14:52598272-52598315	14:52600113-52600341	Conserved
ENSG00000066455_7-4	14	92809300	92816421	ENSG00000066455	14:92809300-92809519	14:92816251-92816421	Conserved
ENSG00000197102_113-112	14	102040236	102040673	ENSG00000197102	14:102040236-102040410	14:102040598-102040673	Conserved
ENSG00000089902_11-6	14	102708465	102721377	ENSG00000089902	14:102708465-102708583	14:102721320-102721377	Conserved
ENSG00000198838_17-14	15	33579976	33586116	ENSG00000198838	15:33579976-33580144	15:33585998-33586116	Conserved
ENSG00000174197_5-3	15	41696075	41699159	ENSG00000174197	15:41696075-41696583	15:41699064-41699159	Conserved
ENSG00000166734_9-6	15	44328685	44338317	ENSG00000166734	15:44328685-44328787	15:44338237-44338317	Conserved
ENSG00000081014_21-16	15	50948020	50958794	ENSG00000081014	15:50948020-50948159	15:50958492-50958794	Conserved
ENSG00000137766_9-6	15	54321939	54338489	ENSG00000137766	15:54321939-54322095	15:54338361-54338489	Conserved
ENSG00000033800_14-11	15	68173732	68181354	ENSG00000033800	15:68173732-68173892	15:68181211-68181354	Conserved
ENSG00000033800_8-5	15	68141946	68146700	ENSG00000033800	15:68141946-68142030	15:68146566-68146700	Conserved
ENSG00000170776_20-16	15	85655417	85669830	ENSG00000170776	15:85655417-85655787	15:85669722-85669830	Conserved
ENSG00000140525_20-17	15	89268399	89276891	ENSG00000140525	15:89268399-89268525	15:89276711-89276891	Conserved
ENSG00000140575_11-10	15	90441506	90443478	ENSG00000140575	15:90441506-90441684	15:90443394-90443478	Conserved
ENSG00000140577_16-14	15	90619741	90629532	ENSG00000140577	15:90619741-90619790	15:90629234-90629532	Conserved
ENSG00000173575_29-10	15	92937518	92974950	ENSG00000173575	15:92937518-92937541	15:92974879-92974950	Conserved
ENSG00000173575_38-30	15	92978148	92985673	ENSG00000173575	15:92978148-92978383	15:92985498-92985673	Conserved
ENSG00000140563_23-17	15	94367605	94402019	ENSG00000140563	15:94367605-94367791	15:94401900-94402019	Conserved
ENSG00000140563_23-19	15	94384022	94402019	ENSG00000140563	15:94384022-94384124	15:94401900-94402019	Conserved
ENSG00000154237_13-12	15	101010450	101010837	ENSG00000154237	15:101010450-101010577	15:101010674-101010837	Conserved
ENSG00000166669_23-21	16	10473479	10480964	ENSG00000166669	16:10473479-10473534	16:10480879-10480964	Conserved
ENSG00000140718_8-6	16	53873786	53888951	ENSG00000140718	16:53873786-53873865	16:53888832-53888951	Conserved
ENSG00000186153_11-8	16	78108423	78164289	ENSG00000186153	16:78108423-78108487	16:78164183-78164289	Conserved
ENSG00000141564_28-26	17	80891720	80893865	ENSG00000141564	17:80891720-80891837	17:80893707-80893865	Conserved
ENSG00000008441_10-7	19	13073047	13075671	ENSG00000008441	19:13073047-13073109	19:13075535-13075671	Conserved
ENSG00000105176_6-5	19	29985223	29986417	ENSG00000105176	19:29985223-29985301	19:29986282-29986417	Conserved
ENSG00000149654_4-4	20	46240963	46241257	ENSG00000149654	20:46240963-46241257	20:46240963-46241257	Conserved
ENSG00000149658_4-4	20	63202287	63203807	ENSG00000149658	20:63202287-63203807	20:63202287-63203807	Conserved
ENSG00000065882_23-15	4	38035588	38054338	ENSG00000065882	4:38035588-38035698	4:38054199-38054338	Conserved
ENSG00000109320_8-4	4	102525512	102537956	ENSG00000109320	4:102525512-102525557	4:102537599-102537956	Conserved
ENSG00000164100_8-5	4	118105018	118143684	ENSG00000164100	4:118105018-118105105	4:118143556-118143684	Conserved
ENSG00000109458_14-12	4	143437999	143440382	ENSG00000109458	4:143437999-143438041	4:143440079-143440382	Conserved
ENSG00000071205_17-15	4	147906638	147913139	ENSG00000071205	4:147906638-147906719	4:147913074-147913139	Conserved
ENSG00000071205_21-18	4	147939825	147955374	ENSG00000071205	4:147939825-147939899	4:147955316-147955374	Conserved
ENSG00000071205_23-18	4	147939825	147966839	ENSG00000071205	4:147939825-147939899	4:147966680-147966839	Conserved
ENSG00000150627_20-16	4	176149807	176151967	ENSG00000150627	4:176149807-176149956	4:176151812-176151967	Conserved
ENSG00000164306_19-10	4	184659340	184685684	ENSG00000164306	4:184659340-184659437	4:184685576-184685684	Conserved
ENSG00000164151_19-16	5	5466334	5476079	ENSG00000164151	5:5466334-5466502	5:5475973-5476079	Conserved
ENSG00000112893_19-17	5	109842328	109847790	ENSG00000112893	5:109842328-109842461	5:109847657-109847790	Conserved
ENSG00000064651_12-5	5	128114212	128141981	ENSG00000064651	5:128114212-128114287	5:128141830-128141981	Conserved
ENSG00000145868_15-13	5	148406257	148410765	ENSG00000145868	5:148406257-148406394	5:148410635-148410765	Conserved
ENSG00000113742_14-10	5	173944967	173953272	ENSG00000113742	5:173944967-173945092	5:173953091-173953272	Conserved
ENSG00000244694_3-3	6	48008634	48009114	ENSG00000244694	6:48008634-48009114	6:48008634-48009114	Conserved
ENSG00000005483_22-16	7	105073619	105077433	ENSG00000005483	7:105073619-105073677	7:105077303-105077433	Conserved
ENSG00000005483_24-16	7	105073619	105078963	ENSG00000005483	7:105073619-105073677	7:105078846-105078963	Conserved
ENSG00000155561_12-6	7	135577796	135593192	ENSG00000155561	7:135577796-135578024	7:135592987-135593192	Conserved
ENSG00000155561_35-32	7	135625164	135630470	ENSG00000155561	7:135625164-135625355	7:135630344-135630470	Conserved
ENSG00000120915_10-7	8	27503604	27506994	ENSG00000120915	8:27503604-27503759	8:27506872-27506994	Conserved
ENSG00000165392_18-9	8	31080867	31096850	ENSG00000165392	8:31080867-31081296	8:31096768-31096850	Conserved
ENSG00000104218_22-11	8	67103037	67137603	ENSG00000104218	8:67103037-67103135	8:67137456-67137603	Conserved
ENSG00000104218_31-23	8	67149783	67164508	ENSG00000104218	8:67149783-67149935	8:67164391-67164508	Conserved
ENSG00000164953_28-25	8	93786223	93791319	ENSG00000164953	8:93786223-93786346	8:93791210-93791319	Conserved
ENSG00000104450_19-15	8	100220279	100233537	ENSG00000104450	8:100220279-100220431	8:100233171-100233537	Conserved
ENSG00000176406_40-32	8	104013442	104148848	ENSG00000176406	8:104013442-104013621	8:104148607-104148848	Conserved
ENSG00000176406_40-35	8	104041326	104148848	ENSG00000176406	8:104041326-104041358	8:104148607-104148848	Conserved
ENSG00000176406_40-37	8	104068512	104148848	ENSG00000176406	8:104068512-104068612	8:104148607-104148848	Conserved
ENSG00000176406_40-38	8	104093471	104148848	ENSG00000176406	8:104093471-104093643	8:104148607-104148848	Conserved
ENSG00000169946_5-4	8	105419144	105444381	ENSG00000169946	8:105419144-105419260	8:105444280-105444381	Conserved
ENSG00000169946_7-4	8	105419144	105561481	ENSG00000169946	8:105419144-105419260	8:105561363-105561481	Conserved
ENSG00000169946_8-4	8	105419144	105634357	ENSG00000169946	8:105419144-105419260	8:105634246-105634357	Conserved
ENSG00000104412_6-5	8	108449823	108450492	ENSG00000104412	8:108449823-108449936	8:108450428-108450492	Conserved
ENSG00000164758_7-4	8	117528651	117530827	ENSG00000164758	8:117528651-117528809	8:117530364-117530827	Conserved
ENSG00000156831_11-10	8	125357219	125357818	ENSG00000156831	8:125357219-125357319	8:125357712-125357818	Conserved
ENSG00000148053_9-6	9	84702159	84710791	ENSG00000148053	9:84702159-84702233	9:84710637-84710791	Conserved
ENSG00000047644_10-4	X	10063445	10098579	ENSG00000047644	X:10063445-10063554	X:10098506-10098579	Conserved
ENSG00000047644_11-4	X	10063445	10110020	ENSG00000047644	X:10063445-10063554	X:10109778-10110020	Conserved
ENSG00000047644_7-4	X	10063445	10079804	ENSG00000047644	X:10063445-10063554	X:10079725-10079804	Conserved
ENSG00000101868_35-2	X	24699425	24888122	ENSG00000101868	X:24699425-24699549	X:24888006-24888122	Conserved
ENSG00000169306_5-3	X	29282938	29399308	ENSG00000169306	X:29282938-29283217	X:29399155-29399308	Conserved
ENSG00000169306_5-4	X	29396258	29399308	ENSG00000169306	X:29396258-29396444	X:29399155-29399308	Conserved
ENSG00000165240_23-21	X	78014662	78020398	ENSG00000165240	X:78014662-78014753	X:78020244-78020398	Conserved
ENSG00000155966_6-4	X	148651999	148662768	ENSG00000155966	X:148651999-148652119	X:148661908-148662768	Conserved
ENSG00000138182_29-25	10	89743808	89754673	ENSG00000138182	10:89743808-89743927	10:89754518-89754673	Conserved
ENSG00000128585_11-6	7	131375424	131399433	ENSG00000128585	7:131375424-131375493	7:131399238-131399433	Conserved
ENSG00000128585_23-14	7	131429033	131470944	ENSG00000128585	7:131429033-131429145	7:131470838-131470944	Conserved
ENSG00000204764_22-9	5	170892387	170924550	ENSG00000204764	5:170892387-170892490	5:170924356-170924550	Conserved
ENSG00000204764_10-6	5	170878097	170896115	ENSG00000204764	5:170878097-170878243	5:170896050-170896115	Conserved
ENSG00000079805_19-14	19	10795372	10805967	ENSG00000079805	19:10795372-10795439	19:10805916-10805967	Conserved
ENSG00000139372_16-15	12	103984749	103985728	ENSG00000139372	12:103984749-103984920	12:103985603-103985728	Conserved
ENSG00000116688_18-16	1	12001401	12002103	ENSG00000116688	1:12001401-12001554	1:12001982-12002103	Conserved
ENSG00000116138_4-3	1	15534237	15536814	ENSG00000116138	1:15534237-15534303	1:15536475-15536814	Conserved
ENSG00000004487_10-5	1	23050387	23059167	ENSG00000004487	1:23050387-23050520	1:23059073-23059167	Conserved
ENSG00000004487_5-3	1	23030469	23050520	ENSG00000004487	1:23030469-23030634	1:23050387-23050520	Conserved
ENSG00000130695_10-6	1	26255171	26259802	ENSG00000130695	1:26255171-26255350	1:26259617-26259802	Conserved
ENSG00000157077_15-13	1	52293453	52303925	ENSG00000157077	1:52293453-52293677	1:52303821-52303925	Conserved
ENSG00000157077_15-9	1	52268463	52303925	ENSG00000157077	1:52268463-52268632	1:52303821-52303925	Conserved
ENSG00000172456_9-8	1	59339958	59346398	ENSG00000172456	1:59339958-59340069	1:59346247-59346398	Conserved
ENSG00000132849_27-26	1	61899583	61901459	ENSG00000132849	1:61899583-61899654	1:61901282-61901459	Conserved
ENSG00000162607_10-8	1	62444738	62448666	ENSG00000162607	1:62444738-62445429	1:62448465-62448666	Conserved
ENSG00000125703_9-6	1	62816575	62821209	ENSG00000125703	1:62816575-62816808	1:62821139-62821209	Conserved
ENSG00000158966_26-24	1	64676895	64679756	ENSG00000158966	1:64676895-64677011	1:64679595-64679756	Conserved
ENSG00000184588_9-6	1	66247460	66266087	ENSG00000184588	1:66247460-66247544	1:66266038-66266087	Conserved
ENSG00000118473_11-7	1	66633070	66643719	ENSG00000118473	1:66633070-66633094	1:66643544-66643719	Conserved
ENSG00000117054_26-22	1	75739980	75750546	ENSG00000117054	1:75739980-75740110	1:75750451-75750546	Conserved
ENSG00000097033_12-4	1	86715724	86735179	ENSG00000097033	1:86715724-86715865	1:86735079-86735179	Conserved
ENSG00000065243_7-3	1	88740988	88771879	ENSG00000065243	1:88740988-88741288	1:88771663-88771879	Conserved
ENSG00000079335_31-27	1	100494818	100499262	ENSG00000079335	1:100494818-100494930	1:100498929-100499262	Conserved
ENSG00000135775_17-11	1	230663141	230671640	ENSG00000135775	1:230663141-230663221	1:230669356-230671640	Conserved
ENSG00000135775_18-11	1	230663141	230675124	ENSG00000135775	1:230663141-230663221	1:230674998-230675124	Conserved
ENSG00000116984_12-10	1	236824119	236826896	ENSG00000116984	1:236824119-236824127	1:236826829-236826896	Conserved
ENSG00000116984_25-22	1	236859833	236863554	ENSG00000116984	1:236859833-236859922	1:236863454-236863554	Conserved
ENSG00000054282_22-13	1	243316755	243426558	ENSG00000054282	1:243316755-243316893	1:243426427-243426558	Conserved
ENSG00000054282_22-18	1	243378721	243426558	ENSG00000054282	1:243378721-243378863	1:243426427-243426558	Conserved
ENSG00000120594_12-8	10	20176999	20219102	ENSG00000120594	10:20176999-20177094	10:20219064-20219102	Conserved
ENSG00000095564_29-26	10	91994535	92008275	ENSG00000095564	10:91994535-91994644	10:92008123-92008275	Conserved
ENSG00000138193_13-12	10	94258800	94259150	ENSG00000138193	10:94258800-94258922	10:94259014-94259150	Conserved
ENSG00000178105_16-13	11	108706739	108723462	ENSG00000178105	11:108706739-108706837	11:108722997-108723462	Conserved
ENSG00000178105_12-4	11	108673467	108693600	ENSG00000178105	11:108673467-108673527	11:108693516-108693600	Conserved
ENSG00000110925_6-6	12	51067673	51067969	ENSG00000110925	12:51067673-51067969	12:51067673-51067969	Conserved
ENSG00000111058_19-16	12	81216901	81233471	ENSG00000111058	12:81216901-81216996	12:81233349-81233471	Conserved
ENSG00000132932_32-31	13	25769046	25774959	ENSG00000132932	13:25769046-25769229	13:25774849-25774959	Conserved
ENSG00000132964_5-3	13	26337567	26353880	ENSG00000132964	13:26337567-26337642	13:26353740-26353880	Conserved
ENSG00000132964_7-3	13	26337567	26385342	ENSG00000132964	13:26337567-26337642	13:26385211-26385342	Conserved
ENSG00000136169_9-6	13	49460107	49467960	ENSG00000136169	13:49460107-49460232	13:49467864-49467960	Conserved
ENSG00000092140_13-9	14	30597420	30602131	ENSG00000092140	14:30597420-30597526	14:30601999-30602131	Conserved
ENSG00000197776_10-7	14	49723874	49729548	ENSG00000197776	14:49723874-49723952	14:49729490-49729548	Conserved
ENSG00000042088_28-20	14	89984516	90019418	ENSG00000042088	14:89984516-89984587	14:90019316-90019418	Conserved
ENSG00000128829_7-3	15	39939505	39955768	ENSG00000128829	15:39939505-39939617	15:39955620-39955768	Conserved
ENSG00000081014_6-4	15	50912078	50915571	ENSG00000081014	15:50912078-50912149	15:50915425-50915571	Conserved
ENSG00000166233_11-3	15	72544820	72572165	ENSG00000166233	15:72544820-72544923	15:72572108-72572165	Conserved
ENSG00000140563_20-17	15	94367605	94385525	ENSG00000140563	15:94367605-94367791	15:94385423-94385525	Conserved
ENSG00000103544_20-16	16	19608178	19616808	ENSG00000103544	16:19608178-19608274	16:19616686-19616808	Conserved
ENSG00000177370_3-2	17	998779	999584	ENSG00000177370	17:998779-998975	17:999512-999584	Conserved
ENSG00000225190_6-6	17	45475100	45475726	ENSG00000225190	17:45475100-45475726	17:45475100-45475726	Conserved
ENSG00000141556_5-2	17	82756165	82768566	ENSG00000141556	17:82756165-82756215	17:82768420-82768566	Conserved
ENSG00000141556_7-2	17	82756165	82781721	ENSG00000141556	17:82756165-82756215	17:82781589-82781721	Conserved
ENSG00000134508_12-10	18	23234608	23237245	ENSG00000134508	18:23234608-23234704	18:23237142-23237245	Conserved
ENSG00000152240_12-9	18	46122467	46124893	ENSG00000152240	18:46122467-46122590	18:46124822-46124893	Conserved
ENSG00000091157_16-13	18	56717964	56758953	ENSG00000091157	18:56717964-56718159	18:56758865-56758953	Conserved
ENSG00000091157_20-17	18	56776782	56816144	ENSG00000091157	18:56776782-56776880	18:56816031-56816144	Conserved
ENSG00000049759_38-35	18	58342906	58357252	ENSG00000049759	18:58342906-58343103	18:58357194-58357252	Conserved
ENSG00000141664_12-7	18	62544802	62560644	ENSG00000141664	18:62544802-62544873	18:62560353-62560644	Conserved
ENSG00000081138_15-7	18	65809704	65862917	ENSG00000081138	18:65809704-65809998	18:65862666-65862917	Conserved
ENSG00000081138_10-7	18	65809704	65824831	ENSG00000081138	18:65809704-65809998	18:65824644-65824831	Conserved
ENSG00000081138_11-7	18	65809704	65844065	ENSG00000081138	18:65809704-65809998	18:65843812-65844065	Conserved
ENSG00000060069_9-7	18	79695225	79697988	ENSG00000060069	18:79695225-79695308	18:79697860-79697988	Conserved
ENSG00000105613_11-9	19	12851934	12852395	ENSG00000105613	19:12851934-12852035	19:12852328-12852395	Conserved
ENSG00000123143_11-10	19	14458031	14458375	ENSG00000123143	19:14458031-14458079	19:14458232-14458375	Conserved
ENSG00000090006_37-17	19	40609746	40614446	ENSG00000090006	19:40609746-40609871	19:40614111-40614446	Conserved
ENSG00000088812_24-21	20	3596377	3604262	ENSG00000088812	20:3596377-3596429	20:3604105-3604262	Conserved
ENSG00000088930_27-2	20	21326279	21368590	ENSG00000088930	20:21326279-21326406	20:21368463-21368590	Conserved
ENSG00000100368_12-11	22	36932765	36933994	ENSG00000100368	22:36932765-36932904	22:36933832-36933994	Conserved
ENSG00000196236_8-6	22	40868999	40882177	ENSG00000196236	22:40868999-40869115	22:40881770-40882177	Conserved
ENSG00000196236_9-6	22	40868999	40886515	ENSG00000196236	22:40868999-40869115	22:40886313-40886515	Conserved
ENSG00000100393_12-8	22	41131388	41141222	ENSG00000100393	22:41131388-41131633	22:41141048-41141222	Conserved
ENSG00000154822_9-4	3	17009674	17014911	ENSG00000154822	3:17009674-17010086	3:17014708-17014911	Conserved
ENSG00000185008_23-14	3	77564954	77602491	ENSG00000185008	3:77564954-77565120	3:77602210-77602491	Conserved
ENSG00000044524_16-8	3	89395837	89431359	ENSG00000044524	3:89395837-89395961	3:89431150-89431359	Conserved
ENSG00000178694_9-6	3	94084107	94095154	ENSG00000178694	3:94084107-94084176	3:94095033-94095154	Conserved
ENSG00000144824_15-12	3	111913319	111920419	ENSG00000144824	3:111913319-111913702	3:111920282-111920419	Conserved
ENSG00000145087_18-11	3	121152477	121240507	ENSG00000145087	3:121152477-121152560	3:121240440-121240507	Conserved
ENSG00000145087_25-23	3	121279805	121318540	ENSG00000145087	3:121279805-121279956	3:121318475-121318540	Conserved
ENSG00000145087_27-26	3	121378716	121381532	ENSG00000145087	3:121378716-121378886	3:121381293-121381532	Conserved
ENSG00000152492_14-10	3	191380159	191389602	ENSG00000152492	3:191380159-191380274	3:191389496-191389602	Conserved
ENSG00000127252_3-2	3	193255651	193263235	ENSG00000127252	3:193255651-193255789	3:193262970-193263235	Conserved
ENSG00000004468_12-9	4	15834217	15840538	ENSG00000004468	4:15834217-15834302	4:15840452-15840538	Conserved
ENSG00000138802_7-5	4	109462901	109481781	ENSG00000138802	4:109462901-109463644	4:109481677-109481781	Conserved
ENSG00000145375_11-7	4	122935714	122979386	ENSG00000145375	4:122935714-122935843	4:122979232-122979386	Conserved
ENSG00000071205_23-8	4	147864846	147966839	ENSG00000071205	4:147864846-147864956	4:147966680-147966839	Conserved
ENSG00000038295_23-18	4	166055076	166078030	ENSG00000038295	4:166055076-166055271	4:166077903-166078030	Conserved
ENSG00000047188_8-6	5	113532879	113535798	ENSG00000047188	5:113532879-113533045	5:113535642-113535798	Conserved
ENSG00000168566_12-9	6	7602623	7606195	ENSG00000168566	6:7602623-7602744	6:7606031-7606195	Conserved
ENSG00000079691_31-14	6	25482257	25556850	ENSG00000079691	6:25482257-25482343	6:25556701-25556850	Conserved
ENSG00000023892_5-4	6	35312302	35312772	ENSG00000023892	6:35312302-35312538	6:35312626-35312772	Conserved
ENSG00000137200_14-9	6	37458612	37463008	ENSG00000137200	6:37458612-37458810	6:37462829-37463008	Conserved
ENSG00000198087_19-15	6	47599301	47612536	ENSG00000198087	6:47599301-47599443	6:47612473-47612536	Conserved
ENSG00000112701_14-9	6	75634707	75663518	ENSG00000112701	6:75634707-75634811	6:75663221-75663518	Conserved
ENSG00000112701_17-9	6	75634707	75670720	ENSG00000112701	6:75634707-75634811	6:75670553-75670720	Conserved
ENSG00000112701_24-9	6	75634707	75678927	ENSG00000112701	6:75634707-75634811	6:75678811-75678927	Conserved
ENSG00000112701_5-4	6	75621532	75623960	ENSG00000112701	6:75621532-75621625	6:75623900-75623960	Conserved
ENSG00000083097_27-20	6	83132176	83142046	ENSG00000083097	6:83132176-83132328	6:83141921-83142046	Conserved
ENSG00000188994_11-7	6	87215903	87233527	ENSG00000188994	6:87215903-87215962	6:87233325-87233527	Conserved
ENSG00000164418_16-9	6	101799648	101928632	ENSG00000164418	6:101799648-101799791	6:101927779-101928632	Conserved
ENSG00000104723_9-5	8	15650697	15673836	ENSG00000104723	8:15650697-15650814	8:15673747-15673836	Conserved
ENSG00000129691_16-15	8	38128291	38128951	ENSG00000129691	8:38128291-38128378	8:38128758-38128951	Conserved
ENSG00000104427_10-6	8	78686467	78715328	ENSG00000104427	8:78686467-78686608	8:78715221-78715328	Conserved
ENSG00000169946_8-7	8	105561363	105634357	ENSG00000169946	8:105561363-105561422	8:105634246-105634357	Conserved
ENSG00000197724_3-2	9	93629970	93636525	ENSG00000197724	9:93629970-93630055	9:93636411-93636525	Conserved
ENSG00000077264_15-13	X	111162915	111173081	ENSG00000077264	X:111162915-111163046	X:111173018-111173081	Conserved
ENSG00000197157_12-10	7	127704839	127721400	ENSG00000197157	7:127704839-127704945	7:127721287-127721400	Conserved
ENSG00000198919_28-20	3	108647943	108672656	ENSG00000198919	3:108647943-108648112	3:108672560-108672656	Conserved
ENSG00000205629_15-11	16	25161102	25170805	ENSG00000205629	16:25161102-25161168	16:25170714-25170805	Conserved
ENSG00000142657_9-8	1	10403071	10404279	ENSG00000142657	1:10403071-10403136	1:10404161-10404279	Conserved
ENSG00000111452_20-4	12	130966463	131014340	ENSG00000111452	12:130966463-130966546	12:131014199-131014340	Conserved
ENSG00000118412_9-6	6	89853166	89857199	ENSG00000118412	6:89853166-89853234	6:89857084-89857199	Conserved
ENSG00000079841_38-37	6	72307258	72313672	ENSG00000079841	6:72307258-72307370	6:72313506-72313672	Conserved
ENSG00000047056_9-5	10	1077907	1086357	ENSG00000047056	10:1077907-1078003	10:1086286-1086357	Conserved
ENSG00000107518_31-5	10	115120185	115519324	ENSG00000107518	10:115120185-115120268	10:115519263-115519324	Conserved
ENSG00000110318_4-3	11	101944265	101948142	ENSG00000110318	11:101944265-101944410	11:101948031-101948142	Conserved
ENSG00000110274_26-25	11	117390777	117391215	ENSG00000110274	11:117390777-117390908	11:117390999-117391215	Conserved
ENSG00000111218_16-11	12	3568706	3583208	ENSG00000111218	12:3568706-3568848	12:3583058-3583208	Conserved
ENSG00000139154_10-5	12	19473248	19518113	ENSG00000139154	12:19473248-19473355	12:19518087-19518113	Conserved
ENSG00000067798_13-6	12	77994803	78059115	ENSG00000067798	12:77994803-77994871	12:78058996-78059115	Conserved
ENSG00000028203_35-34	12	95294272	95296258	ENSG00000028203	12:95294272-95294372	12:95296051-95296258	Conserved
ENSG00000151164_10-8	12	110503806	110506693	ENSG00000151164	12:110503806-110503876	12:110506579-110506693	Conserved
ENSG00000151164_10-9	12	110505617	110506693	ENSG00000151164	12:110505617-110505772	12:110506579-110506693	Conserved
ENSG00000135119_11-9	12	116833792	116836282	ENSG00000135119	12:116833792-116833941	12:116836181-116836282	Conserved
ENSG00000183495_50-36	12	132037682	132055208	ENSG00000183495	12:132037682-132037793	12:132055099-132055208	Conserved
ENSG00000173988_4-3	13	46227512	46228733	ENSG00000173988	13:46227512-46228189	13:46228665-46228733	Conserved
ENSG00000134882_8-7	13	99243832	99244624	ENSG00000134882	13:99243832-99243951	13:99244515-99244624	Conserved
ENSG00000070269_27-8	14	56585001	56636598	ENSG00000070269	14:56585001-56585032	14:56636508-56636598	Conserved
ENSG00000089916_14-10	14	76171843	76176690	ENSG00000089916	14:76171843-76172019	14:76173546-76176690	Conserved
ENSG00000198838_83-78	15	33819756	33825676	ENSG00000198838	15:33819756-33819807	15:33825603-33825676	Conserved
ENSG00000186073_31-24	15	36691685	36709961	ENSG00000186073	15:36691685-36691754	15:36709838-36709961	Conserved
ENSG00000156958_18-13	15	49235851	49292537	ENSG00000156958	15:49235851-49235897	15:49292327-49292537	Conserved
ENSG00000028528_9-7	15	64118117	64118854	ENSG00000028528	15:64118117-64118244	15:64118788-64118854	Conserved
ENSG00000137764_21-11	15	67630888	67703408	ENSG00000137764	15:67630888-67630927	15:67703337-67703408	Conserved
ENSG00000140382_10-8	15	77467095	77471814	ENSG00000140382	15:77467095-77467158	15:77471783-77471814	Conserved
ENSG00000170776_20-19	15	85664563	85669830	ENSG00000170776	15:85664563-85664755	15:85669722-85669830	Conserved
ENSG00000078328_24-19	16	7579777	7607338	ENSG00000078328	16:7579777-7579785	16:7607285-7607338	Conserved
ENSG00000103544_13-11	16	19579052	19591874	ENSG00000103544	16:19579052-19579128	16:19591790-19591874	Conserved
ENSG00000174628_16-13	16	19763848	19788922	ENSG00000174628	16:19763848-19763900	16:19788838-19788922	Conserved
ENSG00000140807_9-5	16	50621602	50632408	ENSG00000140807	16:50621602-50621708	16:50632281-50632408	Conserved
ENSG00000186153_10-8	16	78108423	78115154	ENSG00000186153	16:78108423-78108487	16:78114976-78115154	Conserved
ENSG00000153933_11-7	17	56844019	56848065	ENSG00000153933	17:56844019-56844178	17:56847922-56848065	Conserved
ENSG00000153933_14-12	17	56848696	56856625	ENSG00000153933	17:56848696-56848853	17:56856512-56856625	Conserved
ENSG00000076650_9-6	19	33095762	33101574	ENSG00000076650	19:33095762-33095820	19:33101495-33101574	Conserved
ENSG00000167601_18-17	19	41248514	41248820	ENSG00000167601	19:41248514-41248609	19:41248743-41248820	Conserved
ENSG00000004468_12-5	4	15816511	15840538	ENSG00000004468	4:15816511-15816640	4:15840452-15840538	Conserved
ENSG00000138698_21-15	4	98404477	98421394	ENSG00000138698	4:98404477-98404586	4:98421255-98421394	Conserved
ENSG00000109320_14-13	4	102580535	102582957	ENSG00000109320	4:102580535-102580588	4:102582866-102582957	Conserved
ENSG00000071205_25-18	4	147939825	148047051	ENSG00000071205	4:147939825-147939899	4:148046892-148047051	Conserved
ENSG00000164306_16-12	4	184665917	184682336	ENSG00000164306	4:184665917-184666064	4:184682248-184682336	Conserved
ENSG00000151422_15-10	5	108867767	108897848	ENSG00000151422	5:108867767-108867950	5:108897648-108897848	Conserved
ENSG00000185274_7-6	7	71415889	71421105	ENSG00000185274	7:71415889-71415931	7:71420908-71421105	Conserved
ENSG00000078668_13-8	8	42398712	42403461	ENSG00000078668	8:42398712-42398864	8:42403032-42403461	Conserved
ENSG00000046889_9-6	8	68022036	68038292	ENSG00000046889	8:68022036-68022140	8:68038159-68038292	Conserved
ENSG00000176406_40-23	8	103931263	104148848	ENSG00000176406	8:103931263-103931393	8:104148607-104148848	Conserved
ENSG00000131773_10-2	8	135521237	135607037	ENSG00000131773	8:135521237-135521355	8:135606955-135607037	Conserved
ENSG00000204764_43-35	5	171170130	171221840	ENSG00000204764	5:171170130-171170203	5:171221758-171221840	Conserved
ENSG00000204764_43-39	5	171199670	171221840	ENSG00000204764	5:171199670-171199773	5:171221758-171221840	Conserved
ENSG00000204764_45-35	5	171170130	171242820	ENSG00000204764	5:171170130-171170203	5:171242682-171242820	Conserved
ENSG00000205189_9-6	8	80499494	80518954	ENSG00000205189	8:80499494-80500382	8:80518782-80518954	Conserved
ENSG00000168172_17-7	8	42950388	42997637	ENSG00000168172	8:42950388-42950455	8:42997550-42997637	Conserved
ENSG00000168172_6-3	8	42906173	42943445	ENSG00000168172	8:42906173-42906258	8:42943313-42943445	Conserved
ENSG00000168172_6-4	8	42925557	42943445	ENSG00000168172	8:42925557-42925629	8:42943313-42943445	Conserved
ENSG00000054523_51-49	1	10363283	10365648	ENSG00000054523	1:10363283-10363344	1:10365166-10365648	Conserved
ENSG00000048707_84-81	1	12455998	12460396	ENSG00000048707	1:12455998-12456071	1:12460201-12460396	Conserved
ENSG00000116786_8-5	1	15717893	15721388	ENSG00000116786	1:15717893-15717992	1:15721329-15721388	Conserved
ENSG00000117682_24-23	1	26457791	26460144	ENSG00000117682	1:26457791-26457905	1:26460037-26460144	Conserved
ENSG00000180098_13-9	1	28560633	28561398	ENSG00000180098	1:28560633-28561398	1:28560633-28561398	Conserved
ENSG00000126070_18-13	1	36004341	36014048	ENSG00000126070	1:36004341-36004475	1:36013915-36014048	Conserved
ENSG00000084073_6-3	1	40267786	40272035	ENSG00000084073	1:40267786-40267836	1:40271894-40272035	Conserved
ENSG00000132849_39-34	1	61990168	62084648	ENSG00000132849	1:61990168-61990364	1:62084515-62084648	Conserved
ENSG00000162437_6-2	1	64768656	64789514	ENSG00000162437	1:64768656-64768722	1:64789388-64789514	Conserved
ENSG00000033122_28-26	1	70053026	70089819	ENSG00000033122	1:70053026-70053145	1:70089727-70089819	Conserved
ENSG00000033122_29-26	1	70053026	70107826	ENSG00000033122	1:70053026-70053145	1:70107750-70107826	Conserved
ENSG00000180488_14-10	1	77801331	77815231	ENSG00000180488	1:77801331-77801508	1:77815108-77815231	Conserved
ENSG00000097033_7-4	1	86715724	86724405	ENSG00000097033	1:86715724-86715865	1:86724313-86724405	Conserved
ENSG00000065243_9-5	1	88770352	88786213	ENSG00000065243	1:88770352-88770469	1:88786104-88786213	Conserved
ENSG00000065243_7-5	1	88770352	88771879	ENSG00000065243	1:88770352-88770469	1:88771663-88771879	Conserved
ENSG00000189195_20-18	1	92177811	92182595	ENSG00000189195	1:92177811-92177898	1:92180265-92182595	Conserved
ENSG00000162695_9-4	1	100906852	100921841	ENSG00000162695	1:100906852-100906965	1:100921706-100921841	Conserved
ENSG00000163125_10-5	1	150440923	150446401	ENSG00000163125	1:150440923-150441023	1:150446226-150446401	Conserved
ENSG00000143569_10-8	1	154234591	154235291	ENSG00000143569	1:154234591-154234738	1:154235196-154235291	Conserved
ENSG00000133103_21-17	13	39719236	39727548	ENSG00000133103	13:39719236-39719367	13:39727469-39727548	Conserved
ENSG00000100852_6-4	14	32090502	32117287	ENSG00000100852	14:32090502-32090780	14:32117140-32117287	Conserved
ENSG00000197776_8-3	14	49709159	49725769	ENSG00000197776	14:49709159-49709229	14:49725608-49725769	Conserved
ENSG00000166734_12-7	15	44331988	44380976	ENSG00000166734	15:44331988-44332059	15:44380806-44380976	Conserved
ENSG00000168234_7-5	18	24064140	24069271	ENSG00000168234	18:24064140-24064188	18:24069157-24069271	Conserved
ENSG00000150477_21-20	18	37160200	37173081	ENSG00000150477	18:37160200-37160381	18:37172973-37173081	Conserved
ENSG00000152240_11-6	18	46118181	46123364	ENSG00000152240	18:46118181-46118316	18:46123181-46123364	Conserved
ENSG00000049759_38-36	18	58349537	58357252	ENSG00000049759	18:58349537-58349614	18:58357194-58357252	Conserved
ENSG00000081913_6-2	18	62830035	62860601	ENSG00000081913	18:62830035-62830231	18:62860435-62860601	Conserved
ENSG00000060069_10-7	18	79695225	79704917	ENSG00000060069	18:79695225-79695308	18:79704767-79704917	Conserved
ENSG00000141905_12-8	19	3425106	3435207	ENSG00000141905	19:3425106-3425147	19:3435046-3435207	Conserved
ENSG00000088930_27-25	20	21365421	21368590	ENSG00000088930	20:21365421-21365489	20:21368463-21368590	Conserved
ENSG00000099968_14-10	22	17683214	17702386	ENSG00000099968	22:17683214-17683321	22:17702243-17702386	Conserved
ENSG00000182541_11-7	22	31258291	31260077	ENSG00000182541	22:31258291-31258426	22:31259889-31260077	Conserved
ENSG00000196236_9-8	22	40881770	40886515	ENSG00000196236	22:40881770-40881924	22:40886313-40886515	Conserved
ENSG00000100393_35-34	22	41172499	41173784	ENSG00000100393	22:41172499-41172663	22:41173623-41173784	Conserved
ENSG00000130638_6-3	22	45689712	45702847	ENSG00000130638	22:45689712-45689903	22:45702689-45702847	Conserved
ENSG00000065491_7-3	6	37279304	37287072	ENSG00000065491	6:37279304-37279611	6:37287007-37287072	Conserved
ENSG00000135298_31-27	6	69338916	69361512	ENSG00000135298	6:69338916-69339014	6:69360869-69361512	Conserved
ENSG00000082269_17-8	6	70475410	70502791	ENSG00000082269	6:70475410-70475549	6:70502636-70502791	Conserved
ENSG00000112701_24-13	6	75659262	75678927	ENSG00000112701	6:75659262-75659407	6:75678811-75678927	Conserved
ENSG00000112701_9-4	6	75621532	75634811	ENSG00000112701	6:75621532-75621625	6:75634707-75634811	Conserved
ENSG00000188994_9-7	6	87215903	87218731	ENSG00000188994	6:87215903-87215962	6:87218596-87218731	Conserved
ENSG00000135336_18-8	6	87601784	87636486	ENSG00000135336	6:87601784-87601881	6:87636407-87636486	Conserved
ENSG00000164418_11-9	6	101799648	101818483	ENSG00000164418	6:101799648-101799791	6:101818370-101818483	Conserved
ENSG00000130023_14-8	6	169759838	169769713	ENSG00000130023	6:169759838-169759857	6:169769540-169769713	Conserved
ENSG00000130023_14-10	6	169762429	169769713	ENSG00000130023	6:169762429-169762531	6:169769540-169769713	Conserved
ENSG00000204138_15-13	1	28473554	28480604	ENSG00000204138	1:28473554-28474151	1:28480451-28480604	Conserved
ENSG00000079841_6-5	6	72179575	72183149	ENSG00000079841	6:72179575-72179915	6:72182284-72183149	Conserved
ENSG00000079841_39-33	6	72284047	72333835	ENSG00000079841	6:72284047-72284118	6:72333600-72333835	Conserved
ENSG00000079841_39-37	6	72307258	72333835	ENSG00000079841	6:72307258-72307370	6:72333600-72333835	Conserved
ENSG00000047056_14-8	10	1084403	1105267	ENSG00000047056	10:1084403-1084538	10:1105126-1105267	Conserved
ENSG00000078403_31-29	10	21713772	21727928	ENSG00000078403	10:21713772-21713922	10:21727856-21727928	Conserved
ENSG00000172671_16-16	10	45625951	45627105	ENSG00000172671	10:45625951-45627105	10:45625951-45627105	Conserved
ENSG00000138190_27-4	10	92893349	93014267	ENSG00000138190	10:92893349-92893520	10:93014194-93014267	Conserved
ENSG00000148843_32-31	10	103438015	103438808	ENSG00000148843	10:103438015-103438071	10:103438686-103438808	Conserved
ENSG00000148843_35-33	10	103439746	103440850	ENSG00000148843	10:103439746-103439868	10:103440734-103440850	Conserved
ENSG00000107518_30-28	10	115461941	115469329	ENSG00000107518	10:115461941-115462016	10:115469172-115469329	Conserved
ENSG00000187240_83-77	11	103303093	103323990	ENSG00000187240	11:103303093-103303253	11:103323886-103323990	Conserved
ENSG00000187240_84-77	11	103303093	103358359	ENSG00000187240	11:103303093-103303253	11:103358243-103358359	Conserved
ENSG00000187240_86-77	11	103303093	103436032	ENSG00000187240	11:103303093-103303253	11:103435943-103436032	Conserved
ENSG00000178105_16-14	11	108715879	108723462	ENSG00000178105	11:108715879-108715966	11:108722997-108723462	Conserved
ENSG00000167257_11-10	11	117279908	117280259	ENSG00000167257	11:117279908-117280004	11:117280171-117280259	Conserved
ENSG00000186815_12-10	12	113267843	113269845	ENSG00000186815	12:113267843-113267879	12:113269757-113269845	Conserved
ENSG00000022840_6-5	12	120557282	120557682	ENSG00000022840	12:120557282-120557368	12:120557544-120557682	Conserved
ENSG00000132932_35-33	13	25828118	25839624	ENSG00000132932	13:25828118-25828192	13:25839546-25839624	Conserved
ENSG00000152520_9-7	13	28256292	28261458	ENSG00000152520	13:28256292-28256539	13:28261401-28261458	Conserved
ENSG00000073910_48-18	13	32131672	32225036	ENSG00000073910	13:32131672-32131840	13:32224933-32225036	Conserved
ENSG00000133103_21-15	13	39694634	39727548	ENSG00000133103	13:39694634-39694725	13:39727469-39727548	Conserved
ENSG00000197776_14-3	14	49709159	49743805	ENSG00000197776	14:49709159-49709229	14:49743753-49743805	Conserved
ENSG00000100485_17-17	14	50150008	50150230	ENSG00000100485	14:50150008-50150230	14:50150008-50150230	Conserved
ENSG00000119636_7-4	14	74029184	74040645	ENSG00000119636	14:74029184-74029249	14:74040565-74040645	Conserved
ENSG00000042088_27-20	14	89984516	89993483	ENSG00000042088	14:89984516-89984587	14:89993376-89993483	Conserved
ENSG00000089902_11-8	14	102714423	102721377	ENSG00000089902	14:102714423-102714452	14:102721320-102721377	Conserved
ENSG00000137842_14-5	15	43135512	43160794	ENSG00000137842	15:43135512-43135649	15:43160323-43160794	Conserved
ENSG00000166734_12-6	15	44328685	44380976	ENSG00000166734	15:44328685-44328787	15:44380806-44380976	Conserved
ENSG00000137764_18-11	15	67630888	67664645	ENSG00000137764	15:67630888-67630927	15:67664597-67664645	Conserved
ENSG00000137764_21-15	15	67646231	67703408	ENSG00000137764	15:67646231-67646299	15:67703337-67703408	Conserved
ENSG00000137764_24-18	15	67664597	67748601	ENSG00000137764	15:67664597-67664645	15:67748368-67748601	Conserved
ENSG00000137764_24-19	15	67692479	67748601	ENSG00000137764	15:67692479-67692552	15:67748368-67748601	Conserved
ENSG00000145819_21-17	5	143037196	143057747	ENSG00000145819	5:143037196-143037223	5:143057642-143057747	Conserved
ENSG00000170085_15-14	5	176322273	176324757	ENSG00000170085	5:176322273-176322425	5:176324629-176324757	Conserved
ENSG00000164808_32-29	8	47700403	47702015	ENSG00000164808	8:47700403-47700490	8:47701956-47702015	Conserved
ENSG00000169891_20-16	X	17103718	17138961	ENSG00000169891	X:17103718-17103779	X:17135694-17138961	Conserved
ENSG00000169891_20-17	X	17133824	17138961	ENSG00000169891	X:17133824-17133907	X:17135694-17138961	Conserved
ENSG00000086717_10-8	X	18749792	18761576	ENSG00000086717	X:18749792-18749952	X:18761530-18761576	Conserved
ENSG00000149970_53-45	X	21516485	21563452	ENSG00000149970	X:21516485-21516631	X:21563238-21563452	Conserved
ENSG00000101868_26-2	X	24699425	24748992	ENSG00000101868	X:24699425-24699549	X:24748870-24748992	Conserved
ENSG00000077264_15-8	X	111142096	111173081	ENSG00000077264	X:111142096-111142196	X:111173018-111173081	Conserved
ENSG00000171100_14-7	X	150638943	150663609	ENSG00000171100	X:150638943-150639021	X:150663433-150663609	Conserved
ENSG00000171100_6-2	X	150592605	150619139	ENSG00000171100	X:150592605-150592677	X:150619038-150619139	Conserved
ENSG00000054523_51-50	1	10365100	10365648	ENSG00000054523	1:10365100-10365245	1:10365166-10365648	Conserved
ENSG00000009780_8-7	1	27732603	27734183	ENSG00000009780	1:27732603-27732657	1:27734031-27734183	Conserved
ENSG00000146463_32-31	1	35413972	35415714	ENSG00000146463	1:35413972-35414083	1:35415466-35415714	Conserved
ENSG00000126070_9-7	1	35966955	35973511	ENSG00000126070	1:35966955-35967075	1:35973375-35973511	Conserved
ENSG00000120549_23-19	10	24527936	24536893	ENSG00000120549	10:24527936-24527942	10:24536774-24536893	Conserved
ENSG00000107882_10-6	10	102592582	102599544	ENSG00000107882	10:102592582-102592724	10:102599433-102599544	Conserved
ENSG00000151553_15-3	10	114830852	114848737	ENSG00000151553	10:114830852-114830930	10:114848647-114848737	Conserved
ENSG00000122970_8-7	12	110128950	110132636	ENSG00000122970	12:110128950-110129130	12:110132547-110132636	Conserved
ENSG00000151948_11-5	12	128888639	128927154	ENSG00000151948	12:128888639-128888744	12:128927105-128927154	Conserved
ENSG00000132932_27-9	13	25537988	25589699	ENSG00000132932	13:25537988-25538061	13:25589635-25589699	Conserved
ENSG00000172766_7-6	13	41318806	41320824	ENSG00000172766	13:41318806-41318910	13:41320667-41320824	Conserved
ENSG00000151338_21-18	14	37285318	37369624	ENSG00000151338	14:37285318-37285447	14:37369517-37369624	Conserved
ENSG00000032219_12-10	14	58318542	58323617	ENSG00000032219	14:58318542-58318621	14:58323485-58323617	Conserved
ENSG00000100578_23-22	14	58467735	58470723	ENSG00000100578	14:58467735-58467922	14:58470613-58470723	Conserved
ENSG00000069943_9-4	15	55327531	55341802	ENSG00000069943	15:55327531-55327635	15:55341738-55341802	Conserved
ENSG00000047578_5-3	16	27618425	27631162	ENSG00000047578	16:27618425-27618501	16:27631065-27631162	Conserved
ENSG00000132478_12-9	17	75812112	75813878	ENSG00000132478	17:75812112-75812288	17:75813761-75813878	Conserved
ENSG00000078687_4-3	17	78067757	78071165	ENSG00000078687	17:78067757-78067910	17:78071085-78071165	Conserved
ENSG00000141449_8-6	18	21395385	21403994	ENSG00000141449	18:21395385-21395561	18:21403872-21403994	Conserved
ENSG00000187323_27-25	18	53305578	53339907	ENSG00000187323	18:53305578-53305719	18:53339713-53339907	Conserved
ENSG00000091157_16-14	18	56731383	56758953	ENSG00000091157	18:56731383-56731597	18:56758865-56758953	Conserved
ENSG00000091157_26-24	18	56938533	56962529	ENSG00000091157	18:56938533-56938680	18:56962430-56962529	Conserved
ENSG00000081913_14-13	18	62941718	62945271	ENSG00000081913	18:62941718-62941910	18:62945109-62945271	Conserved
ENSG00000215421_9-6	18	74877197	74920692	ENSG00000215421	18:74877197-74877363	18:74920514-74920692	Conserved
ENSG00000149474_13-11	20	18159084	18162945	ENSG00000149474	20:18159084-18159265	20:18162377-18162945	Conserved
ENSG00000100154_8-8	22	28163092	28163599	ENSG00000100154	22:28163092-28163599	22:28163092-28163599	Conserved
ENSG00000100403_15-14	22	41342529	41343576	ENSG00000100403	22:41342529-41342628	22:41343415-41343576	Conserved
ENSG00000186951_22-22	22	46231792	46232239	ENSG00000186951	22:46231792-46232239	22:46231792-46232239	Conserved
ENSG00000183960_7-5	3	19342587	19347965	ENSG00000183960	3:19342587-19342714	3:19347721-19347965	Conserved
ENSG00000146147_16-10	6	54149056	54202233	ENSG00000146147	6:54149056-54149127	6:54202105-54202233	Conserved
ENSG00000146147_7-6	6	54121447	54124865	ENSG00000146147	6:54121447-54121602	6:54124473-54124865	Conserved
ENSG00000112584_12-9	6	170358226	170395579	ENSG00000112584	6:170358226-170358318	6:170395487-170395579	Conserved
ENSG00000147481_37-34	8	50502778	50553179	ENSG00000147481	8:50502778-50502880	8:50553050-50553179	Conserved
ENSG00000185483_8-6	1	64137369	64142650	ENSG00000185483	1:64137369-64137496	1:64142405-64142650	Conserved
ENSG00000162415_2-2	1	45087881	45088237	ENSG00000162415	1:45087881-45088237	1:45087881-45088237	Conserved
ENSG00000162631_7-7	1	107324282	107324922	ENSG00000162631	1:107324282-107324922	1:107324282-107324922	Conserved
ENSG00000116539_5-5	1	155438327	155439068	ENSG00000116539	1:155438327-155439068	1:155438327-155439068	Conserved
ENSG00000187522_10-4	10	14848609	14855943	ENSG00000187522	10:14848609-14848657	10:14855841-14855943	Conserved
ENSG00000120549_15-12	10	24494500	24513434	ENSG00000120549	10:24494500-24494604	10:24513259-24513434	Conserved
ENSG00000082805_24-19	12	1180540	1204512	ENSG00000082805	12:1180540-1180677	12:1204501-1204512	Conserved
ENSG00000151067_11-9	12	2504436	2512984	ENSG00000151067	12:2504436-2504539	12:2512812-2512984	Conserved
ENSG00000067798_13-11	12	78049993	78059115	ENSG00000067798	12:78049993-78050007	12:78058996-78059115	Conserved
ENSG00000136040_9-5	12	94209590	94227235	ENSG00000136040	12:94209590-94209629	12:94227149-94227235	Conserved
ENSG00000120868_22-19	12	98677425	98686873	ENSG00000120868	12:98677425-98677551	12:98686748-98686873	Conserved
ENSG00000151572_9-7	12	100922226	100942535	ENSG00000151572	12:100922226-100922330	12:100942377-100942535	Conserved
ENSG00000111785_13-10	12	106842589	106860412	ENSG00000111785	12:106842589-106842817	12:106860268-106860412	Conserved
ENSG00000125266_4-4	13	106512529	106512812	ENSG00000125266	13:106512529-106512812	13:106512529-106512812	Conserved
ENSG00000102606_12-9	13	111205289	111233293	ENSG00000102606	13:111205289-111205373	13:111233205-111233293	Conserved
ENSG00000033170_17-14	14	65615978	65629606	ENSG00000033170	14:65615978-65616093	14:65629492-65629606	Conserved
ENSG00000081177_12-11	14	69228816	69230598	ENSG00000081177	14:69228816-69229072	14:69230472-69230598	Conserved
ENSG00000103489_3-3	16	17258988	17259498	ENSG00000103489	16:17258988-17259498	16:17258988-17259498	Conserved
ENSG00000102893_21-7	16	47497399	47596531	ENSG00000102893	16:47497399-47497488	16:47596373-47596531	Conserved
ENSG00000102893_23-7	16	47497399	47610920	ENSG00000102893	16:47497399-47497488	16:47610826-47610920	Conserved
ENSG00000102893_11-7	16	47497399	47515601	ENSG00000102893	16:47497399-47497488	16:47515521-47515601	Conserved
ENSG00000102910_13-10	16	48277338	48303305	ENSG00000102910	16:48277338-48277479	16:48303172-48303305	Conserved
ENSG00000146872_17-12	17	62552302	62565137	ENSG00000146872	17:62552302-62552339	17:62565001-62565137	Conserved
ENSG00000099783_10-6	19	8455405	8463686	ENSG00000099783	19:8455405-8455574	19:8463593-8463686	Conserved
ENSG00000257923_32-32	7	102227367	102227669	ENSG00000257923	7:102227367-102227669	7:102227367-102227669	Conserved
ENSG00000157168_11-7	8	32595828	32616885	ENSG00000157168	8:32595828-32596005	8:32616835-32616885	Conserved
ENSG00000137574_13-3	8	55782748	55805036	ENSG00000137574	8:55782748-55782812	8:55804893-55805036	Conserved
ENSG00000137574_9-3	8	55782748	55796152	ENSG00000137574	8:55782748-55782812	8:55795978-55796152	Conserved
ENSG00000104218_17-11	8	67103037	67116122	ENSG00000104218	8:67103037-67103135	8:67115914-67116122	Conserved
ENSG00000104218_17-12	8	67105905	67116122	ENSG00000104218	8:67105905-67105975	8:67115914-67116122	Conserved
ENSG00000104218_22-18	8	67118248	67137603	ENSG00000104218	8:67118248-67118369	8:67137456-67137603	Conserved
ENSG00000104218_22-21	8	67131951	67137603	ENSG00000104218	8:67131951-67132080	8:67137456-67137603	Conserved
ENSG00000139372_11-6	12	103976918	103980962	ENSG00000139372	12:103976918-103977060	12:103980893-103980962	Conserved
ENSG00000158636_19-13	11	76458183	76464080	ENSG00000158636	11:76458183-76461015	11:76463821-76464080	Conserved
ENSG00000158636_20-19	11	76463821	76472840	ENSG00000158636	11:76463821-76464080	11:76472564-76472840	Conserved
ENSG00000158636_28-23	11	76513386	76528466	ENSG00000158636	11:76513386-76513535	11:76528268-76528466	Conserved
ENSG00000166004_22-17	11	93696320	93702919	ENSG00000166004	11:93696320-93696417	11:93702776-93702919	Conserved
ENSG00000166004_23-17	11	93696320	93706897	ENSG00000166004	11:93696320-93696417	11:93706745-93706897	Conserved
ENSG00000171681_17-16	12	14456561	14457295	ENSG00000171681	12:14456561-14456634	12:14457207-14457295	Conserved
ENSG00000139154_5-4	12	19462510	19473355	ENSG00000139154	12:19462510-19462717	12:19473248-19473355	Conserved
ENSG00000067798_9-4	12	77966229	78021862	ENSG00000067798	12:77966229-77966301	12:78021747-78021862	Conserved
ENSG00000111783_7-5	12	106608797	106654351	ENSG00000111783	12:106608797-106608883	12:106654228-106654351	Conserved
ENSG00000136141_23-21	13	46723221	46733998	ENSG00000136141	13:46723221-46723330	13:46733921-46733998	Conserved
ENSG00000083544_11-7	13	60439688	60467379	ENSG00000083544	13:60439688-60439772	13:60467238-60467379	Conserved
ENSG00000167972_12-12	16	2319581	2319840	ENSG00000167972	16:2319581-2319840	16:2319581-2319840	Conserved
ENSG00000038532_9-4	16	10969161	10982991	ENSG00000038532	16:10969161-10969309	16:10982878-10982991	Conserved
ENSG00000038532_22-11	16	11020193	11051641	ENSG00000038532	16:11020193-11020325	16:11051513-11051641	Conserved
ENSG00000038532_23-11	16	11020193	11061022	ENSG00000038532	16:11020193-11020325	16:11060902-11061022	Conserved
ENSG00000103222_32-31	16	16124789	16125911	ENSG00000103222	16:16124789-16124915	16:16125810-16125911	Conserved
ENSG00000155666_16-14	16	27213585	27215008	ENSG00000155666	16:27213585-27213642	16:27214576-27215008	Conserved
ENSG00000103479_6-4	16	53442658	53447106	ENSG00000103479	16:53442658-53442858	16:53447042-53447106	Conserved
ENSG00000146872_14-12	17	62552302	62553755	ENSG00000146872	17:62552302-62552339	17:62553444-62553755	Conserved
ENSG00000076650_9-2	19	33088134	33101574	ENSG00000076650	19:33088134-33088268	19:33101495-33101574	Conserved
ENSG00000166398_9-6	19	34327421	34330347	ENSG00000166398	19:34327421-34327561	19:34330189-34330347	Conserved
ENSG00000181722_26-26	3	114350274	114351878	ENSG00000181722	3:114350274-114351878	3:114350274-114351878	Conserved
ENSG00000125386_15-9	4	2657803	2672372	ENSG00000125386	4:2657803-2657880	4:2672121-2672372	Conserved
ENSG00000197386_6-2	4	3086939	3107423	ENSG00000197386	4:3086939-3087022	4:3107285-3107423	Conserved
ENSG00000174473_13-10	4	172229656	172348689	ENSG00000174473	4:172229656-172229764	4:172348523-172348689	Conserved
ENSG00000145819_13-7	5	142885298	142932125	ENSG00000145819	5:142885298-142885399	5:142932047-142932125	Conserved
ENSG00000134014_22-19	8	28155942	28162078	ENSG00000134014	8:28155942-28156032	8:28161997-28162078	Conserved
ENSG00000147421_13-11	8	28980071	29018913	ENSG00000147421	8:28980071-28980156	8:29018760-29018913	Conserved
ENSG00000104218_22-13	8	67111972	67137603	ENSG00000104218	8:67111972-67112065	8:67137456-67137603	Conserved
ENSG00000147251_6-2	X	118542725	118546116	ENSG00000147251	X:118542725-118542841	X:118546021-118546116	Conserved
ENSG00000166575_9-7	11	87067694	87091395	ENSG00000166575	11:87067694-87067821	11:87091362-87091395	Conserved
ENSG00000136738_12-10	10	17704431	17705741	ENSG00000136738	10:17704431-17704518	10:17705588-17705741	Conserved
ENSG00000107518_31-28	10	115461941	115519324	ENSG00000107518	10:115461941-115462016	10:115519263-115519324	Conserved
ENSG00000107518_32-5	10	115120185	115549536	ENSG00000107518	10:115120185-115120268	10:115549458-115549536	Conserved
ENSG00000109944_13-12	11	122956496	122957491	ENSG00000109944	11:122956496-122956576	11:122957363-122957491	Conserved
ENSG00000083642_28-27	13	32732101	32735330	ENSG00000083642	13:32732101-32732224	13:32735172-32735330	Conserved
ENSG00000172766_12-6	13	41318806	41336756	ENSG00000172766	13:41318806-41318910	13:41336650-41336756	Conserved
ENSG00000072415_13-4	14	67269701	67303599	ENSG00000072415	14:67269701-67269764	14:67303522-67303599	Conserved
ENSG00000137764_21-18	15	67664597	67703408	ENSG00000137764	15:67664597-67664645	15:67703337-67703408	Conserved
ENSG00000137764_26-18	15	67664597	67772752	ENSG00000137764	15:67664597-67664645	15:67772707-67772752	Conserved
ENSG00000102858_17-15	16	4671391	4677572	ENSG00000102858	16:4671391-4671459	16:4677463-4677572	Conserved
ENSG00000103047_9-7	16	68875154	68880630	ENSG00000103047	16:68875154-68875290	16:68880548-68880630	Conserved
ENSG00000167280_4-3	17	79077430	79077864	ENSG00000167280	17:79077430-79077497	17:79077663-79077864	Conserved
ENSG00000160410_22-21	19	40583398	40583717	ENSG00000160410	19:40583398-40583485	19:40583601-40583717	Conserved
ENSG00000177463_16-15	3	15032379	15034809	ENSG00000177463	3:15032379-15032500	3:15034324-15034809	Conserved
ENSG00000055163_44-42	5	157359005	157361598	ENSG00000055163	5:157359005-157359148	5:157361405-157361598	Conserved
ENSG00000157110_11-7	8	30474779	30504436	ENSG00000157110	8:30474779-30474816	8:30504286-30504436	Conserved
ENSG00000147481_34-28	8	50438543	50502880	ENSG00000147481	8:50438543-50438599	8:50502778-50502880	Conserved
ENSG00000046889_13-9	8	68038159	68060779	ENSG00000046889	8:68038159-68038292	8:68060679-68060779	Conserved
ENSG00000148120_8-6	9	94773002	94801002	ENSG00000148120	9:94773002-94773168	9:94800757-94801002	Conserved
ENSG00000130956_5-3	9	96458379	96465778	ENSG00000130956	9:96458379-96458541	9:96465710-96465778	Conserved
ENSG00000165240_23-20	X	78012879	78020398	ENSG00000165240	X:78012879-78013112	X:78020244-78020398	Conserved
ENSG00000168172_23-20	8	43007847	43013400	ENSG00000168172	8:43007847-43007929	8:43013329-43013400	Conserved
ENSG00000009780_11-10	1	27749068	27755330	ENSG00000009780	1:27749068-27749154	1:27755195-27755330	Conserved
ENSG00000117751_9-8	1	27841014	27843330	ENSG00000117751	1:27841014-27841234	1:27843186-27843330	Conserved
ENSG00000143674_10-2	1	233346442	233376527	ENSG00000143674	1:233346442-233346622	1:233376430-233376527	Conserved
ENSG00000158636_20-8	11	76451858	76472840	ENSG00000158636	11:76451858-76451957	11:76472564-76472840	Conserved
ENSG00000137766_9-3	15	54293895	54338489	ENSG00000137766	15:54293895-54294064	15:54338361-54338489	Conserved
ENSG00000048471_11-10	16	12199601	12278036	ENSG00000048471	16:12199601-12199683	16:12277933-12278036	Conserved
ENSG00000044524_18-11	3	89407269	89450370	ENSG00000044524	3:89407269-89407371	3:89450177-89450370	Conserved
ENSG00000169379_9-7	3	93995874	94003908	ENSG00000169379	3:93995874-93995944	3:94003659-94003908	Conserved
ENSG00000065485_12-10	3	123124066	123130616	ENSG00000065485	3:123124066-123124157	3:123130480-123130616	Conserved
ENSG00000121542_7-4	3	123223559	123259589	ENSG00000121542	3:123223559-123223722	3:123259524-123259589	Conserved
ENSG00000109680_15-7	4	26637211	26688407	ENSG00000109680	4:26637211-26637285	4:26688345-26688407	Conserved
ENSG00000065882_23-14	4	38027788	38054338	ENSG00000065882	4:38027788-38027879	4:38054199-38054338	Conserved
ENSG00000038427_14-14	5	83519349	83522309	ENSG00000038427	5:83519349-83522309	5:83519349-83522309	Conserved
ENSG00000112624_12-11	6	42852092	42853738	ENSG00000112624	6:42852092-42852197	6:42853638-42853738	Conserved
ENSG00000099139_6-3	9	75932379	76027037	ENSG00000099139	9:75932379-75932483	9:76026961-76027037	Conserved
ENSG00000165704_6-2	X	134473359	134493590	ENSG00000165704	X:134473359-134473465	X:134493508-134493590	Conserved
ENSG00000165704_8-2	X	134473359	134498684	ENSG00000165704	X:134473359-134473465	X:134498608-134498684	Conserved
ENSG00000102543_15-12	13	49274291	49286282	ENSG00000102543	13:49274291-49274340	13:49286222-49286282	Conserved
ENSG00000072415_7-4	14	67269701	67279537	ENSG00000072415	14:67269701-67269764	14:67279018-67279537	Conserved
ENSG00000140577_11-6	15	90593636	90607478	ENSG00000140577	15:90593636-90593755	15:90607378-90607478	Conserved
ENSG00000078328_18-18	16	7518147	7518389	ENSG00000078328	16:7518147-7518389	16:7518147-7518389	Conserved
ENSG00000038532_27-11	16	11020193	11126146	ENSG00000038532	16:11020193-11020325	16:11125979-11126146	Conserved
ENSG00000038532_27-24	16	11120615	11126146	ENSG00000038532	16:11120615-11120766	16:11125979-11126146	Conserved
ENSG00000103540_22-10	16	19535940	19548600	ENSG00000103540	16:19535940-19536197	16:19547732-19548600	Conserved
ENSG00000070366_15-15	17	2172658	2172859	ENSG00000070366	17:2172658-2172859	17:2172658-2172859	Conserved
ENSG00000166263_22-19	17	55072900	55081183	ENSG00000166263	17:55072900-55073076	17:55081050-55081183	Conserved
ENSG00000089351_25-24	19	35019191	35019533	ENSG00000089351	19:35019191-35019309	19:35019391-35019533	Conserved
ENSG00000109680_17-6	4	26620613	26720125	ENSG00000109680	4:26620613-26620667	4:26720081-26720125	Conserved
ENSG00000129116_14-13	4	168709028	168711923	ENSG00000129116	4:168709028-168709147	4:168711581-168711923	Conserved
ENSG00000146555_24-20	7	4049348	4079584	ENSG00000146555	7:4049348-4049463	7:4079463-4079584	Conserved
ENSG00000146555_24-23	7	4076998	4079584	ENSG00000146555	7:4076998-4077189	7:4079463-4079584	Conserved
ENSG00000166575_8-7	11	87067694	87071615	ENSG00000166575	11:87067694-87067821	11:87071517-87071615	Conserved
ENSG00000165338_7-5	10	91460427	91462184	ENSG00000165338	10:91460427-91460549	10:91462095-91462184	Conserved
ENSG00000138190_24-4	10	92893349	92974232	ENSG00000138190	10:92893349-92893520	10:92974053-92974232	Conserved
ENSG00000150760_11-3	10	126970702	127000307	ENSG00000150760	10:126970702-126970785	10:127000172-127000307	Conserved
ENSG00000152520_4-2	13	28174272	28177935	ENSG00000152520	13:28174272-28174393	13:28177865-28177935	Conserved
ENSG00000152520_6-2	13	28174272	28220378	ENSG00000152520	13:28174272-28174393	13:28220231-28220378	Conserved
ENSG00000119661_10-8	14	73671542	73689515	ENSG00000119661	14:73671542-73671597	14:73689375-73689515	Conserved
ENSG00000119685_23-14	14	75707018	75735289	ENSG00000119685	14:75707018-75707087	14:75735195-75735289	Conserved
ENSG00000164066_15-4	4	127643521	127687867	ENSG00000164066	4:127643521-127644036	4:127685442-127687867	Conserved
ENSG00000164066_15-7	4	127669036	127687867	ENSG00000164066	4:127669036-127669154	4:127685442-127687867	Conserved
ENSG00000151422_22-17	5	108946130	109047198	ENSG00000151422	5:108946130-108946222	5:109047104-109047198	Conserved
ENSG00000112893_16-13	5	109817273	109823837	ENSG00000112893	5:109817273-109817438	5:109823723-109823837	Conserved
ENSG00000112893_3-2	5	109713520	109716264	ENSG00000112893	5:109713520-109713774	5:109716120-109716264	Conserved
ENSG00000112893_4-2	5	109713520	109729513	ENSG00000112893	5:109713520-109713774	5:109729342-109729513	Conserved
ENSG00000184863_6-2	7	155665175	155680908	ENSG00000184863	7:155665175-155665253	7:155680590-155680908	Conserved
ENSG00000203805_6-3	10	120503818	120521095	ENSG00000203805	10:120503818-120503926	10:120520971-120521095	Conserved
ENSG00000138190_13-4	10	92893349	92920050	ENSG00000138190	10:92893349-92893520	10:92919982-92920050	Conserved
ENSG00000107518_15-5	10	115120185	115215880	ENSG00000107518	10:115120185-115120268	10:115215697-115215880	Conserved
ENSG00000107518_9-5	10	115120185	115129535	ENSG00000107518	10:115120185-115120268	10:115129327-115129535	Conserved
ENSG00000166266_10-5	11	108046270	108054955	ENSG00000166266	11:108046270-108046369	11:108054875-108054955	Conserved
ENSG00000152520_9-5	13	28197185	28261458	ENSG00000152520	13:28197185-28197346	13:28261401-28261458	Conserved
ENSG00000152520_6-5	13	28197185	28220378	ENSG00000152520	13:28197185-28197346	13:28220231-28220378	Conserved
ENSG00000032219_15-10	14	58318542	58330169	ENSG00000032219	14:58318542-58318621	14:58330003-58330169	Conserved
ENSG00000119685_20-14	14	75707018	75720703	ENSG00000119685	14:75707018-75707087	14:75720596-75720703	Conserved
ENSG00000108443_9-7	17	59910562	59914703	ENSG00000108443	17:59910562-59910611	17:59914635-59914703	Conserved
ENSG00000109586_2-2	4	173247980	173248440	ENSG00000109586	4:173247980-173248440	4:173247980-173248440	Conserved
ENSG00000147649_6-3	8	97686668	97691188	ENSG00000147649	8:97686668-97686752	8:97690952-97691188	Conserved
ENSG00000165359_8-4	X	135545423	135549805	ENSG00000165359	X:135545423-135545572	X:135549642-135549805	Conserved
ENSG00000165359_9-4	X	135545423	135552146	ENSG00000165359	X:135545423-135545572	X:135551994-135552146	Conserved
ENSG00000165359_10-4	X	135545423	135556300	ENSG00000165359	X:135545423-135545572	X:135556168-135556300	Conserved
ENSG00000065526_4-2	1	15872816	15876678	ENSG00000065526	1:15872816-15873136	1:15876202-15876678	Conserved
ENSG00000172456_10-8	1	59339958	59378837	ENSG00000172456	1:59339958-59340069	1:59378749-59378837	Conserved
ENSG00000172456_10-9	1	59346247	59378837	ENSG00000172456	1:59346247-59346369	1:59378749-59378837	Conserved
ENSG00000119906_8-6	10	100915999	100918441	ENSG00000119906	10:100915999-100916042	10:100918384-100918441	Conserved
ENSG00000166167_8-7	10	101521639	101526199	ENSG00000166167	10:101521639-101521712	10:101526013-101526199	Conserved
ENSG00000151338_20-9	14	37247103	37308519	ENSG00000151338	14:37247103-37247240	14:37308349-37308519	Conserved
ENSG00000168234_9-5	18	24064140	24083081	ENSG00000168234	18:24064140-24064188	18:24082913-24083081	Conserved
ENSG00000091157_16-15	18	56756583	56758953	ENSG00000091157	18:56756583-56756698	18:56758865-56758953	Conserved
ENSG00000166377_15-11	18	79126267	79176907	ENSG00000166377	18:79126267-79126375	18:79176813-79176907	Conserved
ENSG00000166377_15-12	18	79143802	79176907	ENSG00000166377	18:79143802-79143859	18:79176813-79176907	Conserved
ENSG00000186575_11-9	22	29636751	29642285	ENSG00000186575	22:29636751-29636876	22:29642202-29642285	Conserved
ENSG00000146147_15-10	6	54149056	54189914	ENSG00000146147	6:54149056-54149127	6:54189870-54189914	Conserved
ENSG00000146147_20-10	6	54149056	54257361	ENSG00000146147	6:54149056-54149127	6:54257308-54257361	Conserved
ENSG00000162437_12-7	1	64802976	64814840	ENSG00000162437	1:64802976-64803061	1:64814704-64814840	Conserved
ENSG00000054282_22-19	1	243415702	243426558	ENSG00000054282	1:243415702-243415829	1:243426427-243426558	Conserved
ENSG00000107518_16-5	10	115120185	115241725	ENSG00000107518	10:115120185-115120268	10:115241571-115241725	Conserved
ENSG00000083535_12-8	13	72821849	72854155	ENSG00000083535	13:72821849-72821982	13:72854057-72854155	Conserved
ENSG00000151338_18-9	14	37247103	37285447	ENSG00000151338	14:37247103-37247240	14:37285318-37285447	Conserved
ENSG00000119661_10-5	14	73654847	73689515	ENSG00000119661	14:73654847-73654885	14:73689375-73689515	Conserved
ENSG00000187323_24-22	18	53205216	53215597	ENSG00000187323	18:53205216-53205364	18:53215548-53215597	Conserved
ENSG00000091157_19-13	18	56717964	56781656	ENSG00000091157	18:56717964-56718159	18:56781533-56781656	Conserved
ENSG00000112893_5-2	5	109713520	109755456	ENSG00000112893	5:109713520-109713774	5:109755329-109755456	Conserved
ENSG00000146147_14-10	6	54149056	54169572	ENSG00000146147	6:54149056-54149127	6:54169528-54169572	Conserved
ENSG00000112305_7-3	6	70732378	70798737	ENSG00000112305	6:70732378-70732511	6:70798657-70798737	Conserved
ENSG00000112305_5-3	6	70732378	70773425	ENSG00000112305	6:70732378-70732511	6:70772929-70773425	Conserved
ENSG00000152520_9-6	13	28220231	28261458	ENSG00000152520	13:28220231-28220378	13:28261401-28261458	Conserved
ENSG00000151338_21-9	14	37247103	37369624	ENSG00000151338	14:37247103-37247240	14:37369517-37369624	Conserved
ENSG00000072736_20-17	16	68174374	68191775	ENSG00000072736	16:68174374-68174514	16:68190768-68191775	Conserved
ENSG00000134030_15-12	18	48757919	48761689	ENSG00000134030	18:48757919-48758229	18:48760182-48761689	Conserved
ENSG00000166377_26-21	18	79253381	79307234	ENSG00000166377	18:79253381-79253541	18:79306986-79307234	Conserved
ENSG00000166377_26-23	18	79277054	79307234	ENSG00000166377	18:79277054-79277196	18:79306986-79307234	Conserved
ENSG00000166377_26-25	18	79303604	79307234	ENSG00000166377	18:79303604-79303716	18:79306986-79307234	Conserved
ENSG00000170871_6-5	4	6824185	6842204	ENSG00000170871	4:6824185-6824293	4:6842067-6842204	Conserved
ENSG00000079691_28-23	6	25515675	25540078	ENSG00000079691	6:25515675-25515847	6:25539947-25540078	Conserved
ENSG00000147481_36-28	8	50438543	50536808	ENSG00000147481	8:50438543-50438599	8:50536678-50536808	Conserved
ENSG00000147481_40-35	8	50530177	50590917	ENSG00000147481	8:50530177-50530259	8:50590879-50590917	Conserved
ENSG00000143674_5-3	1	233353807	233362293	ENSG00000143674	1:233353807-233353955	1:233362053-233362293	Conserved
ENSG00000078403_31-25	10	21673350	21727928	ENSG00000078403	10:21673350-21673419	10:21727856-21727928	Conserved
ENSG00000151572_12-7	12	100922226	100974889	ENSG00000151572	12:100922226-100922330	12:100974783-100974889	Conserved
ENSG00000083544_23-7	13	60439688	60535233	ENSG00000083544	13:60439688-60439772	13:60535108-60535233	Conserved
ENSG00000125386_29-9	4	2657803	2716104	ENSG00000125386	4:2657803-2657880	4:2716023-2716104	Conserved
ENSG00000109680_21-16	4	26717933	26748526	ENSG00000109680	4:26717933-26718017	4:26748411-26748526	Conserved
ENSG00000079691_38-32	6	25580924	25610181	ENSG00000079691	6:25580924-25580990	6:25610050-25610181	Conserved
ENSG00000184863_19-14	7	155737530	155745602	ENSG00000184863	7:155737530-155737593	7:155744961-155745602	Conserved
ENSG00000165392_19-9	8	31080867	31100955	ENSG00000165392	8:31080867-31081296	8:31100849-31100955	Conserved
ENSG00000046889_13-8	8	68030497	68060779	ENSG00000046889	8:68030497-68030658	8:68060679-68060779	Conserved
ENSG00000137494_14-11	11	83206058	83211430	ENSG00000137494	11:83206058-83206165	11:83211295-83211430	Conserved
ENSG00000067798_27-22	12	78137177	78168866	ENSG00000067798	12:78137177-78137365	12:78168755-78168866	Conserved
ENSG00000083535_16-13	13	72893784	72931267	ENSG00000083535	13:72893784-72893871	13:72931165-72931267	Conserved
ENSG00000153933_8-7	17	56844019	56845809	ENSG00000153933	17:56844019-56844178	17:56845690-56845809	Conserved
ENSG00000141622_7-6	18	46433190	46435396	ENSG00000141622	18:46433190-46433505	18:46435289-46435396	Conserved
ENSG00000112893_12-2	5	109713520	109789527	ENSG00000112893	5:109713520-109713774	5:109789460-109789527	Conserved
ENSG00000112893_12-5	5	109755329	109789527	ENSG00000112893	5:109755329-109755456	5:109789460-109789527	Conserved
ENSG00000196358_3-3	9	132197966	132198609	ENSG00000196358	9:132197966-132198609	9:132197966-132198609	Conserved
ENSG00000107518_30-5	10	115120185	115469329	ENSG00000107518	10:115120185-115120268	10:115469172-115469329	Conserved
ENSG00000179104_15-9	12	82965024	83030879	ENSG00000179104	12:82965024-82965109	12:83030798-83030879	Conserved
ENSG00000147481_37-28	8	50438543	50553179	ENSG00000147481	8:50438543-50438599	8:50553050-50553179	Conserved
ENSG00000147481_37-35	8	50530177	50553179	ENSG00000147481	8:50530177-50530259	8:50553050-50553179	Conserved
ENSG00000147481_31-28	8	50438543	50450729	ENSG00000147481	8:50438543-50438599	8:50450688-50450729	Conserved
ENSG00000203805_6-4	10	120513911	120521095	ENSG00000203805	10:120513911-120514001	10:120520971-120521095	Conserved
ENSG00000111785_13-9	12	106825726	106860412	ENSG00000111785	12:106825726-106825820	12:106860268-106860412	Conserved
ENSG00000100731_24-19	14	71026117	71036157	ENSG00000100731	14:71026117-71026288	14:71036065-71036157	Conserved
ENSG00000127663_8-6	19	5039836	5047669	ENSG00000127663	19:5039836-5040011	19:5047476-5047669	Conserved
ENSG00000145819_21-19	5	143054439	143057747	ENSG00000145819	5:143054439-143054526	5:143057642-143057747	Conserved
ENSG00000133739_25-20	8	85137464	85138475	ENSG00000133739	8:85137464-85137627	8:85138338-85138475	Conserved
ENSG00000147251_44-43	X	118654602	118654961	ENSG00000147251	X:118654602-118654817	X:118654904-118654961	Conserved
ENSG00000072736_14-13	16	68121987	68126610	ENSG00000072736	16:68121987-68123121	16:68126448-68126610	Conserved
ENSG00000152217_8-8	18	44949881	44953340	ENSG00000152217	18:44949881-44953340	18:44949881-44953340	Conserved
ENSG00000136011_53-51	12	103733006	103737780	ENSG00000136011	12:103733006-103733182	12:103737634-103737780	Conserved
ENSG00000072736_20-13	16	68121987	68191775	ENSG00000072736	16:68121987-68123121	16:68190768-68191775	Conserved
ENSG00000079691_37-36	6	25604812	25606273	ENSG00000079691	6:25604812-25604893	6:25606061-25606273	Conserved
ENSG00000104213_3-3	8	17589468	17589765	ENSG00000104213	8:17589468-17589765	8:17589468-17589765	Conserved
ENSG00000176248_15-15	9	137180181	137180384	ENSG00000176248	9:137180181-137180384	9:137180181-137180384	Conserved
ENSG00000111785_11-10	12	106842589	106843947	ENSG00000111785	12:106842589-106842817	12:106843852-106843947	Conserved
ENSG00000086544_7-6	19	40736986	40737769	ENSG00000086544	19:40736986-40737087	19:40737698-40737769	Conserved
ENSG00000198087_5-2	6	47503280	47554766	ENSG00000198087	6:47503280-47503440	6:47554646-47554766	Conserved
ENSG00000112320_3-2	6	107503657	107506427	ENSG00000112320	6:107503657-107503795	6:107506242-107506427	Conserved
ENSG00000146477_5-2	6	160397979	160410846	ENSG00000146477	6:160397979-160398082	6:160410729-160410846	Conserved
ENSG00000082805_27-26	12	1263034	1290012	ENSG00000082805	12:1263034-1263073	12:1289852-1290012	Conserved
ENSG00000171723_16-13	14	66965191	67023675	ENSG00000171723	14:66965191-66965325	14:67023633-67023675	Conserved
ENSG00000079691_25-23	6	25515675	25520337	ENSG00000079691	6:25515675-25515847	6:25520244-25520337	Conserved
ENSG00000079691_31-23	6	25515675	25556850	ENSG00000079691	6:25515675-25515847	6:25556701-25556850	Conserved
ENSG00000079691_31-29	6	25550910	25556850	ENSG00000079691	6:25550910-25551085	6:25556701-25556850	Conserved
ENSG00000107518_27-5	10	115120185	115426302	ENSG00000107518	10:115120185-115120268	10:115426250-115426302	Conserved
ENSG00000139767_8-7	12	119125381	119130834	ENSG00000139767	12:119125381-119125479	12:119130678-119130834	Conserved
ENSG00000108443_23-19	17	59935193	59940943	ENSG00000108443	17:59935193-59935300	17:59940836-59940943	Conserved
ENSG00000120910_13-6	8	22474954	22513432	ENSG00000120910	8:22474954-22475151	8:22513293-22513432	Conserved
ENSG00000189319_6-6	10	124681607	124682379	ENSG00000189319	10:124681607-124682379	10:124681607-124682379	Conserved
ENSG00000157741_10-8	7	139266333	139272440	ENSG00000157741	7:139266333-139266403	7:139272322-139272440	Conserved
ENSG00000120910_10-6	8	22474954	22498112	ENSG00000120910	8:22474954-22475151	8:22497999-22498112	Conserved
ENSG00000143674_5-2	1	233346442	233362293	ENSG00000143674	1:233346442-233346622	1:233362053-233362293	Conserved
ENSG00000082805_28-26	12	1263034	1371977	ENSG00000082805	12:1263034-1263073	12:1371833-1371977	Conserved
ENSG00000082805_28-27	12	1289852	1371977	ENSG00000082805	12:1289852-1290012	12:1371833-1371977	Conserved
ENSG00000072736_19-13	16	68121987	68183366	ENSG00000072736	16:68121987-68123121	16:68183240-68183366	Conserved
ENSG00000125779_16-11	20	3907926	3918796	ENSG00000125779	20:3907926-3908135	20:3918671-3918796	Conserved
ENSG00000005339_3-3	16	3850297	3851009	ENSG00000005339	16:3850297-3851009	16:3850297-3851009	Conserved
ENSG00000000460_27-27	1	169827051	169827199	ENSG00000000460	1:169827051-169827199	1:169827051-169827199	Non Conserved
ENSG00000003393_5-5	2	201760881	201761818	ENSG00000003393	2:201760881-201761818	2:201760881-201761818	Non Conserved
ENSG00000005156_8-7	17	34983002	34983552	ENSG00000005156	17:34983002-34983552	17:34983002-34983552	Non Conserved
ENSG00000005175_20-20	12	47668916	47669102	ENSG00000005175	12:47668916-47669102	12:47668916-47669102	Non Conserved
ENSG00000005379_25-25	17	58307611	58307762	ENSG00000005379	17:58307611-58307762	17:58307611-58307762	Non Conserved
ENSG00000006607_29-29	2	241468140	241468377	ENSG00000006607	2:241468140-241468377	2:241468140-241468377	Non Conserved
ENSG00000006607_30-30	2	241475857	241475987	ENSG00000006607	2:241475857-241475987	2:241475857-241475987	Non Conserved
ENSG00000007341_17-17	1	112610841	112611003	ENSG00000007341	1:112610841-112611003	1:112610841-112611003	Non Conserved
ENSG00000007392_21-21	16	199062	199238	ENSG00000007392	16:199062-199238	16:199062-199238	Non Conserved
ENSG00000008083_7-7	6	15487307	15487542	ENSG00000008083	6:15487307-15487542	6:15487307-15487542	Non Conserved
ENSG00000008083_9-9	6	15500907	15501409	ENSG00000008083	6:15500907-15501409	6:15500907-15501409	Non Conserved
ENSG00000008382_7-7	19	4352897	4353029	ENSG00000008382	19:4352897-4353029	19:4352897-4353029	Non Conserved
ENSG00000008869_37-37	2	37000586	37000813	ENSG00000008869	2:37000586-37000813	2:37000586-37000813	Non Conserved
ENSG00000011083_8-8	5	150201089	150201223	ENSG00000011083	5:150201089-150201223	5:150201089-150201223	Non Conserved
ENSG00000011114_12-12	14	93263785	93263993	ENSG00000011114	14:93263785-93263993	14:93263785-93263993	Non Conserved
ENSG00000011243_13-13	19	15400947	15401043	ENSG00000011243	19:15400947-15401043	19:15400947-15401043	Non Conserved
ENSG00000011304_13-13	19	805013	805187	ENSG00000011304	19:805013-805187	19:805013-805187	Non Conserved
ENSG00000012232_3-3	8	28715585	28718207	ENSG00000012232	8:28715585-28718207	8:28715585-28718207	Non Conserved
ENSG00000020577_9-9	14	54702062	54702580	ENSG00000020577	14:54702062-54702580	14:54702062-54702580	Non Conserved
ENSG00000021645_23-23	14	79697630	79697937	ENSG00000021645	14:79697630-79697937	14:79697630-79697937	Non Conserved
ENSG00000021645_24-24	14	79805112	79805190	ENSG00000021645	14:79805112-79805190	14:79805112-79805190	Non Conserved
ENSG00000021645_6-6	14	78714756	78715139	ENSG00000021645	14:78714756-78715139	14:78714756-78715139	Non Conserved
ENSG00000023909_7-7	1	93894614	93894728	ENSG00000023909	1:93894614-93894728	1:93894614-93894728	Non Conserved
ENSG00000025293_10-10	20	35842573	35842744	ENSG00000025293	20:35842573-35842744	20:35842573-35842744	Non Conserved
ENSG00000025293_18-18	20	35899370	35899648	ENSG00000025293	20:35899370-35899648	20:35899370-35899648	Non Conserved
ENSG00000029534_42-42	8	41684544	41684690	ENSG00000029534	8:41684544-41684690	8:41684544-41684690	Non Conserved
ENSG00000029534_50-50	8	41663659	41663742	ENSG00000029534	8:41663659-41663742	8:41663659-41663742	Non Conserved
ENSG00000029725_4-4	17	5308694	5308822	ENSG00000029725	17:5308694-5308822	17:5308694-5308822	Non Conserved
ENSG00000037637_4-4	1	16305803	16305919	ENSG00000037637	1:16305803-16305919	1:16305803-16305919	Non Conserved
ENSG00000038532_4-4	16	10969161	10969309	ENSG00000038532	16:10969161-10969309	16:10969161-10969309	Non Conserved
ENSG00000040275_10-10	5	169594571	169594681	ENSG00000040275	5:169594571-169594681	5:169594571-169594681	Non Conserved
ENSG00000040933_33-33	2	98576989	98577143	ENSG00000040933	2:98576989-98577143	2:98576989-98577143	Non Conserved
ENSG00000043462_20-20	5	170262635	170262742	ENSG00000043462	5:170262635-170262742	5:170262635-170262742	Non Conserved
ENSG00000044446_20-20	X	18910872	18910960	ENSG00000044446	X:18910872-18910960	X:18910872-18910960	Non Conserved
ENSG00000044459_21-21	9	17415966	17416189	ENSG00000044459	9:17415966-17416189	9:17415966-17416189	Non Conserved
ENSG00000044524_4-4	3	89127209	89127273	ENSG00000044524	3:89127209-89127273	3:89127209-89127273	Non Conserved
ENSG00000047056_4-4	10	1072116	1072293	ENSG00000047056	10:1072116-1072293	10:1072116-1072293	Non Conserved
ENSG00000047188_16-16	5	113553767	113553854	ENSG00000047188	5:113553767-113553854	5:113553767-113553854	Non Conserved
ENSG00000047578_19-19	16	27749584	27750306	ENSG00000047578	16:27749584-27750306	16:27749584-27750306	Non Conserved
ENSG00000047578_9-9	16	27677729	27677996	ENSG00000047578	16:27677729-27677996	16:27677729-27677996	Non Conserved
ENSG00000048052_23-23	7	18666213	18666476	ENSG00000048052	7:18666213-18666476	7:18666213-18666476	Non Conserved
ENSG00000048740_11-11	10	11217425	11217507	ENSG00000048740	10:11217425-11217507	10:11217425-11217507	Non Conserved
ENSG00000049192_30-30	5	65188016	65188220	ENSG00000049192	5:65188016-65188220	5:65188016-65188220	Non Conserved
ENSG00000051382_17-17	3	138698907	138699095	ENSG00000051382	3:138698907-138699095	3:138698907-138699095	Non Conserved
ENSG00000054392_11-11	1	210418154	210418325	ENSG00000054392	1:210418154-210418325	1:210418154-210418325	Non Conserved
ENSG00000054793_12-12	20	51674153	51674313	ENSG00000054793	20:51674153-51674313	20:51674153-51674313	Non Conserved
ENSG00000054793_14-14	20	51669997	51670109	ENSG00000054793	20:51669997-51670109	20:51669997-51670109	Non Conserved
ENSG00000055208_3-3	6	149369909	149370099	ENSG00000055208	6:149369909-149370099	6:149369909-149370099	Non Conserved
ENSG00000055208_4-4	6	149378018	149379518	ENSG00000055208	6:149378018-149379518	6:149378018-149379518	Non Conserved
ENSG00000057935_13-13	2	42682401	42682589	ENSG00000057935	2:42682401-42682589	2:42682401-42682589	Non Conserved
ENSG00000058056_16-16	3	179754732	179754854	ENSG00000058056	3:179754732-179754854	3:179754732-179754854	Non Conserved
ENSG00000058453_7-7	1	16936637	16936873	ENSG00000058453	1:16936637-16936873	1:16936637-16936873	Non Conserved
ENSG00000058668_20-20	1	203722478	203722689	ENSG00000058668	1:203722478-203722689	1:203722478-203722689	Non Conserved
ENSG00000060339_14-14	10	68747374	68747566	ENSG00000060339	10:68747374-68747566	10:68747374-68747566	Non Conserved
ENSG00000060339_20-20	10	68756273	68756483	ENSG00000060339	10:68756273-68756483	10:68756273-68756483	Non Conserved
ENSG00000060709_17-17	12	130434734	130434880	ENSG00000060709	12:130434734-130434880	12:130434734-130434880	Non Conserved
ENSG00000064313_6-6	8	119801794	119802025	ENSG00000064313	8:119801794-119802025	8:119801794-119802025	Non Conserved
ENSG00000064655_13-12	20	47016181	47016297	ENSG00000064655	20:47016181-47016297	20:47016181-47016297	Non Conserved
ENSG00000064999_10-10	6	34994302	34994422	ENSG00000064999	6:34994302-34994422	6:34994302-34994422	Non Conserved
ENSG00000064999_20-20	6	35083417	35083503	ENSG00000064999	6:35083417-35083503	6:35083417-35083503	Non Conserved
ENSG00000065060_20-20	6	34871819	34871925	ENSG00000065060	6:34871819-34871925	6:34871819-34871925	Non Conserved
ENSG00000065060_4-4	6	34823257	34823348	ENSG00000065060	6:34823257-34823348	6:34823257-34823348	Non Conserved
ENSG00000065243_3-3	1	88740988	88741288	ENSG00000065243	1:88740988-88741288	1:88740988-88741288	Non Conserved
ENSG00000065357_43-40	12	55951623	55952431	ENSG00000065357	12:55951623-55952431	12:55951623-55952431	Non Conserved
ENSG00000065413_9-9	2	197125837	197126037	ENSG00000065413	2:197125837-197126037	2:197125837-197126037	Non Conserved
ENSG00000065526_4-4	1	15876202	15876678	ENSG00000065526	1:15876202-15876678	1:15876202-15876678	Non Conserved
ENSG00000065833_6-6	6	83315310	83315413	ENSG00000065833	6:83315310-83315413	6:83315310-83315413	Non Conserved
ENSG00000066777_10-10	8	67271702	67271936	ENSG00000066777	8:67271702-67271936	8:67271702-67271936	Non Conserved
ENSG00000067113_3-3	5	55490960	55491114	ENSG00000067113	5:55490960-55491114	5:55490960-55491114	Non Conserved
ENSG00000067208_2-2	1	92736398	92736627	ENSG00000067208	1:92736398-92736627	1:92736398-92736627	Non Conserved
ENSG00000067369_15-15	15	43455892	43457218	ENSG00000067369	15:43455892-43457218	15:43455892-43457218	Non Conserved
ENSG00000067798_17-17	12	78119237	78119945	ENSG00000067798	12:78119237-78119945	12:78119237-78119945	Non Conserved
ENSG00000067798_8-8	12	78006419	78007445	ENSG00000067798	12:78006419-78007445	12:78006419-78007445	Non Conserved
ENSG00000068971_8-8	11	64930481	64930589	ENSG00000068971	11:64930481-64930589	11:64930481-64930589	Non Conserved
ENSG00000070961_8-8	12	89630505	89630645	ENSG00000070961	12:89630505-89630645	12:89630505-89630645	Non Conserved
ENSG00000071205_25-25	4	148046892	148047051	ENSG00000071205	4:148046892-148047051	4:148046892-148047051	Non Conserved
ENSG00000071242_14-14	6	166498508	166498650	ENSG00000071242	6:166498508-166498650	6:166498508-166498650	Non Conserved
ENSG00000072121_33-33	14	67775016	67775114	ENSG00000072121	14:67775016-67775114	14:67775016-67775114	Non Conserved
ENSG00000072501_14-14	X	53405245	53405391	ENSG00000072501	X:53405245-53405391	X:53405245-53405391	Non Conserved
ENSG00000072501_8-8	X	53411995	53412253	ENSG00000072501	X:53411995-53412253	X:53411995-53412253	Non Conserved
ENSG00000072736_13-13	16	68121987	68123121	ENSG00000072736	16:68121987-68123121	16:68121987-68123121	Non Conserved
ENSG00000072736_14-14	16	68126448	68126610	ENSG00000072736	16:68126448-68126610	16:68126448-68126610	Non Conserved
ENSG00000072736_20-20	16	68190768	68191775	ENSG00000072736	16:68190768-68191775	16:68190768-68191775	Non Conserved
ENSG00000072864_11-11	16	15696709	15696860	ENSG00000072864	16:15696709-15696860	16:15696709-15696860	Non Conserved
ENSG00000073711_3-3	3	136001059	136003493	ENSG00000073711	3:136001059-136003493	3:136001059-136003493	Non Conserved
ENSG00000073803_27-27	3	185472975	185473761	ENSG00000073803	3:185472975-185473761	3:185472975-185473761	Non Conserved
ENSG00000074054_26-26	2	121407471	121407715	ENSG00000074054	2:121407471-121407715	2:121407471-121407715	Non Conserved
ENSG00000075151_10-10	1	21089138	21089213	ENSG00000075151	1:21089138-21089213	1:21089138-21089213	Non Conserved
ENSG00000075151_21-21	1	20941491	20942330	ENSG00000075151	1:20941491-20942330	1:20941491-20942330	Non Conserved
ENSG00000076513_5-5	12	110013125	110013249	ENSG00000076513	12:110013125-110013249	12:110013125-110013249	Non Conserved
ENSG00000077097_31-31	3	25612515	25612709	ENSG00000077097	3:25612515-25612709	3:25612515-25612709	Non Conserved
ENSG00000077616_17-14	11	90158145	90159337	ENSG00000077616	11:90158145-90159337	11:90158145-90159337	Non Conserved
ENSG00000077616_29-29	11	90177853	90178117	ENSG00000077616	11:90177853-90178117	11:90177853-90178117	Non Conserved
ENSG00000077713_5-5	X	119410190	119410362	ENSG00000077713	X:119410190-119410362	X:119410190-119410362	Non Conserved
ENSG00000077782_17-17	8	38429682	38429948	ENSG00000077782	8:38429682-38429948	8:38429682-38429948	Non Conserved
ENSG00000078114_21-21	10	20831196	20831306	ENSG00000078114	10:20831196-20831306	10:20831196-20831306	Non Conserved
ENSG00000078269_24-24	6	158076626	158076782	ENSG00000078269	6:158076626-158076782	6:158076626-158076782	Non Conserved
ENSG00000078403_23-23	10	21651673	21651768	ENSG00000078403	10:21651673-21651768	10:21651673-21651768	Non Conserved
ENSG00000078403_24-24	10	21670449	21670704	ENSG00000078403	10:21670449-21670704	10:21670449-21670704	Non Conserved
ENSG00000078747_10-10	20	34413742	34413879	ENSG00000078747	20:34413742-34413879	20:34413742-34413879	Non Conserved
ENSG00000079263_20-20	2	230250981	230251061	ENSG00000079263	2:230250981-230251061	2:230250981-230251061	Non Conserved
ENSG00000079482_19-19	X	68096870	68097029	ENSG00000079482	X:68096870-68097029	X:68096870-68097029	Non Conserved
ENSG00000080224_5-5	3	96987330	96987993	ENSG00000080224	3:96987330-96987993	3:96987330-96987993	Non Conserved
ENSG00000080298_8-8	9	3330259	3330517	ENSG00000080298	9:3330259-3330517	9:3330259-3330517	Non Conserved
ENSG00000080823_28-28	14	102233688	102233789	ENSG00000080823	14:102233688-102233789	14:102233688-102233789	Non Conserved
ENSG00000081138_11-11	18	65843812	65844065	ENSG00000081138	18:65843812-65844065	18:65843812-65844065	Non Conserved
ENSG00000081237_39-39	1	198731617	198731726	ENSG00000081237	1:198731617-198731726	1:198731617-198731726	Non Conserved
ENSG00000081913_2-2	18	62830035	62830231	ENSG00000081913	18:62830035-62830231	18:62830035-62830231	Non Conserved
ENSG00000082293_23-23	6	70141893	70141928	ENSG00000082293	6:70141893-70141928	6:70141893-70141928	Non Conserved
ENSG00000082438_10-10	2	164743687	164743875	ENSG00000082438	2:164743687-164743875	2:164743687-164743875	Non Conserved
ENSG00000082516_24-24	5	154896092	154896343	ENSG00000082516	5:154896092-154896343	5:154896092-154896343	Non Conserved
ENSG00000082805_13-13	12	1083164	1083580	ENSG00000082805	12:1083164-1083580	12:1083164-1083580	Non Conserved
ENSG00000082805_27-27	12	1289852	1290012	ENSG00000082805	12:1289852-1290012	12:1289852-1290012	Non Conserved
ENSG00000083168_6-6	8	41987455	41987563	ENSG00000083168	8:41987455-41987563	8:41987455-41987563	Non Conserved
ENSG00000083290_22-22	17	19785937	19786086	ENSG00000083290	17:19785937-19786086	17:19785937-19786086	Non Conserved
ENSG00000083544_23-23	13	60535108	60535233	ENSG00000083544	13:60535108-60535233	13:60535108-60535233	Non Conserved
ENSG00000084112_15-15	12	108792286	108792829	ENSG00000084112	12:108792286-108792829	12:108792286-108792829	Non Conserved
ENSG00000085511_5-5	6	161048616	161049979	ENSG00000085511	6:161048616-161049979	6:161048616-161049979	Non Conserved
ENSG00000086102_4-4	9	33294420	33295427	ENSG00000086102	9:33294420-33295427	9:33294420-33295427	Non Conserved
ENSG00000086544_5-5	19	40733160	40733364	ENSG00000086544	19:40733160-40733364	19:40733160-40733364	Non Conserved
ENSG00000087095_11-11	17	28185179	28185265	ENSG00000087095	17:28185179-28185265	17:28185179-28185265	Non Conserved
ENSG00000087586_13-13	20	56386257	56386533	ENSG00000087586	20:56386257-56386533	20:56386257-56386533	Non Conserved
ENSG00000089022_15-15	12	111883581	111883768	ENSG00000089022	12:111883581-111883768	12:111883581-111883768	Non Conserved
ENSG00000089041_18-16	12	121177147	121177446	ENSG00000089041	12:121177147-121177446	12:121177147-121177446	Non Conserved
ENSG00000090006_17-17	19	40609746	40609871	ENSG00000090006	19:40609746-40609871	19:40609746-40609871	Non Conserved
ENSG00000090905_18-18	16	24804705	24804851	ENSG00000090905	16:24804705-24804851	16:24804705-24804851	Non Conserved
ENSG00000091073_9-8	7	76463545	76463709	ENSG00000091073	7:76463545-76463709	7:76463545-76463709	Non Conserved
ENSG00000091157_21-21	18	56879944	56880165	ENSG00000091157	18:56879944-56880165	18:56879944-56880165	Non Conserved
ENSG00000091831_12-12	6	151842597	151842787	ENSG00000091831	6:151842597-151842787	6:151842597-151842787	Non Conserved
ENSG00000092200_12-12	14	21320017	21320177	ENSG00000092200	14:21320017-21320177	14:21320017-21320177	Non Conserved
ENSG00000092439_22-22	15	50609581	50609724	ENSG00000092439	15:50609581-50609724	15:50609581-50609724	Non Conserved
ENSG00000095637_39-39	10	95339133	95339327	ENSG00000095637	10:95339133-95339327	10:95339133-95339327	Non Conserved
ENSG00000099139_13-13	9	76158983	76159171	ENSG00000099139	9:76158983-76159171	9:76158983-76159171	Non Conserved
ENSG00000099256_5-5	10	24937184	24937367	ENSG00000099256	10:24937184-24937367	10:24937184-24937367	Non Conserved
ENSG00000099284_4-4	10	70091757	70091954	ENSG00000099284	10:70091757-70091954	10:70091757-70091954	Non Conserved
ENSG00000099308_15-15	19	18134579	18134711	ENSG00000099308	19:18134579-18134711	19:18134579-18134711	Non Conserved
ENSG00000099331_14-14	19	17172336	17172477	ENSG00000099331	19:17172336-17172477	19:17172336-17172477	Non Conserved
ENSG00000099968_14-14	22	17702243	17702386	ENSG00000099968	22:17702243-17702386	22:17702243-17702386	Non Conserved
ENSG00000100154_3-3	22	28629552	28629830	ENSG00000100154	22:28629552-28629830	22:28629552-28629830	Non Conserved
ENSG00000100395_20-20	22	41227089	41227323	ENSG00000100395	22:41227089-41227323	22:41227089-41227323	Non Conserved
ENSG00000100504_14-14	14	50915825	50915971	ENSG00000100504	14:50915825-50915971	14:50915825-50915971	Non Conserved
ENSG00000100578_28-28	14	58487007	58487166	ENSG00000100578	14:58487007-58487166	14:58487007-58487166	Non Conserved
ENSG00000100599_5-5	14	92577360	92577477	ENSG00000100599	14:92577360-92577477	14:92577360-92577477	Non Conserved
ENSG00000100601_3-3	14	77694738	77694900	ENSG00000100601	14:77694738-77694900	14:77694738-77694900	Non Conserved
ENSG00000100629_18-18	14	80840682	80840768	ENSG00000100629	14:80840682-80840768	14:80840682-80840768	Non Conserved
ENSG00000100852_4-4	14	32090502	32094386	ENSG00000100852	14:32090502-32094386	14:32090502-32094386	Non Conserved
ENSG00000101871_8-8	X	10567002	10567603	ENSG00000101871	X:10567002-10567603	X:10567002-10567603	Non Conserved
ENSG00000102125_16-11	X	154413207	154413567	ENSG00000102125	X:154413207-154413567	X:154413207-154413567	Non Conserved
ENSG00000102531_6-6	13	49075289	49075364	ENSG00000102531	13:49075289-49075364	13:49075289-49075364	Non Conserved
ENSG00000102763_39-39	13	41685047	41685242	ENSG00000102763	13:41685047-41685242	13:41685047-41685242	Non Conserved
ENSG00000102893_16-16	16	47588905	47589102	ENSG00000102893	16:47588905-47589102	16:47588905-47589102	Non Conserved
ENSG00000102908_13-13	16	69653236	69653428	ENSG00000102908	16:69653236-69653428	16:69653236-69653428	Non Conserved
ENSG00000102908_26-26	16	69695136	69695379	ENSG00000102908	16:69695136-69695379	16:69695136-69695379	Non Conserved
ENSG00000102910_4-4	16	48252131	48252365	ENSG00000102910	16:48252131-48252365	16:48252131-48252365	Non Conserved
ENSG00000102935_4-4	16	49730771	49730971	ENSG00000102935	16:49730771-49730971	16:49730771-49730971	Non Conserved
ENSG00000102974_34-34	16	67629398	67629533	ENSG00000102974	16:67629398-67629533	16:67629398-67629533	Non Conserved
ENSG00000103064_3-3	16	68266593	68266721	ENSG00000103064	16:68266593-68266721	16:68266593-68266721	Non Conserved
ENSG00000103196_6-6	16	84838422	84838735	ENSG00000103196	16:84838422-84838735	16:84838422-84838735	Non Conserved
ENSG00000103222_14-14	16	16056092	16056295	ENSG00000103222	16:16056092-16056295	16:16056092-16056295	Non Conserved
ENSG00000103222_27-27	16	16111375	16111582	ENSG00000103222	16:16111375-16111582	16:16111375-16111582	Non Conserved
ENSG00000103227_5-5	16	954357	954666	ENSG00000103227	16:954357-954666	16:954357-954666	Non Conserved
ENSG00000103319_2-2	16	22225654	22225975	ENSG00000103319	16:22225654-22225975	16:22225654-22225975	Non Conserved
ENSG00000103429_10-10	16	14655066	14655210	ENSG00000103429	16:14655066-14655210	16:14655066-14655210	Non Conserved
ENSG00000103479_4-4	16	53442658	53442858	ENSG00000103479	16:53442658-53442858	16:53442658-53442858	Non Conserved
ENSG00000103489_10-10	16	17127666	17127861	ENSG00000103489	16:17127666-17127861	16:17127666-17127861	Non Conserved
ENSG00000103489_4-4	16	17200482	17200654	ENSG00000103489	16:17200482-17200654	16:17200482-17200654	Non Conserved
ENSG00000103507_13-13	16	31111300	31111389	ENSG00000103507	16:31111300-31111389	16:31111300-31111389	Non Conserved
ENSG00000103544_32-32	16	19647784	19647882	ENSG00000103544	16:19647784-19647882	16:19647784-19647882	Non Conserved
ENSG00000103549_25-25	16	30769475	30769600	ENSG00000103549	16:30769475-30769600	16:30769475-30769600	Non Conserved
ENSG00000103657_59-59	15	63659736	63659936	ENSG00000103657	15:63659736-63659936	15:63659736-63659936	Non Conserved
ENSG00000104044_16-16	15	27966690	27966822	ENSG00000104044	15:27966690-27966822	15:27966690-27966822	Non Conserved
ENSG00000104154_3-3	15	45511138	45511284	ENSG00000104154	15:45511138-45511284	15:45511138-45511284	Non Conserved
ENSG00000104218_10-10	8	67095293	67095732	ENSG00000104218	8:67095293-67095732	8:67095293-67095732	Non Conserved
ENSG00000104299_16-16	8	28812327	28812461	ENSG00000104299	8:28812327-28812461	8:28812327-28812461	Non Conserved
ENSG00000104365_28-28	8	42319270	42319421	ENSG00000104365	8:42319270-42319421	8:42319270-42319421	Non Conserved
ENSG00000104447_12-12	8	115603873	115605002	ENSG00000104447	8:115603873-115605002	8:115603873-115605002	Non Conserved
ENSG00000104450_17-17	8	100231156	100231288	ENSG00000104450	8:100231156-100231288	8:100231156-100231288	Non Conserved
ENSG00000104859_22-22	19	45059268	45059364	ENSG00000104859	19:45059268-45059364	19:45059268-45059364	Non Conserved
ENSG00000105143_17-17	19	14962002	14962345	ENSG00000105143	19:14962002-14962345	19:14962002-14962345	Non Conserved
ENSG00000105364_12-12	19	10258413	10258522	ENSG00000105364	19:10258413-10258522	19:10258413-10258522	Non Conserved
ENSG00000105516_8-8	19	48633444	48633655	ENSG00000105516	19:48633444-48633655	19:48633444-48633655	Non Conserved
ENSG00000105576_13-13	19	12715047	12715169	ENSG00000105576	19:12715047-12715169	19:12715047-12715169	Non Conserved
ENSG00000105738_11-11	19	38130498	38130772	ENSG00000105738	19:38130498-38130772	19:38130498-38130772	Non Conserved
ENSG00000105738_18-18	19	38182519	38182740	ENSG00000105738	19:38182519-38182740	19:38182519-38182740	Non Conserved
ENSG00000105856_24-24	7	107200160	107200301	ENSG00000105856	7:107200160-107200301	7:107200160-107200301	Non Conserved
ENSG00000106571_9-9	7	42148226	42148468	ENSG00000106571	7:42148226-42148468	7:42148226-42148468	Non Conserved
ENSG00000106868_13-13	9	112098470	112098662	ENSG00000106868	9:112098470-112098662	9:112098470-112098662	Non Conserved
ENSG00000106868_7-7	9	112143471	112143623	ENSG00000106868	9:112143471-112143623	9:112143471-112143623	Non Conserved
ENSG00000106948_4-4	9	114381060	114381446	ENSG00000106948	9:114381060-114381446	9:114381060-114381446	Non Conserved
ENSG00000107021_8-8	9	128797055	128797214	ENSG00000107021	9:128797055-128797214	9:128797055-128797214	Non Conserved
ENSG00000107021_9-9	9	128803250	128803460	ENSG00000107021	9:128803250-128803460	9:128803250-128803460	Non Conserved
ENSG00000107036_20-20	9	5763140	5763868	ENSG00000107036	9:5763140-5763868	9:5763140-5763868	Non Conserved
ENSG00000107362_3-3	9	71874614	71875083	ENSG00000107362	9:71874614-71875083	9:71874614-71875083	Non Conserved
ENSG00000107651_4-4	10	119898427	119898959	ENSG00000107651	10:119898427-119898959	10:119898427-119898959	Non Conserved
ENSG00000107779_3-3	10	86875867	86876085	ENSG00000107779	10:86875867-86876085	10:86875867-86876085	Non Conserved
ENSG00000107862_33-33	10	102376935	102377140	ENSG00000107862	10:102376935-102377140	10:102376935-102377140	Non Conserved
ENSG00000107864_3-3	10	92239346	92240361	ENSG00000107864	10:92239346-92240361	10:92239346-92240361	Non Conserved
ENSG00000107951_17-17	10	30322391	30322617	ENSG00000107951	10:30322391-30322617	10:30322391-30322617	Non Conserved
ENSG00000108187_10-10	10	68288931	68289019	ENSG00000108187	10:68288931-68289019	10:68288931-68289019	Non Conserved
ENSG00000108349_11-11	17	40163481	40164166	ENSG00000108349	17:40163481-40164166	17:40163481-40164166	Non Conserved
ENSG00000108443_22-20	17	59936215	59936541	ENSG00000108443	17:59936215-59936541	17:59936215-59936541	Non Conserved
ENSG00000108510_14-14	17	62010550	62011233	ENSG00000108510	17:62010550-62011233	17:62010550-62011233	Non Conserved
ENSG00000108788_12-10	17	42569204	42569606	ENSG00000108788	17:42569204-42569606	17:42569204-42569606	Non Conserved
ENSG00000109381_10-10	4	139073454	139073567	ENSG00000109381	4:139073454-139073567	4:139073454-139073567	Non Conserved
ENSG00000109674_9-9	4	177353308	177353728	ENSG00000109674	4:177353308-177353728	4:177353308-177353728	Non Conserved
ENSG00000109686_19-19	4	151147922	151148186	ENSG00000109686	4:151147922-151148186	4:151147922-151148186	Non Conserved
ENSG00000109906_4-4	11	114063211	114064568	ENSG00000109906	11:114063211-114064568	11:114063211-114064568	Non Conserved
ENSG00000109906_5-5	11	114156337	114156434	ENSG00000109906	11:114156337-114156434	11:114156337-114156434	Non Conserved
ENSG00000109944_4-4	11	122885761	122886193	ENSG00000109944	11:122885761-122886193	11:122885761-122886193	Non Conserved
ENSG00000109944_5-5	11	122903925	122904444	ENSG00000109944	11:122903925-122904444	11:122903925-122904444	Non Conserved
ENSG00000110074_11-11	11	126272969	126273079	ENSG00000110074	11:126272969-126273079	11:126272969-126273079	Non Conserved
ENSG00000110274_16-16	11	117371080	117371466	ENSG00000110274	11:117371080-117371466	11:117371080-117371466	Non Conserved
ENSG00000110318_6-6	11	101961741	101963880	ENSG00000110318	11:101961741-101963880	11:101961741-101963880	Non Conserved
ENSG00000110367_5-5	11	118786052	118786518	ENSG00000110367	11:118786052-118786518	11:118786052-118786518	Non Conserved
ENSG00000110975_6-6	12	33406789	33407356	ENSG00000110975	12:33406789-33407356	12:33406789-33407356	Non Conserved
ENSG00000111218_16-15	12	3583058	3583208	ENSG00000111218	12:3583058-3583208	12:3583058-3583208	Non Conserved
ENSG00000111249_24-24	12	111341780	111342053	ENSG00000111249	12:111341780-111342053	12:111341780-111342053	Non Conserved
ENSG00000111269_2-2	12	12635777	12635974	ENSG00000111269	12:12635777-12635974	12:12635777-12635974	Non Conserved
ENSG00000111271_30-30	12	111753772	111753915	ENSG00000111271	12:111753772-111753915	12:111753772-111753915	Non Conserved
ENSG00000111452_8-4	12	130966463	130971580	ENSG00000111452	12:130966463-130971580	12:130966463-130971580	Non Conserved
ENSG00000111785_7-7	12	106814696	106815304	ENSG00000111785	12:106814696-106815304	12:106814696-106815304	Non Conserved
ENSG00000112320_3-3	6	107506242	107506427	ENSG00000112320	6:107506242-107506427	6:107506242-107506427	Non Conserved
ENSG00000112394_3-3	6	111177212	111177665	ENSG00000112394	6:111177212-111177665	6:111177212-111177665	Non Conserved
ENSG00000112624_10-10	6	42828493	42830172	ENSG00000112624	6:42828493-42830172	6:42828493-42830172	Non Conserved
ENSG00000112659_31-31	6	43206321	43206510	ENSG00000112659	6:43206321-43206510	6:43206321-43206510	Non Conserved
ENSG00000112701_29-29	6	75702645	75703072	ENSG00000112701	6:75702645-75703072	6:75702645-75703072	Non Conserved
ENSG00000112851_25-25	5	66050783	66050966	ENSG00000112851	5:66050783-66050966	5:66050783-66050966	Non Conserved
ENSG00000112851_26-26	5	66053406	66054951	ENSG00000112851	5:66053406-66054951	5:66053406-66054951	Non Conserved
ENSG00000113805_19-19	3	74285305	74285491	ENSG00000113805	3:74285305-74285491	3:74285305-74285491	Non Conserved
ENSG00000114316_21-21	3	49286098	49286325	ENSG00000114316	3:49286098-49286325	3:49286098-49286325	Non Conserved
ENSG00000114541_8-8	3	69302343	69302435	ENSG00000114541	3:69302343-69302435	3:69302343-69302435	Non Conserved
ENSG00000114770_37-37	3	183937901	183938060	ENSG00000114770	3:183937901-183938060	3:183937901-183938060	Non Conserved
ENSG00000115310_8-8	2	55025086	55027485	ENSG00000115310	2:55025086-55027485	2:55025086-55027485	Non Conserved
ENSG00000115459_24-22	2	85371086	85371562	ENSG00000115459	2:85371086-85371562	2:85371086-85371562	Non Conserved
ENSG00000115504_21-21	2	62948260	62949162	ENSG00000115504	2:62948260-62949162	2:62948260-62949162	Non Conserved
ENSG00000115525_17-17	2	85847861	85848204	ENSG00000115525	2:85847861-85848204	2:85847861-85848204	Non Conserved
ENSG00000115649_7-7	2	219174988	219175108	ENSG00000115649	2:219174988-219175108	2:219174988-219175108	Non Conserved
ENSG00000115760_10-10	2	32414769	32416163	ENSG00000115760	2:32414769-32416163	2:32414769-32416163	Non Conserved
ENSG00000115808_12-12	2	36877891	36878027	ENSG00000115808	2:36877891-36878027	2:36877891-36878027	Non Conserved
ENSG00000115970_40-40	2	43397971	43398139	ENSG00000115970	2:43397971-43398139	2:43397971-43398139	Non Conserved
ENSG00000115970_47-47	2	43286908	43287061	ENSG00000115970	2:43286908-43287061	2:43286908-43287061	Non Conserved
ENSG00000116062_7-7	2	47795894	47796063	ENSG00000116062	2:47795894-47796063	2:47795894-47796063	Non Conserved
ENSG00000116117_26-26	2	205440370	205440672	ENSG00000116117	2:205440370-205440672	2:205440370-205440672	Non Conserved
ENSG00000116127_13-12	2	73489634	73491498	ENSG00000116127	2:73489634-73491498	2:73489634-73491498	Non Conserved
ENSG00000116127_21-21	2	73572262	73573424	ENSG00000116127	2:73572262-73573424	2:73572262-73573424	Non Conserved
ENSG00000116138_4-4	1	15536475	15536814	ENSG00000116138	1:15536475-15536814	1:15536475-15536814	Non Conserved
ENSG00000116141_4-4	1	220579354	220579557	ENSG00000116141	1:220579354-220579557	1:220579354-220579557	Non Conserved
ENSG00000116183_2-2	1	176555407	176557241	ENSG00000116183	1:176555407-176557241	1:176555407-176557241	Non Conserved
ENSG00000116183_3-3	1	176594524	176595595	ENSG00000116183	1:176594524-176595595	1:176594524-176595595	Non Conserved
ENSG00000116237_6-6	1	6231902	6232119	ENSG00000116237	1:6231902-6232119	1:6231902-6232119	Non Conserved
ENSG00000116539_2-2	1	155521100	155521618	ENSG00000116539	1:155521100-155521618	1:155521100-155521618	Non Conserved
ENSG00000116539_3-3	1	155477886	155482449	ENSG00000116539	1:155477886-155482449	1:155477886-155482449	Non Conserved
ENSG00000116604_14-14	1	156475108	156475237	ENSG00000116604	1:156475108-156475237	1:156475108-156475237	Non Conserved
ENSG00000116731_16-16	1	13778418	13782831	ENSG00000116731	1:13778418-13782831	1:13778418-13782831	Non Conserved
ENSG00000117419_3-3	1	44339045	44339322	ENSG00000117419	1:44339045-44339322	1:44339045-44339322	Non Conserved
ENSG00000118200_2-2	1	200760839	200761098	ENSG00000118200	1:200760839-200761098	1:200760839-200761098	Non Conserved
ENSG00000118407_7-7	6	75312397	75315202	ENSG00000118407	6:75312397-75315202	6:75312397-75315202	Non Conserved
ENSG00000118482_9-8	6	63646527	63646795	ENSG00000118482	6:63646527-63646795	6:63646527-63646795	Non Conserved
ENSG00000118596_8-7	12	59704772	59705018	ENSG00000118596	12:59704772-59705018	12:59704772-59705018	Non Conserved
ENSG00000118655_4-4	1	113908009	113908191	ENSG00000118655	1:113908009-113908191	1:113908009-113908191	Non Conserved
ENSG00000118762_16-14	4	88065374	88065879	ENSG00000118762	4:88065374-88065879	4:88065374-88065879	Non Conserved
ENSG00000118762_17-17	4	88067898	88068061	ENSG00000118762	4:88067898-88068061	4:88067898-88068061	Non Conserved
ENSG00000118762_4-4	4	88038251	88038501	ENSG00000118762	4:88038251-88038501	4:88038251-88038501	Non Conserved
ENSG00000119121_10-10	9	74827778	74827949	ENSG00000119121	9:74827778-74827949	9:74827778-74827949	Non Conserved
ENSG00000119397_27-26	9	121150170	121150483	ENSG00000119397	9:121150170-121150483	9:121150170-121150483	Non Conserved
ENSG00000119397_45-45	9	121168096	121168321	ENSG00000119397	9:121168096-121168321	9:121168096-121168321	Non Conserved
ENSG00000119509_5-5	9	100126383	100126549	ENSG00000119509	9:100126383-100126549	9:100126383-100126549	Non Conserved
ENSG00000119778_2-2	2	23895819	23895970	ENSG00000119778	2:23895819-23895970	2:23895819-23895970	Non Conserved
ENSG00000119778_8-8	2	23880639	23880755	ENSG00000119778	2:23880639-23880755	2:23880639-23880755	Non Conserved
ENSG00000120332_12-12	1	175123400	175123663	ENSG00000120332	1:175123400-175123663	1:175123400-175123663	Non Conserved
ENSG00000120539_3-3	10	27158549	27158686	ENSG00000120539	10:27158549-27158686	10:27158549-27158686	Non Conserved
ENSG00000120539_9-9	10	27169944	27171083	ENSG00000120539	10:27169944-27171083	10:27169944-27171083	Non Conserved
ENSG00000120549_28-28	10	24544981	24545103	ENSG00000120549	10:24544981-24545103	10:24544981-24545103	Non Conserved
ENSG00000120549_5-5	10	24219626	24219909	ENSG00000120549	10:24219626-24219909	10:24219626-24219909	Non Conserved
ENSG00000120549_6-6	10	24380869	24381067	ENSG00000120549	10:24380869-24381067	10:24380869-24381067	Non Conserved
ENSG00000121289_22-22	19	32915337	32915517	ENSG00000121289	19:32915337-32915517	19:32915337-32915517	Non Conserved
ENSG00000121621_15-15	11	28058926	28059161	ENSG00000121621	11:28058926-28059161	11:28058926-28059161	Non Conserved
ENSG00000121621_3-3	11	28097623	28097993	ENSG00000121621	11:28097623-28097993	11:28097623-28097993	Non Conserved
ENSG00000121741_12-10	13	19993063	19993919	ENSG00000121741	13:19993063-19993919	13:19993063-19993919	Non Conserved
ENSG00000121904_60-60	1	33580753	33580899	ENSG00000121904	1:33580753-33580899	1:33580753-33580899	Non Conserved
ENSG00000121957_6-5	1	108885275	108885578	ENSG00000121957	1:108885275-108885578	1:108885275-108885578	Non Conserved
ENSG00000122126_11-11	X	129558840	129559001	ENSG00000122126	X:129558840-129559001	X:129558840-129559001	Non Conserved
ENSG00000122299_6-6	16	11779166	11779363	ENSG00000122299	16:11779166-11779363	16:11779166-11779363	Non Conserved
ENSG00000122550_14-14	7	23152067	23152209	ENSG00000122550	7:23152067-23152209	7:23152067-23152209	Non Conserved
ENSG00000122707_4-4	9	36058827	36058901	ENSG00000122707	9:36058827-36058901	9:36058827-36058901	Non Conserved
ENSG00000122778_16-16	7	138861139	138861456	ENSG00000122778	7:138861139-138861456	7:138861139-138861456	Non Conserved
ENSG00000123213_3-3	5	65758567	65758826	ENSG00000123213	5:65758567-65758826	5:65758567-65758826	Non Conserved
ENSG00000123297_6-6	12	57786163	57786291	ENSG00000123297	12:57786163-57786291	12:57786163-57786291	Non Conserved
ENSG00000123352_10-10	12	49460770	49461037	ENSG00000123352	12:49460770-49461037	12:49460770-49461037	Non Conserved
ENSG00000123636_33-33	2	159349708	159350357	ENSG00000123636	2:159349708-159350357	2:159349708-159350357	Non Conserved
ENSG00000124177_6-6	20	41533050	41533570	ENSG00000124177	20:41533050-41533570	20:41533050-41533570	Non Conserved
ENSG00000124201_12-12	20	49257417	49257664	ENSG00000124201	20:49257417-49257664	20:49257417-49257664	Non Conserved
ENSG00000124214_4-4	20	49165997	49166285	ENSG00000124214	20:49165997-49166285	20:49165997-49166285	Non Conserved
ENSG00000124440_21-21	19	46329207	46329478	ENSG00000124440	19:46329207-46329478	19:46329207-46329478	Non Conserved
ENSG00000124574_16-16	6	43441862	43441960	ENSG00000124574	6:43441862-43441960	6:43441862-43441960	Non Conserved
ENSG00000124789_20-20	6	17628655	17629539	ENSG00000124789	6:17628655-17629539	6:17628655-17629539	Non Conserved
ENSG00000125755_16-16	19	45831384	45831588	ENSG00000125755	19:45831384-45831588	19:45831384-45831588	Non Conserved
ENSG00000126746_8-8	12	6678946	6679183	ENSG00000126746	12:6678946-6679183	12:6678946-6679183	Non Conserved
ENSG00000126804_5-5	14	64521487	64523402	ENSG00000126804	14:64521487-64523402	14:64521487-64523402	Non Conserved
ENSG00000126822_15-15	14	64732803	64732901	ENSG00000126822	14:64732803-64732901	14:64732803-64732901	Non Conserved
ENSG00000127124_10-10	1	41628749	41628947	ENSG00000127124	1:41628749-41628947	1:41628749-41628947	Non Conserved
ENSG00000127511_16-16	19	16866373	16866556	ENSG00000127511	19:16866373-16866556	19:16866373-16866556	Non Conserved
ENSG00000127947_18-18	7	77626705	77627675	ENSG00000127947	7:77626705-77627675	7:77626705-77627675	Non Conserved
ENSG00000128487_10-10	17	20204333	20205912	ENSG00000128487	17:20204333-20205912	17:20204333-20205912	Non Conserved
ENSG00000128573_19-19	7	114534617	114534706	ENSG00000128573	7:114534617-114534706	7:114534617-114534706	Non Conserved
ENSG00000128573_4-4	7	114162944	114163088	ENSG00000128573	7:114162944-114163088	7:114162944-114163088	Non Conserved
ENSG00000128656_10-10	2	174877840	174878128	ENSG00000128656	2:174877840-174878128	2:174877840-174878128	Non Conserved
ENSG00000128731_9-9	15	28280068	28280287	ENSG00000128731	15:28280068-28280287	15:28280068-28280287	Non Conserved
ENSG00000130313_5-5	19	17516173	17516280	ENSG00000130313	19:17516173-17516280	19:17516173-17516280	Non Conserved
ENSG00000130584_3-3	20	63789821	63790790	ENSG00000130584	20:63789821-63790790	20:63789821-63790790	Non Conserved
ENSG00000130695_6-6	1	26255171	26255865	ENSG00000130695	1:26255171-26255865	1:26255171-26255865	Non Conserved
ENSG00000130734_14-14	19	10552045	10552121	ENSG00000130734	19:10552045-10552121	19:10552045-10552121	Non Conserved
ENSG00000130783_14-14	12	122806151	122806295	ENSG00000130783	12:122806151-122806295	12:122806151-122806295	Non Conserved
ENSG00000130783_4-4	12	122777491	122777683	ENSG00000130783	12:122777491-122777683	12:122777491-122777683	Non Conserved
ENSG00000130856_23-23	18	76919776	76920058	ENSG00000130856	18:76919776-76920058	18:76919776-76920058	Non Conserved
ENSG00000130856_5-5	18	76851775	76851939	ENSG00000130856	18:76851775-76851939	18:76851775-76851939	Non Conserved
ENSG00000130956_3-3	9	96458379	96458541	ENSG00000130956	9:96458379-96458541	9:96458379-96458541	Non Conserved
ENSG00000131018_100-100	6	152329730	152331890	ENSG00000131018	6:152329730-152331890	6:152329730-152331890	Non Conserved
ENSG00000131966_21-18	14	58223622	58223856	ENSG00000131966	14:58223622-58223856	14:58223622-58223856	Non Conserved
ENSG00000132170_23-23	3	12416704	12417154	ENSG00000132170	3:12416704-12417154	3:12416704-12417154	Non Conserved
ENSG00000132305_25-25	2	86151297	86151520	ENSG00000132305	2:86151297-86151520	2:86151297-86151520	Non Conserved
ENSG00000132510_8-8	17	7846579	7846740	ENSG00000132510	17:7846579-7846740	17:7846579-7846740	Non Conserved
ENSG00000132549_38-38	8	99641811	99642498	ENSG00000132549	8:99641811-99642498	8:99641811-99642498	Non Conserved
ENSG00000132549_9-9	8	99121177	99121445	ENSG00000132549	8:99121177-99121445	8:99121177-99121445	Non Conserved
ENSG00000132554_34-34	8	99981937	99982116	ENSG00000132554	8:99981937-99982116	8:99981937-99982116	Non Conserved
ENSG00000132740_5-5	11	68911440	68911603	ENSG00000132740	11:68911440-68911603	11:68911440-68911603	Non Conserved
ENSG00000132952_6-6	13	30630835	30631474	ENSG00000132952	13:30630835-30631474	13:30630835-30631474	Non Conserved
ENSG00000133116_4-4	13	33060679	33061780	ENSG00000133116	13:33060679-33061780	13:33060679-33061780	Non Conserved
ENSG00000133226_9-6	1	24646667	24649029	ENSG00000133226	1:24646667-24649029	1:24646667-24649029	Non Conserved
ENSG00000133302_8-8	5	94651702	94651845	ENSG00000133302	5:94651702-94651845	5:94651702-94651845	Non Conserved
ENSG00000133454_36-36	22	25903631	25903831	ENSG00000133454	22:25903631-25903831	22:25903631-25903831	Non Conserved
ENSG00000133657_39-39	3	194427075	194427252	ENSG00000133657	3:194427075-194427252	3:194427075-194427252	Non Conserved
ENSG00000133858_36-36	12	71614834	71614938	ENSG00000133858	12:71614834-71614938	12:71614834-71614938	Non Conserved
ENSG00000134030_15-15	18	48761390	48761689	ENSG00000134030	18:48761390-48761689	18:48761390-48761689	Non Conserved
ENSG00000134255_4-4	1	111147642	111148053	ENSG00000134255	1:111147642-111148053	1:111147642-111148053	Non Conserved
ENSG00000134369_42-42	1	201817088	201817285	ENSG00000134369	1:201817088-201817285	1:201817088-201817285	Non Conserved
ENSG00000135048_8-8	9	71740063	71740232	ENSG00000135048	9:71740063-71740232	9:71740063-71740232	Non Conserved
ENSG00000135297_15-12	6	73479732	73480126	ENSG00000135297	6:73479732-73480126	6:73479732-73480126	Non Conserved
ENSG00000135424_6-6	12	55702872	55702951	ENSG00000135424	12:55702872-55702951	12:55702872-55702951	Non Conserved
ENSG00000135424_8-8	12	55700899	55701154	ENSG00000135424	12:55700899-55701154	12:55700899-55701154	Non Conserved
ENSG00000135503_14-14	12	51991863	51991993	ENSG00000135503	12:51991863-51991993	12:51991863-51991993	Non Conserved
ENSG00000135541_32-32	6	135394776	135394896	ENSG00000135541	6:135394776-135394896	6:135394776-135394896	Non Conserved
ENSG00000135837_8-8	1	179996553	179997175	ENSG00000135837	1:179996553-179997175	1:179996553-179997175	Non Conserved
ENSG00000135870_14-14	1	173951986	173952138	ENSG00000135870	1:173951986-173952138	1:173951986-173952138	Non Conserved
ENSG00000135905_43-43	2	224805206	224805320	ENSG00000135905	2:224805206-224805320	2:224805206-224805320	Non Conserved
ENSG00000135912_26-26	2	218750009	218750146	ENSG00000135912	2:218750009-218750146	2:218750009-218750146	Non Conserved
ENSG00000135913_18-18	2	218509979	218510140	ENSG00000135913	2:218509979-218510140	2:218509979-218510140	Non Conserved
ENSG00000135913_27-27	2	218474630	218474885	ENSG00000135913	2:218474630-218474885	2:218474630-218474885	Non Conserved
ENSG00000136169_5-5	13	49451553	49451909	ENSG00000136169	13:49451553-49451909	13:49451553-49451909	Non Conserved
ENSG00000136243_4-4	7	23185070	23185298	ENSG00000136243	7:23185070-23185298	7:23185070-23185298	Non Conserved
ENSG00000136603_8-5	3	170359699	170361429	ENSG00000136603	3:170359699-170361429	3:170359699-170361429	Non Conserved
ENSG00000137177_47-47	6	17764155	17764946	ENSG00000137177	6:17764155-17764946	6:17764155-17764946	Non Conserved
ENSG00000137628_28-28	4	168250954	168251106	ENSG00000137628	4:168250954-168251106	4:168250954-168251106	Non Conserved
ENSG00000137815_6-6	15	41466141	41466252	ENSG00000137815	15:41466141-41466252	15:41466141-41466252	Non Conserved
ENSG00000137822_22-22	15	43400044	43400221	ENSG00000137822	15:43400044-43400221	15:43400044-43400221	Non Conserved
ENSG00000137962_15-15	1	94201720	94201857	ENSG00000137962	1:94201720-94201857	1:94201720-94201857	Non Conserved
ENSG00000138036_11-11	2	43794457	43794643	ENSG00000138036	2:43794457-43794643	2:43794457-43794643	Non Conserved
ENSG00000138081_12-12	2	47832769	47832880	ENSG00000138081	2:47832769-47832880	2:47832769-47832880	Non Conserved
ENSG00000138092_7-7	2	24799675	24799844	ENSG00000138092	2:24799675-24799844	2:24799675-24799844	Non Conserved
ENSG00000138160_13-13	10	92632486	92632693	ENSG00000138160	10:92632486-92632693	10:92632486-92632693	Non Conserved
ENSG00000138160_16-16	10	92637387	92637545	ENSG00000138160	10:92637387-92637545	10:92637387-92637545	Non Conserved
ENSG00000138193_13-13	10	94259014	94259150	ENSG00000138193	10:94259014-94259150	10:94259014-94259150	Non Conserved
ENSG00000138193_8-8	10	94245946	94246621	ENSG00000138193	10:94245946-94246621	10:94245946-94246621	Non Conserved
ENSG00000138303_9-9	10	72196811	72196989	ENSG00000138303	10:72196811-72196989	10:72196811-72196989	Non Conserved
ENSG00000138336_11-11	10	68686356	68686707	ENSG00000138336	10:68686356-68686707	10:68686356-68686707	Non Conserved
ENSG00000138336_4-4	10	68644698	68647005	ENSG00000138336	10:68644698-68647005	10:68644698-68647005	Non Conserved
ENSG00000138336_7-7	10	68667045	68667256	ENSG00000138336	10:68667045-68667256	10:68667045-68667256	Non Conserved
ENSG00000138380_11-11	2	202917877	202918043	ENSG00000138380	2:202917877-202918043	2:202917877-202918043	Non Conserved
ENSG00000138399_14-14	2	169557187	169557297	ENSG00000138399	2:169557187-169557297	2:169557187-169557297	Non Conserved
ENSG00000138468_17-17	3	101343686	101343954	ENSG00000138468	3:101343686-101343954	3:101343686-101343954	Non Conserved
ENSG00000138592_11-11	15	50459000	50459162	ENSG00000138592	15:50459000-50459162	15:50459000-50459162	Non Conserved
ENSG00000138640_19-19	4	88787753	88787932	ENSG00000138640	4:88787753-88787932	4:88787753-88787932	Non Conserved
ENSG00000138640_5-5	4	89020460	89020669	ENSG00000138640	4:89020460-89020669	4:89020460-89020669	Non Conserved
ENSG00000138646_16-16	4	88475841	88476030	ENSG00000138646	4:88475841-88476030	4:88475841-88476030	Non Conserved
ENSG00000138771_12-12	4	76738761	76741926	ENSG00000138771	4:76738761-76741926	4:76738761-76741926	Non Conserved
ENSG00000138778_38-38	4	103140814	103141104	ENSG00000138778	4:103140814-103141104	4:103140814-103141104	Non Conserved
ENSG00000138802_23-23	4	109530289	109530464	ENSG00000138802	4:109530289-109530464	4:109530289-109530464	Non Conserved
ENSG00000138802_5-5	4	109462901	109463644	ENSG00000138802	4:109462901-109463644	4:109462901-109463644	Non Conserved
ENSG00000139083_5-5	12	11869424	11869969	ENSG00000139083	12:11869424-11869969	12:11869424-11869969	Non Conserved
ENSG00000139132_8-8	12	32564137	32564289	ENSG00000139132	12:32564137-32564289	12:32564137-32564289	Non Conserved
ENSG00000139370_10-10	12	128808788	128808956	ENSG00000139370	12:128808788-128808956	12:128808788-128808956	Non Conserved
ENSG00000139915_3-3	14	47301411	47301550	ENSG00000139915	14:47301411-47301550	14:47301411-47301550	Non Conserved
ENSG00000140015_10-10	14	62950133	62950559	ENSG00000140015	14:62950133-62950559	14:62950133-62950559	Non Conserved
ENSG00000140386_22-22	15	76728595	76728737	ENSG00000140386	15:76728595-76728737	15:76728595-76728737	Non Conserved
ENSG00000140443_16-16	15	98922148	98922431	ENSG00000140443	15:98922148-98922431	15:98922148-98922431	Non Conserved
ENSG00000140470_5-5	15	100330889	100331054	ENSG00000140470	15:100330889-100331054	15:100330889-100331054	Non Conserved
ENSG00000140575_38-38	15	90483361	90483593	ENSG00000140575	15:90483361-90483593	15:90483361-90483593	Non Conserved
ENSG00000140873_19-19	16	77319849	77320093	ENSG00000140873	16:77319849-77320093	16:77319849-77320093	Non Conserved
ENSG00000141027_43-43	17	16080607	16080727	ENSG00000141027	17:16080607-16080727	17:16080607-16080727	Non Conserved
ENSG00000141076_23-23	16	69167075	69167185	ENSG00000141076	16:69167075-69167185	16:69167075-69167185	Non Conserved
ENSG00000141298_24-24	17	29648144	29648344	ENSG00000141298	17:29648144-29648344	17:29648144-29648344	Non Conserved
ENSG00000141376_19-19	17	60947219	60947352	ENSG00000141376	17:60947219-60947352	17:60947219-60947352	Non Conserved
ENSG00000141446_13-13	18	21536042	21536185	ENSG00000141446	18:21536042-21536185	18:21536042-21536185	Non Conserved
ENSG00000141556_17-17	17	82889668	82889697	ENSG00000141556	17:82889668-82889697	17:82889668-82889697	Non Conserved
ENSG00000141905_7-7	19	3381712	3382243	ENSG00000141905	19:3381712-3382243	19:3381712-3382243	Non Conserved
ENSG00000142197_16-16	21	36230450	36231134	ENSG00000142197	21:36230450-36231134	21:36230450-36231134	Non Conserved
ENSG00000142599_26-26	1	8361763	8361876	ENSG00000142599	1:8361763-8361876	1:8361763-8361876	Non Conserved
ENSG00000142687_8-8	1	35478966	35479212	ENSG00000142687	1:35478966-35479212	1:35478966-35479212	Non Conserved
ENSG00000143322_11-11	1	179131311	179131481	ENSG00000143322	1:179131311-179131481	1:179131311-179131481	Non Conserved
ENSG00000143322_21-21	1	179112309	179112398	ENSG00000143322	1:179112309-179112398	1:179112309-179112398	Non Conserved
ENSG00000143379_27-27	1	150960563	150961191	ENSG00000143379	1:150960563-150961191	1:150960563-150961191	Non Conserved
ENSG00000143398_18-18	1	151236558	151236763	ENSG00000143398	1:151236558-151236763	1:151236558-151236763	Non Conserved
ENSG00000143702_8-8	1	243185779	243186072	ENSG00000143702	1:243185779-243186072	1:243185779-243186072	Non Conserved
ENSG00000143847_33-33	1	203056375	203056508	ENSG00000143847	1:203056375-203056508	1:203056375-203056508	Non Conserved
ENSG00000143850_3-3	1	204273626	204273740	ENSG00000143850	1:204273626-204273740	1:204273626-204273740	Non Conserved
ENSG00000143951_17-17	2	63404048	63404657	ENSG00000143951	2:63404048-63404657	2:63404048-63404657	Non Conserved
ENSG00000143970_6-6	2	25799385	25799535	ENSG00000143970	2:25799385-25799535	2:25799385-25799535	Non Conserved
ENSG00000144036_7-7	2	72575492	72575668	ENSG00000144036	2:72575492-72575668	2:72575492-72575668	Non Conserved
ENSG00000144306_7-7	2	174400990	174401189	ENSG00000144306	2:174400990-174401189	2:174400990-174401189	Non Conserved
ENSG00000144451_20-20	2	213862485	213862628	ENSG00000144451	2:213862485-213862628	2:213862485-213862628	Non Conserved
ENSG00000144535_18-17	2	232263207	232263440	ENSG00000144535	2:232263207-232263440	2:232263207-232263440	Non Conserved
ENSG00000144535_8-8	2	232087487	232087721	ENSG00000144535	2:232087487-232087721	2:232087487-232087721	Non Conserved
ENSG00000144559_20-20	3	11809517	11809682	ENSG00000144559	3:11809517-11809682	3:11809517-11809682	Non Conserved
ENSG00000144712_17-17	3	12827440	12827604	ENSG00000144712	3:12827440-12827604	3:12827440-12827604	Non Conserved
ENSG00000144724_3-3	3	61748878	61748982	ENSG00000144724	3:61748878-61748982	3:61748878-61748982	Non Conserved
ENSG00000144824_12-12	3	111913319	111913702	ENSG00000144824	3:111913319-111913702	3:111913319-111913702	Non Conserved
ENSG00000144895_25-25	3	150571958	150572529	ENSG00000144895	3:150571958-150572529	3:150571958-150572529	Non Conserved
ENSG00000145088_10-10	3	121857011	121857156	ENSG00000145088	3:121857011-121857156	3:121857011-121857156	Non Conserved
ENSG00000145088_11-11	3	121872537	121872788	ENSG00000145088	3:121872537-121872788	3:121872537-121872788	Non Conserved
ENSG00000145348_32-32	4	106095482	106095641	ENSG00000145348	4:106095482-106095641	4:106095482-106095641	Non Conserved
ENSG00000145526_15-15	5	19571579	19571832	ENSG00000145526	5:19571579-19571832	5:19571579-19571832	Non Conserved
ENSG00000145734_18-18	5	71509465	71511151	ENSG00000145734	5:71509465-71511151	5:71509465-71511151	Non Conserved
ENSG00000145743_11-11	5	108348399	108348530	ENSG00000145743	5:108348399-108348530	5:108348399-108348530	Non Conserved
ENSG00000145819_22-22	5	143120988	143121147	ENSG00000145819	5:143120988-143121147	5:143120988-143121147	Non Conserved
ENSG00000146147_15-15	6	54189870	54189914	ENSG00000146147	6:54189870-54189914	6:54189870-54189914	Non Conserved
ENSG00000146282_17-17	6	87518630	87518739	ENSG00000146282	6:87518630-87518739	6:87518630-87518739	Non Conserved
ENSG00000146426_12-12	6	155137177	155137612	ENSG00000146426	6:155137177-155137612	6:155137177-155137612	Non Conserved
ENSG00000146426_24-24	6	155183237	155183500	ENSG00000146426	6:155183237-155183500	6:155183237-155183500	Non Conserved
ENSG00000146463_20-20	1	35393595	35393739	ENSG00000146463	1:35393595-35393739	1:35393595-35393739	Non Conserved
ENSG00000146463_32-32	1	35415466	35415714	ENSG00000146463	1:35415466-35415714	1:35415466-35415714	Non Conserved
ENSG00000146535_4-4	7	2794928	2795143	ENSG00000146535	7:2794928-2795143	7:2794928-2795143	Non Conserved
ENSG00000146555_16-16	7	3987186	3987322	ENSG00000146555	7:3987186-3987322	7:3987186-3987322	Non Conserved
ENSG00000146950_8-8	X	9937134	9937685	ENSG00000146950	X:9937134-9937685	X:9937134-9937685	Non Conserved
ENSG00000147421_9-9	8	28970043	28970519	ENSG00000147421	8:28970043-28970519	8:28970043-28970519	Non Conserved
ENSG00000147488_32-32	8	52171792	52172583	ENSG00000147488	8:52171792-52172583	8:52171792-52172583	Non Conserved
ENSG00000147488_36-36	8	52163986	52164090	ENSG00000147488	8:52163986-52164090	8:52163986-52164090	Non Conserved
ENSG00000147548_4-4	8	38347497	38348215	ENSG00000147548	8:38347497-38348215	8:38347497-38348215	Non Conserved
ENSG00000147854_3-3	9	6420912	6421142	ENSG00000147854	9:6420912-6421142	9:6420912-6421142	Non Conserved
ENSG00000147862_20-20	9	14112999	14113081	ENSG00000147862	9:14112999-14113081	9:14112999-14113081	Non Conserved
ENSG00000147905_15-15	9	37305544	37305714	ENSG00000147905	9:37305544-37305714	9:37305544-37305714	Non Conserved
ENSG00000147905_8-8	9	37126312	37126942	ENSG00000147905	9:37126312-37126942	9:37126312-37126942	Non Conserved
ENSG00000148200_11-11	9	124535878	124536132	ENSG00000148200	9:124535878-124536132	9:124535878-124536132	Non Conserved
ENSG00000148516_23-23	10	31461037	31461237	ENSG00000148516	10:31461037-31461237	10:31461037-31461237	Non Conserved
ENSG00000148840_3-3	10	102137850	102138038	ENSG00000148840	10:102137850-102138038	10:102137850-102138038	Non Conserved
ENSG00000148842_9-9	10	103071774	103071839	ENSG00000148842	10:103071774-103071839	10:103071774-103071839	Non Conserved
ENSG00000149177_13-13	11	48139486	48139776	ENSG00000149177	11:48139486-48139776	11:48139486-48139776	Non Conserved
ENSG00000149289_4-4	11	110136663	110137414	ENSG00000149289	11:110136663-110137414	11:110136663-110137414	Non Conserved
ENSG00000149308_15-15	11	108172199	108173851	ENSG00000149308	11:108172199-108173851	11:108172199-108173851	Non Conserved
ENSG00000149311_30-30	11	108267171	108267342	ENSG00000149311	11:108267171-108267342	11:108267171-108267342	Non Conserved
ENSG00000149474_12-12	20	18161820	18162239	ENSG00000149474	20:18161820-18162239	20:18161820-18162239	Non Conserved
ENSG00000150054_12-12	10	28131560	28131691	ENSG00000150054	10:28131560-28131691	10:28131560-28131691	Non Conserved
ENSG00000150477_17-17	18	37066890	37067545	ENSG00000150477	18:37066890-37067545	18:37066890-37067545	Non Conserved
ENSG00000151067_11-11	12	2512812	2512984	ENSG00000151067	12:2512812-2512984	12:2512812-2512984	Non Conserved
ENSG00000151067_33-33	12	2611903	2612013	ENSG00000151067	12:2611903-2612013	12:2611903-2612013	Non Conserved
ENSG00000151148_40-40	12	109530547	109530658	ENSG00000151148	12:109530547-109530658	12:109530547-109530658	Non Conserved
ENSG00000151320_23-23	14	32821402	32824815	ENSG00000151320	14:32821402-32824815	14:32821402-32824815	Non Conserved
ENSG00000151388_4-4	5	33881119	33881480	ENSG00000151388	5:33881119-33881480	5:33881119-33881480	Non Conserved
ENSG00000151422_5-5	5	108798124	108798389	ENSG00000151422	5:108798124-108798389	5:108798124-108798389	Non Conserved
ENSG00000151612_6-6	4	145885678	145886158	ENSG00000151612	4:145885678-145886158	4:145885678-145886158	Non Conserved
ENSG00000151623_4-4	4	148435104	148436862	ENSG00000151623	4:148435104-148436862	4:148435104-148436862	Non Conserved
ENSG00000151693_11-11	2	9344532	9344635	ENSG00000151693	2:9344532-9344635	2:9344532-9344635	Non Conserved
ENSG00000151718_27-27	4	183312341	183312468	ENSG00000151718	4:183312341-183312468	4:183312341-183312468	Non Conserved
ENSG00000151746_9-9	12	32327461	32328555	ENSG00000151746	12:32327461-32328555	12:32327461-32328555	Non Conserved
ENSG00000151948_4-4	12	128875914	128876062	ENSG00000151948	12:128875914-128876062	12:128875914-128876062	Non Conserved
ENSG00000151952_2-2	12	129699810	129700698	ENSG00000151952	12:129699810-129700698	12:129699810-129700698	Non Conserved
ENSG00000152495_9-9	5	111446686	111446776	ENSG00000152495	5:111446686-111446776	5:111446686-111446776	Non Conserved
ENSG00000152763_20-20	1	66826820	66827046	ENSG00000152763	1:66826820-66827046	1:66826820-66827046	Non Conserved
ENSG00000152767_35-35	13	98440123	98440235	ENSG00000152767	13:98440123-98440235	13:98440123-98440235	Non Conserved
ENSG00000152822_14-14	6	146398769	146399699	ENSG00000152822	6:146398769-146399699	6:146398769-146399699	Non Conserved
ENSG00000152894_21-21	6	128089690	128089992	ENSG00000152894	6:128089690-128089992	6:128089690-128089992	Non Conserved
ENSG00000152942_22-22	5	69400049	69400169	ENSG00000152942	5:69400049-69400169	5:69400049-69400169	Non Conserved
ENSG00000153107_11-11	2	111863675	111863895	ENSG00000153107	2:111863675-111863895	2:111863675-111863895	Non Conserved
ENSG00000153317_20-20	8	130136951	130137038	ENSG00000153317	8:130136951-130137038	8:130136951-130137038	Non Conserved
ENSG00000153339_34-34	18	31839312	31839457	ENSG00000153339	18:31839312-31839457	18:31839312-31839457	Non Conserved
ENSG00000153707_44-44	9	8375936	8376090	ENSG00000153707	9:8375936-8376090	9:8375936-8376090	Non Conserved
ENSG00000153767_3-3	3	120750523	120751000	ENSG00000153767	3:120750523-120751000	3:120750523-120751000	Non Conserved
ENSG00000154237_16-16	15	101015326	101015402	ENSG00000154237	15:101015326-101015402	15:101015326-101015402	Non Conserved
ENSG00000154447_7-7	4	169136318	169136620	ENSG00000154447	4:169136318-169136620	4:169136318-169136620	Non Conserved
ENSG00000154556_53-53	4	185611780	185611980	ENSG00000154556	4:185611780-185611980	4:185611780-185611980	Non Conserved
ENSG00000154928_5-4	3	134951371	134952052	ENSG00000154928	3:134951371-134952052	3:134951371-134952052	Non Conserved
ENSG00000155111_7-7	6	110746126	110746201	ENSG00000155111	6:110746126-110746201	6:110746126-110746201	Non Conserved
ENSG00000155393_9-9	16	50078741	50079018	ENSG00000155393	16:50078741-50079018	16:50078741-50079018	Non Conserved
ENSG00000155966_6-6	X	148661908	148662768	ENSG00000155966	X:148661908-148662768	X:148661908-148662768	Non Conserved
ENSG00000156218_8-8	15	83819811	83820047	ENSG00000156218	15:83819811-83820047	15:83819811-83820047	Non Conserved
ENSG00000156232_5-5	15	82819323	82819488	ENSG00000156232	15:82819323-82819488	15:82819323-82819488	Non Conserved
ENSG00000156273_13-13	21	29329487	29329693	ENSG00000156273	21:29329487-29329693	21:29329487-29329693	Non Conserved
ENSG00000156299_4-4	21	31251742	31252189	ENSG00000156299	21:31251742-31252189	21:31251742-31252189	Non Conserved
ENSG00000156650_4-4	10	74842600	74843478	ENSG00000156650	10:74842600-74843478	10:74842600-74843478	Non Conserved
ENSG00000156671_5-5	10	75150514	75151106	ENSG00000156671	10:75150514-75151106	10:75150514-75151106	Non Conserved
ENSG00000156687_20-20	8	35774299	35774477	ENSG00000156687	8:35774299-35774477	8:35774299-35774477	Non Conserved
ENSG00000157106_26-26	16	18870801	18870888	ENSG00000157106	16:18870801-18870888	16:18870801-18870888	Non Conserved
ENSG00000157657_3-3	9	113988321	113988580	ENSG00000157657	9:113988321-113988580	9:113988321-113988580	Non Conserved
ENSG00000157827_25-25	2	152640791	152640914	ENSG00000157827	2:152640791-152640914	2:152640791-152640914	Non Conserved
ENSG00000158220_25-24	3	138474221	138474352	ENSG00000158220	3:138474221-138474352	3:138474221-138474352	Non Conserved
ENSG00000158321_8-8	7	69899286	69899498	ENSG00000158321	7:69899286-69899498	7:69899286-69899498	Non Conserved
ENSG00000158435_4-4	2	101262539	101262691	ENSG00000158435	2:101262539-101262691	2:101262539-101262691	Non Conserved
ENSG00000158545_11-11	16	88611268	88611536	ENSG00000158545	16:88611268-88611536	16:88611268-88611536	Non Conserved
ENSG00000158636_20-20	11	76472564	76472840	ENSG00000158636	11:76472564-76472840	11:76472564-76472840	Non Conserved
ENSG00000159216_22-22	21	34834410	34834601	ENSG00000159216	21:34834410-34834601	21:34834410-34834601	Non Conserved
ENSG00000159256_9-9	21	36344579	36344707	ENSG00000159256	21:36344579-36344707	21:36344579-36344707	Non Conserved
ENSG00000160551_24-24	17	29530407	29530619	ENSG00000160551	17:29530407-29530619	17:29530407-29530619	Non Conserved
ENSG00000160785_4-4	1	156199835	156200472	ENSG00000160785	1:156199835-156200472	1:156199835-156200472	Non Conserved
ENSG00000162337_11-11	11	68406524	68406813	ENSG00000162337	11:68406524-68406813	11:68406524-68406813	Non Conserved
ENSG00000162337_22-22	11	68438446	68438682	ENSG00000162337	11:68438446-68438682	11:68438446-68438682	Non Conserved
ENSG00000162849_8-8	1	245540767	245540950	ENSG00000162849	1:245540767-245540950	1:245540767-245540950	Non Conserved
ENSG00000162946_18-18	1	231818329	231818517	ENSG00000162946	1:231818329-231818517	1:231818329-231818517	Non Conserved
ENSG00000163053_7-7	2	230045745	230046722	ENSG00000163053	2:230045745-230046722	2:230045745-230046722	Non Conserved
ENSG00000163110_25-25	4	94585565	94585737	ENSG00000163110	4:94585565-94585737	4:94585565-94585737	Non Conserved
ENSG00000163125_10-10	1	150446226	150446401	ENSG00000163125	1:150446226-150446401	1:150446226-150446401	Non Conserved
ENSG00000163125_12-12	1	150460060	150460317	ENSG00000163125	1:150460060-150460317	1:150460060-150460317	Non Conserved
ENSG00000163125_13-13	1	150464527	150464727	ENSG00000163125	1:150464527-150464727	1:150464527-150464727	Non Conserved
ENSG00000163681_5-5	3	57831383	57831530	ENSG00000163681	3:57831383-57831530	3:57831383-57831530	Non Conserved
ENSG00000163749_6-6	4	76383662	76383738	ENSG00000163749	4:76383662-76383738	4:76383662-76383738	Non Conserved
ENSG00000163755_4-4	3	149140004	149140498	ENSG00000163755	3:149140004-149140498	3:149140004-149140498	Non Conserved
ENSG00000163808_13-13	3	44800314	44800437	ENSG00000163808	3:44800314-44800437	3:44800314-44800437	Non Conserved
ENSG00000163808_9-9	3	44794217	44794426	ENSG00000163808	3:44794217-44794426	3:44794217-44794426	Non Conserved
ENSG00000163848_10-10	3	125313308	125313656	ENSG00000163848	3:125313308-125313656	3:125313308-125313656	Non Conserved
ENSG00000163872_20-20	3	183777542	183777700	ENSG00000163872	3:183777542-183777700	3:183777542-183777700	Non Conserved
ENSG00000163939_15-15	3	52634602	52634815	ENSG00000163939	3:52634602-52634815	3:52634602-52634815	Non Conserved
ENSG00000163946_28-28	3	56624479	56624643	ENSG00000163946	3:56624479-56624643	3:56624479-56624643	Non Conserved
ENSG00000164066_4-4	4	127643521	127644056	ENSG00000164066	4:127643521-127644056	4:127643521-127644056	Non Conserved
ENSG00000164070_15-15	4	127807996	127808129	ENSG00000164070	4:127807996-127808129	4:127807996-127808129	Non Conserved
ENSG00000164074_12-12	4	128028475	128028853	ENSG00000164074	4:128028475-128028853	4:128028475-128028853	Non Conserved
ENSG00000164100_3-3	4	118053756	118054891	ENSG00000164100	4:118053756-118054891	4:118053756-118054891	Non Conserved
ENSG00000164134_13-13	4	139360500	139360628	ENSG00000164134	4:139360500-139360628	4:139360500-139360628	Non Conserved
ENSG00000164306_19-19	4	184685576	184685684	ENSG00000164306	4:184685576-184685684	4:184685576-184685684	Non Conserved
ENSG00000164327_21-21	5	38964792	38964892	ENSG00000164327	5:38964792-38964892	5:38964792-38964892	Non Conserved
ENSG00000164430_4-4	6	73440209	73440445	ENSG00000164430	6:73440209-73440445	6:73440209-73440445	Non Conserved
ENSG00000164430_5-5	6	73428709	73428811	ENSG00000164430	6:73428709-73428811	6:73428709-73428811	Non Conserved
ENSG00000164463_12-10	5	173108624	173110711	ENSG00000164463	5:173108624-173110711	5:173108624-173110711	Non Conserved
ENSG00000164463_7-7	5	173090315	173091401	ENSG00000164463	5:173090315-173091401	5:173090315-173091401	Non Conserved
ENSG00000164506_17-17	6	147316229	147316407	ENSG00000164506	6:147316229-147316407	6:147316229-147316407	Non Conserved
ENSG00000164542_10-10	7	36356902	36357590	ENSG00000164542	7:36356902-36357590	7:36356902-36357590	Non Conserved
ENSG00000164543_2-2	7	43595901	43596113	ENSG00000164543	7:43595901-43596113	7:43595901-43596113	Non Conserved
ENSG00000164543_4-4	7	43619597	43619723	ENSG00000164543	7:43619597-43619723	7:43619597-43619723	Non Conserved
ENSG00000164692_54-54	7	94424336	94424443	ENSG00000164692	7:94424336-94424443	7:94424336-94424443	Non Conserved
ENSG00000164941_28-26	8	94867140	94867337	ENSG00000164941	8:94867140-94867337	8:94867140-94867337	Non Conserved
ENSG00000164944_20-20	8	94506500	94506717	ENSG00000164944	8:94506500-94506717	8:94506500-94506717	Non Conserved
ENSG00000164944_28-28	8	94491578	94491909	ENSG00000164944	8:94491578-94491909	8:94491578-94491909	Non Conserved
ENSG00000164946_7-7	9	14851284	14851607	ENSG00000164946	9:14851284-14851607	9:14851284-14851607	Non Conserved
ENSG00000165006_7-7	9	34241185	34242108	ENSG00000165006	9:34241185-34242108	9:34241185-34242108	Non Conserved
ENSG00000165240_15-15	X	77998478	77998684	ENSG00000165240	X:77998478-77998684	X:77998478-77998684	Non Conserved
ENSG00000165275_9-9	9	37768076	37768228	ENSG00000165275	9:37768076-37768228	9:37768076-37768228	Non Conserved
ENSG00000165525_22-22	14	49825867	49825955	ENSG00000165525	14:49825867-49825955	14:49825867-49825955	Non Conserved
ENSG00000165995_19-18	10	18401924	18402043	ENSG00000165995	10:18401924-18402043	10:18401924-18402043	Non Conserved
ENSG00000166004_34-34	11	93729614	93729781	ENSG00000166004	11:93729614-93729781	11:93729614-93729781	Non Conserved
ENSG00000166004_35-35	11	93729870	93729969	ENSG00000166004	11:93729870-93729969	11:93729870-93729969	Non Conserved
ENSG00000166398_12-12	19	34341422	34342455	ENSG00000166398	19:34341422-34342455	19:34341422-34342455	Non Conserved
ENSG00000166669_15-15	16	10430611	10431455	ENSG00000166669	16:10430611-10431455	16:10430611-10431455	Non Conserved
ENSG00000166783_27-27	16	15609523	15609725	ENSG00000166783	16:15609523-15609725	16:15609523-15609725	Non Conserved
ENSG00000166788_13-13	11	18086866	18087054	ENSG00000166788	11:18086866-18087054	11:18086866-18087054	Non Conserved
ENSG00000166888_25-25	12	57099767	57099903	ENSG00000166888	12:57099767-57099903	12:57099767-57099903	Non Conserved
ENSG00000167257_7-4	11	117238601	117239860	ENSG00000167257	11:117238601-117239860	11:117238601-117239860	Non Conserved
ENSG00000167258_5-5	17	39492751	39492890	ENSG00000167258	17:39492751-39492890	17:39492751-39492890	Non Conserved
ENSG00000167323_14-14	11	4083263	4083498	ENSG00000167323	11:4083263-4083498	11:4083263-4083498	Non Conserved
ENSG00000168014_14-14	11	74118228	74118382	ENSG00000168014	11:74118228-74118382	11:74118228-74118382	Non Conserved
ENSG00000168014_35-35	11	74057406	74057544	ENSG00000168014	11:74057406-74057544	11:74057406-74057544	Non Conserved
ENSG00000168411_7-7	16	74660932	74661451	ENSG00000168411	16:74660932-74661451	16:74660932-74661451	Non Conserved
ENSG00000168538_18-18	4	183684145	183684223	ENSG00000168538	4:183684145-183684223	4:183684145-183684223	Non Conserved
ENSG00000168575_7-7	8	42472102	42472654	ENSG00000168575	8:42472102-42472654	8:42472102-42472654	Non Conserved
ENSG00000168769_8-8	4	105233897	105237351	ENSG00000168769	4:105233897-105237351	4:105233897-105237351	Non Conserved
ENSG00000168807_5-5	16	69245602	69245815	ENSG00000168807	16:69245602-69245815	16:69245602-69245815	Non Conserved
ENSG00000168807_9-9	16	69284048	69284244	ENSG00000168807	16:69284048-69284244	16:69284048-69284244	Non Conserved
ENSG00000169306_3-3	X	29282938	29283217	ENSG00000169306	X:29282938-29283217	X:29282938-29283217	Non Conserved
ENSG00000169330_3-3	15	79456098	79458445	ENSG00000169330	15:79456098-79458445	15:79456098-79458445	Non Conserved
ENSG00000169379_9-9	3	94003659	94003908	ENSG00000169379	3:94003659-94003908	3:94003659-94003908	Non Conserved
ENSG00000169398_53-53	8	140674298	140674404	ENSG00000169398	8:140674298-140674404	8:140674298-140674404	Non Conserved
ENSG00000170011_8-8	3	40044050	40044271	ENSG00000170011	3:40044050-40044271	3:40044050-40044271	Non Conserved
ENSG00000170037_23-23	17	7945728	7945986	ENSG00000170037	17:7945728-7945986	17:7945728-7945986	Non Conserved
ENSG00000170085_13-13	5	176313691	176313845	ENSG00000170085	5:176313691-176313845	5:176313691-176313845	Non Conserved
ENSG00000170264_6-6	2	61842122	61842360	ENSG00000170264	2:61842122-61842360	2:61842122-61842360	Non Conserved
ENSG00000170390_4-4	4	150102478	150102812	ENSG00000170390	4:150102478-150102812	4:150102478-150102812	Non Conserved
ENSG00000170579_23-23	18	3534194	3534615	ENSG00000170579	18:3534194-3534615	18:3534194-3534615	Non Conserved
ENSG00000170734_9-9	6	43600988	43601091	ENSG00000170734	6:43600988-43601091	6:43600988-43601091	Non Conserved
ENSG00000170743_5-5	11	7313395	7313941	ENSG00000170743	11:7313395-7313941	11:7313395-7313941	Non Conserved
ENSG00000170802_3-3	2	48346201	48346751	ENSG00000170802	2:48346201-48346751	2:48346201-48346751	Non Conserved
ENSG00000170927_36-36	6	51959870	51960026	ENSG00000170927	6:51959870-51960026	6:51959870-51960026	Non Conserved
ENSG00000171206_20-20	10	102656270	102656385	ENSG00000171206	10:102656270-102656385	10:102656270-102656385	Non Conserved
ENSG00000171475_8-7	17	40260535	40260667	ENSG00000171475	17:40260535-40260667	17:40260535-40260667	Non Conserved
ENSG00000171723_13-13	14	66965191	66965325	ENSG00000171723	14:66965191-66965325	14:66965191-66965325	Non Conserved
ENSG00000171793_11-9	1	40995917	40997526	ENSG00000171793	1:40995917-40997526	1:40995917-40997526	Non Conserved
ENSG00000171824_6-6	1	11091014	11091179	ENSG00000171824	1:11091014-11091179	1:11091014-11091179	Non Conserved
ENSG00000171988_25-25	10	63189168	63189446	ENSG00000171988	10:63189168-63189446	10:63189168-63189446	Non Conserved
ENSG00000172197_2-2	6	20152624	20152769	ENSG00000172197	6:20152624-20152769	6:20152624-20152769	Non Conserved
ENSG00000172262_18-15	5	43161249	43161931	ENSG00000172262	5:43161249-43161931	5:43161249-43161931	Non Conserved
ENSG00000172995_30-30	3	35708969	35709070	ENSG00000172995	3:35708969-35709070	3:35708969-35709070	Non Conserved
ENSG00000173040_19-19	4	5618478	5618682	ENSG00000173040	4:5618478-5618682	4:5618478-5618682	Non Conserved
ENSG00000173273_6-6	8	9580159	9580383	ENSG00000173273	8:9580159-9580383	8:9580159-9580383	Non Conserved
ENSG00000173452_4-4	7	19725514	19725768	ENSG00000173452	7:19725514-19725768	7:19725514-19725768	Non Conserved
ENSG00000173473_11-11	3	47706409	47706530	ENSG00000173473	3:47706409-47706530	3:47706409-47706530	Non Conserved
ENSG00000173575_25-25	15	92967325	92967513	ENSG00000173575	15:92967325-92967513	15:92967325-92967513	Non Conserved
ENSG00000173575_45-45	15	93002177	93002317	ENSG00000173575	15:93002177-93002317	15:93002177-93002317	Non Conserved
ENSG00000173575_51-51	15	93014696	93014909	ENSG00000173575	15:93014696-93014909	15:93014696-93014909	Non Conserved
ENSG00000173889_18-18	3	170145423	170145521	ENSG00000173889	3:170145423-170145521	3:170145423-170145521	Non Conserved
ENSG00000173889_20-20	3	170136419	170136665	ENSG00000173889	3:170136419-170136665	3:170136419-170136665	Non Conserved
ENSG00000173889_24-24	3	170122591	170122744	ENSG00000173889	3:170122591-170122744	3:170122591-170122744	Non Conserved
ENSG00000173889_25-25	3	170117226	170117476	ENSG00000173889	3:170117226-170117476	3:170117226-170117476	Non Conserved
ENSG00000174106_12-12	12	65240909	65241087	ENSG00000174106	12:65240909-65241087	12:65240909-65241087	Non Conserved
ENSG00000174106_16-15	12	65245669	65245939	ENSG00000174106	12:65245669-65245939	12:65245669-65245939	Non Conserved
ENSG00000174197_2-2	15	41668828	41669958	ENSG00000174197	15:41668828-41669958	15:41668828-41669958	Non Conserved
ENSG00000174197_3-3	15	41696075	41697023	ENSG00000174197	15:41696075-41697023	15:41696075-41697023	Non Conserved
ENSG00000174628_15-13	16	19763848	19764112	ENSG00000174628	16:19763848-19764112	16:19763848-19764112	Non Conserved
ENSG00000174628_9-9	16	19733698	19733827	ENSG00000174628	16:19733698-19733827	16:19733698-19733827	Non Conserved
ENSG00000175029_7-7	10	125038997	125039155	ENSG00000175029	10:125038997-125039155	10:125038997-125039155	Non Conserved
ENSG00000176406_2-2	8	103697086	103697296	ENSG00000176406	8:103697086-103697296	8:103697086-103697296	Non Conserved
ENSG00000176406_9-9	8	103885298	103886223	ENSG00000176406	8:103885298-103886223	8:103885298-103886223	Non Conserved
ENSG00000176454_9-9	15	34364194	34364306	ENSG00000176454	15:34364194-34364306	15:34364194-34364306	Non Conserved
ENSG00000176783_8-8	5	179569302	179569425	ENSG00000176783	5:179569302-179569425	5:179569302-179569425	Non Conserved
ENSG00000176927_10-7	17	29968791	29969367	ENSG00000176927	17:29968791-29969367	17:29968791-29969367	Non Conserved
ENSG00000177694_11-11	3	175096790	175097291	ENSG00000177694	3:175096790-175097291	3:175096790-175097291	Non Conserved
ENSG00000177694_14-14	3	175233931	175234204	ENSG00000177694	3:175233931-175234204	3:175233931-175234204	Non Conserved
ENSG00000178445_4-4	9	6610192	6610356	ENSG00000178445	9:6610192-6610356	9:6610192-6610356	Non Conserved
ENSG00000179104_6-6	12	82857010	82857580	ENSG00000179104	12:82857010-82857580	12:82857010-82857580	Non Conserved
ENSG00000179104_7-7	12	82895818	82896646	ENSG00000179104	12:82895818-82896646	12:82895818-82896646	Non Conserved
ENSG00000179134_17-17	19	39378504	39378589	ENSG00000179134	19:39378504-39378589	19:39378504-39378589	Non Conserved
ENSG00000179151_10-10	15	74671455	74671774	ENSG00000179151	15:74671455-74671774	15:74671455-74671774	Non Conserved
ENSG00000179397_14-14	1	244552322	244552814	ENSG00000179397	1:244552322-244552814	1:244552322-244552814	Non Conserved
ENSG00000179397_15-15	1	244560668	244561145	ENSG00000179397	1:244560668-244561145	1:244560668-244561145	Non Conserved
ENSG00000179397_16-16	1	244572330	244572772	ENSG00000179397	1:244572330-244572772	1:244572330-244572772	Non Conserved
ENSG00000179399_3-3	13	91693187	91693881	ENSG00000179399	13:91693187-91693881	13:91693187-91693881	Non Conserved
ENSG00000179520_3-3	12	100380701	100380953	ENSG00000179520	12:100380701-100380953	12:100380701-100380953	Non Conserved
ENSG00000179603_14-14	7	126532952	126533887	ENSG00000179603	7:126532952-126533887	7:126532952-126533887	Non Conserved
ENSG00000180776_6-6	13	21413652	21413772	ENSG00000180776	13:21413652-21413772	13:21413652-21413772	Non Conserved
ENSG00000181090_4-4	9	137716626	137717182	ENSG00000181090	9:137716626-137717182	9:137716626-137717182	Non Conserved
ENSG00000181555_15-15	3	47083720	47084382	ENSG00000181555	3:47083720-47084382	3:47083720-47084382	Non Conserved
ENSG00000182621_34-34	20	8765139	8765358	ENSG00000182621	20:8765139-8765358	20:8765139-8765358	Non Conserved
ENSG00000183401_20-17	19	11353451	11353874	ENSG00000183401	19:11353451-11353874	19:11353451-11353874	Non Conserved
ENSG00000183914_7-7	17	7733087	7733315	ENSG00000183914	17:7733087-7733315	17:7733087-7733315	Non Conserved
ENSG00000183960_14-14	3	19456768	19456982	ENSG00000183960	3:19456768-19456982	3:19456768-19456982	Non Conserved
ENSG00000183960_7-7	3	19347725	19347965	ENSG00000183960	3:19347725-19347965	3:19347725-19347965	Non Conserved
ENSG00000184005_4-4	1	76412008	76412417	ENSG00000184005	1:76412008-76412417	1:76412008-76412417	Non Conserved
ENSG00000184083_14-14	X	54116545	54116794	ENSG00000184083	X:54116545-54116794	X:54116545-54116794	Non Conserved
ENSG00000184083_6-6	X	54159370	54159616	ENSG00000184083	X:54159370-54159616	X:54159370-54159616	Non Conserved
ENSG00000184304_6-6	14	29638489	29638566	ENSG00000184304	14:29638489-29638566	14:29638489-29638566	Non Conserved
ENSG00000184384_3-3	11	96091892	96093517	ENSG00000184384	11:96091892-96093517	11:96091892-96093517	Non Conserved
ENSG00000184922_43-43	17	45245878	45245973	ENSG00000184922	17:45245878-45245973	17:45245878-45245973	Non Conserved
ENSG00000185008_3-3	3	77098014	77098340	ENSG00000185008	3:77098014-77098340	3:77098014-77098340	Non Conserved
ENSG00000185219_6-6	3	44455121	44455696	ENSG00000185219	3:44455121-44455696	3:44455121-44455696	Non Conserved
ENSG00000185722_4-4	17	4242256	4242448	ENSG00000185722	17:4242256-4242448	17:4242256-4242448	Non Conserved
ENSG00000185736_4-4	10	1270955	1271069	ENSG00000185736	10:1270955-1271069	10:1270955-1271069	Non Conserved
ENSG00000185896_4-4	13	113309643	113309862	ENSG00000185896	13:113309643-113309862	13:113309643-113309862	Non Conserved
ENSG00000186635_17-17	11	72709870	72709976	ENSG00000186635	11:72709870-72709976	11:72709870-72709976	Non Conserved
ENSG00000186732_8-8	22	43474736	43474961	ENSG00000186732	22:43474736-43474961	22:43474736-43474961	Non Conserved
ENSG00000187391_16-16	7	78255943	78256581	ENSG00000187391	7:78255943-78256581	7:78255943-78256581	Non Conserved
ENSG00000187720_4-4	15	71660530	71660734	ENSG00000187720	15:71660530-71660734	15:71660530-71660734	Non Conserved
ENSG00000187742_9-9	9	89328660	89328886	ENSG00000187742	9:89328660-89328886	9:89328660-89328886	Non Conserved
ENSG00000187790_18-18	14	45170589	45170746	ENSG00000187790	14:45170589-45170746	14:45170589-45170746	Non Conserved
ENSG00000188177_3-3	2	112299849	112300029	ENSG00000188177	2:112299849-112300029	2:112299849-112300029	Non Conserved
ENSG00000188419_14-14	X	85894188	85894284	ENSG00000188419	X:85894188-85894284	X:85894188-85894284	Non Conserved
ENSG00000188580_2-2	6	124283005	124283142	ENSG00000188580	6:124283005-124283142	6:124283005-124283142	Non Conserved
ENSG00000188687_21-21	2	74239335	74239535	ENSG00000188687	2:74239335-74239535	2:74239335-74239535	Non Conserved
ENSG00000189079_14-14	12	45837498	45837707	ENSG00000189079	12:45837498-45837707	12:45837498-45837707	Non Conserved
ENSG00000189337_10-10	1	15043989	15044159	ENSG00000189337	1:15043989-15044159	1:15043989-15044159	Non Conserved
ENSG00000196141_19-19	2	200419250	200419496	ENSG00000196141	2:200419250-200419496	2:200419250-200419496	Non Conserved
ENSG00000196187_11-11	1	225867888	225868030	ENSG00000196187	1:225867888-225868030	1:225867888-225868030	Non Conserved
ENSG00000196236_8-8	22	40881770	40882177	ENSG00000196236	22:40881770-40882177	22:40881770-40882177	Non Conserved
ENSG00000196277_13-13	3	7578422	7579357	ENSG00000196277	3:7578422-7579357	3:7578422-7579357	Non Conserved
ENSG00000196367_21-21	7	98917423	98917679	ENSG00000196367	7:98917423-98917679	7:98917423-98917679	Non Conserved
ENSG00000196367_38-38	7	98949660	98949841	ENSG00000196367	7:98949660-98949841	7:98949660-98949841	Non Conserved
ENSG00000196517_9-9	1	44008353	44008623	ENSG00000196517	1:44008353-44008623	1:44008353-44008623	Non Conserved
ENSG00000196632_22-22	X	54232809	54233020	ENSG00000196632	X:54232809-54233020	X:54232809-54233020	Non Conserved
ENSG00000196712_47-47	17	31325820	31326252	ENSG00000196712	17:31325820-31326252	17:31325820-31326252	Non Conserved
ENSG00000196943_3-3	14	24301612	24301722	ENSG00000196943	14:24301612-24301722	14:24301612-24301722	Non Conserved
ENSG00000197147_4-4	1	89582625	89584789	ENSG00000197147	1:89582625-89584789	1:89582625-89584789	Non Conserved
ENSG00000197226_7-7	5	179888103	179888312	ENSG00000197226	5:179888103-179888312	5:179888103-179888312	Non Conserved
ENSG00000197299_13-13	15	90766910	90767023	ENSG00000197299	15:90766910-90767023	15:90766910-90767023	Non Conserved
ENSG00000197386_47-45	4	3187651	3189093	ENSG00000197386	4:3187651-3189093	4:3187651-3189093	Non Conserved
ENSG00000197555_21-21	14	71709222	71709664	ENSG00000197555	14:71709222-71709664	14:71709222-71709664	Non Conserved
ENSG00000197580_15-11	11	112193474	112194755	ENSG00000197580	11:112193474-112194755	11:112193474-112194755	Non Conserved
ENSG00000197712_11-11	4	38914921	38915073	ENSG00000197712	4:38914921-38915073	4:38914921-38915073	Non Conserved
ENSG00000197724_3-3	9	93636411	93636525	ENSG00000197724	9:93636411-93636525	9:93636411-93636525	Non Conserved
ENSG00000197885_6-6	3	23900808	23901049	ENSG00000197885	3:23900808-23901049	3:23900808-23901049	Non Conserved
ENSG00000197943_4-4	16	81854444	81854587	ENSG00000197943	16:81854444-81854587	16:81854444-81854587	Non Conserved
ENSG00000198408_5-5	10	101807730	101807901	ENSG00000198408	10:101807730-101807901	10:101807730-101807901	Non Conserved
ENSG00000198626_72-72	1	237717198	237717368	ENSG00000198626	1:237717198-237717368	1:237717198-237717368	Non Conserved
ENSG00000198707_35-35	12	88089032	88089487	ENSG00000198707	12:88089032-88089487	12:88089032-88089487	Non Conserved
ENSG00000198785_2-2	9	101686596	101687200	ENSG00000198785	9:101686596-101687200	9:101686596-101687200	Non Conserved
ENSG00000198795_8-8	18	25224345	25227697	ENSG00000198795	18:25224345-25227697	18:25224345-25227697	Non Conserved
ENSG00000204138_13-13	1	28473554	28474151	ENSG00000204138	1:28473554-28474151	1:28473554-28474151	Non Conserved
ENSG00000204138_15-15	1	28480451	28480604	ENSG00000204138	1:28480451-28480604	1:28480451-28480604	Non Conserved
ENSG00000204217_4-4	2	202467519	202467689	ENSG00000204217	2:202467519-202467689	2:202467519-202467689	Non Conserved
ENSG00000204217_7-7	2	202518822	202519052	ENSG00000204217	2:202518822-202519052	2:202518822-202519052	Non Conserved
ENSG00000204569_16-16	6	30604353	30604511	ENSG00000204569	6:30604353-30604511	6:30604353-30604511	Non Conserved
ENSG00000204634_10-10	2	101033544	101033758	ENSG00000204634	2:101033544-101033758	2:101033544-101033758	Non Conserved
ENSG00000205189_6-6	8	80499494	80500382	ENSG00000205189	8:80499494-80500382	8:80499494-80500382	Non Conserved
ENSG00000214050_10-10	8	28452244	28452476	ENSG00000214050	8:28452244-28452476	8:28452244-28452476	Non Conserved
ENSG00000214944_11-11	5	73840480	73840760	ENSG00000214944	5:73840480-73840760	5:73840480-73840760	Non Conserved
ENSG00000243943_18-18	2	27607845	27608039	ENSG00000243943	2:27607845-27608039	2:27607845-27608039	Non Conserved
ENSG00000253710_5-5	13	52018913	52019143	ENSG00000253710	13:52018913-52019143	13:52018913-52019143	Non Conserved
ENSG00000257923_29-29	7	102201360	102202204	ENSG00000257923	7:102201360-102202204	7:102201360-102202204	Non Conserved
ENSG00000275835_18-18	15	23011133	23011331	ENSG00000275835	15:23011133-23011331	15:23011133-23011331	Non Conserved
ENSG00000276234_8-8	17	37440505	37440662	ENSG00000276234	17:37440505-37440662	17:37440505-37440662	Non Conserved
ENSG00000002016_16-13	12	929886	930051	ENSG00000002016	12:929819-930144	12:929819-930144	Non Conserved
ENSG00000002016_17-13	12	929818	930051	ENSG00000002016	12:929764-930144	12:929764-930144	Non Conserved
ENSG00000011243_16-13	19	15400358	15400947	ENSG00000011243	19:15400400-15400864	19:15400400-15400864	Non Conserved
ENSG00000013441_22-18	2	200856811	200857973	ENSG00000013441	2:200856891-200857884	2:200856891-200857884	Non Conserved
ENSG00000068903_18-12	19	38889155	38890103	ENSG00000068903	19:38889087-38890144	19:38889087-38890144	Non Conserved
ENSG00000078070_13-12	3	183071120	183071210	ENSG00000078070	3:183071048-183071144	3:183071048-183071144	Non Conserved
ENSG00000100417_10-5	22	41584005	41584527	ENSG00000100417	22:41584006-41584603	22:41584006-41584603	Non Conserved
ENSG00000103174_26-23	16	5027198	5027290	ENSG00000103174	16:5027135-5027379	16:5027135-5027379	Non Conserved
ENSG00000104812_15-14	19	48970709	48970928	ENSG00000104812	19:48970750-48971023	19:48970750-48971023	Non Conserved
ENSG00000105329_8-5	19	41342020	41342170	ENSG00000105329	19:41342021-41342247	19:41342021-41342247	Non Conserved
ENSG00000105821_22-21	7	103319678	103319756	ENSG00000105821	7:103319609-103319776	7:103319609-103319776	Non Conserved
ENSG00000112983_27-26	5	138161864	138162054	ENSG00000112983	5:138161796-138162087	5:138161796-138162087	Non Conserved
ENSG00000118263_9-7	2	207123975	207124344	ENSG00000118263	2:207123898-207124404	2:207123898-207124404	Non Conserved
ENSG00000124459_6-5	19	43924310	43924402	ENSG00000124459	19:43924238-43924312	19:43924238-43924312	Non Conserved
ENSG00000126746_8-7	12	6679183	6679455	ENSG00000126746	12:6679220-6679525	12:6679220-6679525	Non Conserved
ENSG00000127990_131-124	7	94587809	94588708	ENSG00000127990	7:94587778-94588732	7:94587778-94588732	Non Conserved
ENSG00000129347_19-15	19	10559529	10559831	ENSG00000129347	19:10559613-10559830	19:10559613-10559830	Non Conserved
ENSG00000131459_7-4	5	180335868	180336479	ENSG00000131459	5:180335869-180336577	5:180335869-180336577	Non Conserved
ENSG00000132323_7-5	2	238194331	238194805	ENSG00000132323	2:238194275-238194870	2:238194275-238194870	Non Conserved
ENSG00000138346_24-22	10	68422429	68422697	ENSG00000138346	10:68422515-68422604	10:68422515-68422604	Non Conserved
ENSG00000140694_12-10	16	14627136	14627269	ENSG00000140694	16:14627106-14627174	16:14627106-14627174	Non Conserved
ENSG00000140694_12-8	16	14627136	14628191	ENSG00000140694	16:14627106-14628251	16:14627106-14628251	Non Conserved
ENSG00000146263_16-11	6	97269992	97272975	ENSG00000146263	6:97269902-97272881	6:97269902-97272881	Non Conserved
ENSG00000152465_4-3	10	15141029	15141422	ENSG00000152465	10:15140987-15141353	10:15140987-15141353	Non Conserved
ENSG00000156374_8-6	10	103347297	103347395	ENSG00000156374	10:103347238-103347319	10:103347238-103347319	Non Conserved
ENSG00000161010_12-10	5	179853276	179853378	ENSG00000161010	5:179853197-179853437	5:179853197-179853437	Non Conserved
ENSG00000163481_8-3	2	218667981	218668605	ENSG00000163481	2:218668079-218668679	2:218668079-218668679	Non Conserved
ENSG00000166526_20-15	7	100075229	100075542	ENSG00000166526	7:100075135-100075630	7:100075135-100075630	Non Conserved
ENSG00000170581_29-28	12	56349425	56349426	ENSG00000170581	12:56349345-56349509	12:56349345-56349509	Non Conserved
ENSG00000170949_11-7	19	53091497	53091637	ENSG00000170949	19:53091413-53091553	19:53091413-53091553	Non Conserved
ENSG00000179115_14-10	19	12928397	12928755	ENSG00000179115	19:12928398-12928663	19:12928398-12928663	Non Conserved
ENSG00000186635_13-9	11	72712339	72713176	ENSG00000186635	11:72712438-72713151	11:72712438-72713151	Non Conserved
ENSG00000189339_14-11	1	1669736	1670140	ENSG00000189339	1:1669664-1670139	1:1669664-1670139	Non Conserved
ENSG00000000460_23-17	1	169802621	169806088	ENSG00000000460	1:169802621-169802725	1:169806004-169806088	Non Conserved
ENSG00000000460_27-23	1	169806004	169827199	ENSG00000000460	1:169806004-169806088	1:169827051-169827199	Non Conserved
ENSG00000000460_38-33	1	169836927	169850327	ENSG00000000460	1:169836927-169837112	1:169850265-169850327	Non Conserved
ENSG00000001167_9-6	6	41090204	41094497	ENSG00000001167	6:41090204-41090309	6:41094396-41094497	Non Conserved
ENSG00000001461_12-8	1	24440172	24453504	ENSG00000001461	1:24440172-24440240	1:24453408-24453504	Non Conserved
ENSG00000001617_11-7	3	50173793	50176861	ENSG00000001617	3:50173793-50173953	3:50176768-50176861	Non Conserved
ENSG00000002746_22-19	7	43450828	43466568	ENSG00000002746	7:43450828-43450929	7:43466447-43466568	Non Conserved
ENSG00000002746_22-20	7	43456297	43466568	ENSG00000002746	7:43456297-43456447	7:43466447-43466568	Non Conserved
ENSG00000002746_24-20	7	43456297	43479744	ENSG00000002746	7:43456297-43456447	7:43479608-43479744	Non Conserved
ENSG00000002746_24-22	7	43466447	43479744	ENSG00000002746	7:43466447-43466568	7:43479608-43479744	Non Conserved
ENSG00000002746_24-23	7	43468920	43479744	ENSG00000002746	7:43468920-43469105	7:43479608-43479744	Non Conserved
ENSG00000002746_26-19	7	43450828	43493180	ENSG00000002746	7:43450828-43450929	7:43493084-43493180	Non Conserved
ENSG00000002746_26-21	7	43463660	43493180	ENSG00000002746	7:43463660-43463799	7:43493084-43493180	Non Conserved
ENSG00000002746_28-20	7	43456297	43501322	ENSG00000002746	7:43456297-43456447	7:43501213-43501322	Non Conserved
ENSG00000002746_28-21	7	43463660	43501322	ENSG00000002746	7:43463660-43463799	7:43501213-43501322	Non Conserved
ENSG00000002746_28-22	7	43466447	43501322	ENSG00000002746	7:43466447-43466568	7:43501213-43501322	Non Conserved
ENSG00000002746_28-25	7	43492075	43501322	ENSG00000002746	7:43492075-43492180	7:43501213-43501322	Non Conserved
ENSG00000002746_29-19	7	43450828	43507257	ENSG00000002746	7:43450828-43450929	7:43507137-43507257	Non Conserved
ENSG00000002746_31-20	7	43456297	43509121	ENSG00000002746	7:43456297-43456447	7:43508969-43509121	Non Conserved
ENSG00000002746_31-21	7	43463660	43509121	ENSG00000002746	7:43463660-43463799	7:43508969-43509121	Non Conserved
ENSG00000002746_33-19	7	43450828	43541998	ENSG00000002746	7:43450828-43450929	7:43541869-43541998	Non Conserved
ENSG00000002746_33-20	7	43456297	43541998	ENSG00000002746	7:43456297-43456447	7:43541869-43541998	Non Conserved
ENSG00000003756_17-16	3	50105077	50105709	ENSG00000003756	3:50105077-50105142	3:50105549-50105709	Non Conserved
ENSG00000003756_17-7	3	50093720	50105709	ENSG00000003756	3:50093720-50093783	3:50105549-50105709	Non Conserved
ENSG00000003756_17-9	3	50099982	50105709	ENSG00000003756	3:50099982-50100004	3:50105549-50105709	Non Conserved
ENSG00000003756_23-19	3	50106767	50108304	ENSG00000003756	3:50106767-50106801	3:50108232-50108304	Non Conserved
ENSG00000003756_24-19	3	50106767	50109688	ENSG00000003756	3:50106767-50106801	3:50109603-50109688	Non Conserved
ENSG00000003756_24-22	3	50108070	50109688	ENSG00000003756	3:50108070-50108147	3:50109603-50109688	Non Conserved
ENSG00000004468_12-7	4	15824881	15840538	ENSG00000004468	4:15824881-15824998	4:15840452-15840538	Non Conserved
ENSG00000004468_7-5	4	15816511	15825016	ENSG00000004468	4:15816511-15816640	4:15824881-15825016	Non Conserved
ENSG00000004487_13-7	1	23055069	23069151	ENSG00000004487	1:23055069-23055161	1:23069061-23069151	Non Conserved
ENSG00000004487_9-7	1	23055069	23057565	ENSG00000004487	1:23055069-23055161	1:23057484-23057565	Non Conserved
ENSG00000004766_30-5	7	93239866	93297243	ENSG00000004766	7:93239866-93239934	7:93297145-93297243	Non Conserved
ENSG00000004766_31-9	7	93253860	93303550	ENSG00000004766	7:93253860-93253931	7:93303460-93303550	Non Conserved
ENSG00000004766_34-11	7	93256509	93311272	ENSG00000004766	7:93256509-93256562	7:93311166-93311272	Non Conserved
ENSG00000004766_34-22	7	93271220	93311272	ENSG00000004766	7:93271220-93271262	7:93311166-93311272	Non Conserved
ENSG00000004766_34-31	7	93303460	93311272	ENSG00000004766	7:93303460-93303550	7:93311166-93311272	Non Conserved
ENSG00000004766_36-25	7	93276165	93323732	ENSG00000004766	7:93276165-93276305	7:93323250-93323732	Non Conserved
ENSG00000004766_37-22	7	93271220	93334197	ENSG00000004766	7:93271220-93271262	7:93334117-93334197	Non Conserved
ENSG00000004766_37-31	7	93303460	93334197	ENSG00000004766	7:93303460-93303550	7:93334117-93334197	Non Conserved
ENSG00000004766_39-12	7	93257394	93341575	ENSG00000004766	7:93257394-93257450	7:93341427-93341575	Non Conserved
ENSG00000004766_39-8	7	93252653	93341575	ENSG00000004766	7:93252653-93252775	7:93341427-93341575	Non Conserved
ENSG00000004766_44-40	7	93348711	93353761	ENSG00000004766	7:93348711-93348798	7:93353640-93353761	Non Conserved
ENSG00000004866_16-13	7	117134124	117170976	ENSG00000004866	7:117134124-117134192	7:117170862-117170976	Non Conserved
ENSG00000004866_18-14	7	117136081	117190936	ENSG00000004866	7:117136081-117136235	7:117190834-117190936	Non Conserved
ENSG00000004866_18-7	7	117099762	117190936	ENSG00000004866	7:117099762-117099839	7:117190834-117190936	Non Conserved
ENSG00000004866_22-17	7	117189321	117209937	ENSG00000004866	7:117189321-117189393	7:117209787-117209937	Non Conserved
ENSG00000004866_24-21	7	117209787	117222062	ENSG00000004866	7:117209787-117209922	7:117221923-117222062	Non Conserved
ENSG00000004866_24-23	7	117219084	117222062	ENSG00000004866	7:117219084-117219090	7:117221923-117222062	Non Conserved
ENSG00000005007_23-3	19	18845980	18863612	ENSG00000005007	19:18845980-18846119	19:18862933-18863612	Non Conserved
ENSG00000005156_32-29	17	34998604	34999856	ENSG00000005156	17:34998604-34998671	17:34999782-34999856	Non Conserved
ENSG00000005189_12-8	16	20813190	20821902	ENSG00000005189	16:20813190-20813302	16:20821762-20821902	Non Conserved
ENSG00000005189_17-12	16	20821762	20828537	ENSG00000005189	16:20821762-20821771	16:20828435-20828537	Non Conserved
ENSG00000005189_18-12	16	20821762	20832259	ENSG00000005189	16:20821762-20821771	16:20832156-20832259	Non Conserved
ENSG00000005189_19-14	16	20825833	20833123	ENSG00000005189	16:20825833-20825871	16:20833003-20833123	Non Conserved
ENSG00000005469_11-7	7	87359206	87361852	ENSG00000005469	7:87359206-87359330	7:87361728-87361852	Non Conserved
ENSG00000005469_25-22	7	87391589	87393067	ENSG00000005469	7:87391589-87391712	7:87392948-87393067	Non Conserved
ENSG00000005483_25-16	7	105073619	105081797	ENSG00000005483	7:105073619-105073677	7:105081688-105081797	Non Conserved
ENSG00000005483_27-15	7	105066727	105091314	ENSG00000005483	7:105066727-105066807	7:105091216-105091314	Non Conserved
ENSG00000005483_27-16	7	105073619	105091314	ENSG00000005483	7:105073619-105073677	7:105091216-105091314	Non Conserved
ENSG00000005483_27-24	7	105078846	105091314	ENSG00000005483	7:105078846-105078963	7:105091216-105091314	Non Conserved
ENSG00000005483_27-26	7	105090009	105091314	ENSG00000005483	7:105090009-105090106	7:105091216-105091314	Non Conserved
ENSG00000005483_27-6	7	105038126	105091314	ENSG00000005483	7:105038126-105038199	7:105091216-105091314	Non Conserved
ENSG00000005483_27-7	7	105040839	105091314	ENSG00000005483	7:105040839-105041023	7:105091216-105091314	Non Conserved
ENSG00000005483_31-24	7	105078846	105102194	ENSG00000005483	7:105078846-105078963	7:105101886-105102194	Non Conserved
ENSG00000006125_15-12	17	35624397	35627726	ENSG00000006125	17:35624397-35624587	17:35627631-35627726	Non Conserved
ENSG00000006125_16-12	17	35624397	35636456	ENSG00000006125	17:35624397-35624587	17:35636341-35636456	Non Conserved
ENSG00000006576_16-11	7	77900711	77910409	ENSG00000006576	7:77900711-77900780	7:77908935-77910409	Non Conserved
ENSG00000006576_16-9	7	77893608	77910409	ENSG00000006576	7:77893608-77893664	7:77908935-77910409	Non Conserved
ENSG00000006576_18-17	7	77920279	77922778	ENSG00000006576	7:77920279-77920465	7:77922623-77922778	Non Conserved
ENSG00000006576_18-9	7	77893608	77922778	ENSG00000006576	7:77893608-77893664	7:77922623-77922778	Non Conserved
ENSG00000006576_22-9	7	77893608	77937838	ENSG00000006576	7:77893608-77893664	7:77937710-77937838	Non Conserved
ENSG00000006576_24-15	7	77908793	77940302	ENSG00000006576	7:77908793-77908958	7:77940030-77940302	Non Conserved
ENSG00000006576_27-22	7	77937710	77942786	ENSG00000006576	7:77937710-77937838	7:77942700-77942786	Non Conserved
ENSG00000006576_29-17	7	77920279	77951712	ENSG00000006576	7:77920279-77920465	7:77951617-77951712	Non Conserved
ENSG00000006576_30-21	7	77929109	77953894	ENSG00000006576	7:77929109-77929327	7:77953769-77953894	Non Conserved
ENSG00000006576_30-28	7	77949678	77953894	ENSG00000006576	7:77949678-77949833	7:77953769-77953894	Non Conserved
ENSG00000006607_10-9	2	241407537	241411130	ENSG00000006607	2:241407537-241407608	2:241410941-241411130	Non Conserved
ENSG00000006607_12-9	2	241407537	241418109	ENSG00000006607	2:241407537-241407608	2:241417962-241418109	Non Conserved
ENSG00000006607_13-11	2	241413307	241431774	ENSG00000006607	2:241413307-241413421	2:241431679-241431774	Non Conserved
ENSG00000006607_13-9	2	241407537	241431774	ENSG00000006607	2:241407537-241407608	2:241431679-241431774	Non Conserved
ENSG00000006607_17-10	2	241411033	241436538	ENSG00000006607	2:241411033-241411130	2:241436481-241436538	Non Conserved
ENSG00000006607_17-13	2	241431679	241436538	ENSG00000006607	2:241431679-241431774	2:241436481-241436538	Non Conserved
ENSG00000006607_17-16	2	241434962	241436538	ENSG00000006607	2:241434962-241435030	2:241436481-241436538	Non Conserved
ENSG00000006607_18-10	2	241411033	241441556	ENSG00000006607	2:241411033-241411130	2:241441304-241441556	Non Conserved
ENSG00000006607_29-21	2	241456747	241468377	ENSG00000006607	2:241456747-241456922	2:241468140-241468377	Non Conserved
ENSG00000006607_29-22	2	241462523	241468377	ENSG00000006607	2:241462523-241462612	2:241468140-241468377	Non Conserved
ENSG00000006607_30-21	2	241456747	241475987	ENSG00000006607	2:241456747-241456922	2:241475857-241475987	Non Conserved
ENSG00000006607_30-29	2	241468140	241475987	ENSG00000006607	2:241468140-241468320	2:241475857-241475987	Non Conserved
ENSG00000006607_32-30	2	241475857	241484331	ENSG00000006607	2:241475857-241475987	2:241484090-241484331	Non Conserved
ENSG00000006740_11-9	17	12928929	12943669	ENSG00000006740	17:12928929-12929046	17:12943588-12943669	Non Conserved
ENSG00000006740_12-4	17	12894940	12944196	ENSG00000006740	17:12894940-12894979	17:12944069-12944196	Non Conserved
ENSG00000006740_12-6	17	12908897	12944196	ENSG00000006740	17:12908897-12908973	17:12944069-12944196	Non Conserved
ENSG00000006740_15-10	17	12941056	12952581	ENSG00000006740	17:12941056-12941124	17:12952501-12952581	Non Conserved
ENSG00000006740_15-13	17	12949140	12952581	ENSG00000006740	17:12949140-12949251	17:12952501-12952581	Non Conserved
ENSG00000006740_18-11	17	12943588	12958897	ENSG00000006740	17:12943588-12943669	17:12958717-12958897	Non Conserved
ENSG00000006740_5-4	17	12894940	12896511	ENSG00000006740	17:12894940-12894979	17:12896407-12896511	Non Conserved
ENSG00000006740_9-5	17	12896407	12929046	ENSG00000006740	17:12896407-12896511	17:12928929-12929046	Non Conserved
ENSG00000006740_9-7	17	12915900	12929046	ENSG00000006740	17:12915900-12916011	17:12928929-12929046	Non Conserved
ENSG00000007174_13-4	17	11608129	11636784	ENSG00000007174	17:11608129-11608325	17:11636634-11636784	Non Conserved
ENSG00000007174_21-20	17	11669064	11669794	ENSG00000007174	17:11669064-11669260	17:11669370-11669794	Non Conserved
ENSG00000007174_39-37	17	11752833	11757692	ENSG00000007174	17:11752833-11752960	17:11757545-11757692	Non Conserved
ENSG00000007174_57-31	17	11719334	11875184	ENSG00000007174	17:11719334-11719490	17:11874949-11875184	Non Conserved
ENSG00000007174_6-4	17	11608129	11611780	ENSG00000007174	17:11608129-11608325	17:11611650-11611780	Non Conserved
ENSG00000007174_68-58	17	11880078	11905809	ENSG00000007174	17:11880078-11880200	17:11905661-11905809	Non Conserved
ENSG00000007174_9-4	17	11608129	11619781	ENSG00000007174	17:11608129-11608325	17:11619548-11619781	Non Conserved
ENSG00000008083_18-14	6	15511296	15517268	ENSG00000008083	6:15511296-15511401	6:15517161-15517268	Non Conserved
ENSG00000008083_7-6	6	15468542	15487542	ENSG00000008083	6:15468542-15468718	6:15487307-15487542	Non Conserved
ENSG00000008086_11-8	X	18575354	18584353	ENSG00000008086	X:18575354-18575390	X:18584263-18584353	Non Conserved
ENSG00000008086_13-7	X	18564477	18588143	ENSG00000008086	X:18564477-18564522	X:18587954-18588143	Non Conserved
ENSG00000008086_13-8	X	18575354	18588143	ENSG00000008086	X:18575354-18575390	X:18587954-18588143	Non Conserved
ENSG00000008086_17-16	X	18598462	18604868	ENSG00000008086	X:18598462-18598613	X:18603902-18604868	Non Conserved
ENSG00000008086_20-18	X	18608811	18613275	ENSG00000008086	X:18608811-18608912	X:18613152-18613275	Non Conserved
ENSG00000008086_21-18	X	18608811	18619966	ENSG00000008086	X:18608811-18608912	X:18619867-18619966	Non Conserved
ENSG00000008086_21-7	X	18564477	18619966	ENSG00000008086	X:18564477-18564522	X:18619867-18619966	Non Conserved
ENSG00000008226_8-3	3	38059742	38063919	ENSG00000008226	3:38059742-38059852	3:38063841-38063919	Non Conserved
ENSG00000008382_9-7	19	4352897	4354420	ENSG00000008382	19:4352897-4353029	19:4354324-4354420	Non Conserved
ENSG00000008441_11-10	19	13075535	13078735	ENSG00000008441	19:13075535-13075671	19:13078613-13078735	Non Conserved
ENSG00000008853_14-12	8	23010538	23015743	ENSG00000008853	8:23010538-23010641	8:23015638-23015743	Non Conserved
ENSG00000009335_18-5	7	157163810	157207935	ENSG00000009335	7:157163810-157163863	7:157207703-157207935	Non Conserved
ENSG00000009335_19-12	7	157183878	157216971	ENSG00000009335	7:157183878-157184029	7:157216867-157216971	Non Conserved
ENSG00000009335_19-15	7	157201721	157216971	ENSG00000009335	7:157201721-157201807	7:157216867-157216971	Non Conserved
ENSG00000009335_30-22	7	157220689	157248580	ENSG00000009335	7:157220689-157220776	7:157248368-157248580	Non Conserved
ENSG00000009335_35-22	7	157220689	157257044	ENSG00000009335	7:157220689-157220776	7:157256687-157257044	Non Conserved
ENSG00000009335_7-6	7	157169048	157170450	ENSG00000009335	7:157169048-157169122	7:157170304-157170450	Non Conserved
ENSG00000009780_10-9	1	27744654	27749154	ENSG00000009780	1:27744654-27744811	1:27749068-27749154	Non Conserved
ENSG00000011021_14-9	1	11823707	11827221	ENSG00000011021	1:11823707-11823833	1:11827089-11827221	Non Conserved
ENSG00000011021_24-9	1	11823707	11836153	ENSG00000011021	1:11823707-11823833	1:11835967-11836153	Non Conserved
ENSG00000011295_10-8	17	16002793	16004262	ENSG00000011295	17:16002793-16002831	17:16004201-16004262	Non Conserved
ENSG00000011295_10-9	17	16003831	16004262	ENSG00000011295	17:16003831-16003853	17:16004201-16004262	Non Conserved
ENSG00000011304_13-7	19	803561	805187	ENSG00000011304	19:803561-803636	19:804858-805187	Non Conserved
ENSG00000011376_10-6	3	45400245	45458886	ENSG00000011376	3:45400245-45400353	3:45458743-45458886	Non Conserved
ENSG00000011376_10-7	3	45417482	45458886	ENSG00000011376	3:45417482-45417573	3:45458743-45458886	Non Conserved
ENSG00000011376_12-7	3	45417482	45476627	ENSG00000011376	3:45417482-45417573	3:45476468-45476627	Non Conserved
ENSG00000011426_18-16	7	36423817	36424742	ENSG00000011426	7:36423817-36423943	7:36424686-36424742	Non Conserved
ENSG00000011426_19-13	7	36420597	36425740	ENSG00000011426	7:36420597-36420744	7:36425702-36425740	Non Conserved
ENSG00000011426_21-14	7	36421857	36427028	ENSG00000011426	7:36421857-36421992	7:36426916-36427028	Non Conserved
ENSG00000011426_21-9	7	36415758	36427028	ENSG00000011426	7:36415758-36415783	7:36426916-36427028	Non Conserved
ENSG00000011426_22-19	7	36425702	36439290	ENSG00000011426	7:36425702-36425740	7:36439204-36439290	Non Conserved
ENSG00000011426_23-11	7	36419244	36443862	ENSG00000011426	7:36419244-36419479	7:36443755-36443862	Non Conserved
ENSG00000011454_13-9	9	122996041	123010528	ENSG00000011454	9:122996041-122996151	9:123010354-123010528	Non Conserved
ENSG00000011454_14-13	9	123010354	123015636	ENSG00000011454	9:123010354-123010528	9:123015543-123015636	Non Conserved
ENSG00000011454_20-12	9	122998597	123065461	ENSG00000011454	9:122998597-122998766	9:123065348-123065461	Non Conserved
ENSG00000011454_20-13	9	123010354	123065461	ENSG00000011454	9:123010354-123010528	9:123065348-123065461	Non Conserved
ENSG00000011454_20-9	9	122996041	123065461	ENSG00000011454	9:122996041-122996151	9:123065348-123065461	Non Conserved
ENSG00000011454_27-20	9	123065348	123076762	ENSG00000011454	9:123065348-123065461	9:123076634-123076762	Non Conserved
ENSG00000011454_27-22	9	123070350	123076762	ENSG00000011454	9:123070350-123070424	9:123076634-123076762	Non Conserved
ENSG00000011454_27-9	9	122996041	123076762	ENSG00000011454	9:122996041-122996151	9:123076634-123076762	Non Conserved
ENSG00000011454_29-20	9	123065348	123090385	ENSG00000011454	9:123065348-123065461	9:123090275-123090385	Non Conserved
ENSG00000011454_29-24	9	123073552	123090385	ENSG00000011454	9:123073552-123073677	9:123090275-123090385	Non Conserved
ENSG00000011454_32-22	9	123070350	123099549	ENSG00000011454	9:123070350-123070424	9:123099478-123099549	Non Conserved
ENSG00000011454_32-28	9	123089758	123099549	ENSG00000011454	9:123089758-123089850	9:123099478-123099549	Non Conserved
ENSG00000011454_33-20	9	123065348	123101763	ENSG00000011454	9:123065348-123065461	9:123101566-123101763	Non Conserved
ENSG00000011454_8-7	9	122989297	122990213	ENSG00000011454	9:122989297-122989471	9:122990056-122990213	Non Conserved
ENSG00000011485_5-4	19	46375604	46376574	ENSG00000011485	19:46375604-46375751	19:46376453-46376574	Non Conserved
ENSG00000013288_11-6	4	6586996	6594732	ENSG00000013288	4:6586996-6587168	4:6594534-6594732	Non Conserved
ENSG00000013288_9-7	4	6589045	6593350	ENSG00000013288	4:6589045-6589160	4:6593173-6593350	Non Conserved
ENSG00000013503_17-10	12	106380031	106433872	ENSG00000013503	12:106380031-106380139	12:106433719-106433872	Non Conserved
ENSG00000013503_17-14	12	106427197	106433872	ENSG00000013503	12:106427197-106427267	12:106433719-106433872	Non Conserved
ENSG00000013503_19-11	12	106393031	106437779	ENSG00000013503	12:106393031-106393153	12:106437681-106437779	Non Conserved
ENSG00000013503_22-15	12	106430273	106457296	ENSG00000013503	12:106430273-106430473	12:106457138-106457296	Non Conserved
ENSG00000013503_24-18	12	106437057	106463620	ENSG00000013503	12:106437057-106437131	12:106463478-106463620	Non Conserved
ENSG00000013503_7-3	12	106363870	106369683	ENSG00000013503	12:106363870-106363902	12:106369583-106369683	Non Conserved
ENSG00000013503_9-6	12	106369275	106378384	ENSG00000013503	12:106369275-106369350	12:106378267-106378384	Non Conserved
ENSG00000014824_10-9	4	42022838	42023384	ENSG00000014824	4:42022838-42022930	4:42023302-42023384	Non Conserved
ENSG00000014824_13-11	4	42035275	42049479	ENSG00000014824	4:42035275-42035333	4:42049377-42049479	Non Conserved
ENSG00000014824_21-15	4	42062986	42078325	ENSG00000014824	4:42062986-42063121	4:42078212-42078325	Non Conserved
ENSG00000014824_21-4	4	42001616	42078325	ENSG00000014824	4:42001616-42001780	4:42078212-42078325	Non Conserved
ENSG00000014824_6-4	4	42001616	42018505	ENSG00000014824	4:42001616-42001780	4:42018389-42018505	Non Conserved
ENSG00000014824_7-4	4	42001616	42020515	ENSG00000014824	4:42001616-42001780	4:42020416-42020515	Non Conserved
ENSG00000017260_27-25	3	130967145	130969396	ENSG00000017260	3:130967145-130967198	3:130969292-130969396	Non Conserved
ENSG00000017260_28-18	3	130953821	130975488	ENSG00000017260	3:130953821-130953976	3:130975332-130975488	Non Conserved
ENSG00000017260_29-26	3	130967330	130979419	ENSG00000017260	3:130967330-130967419	3:130979249-130979419	Non Conserved
ENSG00000017260_38-31	3	130992951	131001314	ENSG00000017260	3:130992951-130993001	3:131001220-131001314	Non Conserved
ENSG00000017260_39-25	3	130967145	131001344	ENSG00000017260	3:130967145-130967198	3:131001220-131001344	Non Conserved
ENSG00000018236_18-8	12	40918639	40944170	ENSG00000018236	12:40918639-40918732	12:40943995-40944170	Non Conserved
ENSG00000018510_11-6	2	177440965	177482186	ENSG00000018510	2:177440965-177441036	2:177482059-177482186	Non Conserved
ENSG00000018510_12-10	2	177468416	177493199	ENSG00000018510	2:177468416-177468524	2:177493148-177493199	Non Conserved
ENSG00000018510_14-11	2	177482059	177499730	ENSG00000018510	2:177482059-177482186	2:177499618-177499730	Non Conserved
ENSG00000018510_14-7	2	177442407	177499730	ENSG00000018510	2:177442407-177442486	2:177499618-177499730	Non Conserved
ENSG00000018510_16-11	2	177482059	177508031	ENSG00000018510	2:177482059-177482186	2:177507970-177508031	Non Conserved
ENSG00000018510_19-11	2	177482059	177523805	ENSG00000018510	2:177482059-177482186	2:177523748-177523805	Non Conserved
ENSG00000018510_19-15	2	177505506	177523805	ENSG00000018510	2:177505506-177505575	2:177523748-177523805	Non Conserved
ENSG00000018510_19-17	2	177513819	177523805	ENSG00000018510	2:177513819-177513908	2:177523748-177523805	Non Conserved
ENSG00000018699_10-4	2	32640270	32702920	ENSG00000018699	2:32640270-32640368	2:32702807-32702920	Non Conserved
ENSG00000018699_10-9	2	32678856	32702920	ENSG00000018699	2:32678856-32678922	2:32702807-32702920	Non Conserved
ENSG00000018699_12-10	2	32702807	32736816	ENSG00000018699	2:32702807-32702920	2:32736694-32736816	Non Conserved
ENSG00000018699_13-11	2	32733828	32758519	ENSG00000018699	2:32733828-32733921	2:32758292-32758519	Non Conserved
ENSG00000018699_15-10	2	32702807	32782678	ENSG00000018699	2:32702807-32702920	2:32782626-32782678	Non Conserved
ENSG00000018699_18-14	2	32777882	32812615	ENSG00000018699	2:32777882-32777980	2:32812504-32812615	Non Conserved
ENSG00000018699_18-15	2	32782626	32812615	ENSG00000018699	2:32782626-32782678	2:32812504-32812615	Non Conserved
ENSG00000018699_4-3	2	32633876	32640410	ENSG00000018699	2:32633876-32634005	2:32640270-32640410	Non Conserved
ENSG00000018699_7-3	2	32633876	32666768	ENSG00000018699	2:32633876-32634005	2:32666635-32666768	Non Conserved
ENSG00000018699_7-4	2	32640270	32666768	ENSG00000018699	2:32640270-32640368	2:32666635-32666768	Non Conserved
ENSG00000018699_7-6	2	32664303	32666768	ENSG00000018699	2:32664303-32664467	2:32666635-32666768	Non Conserved
ENSG00000018699_9-3	2	32633876	32678922	ENSG00000018699	2:32633876-32634005	2:32678856-32678922	Non Conserved
ENSG00000018699_9-5	2	32650131	32678922	ENSG00000018699	2:32650131-32650233	2:32678856-32678922	Non Conserved
ENSG00000018699_9-6	2	32664303	32678922	ENSG00000018699	2:32664303-32664467	2:32678856-32678922	Non Conserved
ENSG00000018699_9-8	2	32672272	32678922	ENSG00000018699	2:32672272-32672384	2:32678856-32678922	Non Conserved
ENSG00000020181_12-4	8	37828888	37834128	ENSG00000020181	8:37828888-37828959	8:37833967-37834128	Non Conserved
ENSG00000020181_8-4	8	37828888	37830923	ENSG00000020181	8:37828888-37828959	8:37830710-37830923	Non Conserved
ENSG00000020426_10-7	14	60808325	60818847	ENSG00000020426	14:60808325-60808428	14:60818722-60818847	Non Conserved
ENSG00000020426_11-7	14	60808325	60879835	ENSG00000020426	14:60808325-60808428	14:60879714-60879835	Non Conserved
ENSG00000020426_11-9	14	60811987	60879835	ENSG00000020426	14:60811987-60812127	14:60879714-60879835	Non Conserved
ENSG00000020577_18-13	14	54737024	54764540	ENSG00000020577	14:54737024-54737287	14:54764455-54764540	Non Conserved
ENSG00000020577_18-14	14	54748815	54764540	ENSG00000020577	14:54748815-54748924	14:54764455-54764540	Non Conserved
ENSG00000021574_35-29	2	32126948	32137188	ENSG00000021574	2:32126948-32127022	2:32137109-32137188	Non Conserved
ENSG00000021574_35-31	2	32128408	32137188	ENSG00000021574	2:32128408-32128479	2:32137109-32137188	Non Conserved
ENSG00000021574_36-25	2	32115702	32141946	ENSG00000021574	2:32115702-32115835	2:32141904-32141946	Non Conserved
ENSG00000021574_36-29	2	32126948	32141946	ENSG00000021574	2:32126948-32127022	2:32141904-32141946	Non Conserved
ENSG00000021574_39-34	2	32136877	32145007	ENSG00000021574	2:32136877-32136968	2:32144937-32145007	Non Conserved
ENSG00000021574_41-33	2	32136563	32147258	ENSG00000021574	2:32136563-32136638	2:32147195-32147258	Non Conserved
ENSG00000021645_12-9	14	78957242	78968346	ENSG00000021645	14:78957242-78957361	14:78968173-78968346	Non Conserved
ENSG00000021645_13-3	14	78645120	78988141	ENSG00000021645	14:78645120-78645421	14:78988022-78988141	Non Conserved
ENSG00000021645_13-9	14	78957242	78988141	ENSG00000021645	14:78957242-78957361	14:78988022-78988141	Non Conserved
ENSG00000021645_21-20	14	79467221	79663949	ENSG00000021645	14:79467221-79467402	14:79663778-79663949	Non Conserved
ENSG00000021645_23-20	14	79467221	79697937	ENSG00000021645	14:79467221-79467402	14:79697630-79697937	Non Conserved
ENSG00000021645_23-22	14	79692173	79697937	ENSG00000021645	14:79692173-79692262	14:79697630-79697937	Non Conserved
ENSG00000021645_24-22	14	79692173	79805190	ENSG00000021645	14:79692173-79692262	14:79805112-79805190	Non Conserved
ENSG00000021645_25-22	14	79692173	79805199	ENSG00000021645	14:79692173-79692262	14:79805112-79805199	Non Conserved
ENSG00000021645_25-23	14	79697630	79805199	ENSG00000021645	14:79697630-79697937	14:79805112-79805199	Non Conserved
ENSG00000021645_4-3	14	78645120	78651326	ENSG00000021645	14:78645120-78645421	14:78651165-78651326	Non Conserved
ENSG00000022840_19-16	12	120565072	120566980	ENSG00000022840	12:120565072-120565189	12:120566825-120566980	Non Conserved
ENSG00000022840_19-5	12	120557282	120566980	ENSG00000022840	12:120557282-120557368	12:120566825-120566980	Non Conserved
ENSG00000022840_20-16	12	120565072	120571291	ENSG00000022840	12:120565072-120565189	12:120571191-120571291	Non Conserved
ENSG00000022840_23-16	12	120565072	120575950	ENSG00000022840	12:120565072-120565189	12:120575792-120575950	Non Conserved
ENSG00000022840_7-5	12	120557282	120560886	ENSG00000022840	12:120557282-120557368	12:120560726-120560886	Non Conserved
ENSG00000023171_14-8	11	123577367	123596037	ENSG00000023171	11:123577367-123577577	11:123595942-123596037	Non Conserved
ENSG00000023330_12-11	3	52205839	52206751	ENSG00000023330	3:52205839-52206023	3:52206572-52206751	Non Conserved
ENSG00000023330_16-10	3	52204693	52212420	ENSG00000023330	3:52204693-52204915	3:52212258-52212420	Non Conserved
ENSG00000023516_9-5	13	42295695	42308609	ENSG00000023516	13:42295695-42295742	13:42308454-42308609	Non Conserved
ENSG00000023608_7-2	14	61766876	61778910	ENSG00000023608	14:61766876-61767035	14:61778848-61778910	Non Conserved
ENSG00000023608_8-6	14	61778072	61782397	ENSG00000023608	14:61778072-61778140	14:61782247-61782397	Non Conserved
ENSG00000023839_30-28	10	99834380	99842093	ENSG00000023839	10:99834380-99834535	10:99841967-99842093	Non Conserved
ENSG00000024048_11-7	6	42606589	42617338	ENSG00000024048	6:42606589-42606651	6:42617240-42617338	Non Conserved
ENSG00000024048_12-5	6	42603588	42617507	ENSG00000024048	6:42603588-42603718	6:42617409-42617507	Non Conserved
ENSG00000024048_12-8	6	42612171	42617507	ENSG00000024048	6:42612171-42612291	6:42617409-42617507	Non Conserved
ENSG00000024048_15-10	6	42616002	42632904	ENSG00000024048	6:42616002-42616090	6:42632805-42632904	Non Conserved
ENSG00000024048_15-7	6	42606589	42632904	ENSG00000024048	6:42606589-42606651	6:42632805-42632904	Non Conserved
ENSG00000024048_15-8	6	42612171	42632904	ENSG00000024048	6:42612171-42612291	6:42632805-42632904	Non Conserved
ENSG00000024048_15-9	6	42615071	42632904	ENSG00000024048	6:42615071-42615178	6:42632805-42632904	Non Conserved
ENSG00000024048_16-4	6	42594191	42635546	ENSG00000024048	6:42594191-42594304	6:42635418-42635546	Non Conserved
ENSG00000024048_18-17	6	42637011	42640270	ENSG00000024048	6:42637011-42637194	6:42640209-42640270	Non Conserved
ENSG00000024048_18-5	6	42603588	42640270	ENSG00000024048	6:42603588-42603718	6:42640209-42640270	Non Conserved
ENSG00000024048_19-17	6	42637011	42641692	ENSG00000024048	6:42637011-42637194	6:42641582-42641692	Non Conserved
ENSG00000024048_27-21	6	42644214	42652645	ENSG00000024048	6:42644214-42644336	6:42652491-42652645	Non Conserved
ENSG00000024048_27-26	6	42652023	42652645	ENSG00000024048	6:42652023-42652071	6:42652491-42652645	Non Conserved
ENSG00000024048_38-21	6	42644214	42670715	ENSG00000024048	6:42644214-42644336	6:42670660-42670715	Non Conserved
ENSG00000024048_4-2	6	42573734	42594304	ENSG00000024048	6:42573734-42573993	6:42594191-42594304	Non Conserved
ENSG00000024048_44-34	6	42663258	42679832	ENSG00000024048	6:42663258-42663419	6:42679724-42679832	Non Conserved
ENSG00000024048_44-43	6	42678539	42679832	ENSG00000024048	6:42678539-42678669	6:42679724-42679832	Non Conserved
ENSG00000024048_46-39	6	42673791	42684871	ENSG00000024048	6:42673791-42673887	6:42684794-42684871	Non Conserved
ENSG00000024048_46-41	6	42676056	42684871	ENSG00000024048	6:42676056-42676191	6:42684794-42684871	Non Conserved
ENSG00000024048_6-5	6	42603588	42605859	ENSG00000024048	6:42603588-42603718	6:42605721-42605859	Non Conserved
ENSG00000024048_7-3	6	42592151	42606651	ENSG00000024048	6:42592151-42592229	6:42606589-42606651	Non Conserved
ENSG00000024048_7-5	6	42603588	42606651	ENSG00000024048	6:42603588-42603718	6:42606589-42606651	Non Conserved
ENSG00000024048_8-5	6	42603588	42612291	ENSG00000024048	6:42603588-42603718	6:42612171-42612291	Non Conserved
ENSG00000024048_9-5	6	42603588	42615178	ENSG00000024048	6:42603588-42603718	6:42615071-42615178	Non Conserved
ENSG00000024048_9-8	6	42612171	42615178	ENSG00000024048	6:42612171-42612291	6:42615071-42615178	Non Conserved
ENSG00000025293_14-10	20	35842573	35863400	ENSG00000025293	20:35842573-35842744	20:35863013-35863400	Non Conserved
ENSG00000025293_15-11	20	35847350	35869551	ENSG00000025293	20:35847350-35847430	20:35869438-35869551	Non Conserved
ENSG00000025293_15-13	20	35858302	35869551	ENSG00000025293	20:35858302-35858381	20:35869438-35869551	Non Conserved
ENSG00000025293_15-14	20	35863013	35869551	ENSG00000025293	20:35863013-35863248	20:35869438-35869551	Non Conserved
ENSG00000025293_17-11	20	35847350	35871829	ENSG00000025293	20:35847350-35847430	20:35871650-35871829	Non Conserved
ENSG00000025293_18-10	20	35842573	35899648	ENSG00000025293	20:35842573-35842744	20:35899370-35899648	Non Conserved
ENSG00000025293_18-13	20	35858302	35899648	ENSG00000025293	20:35858302-35858381	20:35899370-35899648	Non Conserved
ENSG00000025293_18-14	20	35863013	35899648	ENSG00000025293	20:35863013-35863248	20:35899370-35899648	Non Conserved
ENSG00000025293_22-18	20	35899370	35914197	ENSG00000025293	20:35899370-35899525	20:35914033-35914197	Non Conserved
ENSG00000025293_23-18	20	35899370	35917662	ENSG00000025293	20:35899370-35899525	20:35917484-35917662	Non Conserved
ENSG00000025293_25-10	20	35842573	35931444	ENSG00000025293	20:35842573-35842744	20:35931249-35931444	Non Conserved
ENSG00000025434_26-20	11	47261241	47262018	ENSG00000025434	11:47261241-47262019	11:47261547-47262018	Non Conserved
ENSG00000028116_24-19	2	58086339	58135199	ENSG00000028116	2:58086339-58086426	2:58135141-58135199	Non Conserved
ENSG00000028116_26-19	2	58086339	58146474	ENSG00000028116	2:58086339-58086426	2:58146316-58146474	Non Conserved
ENSG00000028116_27-22	2	58123101	58154802	ENSG00000028116	2:58123101-58123233	2:58154754-58154802	Non Conserved
ENSG00000028137_8-7	1	12192863	12194032	ENSG00000028137	1:12192863-12193008	1:12193955-12194032	Non Conserved
ENSG00000028203_30-20	12	95262906	95282644	ENSG00000028203	12:95262906-95263059	12:95282313-95282644	Non Conserved
ENSG00000028203_35-20	12	95262906	95296258	ENSG00000028203	12:95262906-95263059	12:95296051-95296258	Non Conserved
ENSG00000028528_10-7	15	64118117	64123546	ENSG00000028528	15:64118117-64118244	15:64123503-64123546	Non Conserved
ENSG00000028528_25-6	15	64112573	64136932	ENSG00000028528	15:64112573-64112684	15:64136861-64136932	Non Conserved
ENSG00000028839_7-4	6	133982568	133984671	ENSG00000028839	6:133982568-133982650	6:133984577-133984671	Non Conserved
ENSG00000029725_11-10	17	5346790	5350629	ENSG00000029725	17:5346790-5346925	17:5350451-5350629	Non Conserved
ENSG00000029725_11-4	17	5308694	5350629	ENSG00000029725	17:5308694-5308802	17:5350451-5350629	Non Conserved
ENSG00000029725_11-7	17	5335184	5350629	ENSG00000029725	17:5335184-5335344	17:5350451-5350629	Non Conserved
ENSG00000029725_12-10	17	5346790	5354490	ENSG00000029725	17:5346790-5346925	17:5354359-5354490	Non Conserved
ENSG00000029725_12-4	17	5308694	5354490	ENSG00000029725	17:5308694-5308802	17:5354359-5354490	Non Conserved
ENSG00000029725_14-10	17	5346790	5363016	ENSG00000029725	17:5346790-5346925	17:5362912-5363016	Non Conserved
ENSG00000029725_14-9	17	5338019	5363016	ENSG00000029725	17:5338019-5338138	17:5362912-5363016	Non Conserved
ENSG00000029725_15-10	17	5346790	5365238	ENSG00000029725	17:5346790-5346925	17:5365122-5365238	Non Conserved
ENSG00000029725_16-10	17	5346790	5368468	ENSG00000029725	17:5346790-5346925	17:5368370-5368468	Non Conserved
ENSG00000029725_16-12	17	5354359	5368468	ENSG00000029725	17:5354359-5354490	17:5368370-5368468	Non Conserved
ENSG00000029725_17-15	17	5365122	5373454	ENSG00000029725	17:5365122-5365238	17:5373314-5373454	Non Conserved
ENSG00000029725_20-13	17	5361208	5378232	ENSG00000029725	17:5361208-5361629	17:5378177-5378232	Non Conserved
ENSG00000030304_8-6	9	110728688	110747800	ENSG00000030304	9:110728688-110728717	9:110747641-110747800	Non Conserved
ENSG00000031081_6-5	3	119382292	119383226	ENSG00000031081	3:119382292-119382399	3:119383084-119383226	Non Conserved
ENSG00000032219_11-9	14	58306022	58318805	ENSG00000032219	14:58306022-58306112	14:58318711-58318805	Non Conserved
ENSG00000032219_13-10	14	58318542	58328316	ENSG00000032219	14:58318542-58318621	14:58328237-58328316	Non Conserved
ENSG00000032219_14-9	14	58306022	58329604	ENSG00000032219	14:58306022-58306112	14:58329528-58329604	Non Conserved
ENSG00000032219_21-9	14	58306022	58351323	ENSG00000032219	14:58306022-58306112	14:58351073-58351323	Non Conserved
ENSG00000032219_22-10	14	58318542	58353855	ENSG00000032219	14:58318542-58318621	14:58353454-58353855	Non Conserved
ENSG00000032219_28-24	14	58360901	58367029	ENSG00000032219	14:58360901-58360991	14:58366883-58367029	Non Conserved
ENSG00000032444_50-48	19	7560648	7561317	ENSG00000032444	19:7560648-7560764	19:7561208-7561317	Non Conserved
ENSG00000032742_15-11	13	20596150	20601933	ENSG00000032742	13:20596150-20596240	13:20601705-20601933	Non Conserved
ENSG00000032742_19-15	13	20601705	20615879	ENSG00000032742	13:20601705-20601748	13:20615791-20615879	Non Conserved
ENSG00000032742_19-5	13	20574380	20615879	ENSG00000032742	13:20574380-20574475	13:20615791-20615879	Non Conserved
ENSG00000032742_20-5	13	20574380	20625849	ENSG00000032742	13:20574380-20574475	13:20625750-20625849	Non Conserved
ENSG00000032742_21-19	13	20615793	20631102	ENSG00000032742	13:20615793-20615879	13:20631016-20631102	Non Conserved
ENSG00000032742_21-7	13	20589811	20631102	ENSG00000032742	13:20589811-20589867	13:20631016-20631102	Non Conserved
ENSG00000032742_25-21	13	20631016	20643605	ENSG00000032742	13:20631016-20631102	13:20643455-20643605	Non Conserved
ENSG00000032742_25-23	13	20638332	20643605	ENSG00000032742	13:20638332-20638518	13:20643455-20643605	Non Conserved
ENSG00000032742_26-21	13	20631016	20644958	ENSG00000032742	13:20631016-20631102	13:20644843-20644958	Non Conserved
ENSG00000032742_28-23	13	20638332	20656430	ENSG00000032742	13:20638332-20638518	13:20656365-20656430	Non Conserved
ENSG00000032742_28-24	13	20641290	20656430	ENSG00000032742	13:20641290-20641398	13:20656365-20656430	Non Conserved
ENSG00000032742_28-26	13	20644843	20656430	ENSG00000032742	13:20644843-20644958	13:20656365-20656430	Non Conserved
ENSG00000032742_30-19	13	20615793	20663604	ENSG00000032742	13:20615793-20615879	13:20663265-20663604	Non Conserved
ENSG00000032742_31-21	13	20631016	20671039	ENSG00000032742	13:20631016-20631102	13:20670973-20671039	Non Conserved
ENSG00000032742_31-23	13	20638332	20671039	ENSG00000032742	13:20638332-20638518	13:20670973-20671039	Non Conserved
ENSG00000032742_31-28	13	20656365	20671039	ENSG00000032742	13:20656365-20656430	13:20670973-20671039	Non Conserved
ENSG00000032742_6-5	13	20574380	20583019	ENSG00000032742	13:20574380-20574475	13:20582957-20583019	Non Conserved
ENSG00000033122_11-7	1	69825748	69931570	ENSG00000033122	1:69825748-69825826	1:69931507-69931570	Non Conserved
ENSG00000033122_14-12	1	69980379	69994633	ENSG00000033122	1:69980379-69980453	1:69994561-69994633	Non Conserved
ENSG00000033122_14-5	1	69760191	69994633	ENSG00000033122	1:69760191-69760393	1:69994561-69994633	Non Conserved
ENSG00000033122_19-15	1	70011797	70021129	ENSG00000033122	1:70011797-70011926	1:70021005-70021129	Non Conserved
ENSG00000033122_24-17	1	70016465	70039793	ENSG00000033122	1:70016465-70016534	1:70038113-70039793	Non Conserved
ENSG00000033122_27-21	1	70028171	70076298	ENSG00000033122	1:70028171-70028371	1:70076077-70076298	Non Conserved
ENSG00000033122_27-26	1	70053026	70076298	ENSG00000033122	1:70053026-70053145	1:70076077-70076298	Non Conserved
ENSG00000033122_28-25	1	70043954	70089819	ENSG00000033122	1:70043954-70044094	1:70089727-70089819	Non Conserved
ENSG00000033122_28-27	1	70076077	70089819	ENSG00000033122	1:70076077-70076298	1:70089727-70089819	Non Conserved
ENSG00000033122_6-5	1	69760191	69792160	ENSG00000033122	1:69760191-69760393	1:69792043-69792160	Non Conserved
ENSG00000033122_9-5	1	69760191	69838283	ENSG00000033122	1:69760191-69760393	1:69838227-69838283	Non Conserved
ENSG00000033122_9-6	1	69792043	69838283	ENSG00000033122	1:69792043-69792160	1:69838227-69838283	Non Conserved
ENSG00000033122_9-8	1	69834780	69838283	ENSG00000033122	1:69834780-69834869	1:69838227-69838283	Non Conserved
ENSG00000033170_16-14	14	65615978	65617191	ENSG00000033170	14:65615978-65616093	14:65617090-65617191	Non Conserved
ENSG00000033170_18-17	14	65629492	65669480	ENSG00000033170	14:65629492-65629606	14:65669243-65669480	Non Conserved
ENSG00000033170_21-19	14	65721775	65733381	ENSG00000033170	14:65721775-65721858	14:65733231-65733381	Non Conserved
ENSG00000033627_10-9	17	42466429	42468107	ENSG00000033627	17:42466429-42466507	17:42468010-42468107	Non Conserved
ENSG00000033627_11-10	17	42468010	42470218	ENSG00000033627	17:42468010-42468093	17:42470090-42470218	Non Conserved
ENSG00000033800_10-6	15	68142290	68164804	ENSG00000033800	15:68142290-68142337	15:68164731-68164804	Non Conserved
ENSG00000033800_11-9	15	68153590	68173892	ENSG00000033800	15:68153590-68153695	15:68173732-68173892	Non Conserved
ENSG00000033800_13-5	15	68141946	68176654	ENSG00000033800	15:68141946-68142030	15:68176474-68176654	Non Conserved
ENSG00000033800_14-7	15	68145816	68181354	ENSG00000033800	15:68145816-68145906	15:68181211-68181354	Non Conserved
ENSG00000033800_14-9	15	68153590	68181354	ENSG00000033800	15:68153590-68153695	15:68181211-68181354	Non Conserved
ENSG00000033800_8-4	15	68086306	68146700	ENSG00000033800	15:68086306-68086750	15:68146566-68146700	Non Conserved
ENSG00000033800_9-5	15	68141946	68153695	ENSG00000033800	15:68141946-68142030	15:68153590-68153695	Non Conserved
ENSG00000033800_9-7	15	68145816	68153695	ENSG00000033800	15:68145816-68145906	15:68153590-68153695	Non Conserved
ENSG00000034693_10-5	6	143470961	143479198	ENSG00000034693	6:143470961-143471085	6:143479076-143479198	Non Conserved
ENSG00000034693_9-4	6	143468122	143474856	ENSG00000034693	6:143468122-143468165	6:143474786-143474856	Non Conserved
ENSG00000035403_10-8	10	74070670	74072852	ENSG00000035403	10:74070670-74070820	10:74072730-74072852	Non Conserved
ENSG00000035403_16-8	10	74070670	74090198	ENSG00000035403	10:74070670-74070820	10:74090023-74090198	Non Conserved
ENSG00000035403_17-8	10	74070670	74094461	ENSG00000035403	10:74070670-74070820	10:74094271-74094461	Non Conserved
ENSG00000035403_20-19	10	74097204	74101097	ENSG00000035403	10:74097204-74097332	10:74100948-74101097	Non Conserved
ENSG00000035403_29-20	10	74100948	74114899	ENSG00000035403	10:74100948-74101097	10:74114795-74114899	Non Conserved
ENSG00000038210_6-2	4	25252321	25260591	ENSG00000038210	4:25252321-25252475	4:25260524-25260591	Non Conserved
ENSG00000038210_7-5	4	25259037	25263849	ENSG00000038210	4:25259037-25259190	4:25263750-25263849	Non Conserved
ENSG00000038210_9-4	4	25256543	25269203	ENSG00000038210	4:25256543-25256674	4:25269144-25269203	Non Conserved
ENSG00000038295_11-4	4	165989381	166014560	ENSG00000038295	4:165989381-165989491	4:166014436-166014560	Non Conserved
ENSG00000038295_23-20	4	166060028	166078030	ENSG00000038295	4:166060028-166060188	4:166077903-166078030	Non Conserved
ENSG00000038295_23-21	4	166065683	166078030	ENSG00000038295	4:166065683-166065863	4:166077903-166078030	Non Conserved
ENSG00000038295_23-4	4	165989381	166078030	ENSG00000038295	4:165989381-165989491	4:166077903-166078030	Non Conserved
ENSG00000038295_24-21	4	166065683	166091341	ENSG00000038295	4:166065683-166065863	4:166091128-166091341	Non Conserved
ENSG00000038295_24-4	4	165989381	166091341	ENSG00000038295	4:165989381-165989491	4:166091128-166091341	Non Conserved
ENSG00000038358_26-15	16	67878360	67881180	ENSG00000038358	16:67878360-67878443	16:67881076-67881180	Non Conserved
ENSG00000038382_15-4	5	14270825	14316743	ENSG00000038382	5:14270825-14270899	5:14316513-14316743	Non Conserved
ENSG00000038382_17-12	5	14297072	14336727	ENSG00000038382	5:14297072-14297263	5:14336536-14336727	Non Conserved
ENSG00000038382_27-20	5	14363732	14381252	ENSG00000038382	5:14363732-14363927	5:14381130-14381252	Non Conserved
ENSG00000038532_14-10	16	11003074	11024921	ENSG00000038532	16:11003074-11003257	16:11024818-11024921	Non Conserved
ENSG00000038532_23-10	16	11003074	11061022	ENSG00000038532	16:11003074-11003257	16:11060902-11061022	Non Conserved
ENSG00000038532_27-22	16	11051513	11126146	ENSG00000038532	16:11051513-11051641	16:11125979-11126146	Non Conserved
ENSG00000038532_6-4	16	10969161	10973061	ENSG00000038532	16:10969161-10969309	16:10972938-10973061	Non Conserved
ENSG00000038532_9-7	16	10977225	10982991	ENSG00000038532	16:10977225-10977399	16:10982878-10982991	Non Conserved
ENSG00000039068_13-8	16	68808424	68813495	ENSG00000039068	16:68808424-68808567	16:68813313-68813495	Non Conserved
ENSG00000039068_14-13	16	68813313	68815759	ENSG00000039068	16:68813313-68813413	16:68815515-68815759	Non Conserved
ENSG00000039068_9-8	16	68808424	68808848	ENSG00000039068	16:68808424-68808567	16:68808693-68808848	Non Conserved
ENSG00000039123_14-9	5	55343331	55351029	ENSG00000039123	5:55343331-55343372	5:55350919-55351029	Non Conserved
ENSG00000039123_15-8	5	55341681	55353269	ENSG00000039123	5:55341681-55341771	5:55353168-55353269	Non Conserved
ENSG00000039123_15-9	5	55343331	55353269	ENSG00000039123	5:55343331-55343372	5:55353168-55353269	Non Conserved
ENSG00000039123_16-8	5	55341681	55358698	ENSG00000039123	5:55341681-55341771	5:55358573-55358698	Non Conserved
ENSG00000039123_16-9	5	55343331	55358698	ENSG00000039123	5:55343331-55343372	5:55358573-55358698	Non Conserved
ENSG00000039123_17-8	5	55341681	55366875	ENSG00000039123	5:55341681-55341771	5:55366725-55366875	Non Conserved
ENSG00000039123_17-9	5	55343331	55366875	ENSG00000039123	5:55343331-55343372	5:55366725-55366875	Non Conserved
ENSG00000039123_19-17	5	55366725	55379195	ENSG00000039123	5:55366725-55366875	5:55379127-55379195	Non Conserved
ENSG00000039123_20-9	5	55343331	55388102	ENSG00000039123	5:55343331-55343372	5:55387974-55388102	Non Conserved
ENSG00000039319_16-10	5	80434109	80445405	ENSG00000039319	5:80434109-80434217	5:80445261-80445405	Non Conserved
ENSG00000039319_16-11	5	80436756	80445405	ENSG00000039319	5:80436756-80437159	5:80445261-80445405	Non Conserved
ENSG00000039319_26-20	5	80450431	80456565	ENSG00000039319	5:80450431-80450470	5:80453989-80456565	Non Conserved
ENSG00000039319_28-19	5	80449591	80459494	ENSG00000039319	5:80449591-80449713	5:80459414-80459494	Non Conserved
ENSG00000039319_31-19	5	80449591	80474830	ENSG00000039319	5:80449591-80449713	5:80474663-80474830	Non Conserved
ENSG00000039319_31-20	5	80450431	80474830	ENSG00000039319	5:80450431-80450470	5:80474663-80474830	Non Conserved
ENSG00000039560_34-22	5	34807800	34826479	ENSG00000039560	5:34807800-34807820	5:34826004-34826479	Non Conserved
ENSG00000039560_35-27	5	34813574	34829797	ENSG00000039560	5:34813574-34813660	5:34829732-34829797	Non Conserved
ENSG00000040275_10-4	5	169588394	169594681	ENSG00000040275	5:169588394-169588490	5:169594571-169594681	Non Conserved
ENSG00000040275_13-10	5	169594571	169598579	ENSG00000040275	5:169594571-169594681	5:169598476-169598579	Non Conserved
ENSG00000040933_31-21	2	98552786	98568668	ENSG00000040933	2:98552786-98552969	2:98568571-98568668	Non Conserved
ENSG00000040933_31-26	2	98563465	98568668	ENSG00000040933	2:98563465-98563637	2:98568571-98568668	Non Conserved
ENSG00000041353_4-2	18	54877567	54884436	ENSG00000041353	18:54877567-54877738	18:54884333-54884436	Non Conserved
ENSG00000041515_15-14	13	108855443	108866242	ENSG00000041515	13:108855443-108855553	13:108866177-108866242	Non Conserved
ENSG00000041515_18-16	13	108883059	108898133	ENSG00000041515	13:108883059-108883186	13:108898016-108898133	Non Conserved
ENSG00000041515_23-12	13	108823125	108964902	ENSG00000041515	13:108823125-108823278	13:108964761-108964902	Non Conserved
ENSG00000041515_23-16	13	108883059	108964902	ENSG00000041515	13:108883059-108883186	13:108964761-108964902	Non Conserved
ENSG00000041515_24-16	13	108883059	108992448	ENSG00000041515	13:108883059-108883186	13:108992376-108992448	Non Conserved
ENSG00000041515_24-19	13	108910003	108992448	ENSG00000041515	13:108910003-108910150	13:108992376-108992448	Non Conserved
ENSG00000041515_24-5	13	108712661	108992448	ENSG00000041515	13:108712661-108712731	13:108992376-108992448	Non Conserved
ENSG00000041515_25-20	13	108957688	109009049	ENSG00000041515	13:108957688-108957799	13:109008897-109009049	Non Conserved
ENSG00000041515_26-16	13	108883059	109019911	ENSG00000041515	13:108883059-108883186	13:109019711-109019911	Non Conserved
ENSG00000041515_26-21	13	108961539	109019911	ENSG00000041515	13:108961539-108961656	13:109019711-109019911	Non Conserved
ENSG00000041515_27-12	13	108823125	109046991	ENSG00000041515	13:108823125-108823278	13:109046916-109046991	Non Conserved
ENSG00000041515_27-16	13	108883059	109046991	ENSG00000041515	13:108883059-108883186	13:109046916-109046991	Non Conserved
ENSG00000041515_32-27	13	109046916	109100887	ENSG00000041515	13:109046916-109046991	13:109100785-109100887	Non Conserved
ENSG00000041515_32-7	13	108785635	109100887	ENSG00000041515	13:108785635-108785740	13:109100785-109100887	Non Conserved
ENSG00000041515_34-20	13	108957688	109125358	ENSG00000041515	13:108957688-108957799	13:109125112-109125358	Non Conserved
ENSG00000041515_35-12	13	108823125	109127550	ENSG00000041515	13:108823125-108823278	13:109127282-109127550	Non Conserved
ENSG00000041515_35-20	13	108957688	109127550	ENSG00000041515	13:108957688-108957799	13:109127282-109127550	Non Conserved
ENSG00000041515_35-27	13	109046916	109127550	ENSG00000041515	13:109046916-109046991	13:109127282-109127550	Non Conserved
ENSG00000041515_35-32	13	109100785	109127550	ENSG00000041515	13:109100785-109100887	13:109127282-109127550	Non Conserved
ENSG00000041515_6-5	13	108712661	108727583	ENSG00000041515	13:108712661-108712731	13:108727440-108727583	Non Conserved
ENSG00000042088_25-13	14	89966147	89989765	ENSG00000042088	14:89966147-89966190	14:89989717-89989765	Non Conserved
ENSG00000042088_30-17	14	89980540	90033214	ENSG00000042088	14:89980540-89980587	14:90033106-90033214	Non Conserved
ENSG00000042317_14-10	14	88416711	88429463	ENSG00000042317	14:88416711-88416761	14:88427630-88429463	Non Conserved
ENSG00000042317_17-10	14	88416711	88433212	ENSG00000042317	14:88416711-88416761	14:88432623-88433212	Non Conserved
ENSG00000042980_7-4	8	24299974	24311437	ENSG00000042980	8:24299974-24300077	8:24311361-24311437	Non Conserved
ENSG00000042980_7-5	8	24309894	24311437	ENSG00000042980	8:24309894-24309970	8:24311361-24311437	Non Conserved
ENSG00000044459_15-8	9	17273733	17342444	ENSG00000044459	9:17273733-17273866	9:17342325-17342444	Non Conserved
ENSG00000044459_16-12	9	17330632	17366717	ENSG00000044459	9:17330632-17330808	9:17366617-17366717	Non Conserved
ENSG00000044459_16-14	9	17340827	17366717	ENSG00000044459	9:17340827-17340948	9:17366617-17366717	Non Conserved
ENSG00000044459_18-13	9	17332605	17395069	ENSG00000044459	9:17332605-17332730	9:17394534-17395069	Non Conserved
ENSG00000044459_18-16	9	17366617	17395069	ENSG00000044459	9:17366617-17366717	9:17394534-17395069	Non Conserved
ENSG00000044459_21-20	9	17415788	17416189	ENSG00000044459	9:17415788-17415881	9:17415966-17416189	Non Conserved
ENSG00000044459_21-8	9	17273733	17416189	ENSG00000044459	9:17273733-17273866	9:17415966-17416189	Non Conserved
ENSG00000044459_22-11	9	17309058	17457715	ENSG00000044459	9:17309058-17309252	9:17457524-17457715	Non Conserved
ENSG00000044459_26-11	9	17309058	17466891	ENSG00000044459	9:17309058-17309252	9:17466706-17466891	Non Conserved
ENSG00000044459_26-17	9	17388162	17466891	ENSG00000044459	9:17388162-17388253	9:17466706-17466891	Non Conserved
ENSG00000044459_28-11	9	17309058	17487066	ENSG00000044459	9:17309058-17309252	9:17486989-17487066	Non Conserved
ENSG00000044459_28-12	9	17330632	17487066	ENSG00000044459	9:17330632-17330808	9:17486989-17487066	Non Conserved
ENSG00000044459_28-16	9	17366617	17487066	ENSG00000044459	9:17366617-17366717	9:17486989-17487066	Non Conserved
ENSG00000044459_28-24	9	17464497	17487066	ENSG00000044459	9:17464497-17464623	9:17486989-17487066	Non Conserved
ENSG00000044459_28-27	9	17484295	17487066	ENSG00000044459	9:17484295-17484480	9:17486989-17487066	Non Conserved
ENSG00000044459_7-6	9	17235658	17236588	ENSG00000044459	9:17235658-17235792	9:17236409-17236588	Non Conserved
ENSG00000044524_19-17	3	89449225	89472522	ENSG00000044524	3:89449225-89449374	3:89472464-89472522	Non Conserved
ENSG00000046604_13-11	18	31530987	31536429	ENSG00000046604	18:31530987-31531252	18:31536202-31536429	Non Conserved
ENSG00000046889_11-6	8	68022036	68053246	ENSG00000046889	8:68022036-68022140	8:68053097-68053246	Non Conserved
ENSG00000046889_13-4	8	68017846	68060779	ENSG00000046889	8:68017846-68017917	8:68060679-68060779	Non Conserved
ENSG00000046889_13-5	8	68019549	68060779	ENSG00000046889	8:68019549-68019671	8:68060679-68060779	Non Conserved
ENSG00000046889_20-14	8	68069033	68083388	ENSG00000046889	8:68069033-68069136	8:68083240-68083388	Non Conserved
ENSG00000046889_20-6	8	68022036	68083388	ENSG00000046889	8:68022036-68022140	8:68083240-68083388	Non Conserved
ENSG00000046889_25-21	8	68087724	68099843	ENSG00000046889	8:68087724-68087809	8:68099682-68099843	Non Conserved
ENSG00000046889_25-24	8	68097017	68099843	ENSG00000046889	8:68097017-68097201	8:68099682-68099843	Non Conserved
ENSG00000046889_27-21	8	68087724	68108331	ENSG00000046889	8:68087724-68087809	8:68108109-68108331	Non Conserved
ENSG00000046889_28-21	8	68087724	68109623	ENSG00000046889	8:68087724-68087809	8:68109416-68109623	Non Conserved
ENSG00000046889_34-24	8	68097017	68121049	ENSG00000046889	8:68097017-68097201	8:68120921-68121049	Non Conserved
ENSG00000046889_34-30	8	68115753	68121049	ENSG00000046889	8:68115753-68115932	8:68120921-68121049	Non Conserved
ENSG00000046889_34-6	8	68022036	68121049	ENSG00000046889	8:68022036-68022140	8:68120921-68121049	Non Conserved
ENSG00000046889_35-24	8	68097017	68127419	ENSG00000046889	8:68097017-68097201	8:68127378-68127419	Non Conserved
ENSG00000046889_38-21	8	68087724	68146352	ENSG00000046889	8:68087724-68087809	8:68146209-68146352	Non Conserved
ENSG00000046889_39-24	8	68097017	68157436	ENSG00000046889	8:68097017-68097201	8:68157322-68157436	Non Conserved
ENSG00000046889_39-31	8	68118550	68157436	ENSG00000046889	8:68118550-68118644	8:68157322-68157436	Non Conserved
ENSG00000046889_41-21	8	68087724	68192525	ENSG00000046889	8:68087724-68087809	8:68192335-68192525	Non Conserved
ENSG00000046889_41-27	8	68108109	68192525	ENSG00000046889	8:68108109-68108331	8:68192335-68192525	Non Conserved
ENSG00000046889_41-30	8	68115753	68192525	ENSG00000046889	8:68115753-68115932	8:68192335-68192525	Non Conserved
ENSG00000046889_41-31	8	68118550	68192525	ENSG00000046889	8:68118550-68118644	8:68192335-68192525	Non Conserved
ENSG00000046889_41-36	8	68134059	68192525	ENSG00000046889	8:68134059-68134276	8:68192335-68192525	Non Conserved
ENSG00000046889_41-39	8	68157322	68192525	ENSG00000046889	8:68157322-68157436	8:68192335-68192525	Non Conserved
ENSG00000046889_41-40	8	68191722	68192525	ENSG00000046889	8:68191722-68191788	8:68192335-68192525	Non Conserved
ENSG00000046889_42-21	8	68087724	68217718	ENSG00000046889	8:68087724-68087809	8:68217616-68217718	Non Conserved
ENSG00000046889_42-31	8	68118550	68217718	ENSG00000046889	8:68118550-68118644	8:68217616-68217718	Non Conserved
ENSG00000046889_43-39	8	68157322	68224626	ENSG00000046889	8:68157322-68157436	8:68224559-68224626	Non Conserved
ENSG00000046889_6-4	8	68017846	68022140	ENSG00000046889	8:68017846-68017917	8:68022036-68022140	Non Conserved
ENSG00000046889_7-4	8	68017846	68027323	ENSG00000046889	8:68017846-68017917	8:68027222-68027323	Non Conserved
ENSG00000047056_10-4	10	1072116	1093496	ENSG00000047056	10:1072116-1072293	10:1093452-1093496	Non Conserved
ENSG00000047056_11-6	10	1080011	1096246	ENSG00000047056	10:1080011-1080106	10:1096170-1096246	Non Conserved
ENSG00000047056_14-13	10	1103602	1105267	ENSG00000047056	10:1103602-1103836	10:1105126-1105267	Non Conserved
ENSG00000047056_15-14	10	1105126	1124352	ENSG00000047056	10:1105126-1105267	10:1124218-1124352	Non Conserved
ENSG00000047056_16-13	10	1103602	1125024	ENSG00000047056	10:1103602-1103836	10:1124910-1125024	Non Conserved
ENSG00000047056_16-15	10	1124218	1125024	ENSG00000047056	10:1124218-1124352	10:1124910-1125024	Non Conserved
ENSG00000047056_5-4	10	1072116	1078003	ENSG00000047056	10:1072116-1072293	10:1077907-1078003	Non Conserved
ENSG00000047188_13-7	5	113534305	113549020	ENSG00000047188	5:113534305-113534407	5:113548955-113549020	Non Conserved
ENSG00000047188_17-16	5	113553767	113554022	ENSG00000047188	5:113553767-113553854	5:113553942-113554022	Non Conserved
ENSG00000047188_18-16	5	113553767	113556134	ENSG00000047188	5:113553767-113553854	5:113556052-113556134	Non Conserved
ENSG00000047188_20-16	5	113553767	113561185	ENSG00000047188	5:113553767-113553854	5:113561080-113561185	Non Conserved
ENSG00000047188_20-9	5	113539074	113561185	ENSG00000047188	5:113539074-113539181	5:113561080-113561185	Non Conserved
ENSG00000047188_21-15	5	113553590	113563492	ENSG00000047188	5:113553590-113553686	5:113563373-113563492	Non Conserved
ENSG00000047188_21-16	5	113553767	113563492	ENSG00000047188	5:113553767-113553854	5:113563373-113563492	Non Conserved
ENSG00000047188_22-21	5	113563373	113564131	ENSG00000047188	5:113563373-113563492	5:113563859-113564131	Non Conserved
ENSG00000047188_25-16	5	113553767	113567849	ENSG00000047188	5:113553767-113553854	5:113567654-113567849	Non Conserved
ENSG00000047188_25-20	5	113561080	113567849	ENSG00000047188	5:113561080-113561185	5:113567654-113567849	Non Conserved
ENSG00000047188_25-9	5	113539074	113567849	ENSG00000047188	5:113539074-113539181	5:113567654-113567849	Non Conserved
ENSG00000047188_26-5	5	113526586	113579695	ENSG00000047188	5:113526586-113526703	5:113579586-113579695	Non Conserved
ENSG00000047188_30-20	5	113561080	113584479	ENSG00000047188	5:113561080-113561185	5:113581266-113584479	Non Conserved
ENSG00000047188_33-23	5	113565893	113592178	ENSG00000047188	5:113565893-113566019	5:113591996-113592178	Non Conserved
ENSG00000047578_15-13	16	27701589	27708920	ENSG00000047578	16:27701589-27701695	16:27708705-27708920	Non Conserved
ENSG00000047578_16-13	16	27701589	27721695	ENSG00000047578	16:27701589-27701695	16:27721558-27721695	Non Conserved
ENSG00000047578_18-13	16	27701589	27740920	ENSG00000047578	16:27701589-27701695	16:27740041-27740920	Non Conserved
ENSG00000047578_22-18	16	27740041	27761590	ENSG00000047578	16:27740041-27740920	16:27761413-27761590	Non Conserved
ENSG00000047578_22-20	16	27751719	27761590	ENSG00000047578	16:27751719-27751924	16:27761413-27761590	Non Conserved
ENSG00000047578_22-21	16	27754173	27761590	ENSG00000047578	16:27754173-27754251	16:27761413-27761590	Non Conserved
ENSG00000047578_4-3	16	27618425	27628830	ENSG00000047578	16:27618425-27618501	16:27628588-27628830	Non Conserved
ENSG00000047578_7-3	16	27618425	27648735	ENSG00000047578	16:27618425-27618501	16:27648604-27648735	Non Conserved
ENSG00000047578_8-3	16	27618425	27654736	ENSG00000047578	16:27618425-27618501	16:27654608-27654736	Non Conserved
ENSG00000047578_8-4	16	27628661	27654736	ENSG00000047578	16:27628661-27628830	16:27654608-27654736	Non Conserved
ENSG00000047644_11-6	X	10078799	10110020	ENSG00000047644	X:10078799-10078875	X:10109778-10110020	Non Conserved
ENSG00000047644_12-4	X	10063445	10116507	ENSG00000047644	X:10063445-10063554	X:10116418-10116507	Non Conserved
ENSG00000047644_12-7	X	10079725	10116507	ENSG00000047644	X:10079725-10079804	X:10116418-10116507	Non Conserved
ENSG00000047644_12-8	X	10090771	10116507	ENSG00000047644	X:10090771-10090900	X:10116418-10116507	Non Conserved
[truncated: 11,266 more rows]
