# Supplementary material for: Evolutionary dynamics of circular RNAs in primates
Source: eLife. 2021 Sep 20;10:e69148. doi: 10.7554/eLife.69148 (PMC8516421; doi:10.7554/eLife.69148)
Supplement: Supplementary file 4. [file elife-69148-supp4.csv]

Primate_CircID	Primate_numExons	Primate_StartExon	Primate_EndExon	LO_StartExon	LO_EndExon	Human_CircID	Primate	SpeciesID
ENSPTRG00000000186_11-11	1	ENSPTRG00000000186_1:14172892-14173062	ENSPTRG00000000186_1:14172892-14173062	ENSG00000189337_1:15043989-15044159	ENSG00000189337_1:15043989-15044159	NA	Chimpanzee	9598
ENSPTRG00000000201_5-5	1	ENSPTRG00000000201_1:14684268-14684607	ENSPTRG00000000201_1:14684268-14684607	ENSG00000116138_1:15536475-15536814	ENSG00000116138_1:15536475-15536814	NA	Chimpanzee	9598
ENSPTRG00000000378_6-6	1	ENSPTRG00000000378_1:25345006-25345700	ENSPTRG00000000378_1:25345006-25345700	ENSG00000130695_1:26255171-26255865	ENSG00000130695_1:26255171-26255865	NA	Chimpanzee	9598
ENSPTRG00000000438_6-2	5	ENSPTRG00000000438_1:27870180-27870292	ENSPTRG00000000438_1:27882156-27882287	ENSG00000162419_1:28690074-28690186	ENSG00000162419_1:28702438-28702569	NA	Chimpanzee	9598
ENSPTRG00000000527_25-7	19	ENSPTRG00000000527_1:35139768-35139888	ENSPTRG00000000527_1:35167810-35168009	ENSG00000134698_1:35822862-35822982	ENSG00000134698_1:35850854-35851053	NA	Chimpanzee	9598
ENSPTRG00000000529_37-34	5	ENSPTRG00000000529_1:35352436-35352595	ENSPTRG00000000529_1:35358801-35358935	ENSG00000126070_1:36034174-36034333	ENSG00000126070_1:36040307-36040441	NA	Chimpanzee	9598
ENSPTRG00000000771_12-9	4	ENSPTRG00000000771_1:54339210-54339308	ENSPTRG00000000771_1:54344529-54344648	ENSG00000162390_1:54593941-54594039	ENSG00000162390_1:54599296-54599415	NA	Chimpanzee	9598
ENSPTRG00000000806_28-22	8	ENSPTRG00000000806_1:61716803-61717012	ENSPTRG00000000806_1:61762294-61762471	ENSG00000132849_1:61856030-61856239	ENSG00000132849_1:61901282-61901459	NA	Chimpanzee	9598
ENSPTRG00000000823_16-6	11	ENSPTRG00000000823_1:64552031-64552157	ENSPTRG00000000823_1:64587114-64587295	ENSG00000158966_1:64629355-64629481	ENSG00000158966_1:64664200-64664679	NA	Chimpanzee	9598
ENSPTRG00000000823_5-5	1	ENSPTRG00000000823_1:64525293-64525399	ENSPTRG00000000823_1:64525293-64525399	ENSG00000158966_1:64602806-64602912	ENSG00000158966_1:64602806-64602912	NA	Chimpanzee	9598
ENSPTRG00000000884_17-11	7	ENSPTRG00000000884_1:77973045-77973163	ENSPTRG00000000884_1:77984874-77984990	ENSG00000180488_1:77858938-77859056	ENSG00000180488_1:77873001-77873120	NA	Chimpanzee	9598
ENSPTRG00000001007_19-15	7	ENSPTRG00000001007_1:101121295-101121454	ENSPTRG00000001007_1:101135935-101136268	ENSG00000079335_1:100484292-100484451	ENSG00000079335_1:100498929-100499262	NA	Chimpanzee	9598
ENSPTRG00000001128_3-3	1	ENSPTRG00000001128_1:121982035-121982217	ENSPTRG00000001128_1:121982035-121982217	ENSG00000118655_1:113908009-113908191	ENSG00000118655_1:113908009-113908191	NA	Chimpanzee	9598
ENSPTRG00000001255_11-10	2	ENSPTRG00000001255_1:128389526-128389783	ENSPTRG00000001255_1:128394020-128394220	ENSG00000163125_1:150460060-150460317	ENSG00000163125_1:150464527-150464727	NA	Chimpanzee	9598
ENSPTRG00000001255_8-8	1	ENSPTRG00000001255_1:128375732-128375907	ENSPTRG00000001255_1:128375732-128375907	ENSG00000163125_1:150446226-150446401	ENSG00000163125_1:150446226-150446401	NA	Chimpanzee	9598
ENSPTRG00000001596_15-9	7	ENSPTRG00000001596_1:139907242-139907333	ENSPTRG00000001596_1:140000415-140000499	ENSG00000118217_1:161821070-161821161	ENSG00000118217_1:161912296-161912380	NA	Chimpanzee	9598
ENSPTRG00000001596_6-5	2	ENSPTRG00000001596_1:139877946-139878075	ENSPTRG00000001596_1:139878671-139878874	ENSG00000118217_1:161791408-161791537	ENSG00000118217_1:161792124-161792327	NA	Chimpanzee	9598
ENSPTRG00000001596_7-5	3	ENSPTRG00000001596_1:139877946-139878075	ENSPTRG00000001596_1:139888584-139888804	ENSG00000118217_1:161791408-161791537	ENSG00000118217_1:161802052-161802272	NA	Chimpanzee	9598
ENSPTRG00000001689_28-5	22	ENSPTRG00000001689_1:150920106-150920220	ENSPTRG00000001689_1:150970038-150970129	ENSG00000094975_1:172551512-172551626	ENSG00000094975_1:172602696-172602787	NA	Chimpanzee	9598
ENSPTRG00000001712_2-2	1	ENSPTRG00000001712_1:155065062-155066898	ENSPTRG00000001712_1:155065062-155066898	ENSG00000116183_1:176555407-176557241	ENSG00000116183_1:176555407-176557241	NA	Chimpanzee	9598
ENSPTRG00000001728_11-6	6	ENSPTRG00000001728_1:157831397-157831548	ENSPTRG00000001728_1:157838682-157838763	ENSG00000057252_1:179335506-179335657	ENSG00000057252_1:179342862-179342943	NA	Chimpanzee	9598
ENSPTRG00000001728_18-6	13	ENSPTRG00000001728_1:157831397-157831548	ENSPTRG00000001728_1:157847082-157847227	ENSG00000057252_1:179335506-179335657	ENSG00000057252_1:179351317-179351462	NA	Chimpanzee	9598
ENSPTRG00000001732_18-15	4	ENSPTRG00000001732_1:158174508-158174666	ENSPTRG00000001732_1:158185798-158185941	ENSG00000162782_1:179652039-179652197	ENSG00000162782_1:179663348-179663491	NA	Chimpanzee	9598
ENSPTRG00000001738_14-12	3	ENSPTRG00000001738_1:158537116-158538176	ENSPTRG00000001738_1:158541582-158541745	ENSG00000135837_1:180019949-180021009	ENSG00000135837_1:180024419-180024582	NA	Chimpanzee	9598
ENSPTRG00000001777_10-2	8	ENSPTRG00000001777_1:163802585-163802677	ENSPTRG00000001777_1:163832300-163832393	ENSG00000116668_1:185160833-185160925	ENSG00000116668_1:185190549-185190642	NA	Chimpanzee	9598
ENSPTRG00000001777_10-8	3	ENSPTRG00000001777_1:163825996-163826097	ENSPTRG00000001777_1:163832300-163832393	ENSG00000116668_1:185184243-185184344	ENSG00000116668_1:185190549-185190642	NA	Chimpanzee	9598
ENSPTRG00000001777_16-2	14	ENSPTRG00000001777_1:163802585-163802677	ENSPTRG00000001777_1:163873673-163873804	ENSG00000116668_1:185160833-185160925	ENSG00000116668_1:185231577-185231708	NA	Chimpanzee	9598
ENSPTRG00000001777_18-7	12	ENSPTRG00000001777_1:163823691-163823802	ENSPTRG00000001777_1:163919098-163919162	ENSG00000116668_1:185181946-185182057	ENSG00000116668_1:185276604-185276668	NA	Chimpanzee	9598
ENSPTRG00000001777_9-6	4	ENSPTRG00000001777_1:163822133-163822192	ENSPTRG00000001777_1:163826497-163826685	ENSG00000116668_1:185180391-185180450	ENSG00000116668_1:185184743-185184931	NA	Chimpanzee	9598
ENSPTRG00000001843_13-12	2	ENSPTRG00000001843_1:180859566-180859678	ENSPTRG00000001843_1:180859849-180859957	ENSG00000176393_1:202001469-202001767	ENSG00000176393_1:202001469-202001767	NA	Chimpanzee	9598
ENSPTRG00000001851_26-6	19	ENSPTRG00000001851_1:181292461-181292574	ENSPTRG00000001851_1:181366655-181366696	ENSG00000077157_1:202422620-202422738	ENSG00000077157_1:202496781-202496822	NA	Chimpanzee	9598
ENSPTRG00000002144_10-5	6	ENSPTRG00000002144_1:215829309-215829423	ENSPTRG00000002144_1:215843012-215843093	ENSG00000077522_1:236717858-236717972	ENSG00000077522_1:236731233-236731314	NA	Chimpanzee	9598
ENSPTRG00000002149_10-4	6	ENSPTRG00000002149_1:216383317-216383436	ENSPTRG00000002149_1:216492394-216492506	ENSG00000198626_1:237270497-237270616	ENSG00000198626_1:237377323-237377435	NA	Chimpanzee	9598
ENSPTRG00000002149_12-9	4	ENSPTRG00000002149_1:216489785-216489863	ENSPTRG00000002149_1:216503128-216503224	ENSG00000198626_1:237374717-237374795	ENSG00000198626_1:237388087-237388183	NA	Chimpanzee	9598
ENSPTRG00000002149_31-27	5	ENSPTRG00000002149_1:216647618-216647701	ENSPTRG00000002149_1:216687455-216687629	ENSG00000198626_1:237530427-237530510	ENSG00000198626_1:237569145-237569319	NA	Chimpanzee	9598
ENSPTRG00000002258_18-2	12	ENSPTRG00000002258_10:5897194-5897327	ENSPTRG00000002258_10:5922864-5923106	ENSG00000108021_10:5709530-5709663	ENSG00000108021_10:5735304-5735546	NA	Chimpanzee	9598
ENSPTRG00000002311_16-4	9	ENSPTRG00000002311_10:15265295-15265375	ENSPTRG00000002311_10:15281193-15281295	ENSG00000284024_10:14839905-14839985	ENSG00000187522_10:14855841-14855943	NA	Chimpanzee	9598
ENSPTRG00000002342_12-8	5	ENSPTRG00000002342_10:20926952-20927051	ENSPTRG00000002342_10:20981347-20981385	ENSG00000120594_10:20164468-20164567	ENSG00000120594_10:20219064-20219102	NA	Chimpanzee	9598
ENSPTRG00000002346_12-7	5	ENSPTRG00000002346_10:22386941-22386995	ENSPTRG00000002346_10:22421352-22421447	ENSG00000078403_10:21586294-21586348	ENSG00000078403_10:21617112-21617207	NA	Chimpanzee	9598
ENSPTRG00000002362_15-12	4	ENSPTRG00000002362_10:25390250-25390380	ENSPTRG00000002362_10:25398027-25398210	ENSG00000120549_10:24520123-24520253	ENSG00000120549_10:24527936-24528119	NA	Chimpanzee	9598
ENSPTRG00000002362_19-14	6	ENSPTRG00000002362_10:25394432-25394873	ENSPTRG00000002362_10:25406900-25407019	ENSG00000120549_10:24524323-24524764	ENSG00000120549_10:24536774-24536893	NA	Chimpanzee	9598
ENSPTRG00000002362_22-15	8	ENSPTRG00000002362_10:25398027-25398210	ENSPTRG00000002362_10:25415178-25415300	ENSG00000120549_10:24527936-24528119	ENSG00000120549_10:24544981-24545103	NA	Chimpanzee	9598
ENSPTRG00000002362_4-4	1	ENSPTRG00000002362_10:25247821-25248019	ENSPTRG00000002362_10:25247821-25248019	ENSG00000120549_10:24380869-24381067	ENSG00000120549_10:24380869-24381067	NA	Chimpanzee	9598
ENSPTRG00000002379_9-9	1	ENSPTRG00000002379_10:28033783-28034922	ENSPTRG00000002379_10:28033783-28034922	ENSG00000120539_10:27169944-27171083	ENSG00000120539_10:27169944-27171083	NA	Chimpanzee	9598
ENSPTRG00000002509_10-4	6	ENSPTRG00000002509_10:52272674-52272787	ENSPTRG00000002509_10:52871916-52872010	ENSG00000185532_10:51467723-51467836	ENSG00000185532_10:52062537-52062631	NA	Chimpanzee	9598
ENSPTRG00000002558_12-5	6	ENSPTRG00000002558_10:69640595-69642902	ENSPTRG00000002558_10:69678694-69678831	ENSG00000138336_10:68644698-68647005	ENSG00000138336_10:68682836-68682973	NA	Chimpanzee	9598
ENSPTRG00000002558_5-5	1	ENSPTRG00000002558_10:69640595-69642902	ENSPTRG00000002558_10:69640595-69642902	ENSG00000138336_10:68644698-68647005	ENSG00000138336_10:68644698-68647005	NA	Chimpanzee	9598
ENSPTRG00000002562_15-10	6	ENSPTRG00000002562_10:69978882-69978999	ENSPTRG00000002562_10:69999646-69999765	ENSG00000107625_10:68913162-68913279	ENSG00000107625_10:68934799-68934918	NA	Chimpanzee	9598
ENSPTRG00000002562_16-10	7	ENSPTRG00000002562_10:69978882-69978999	ENSPTRG00000002562_10:70000850-70000923	ENSG00000107625_10:68913162-68913279	ENSG00000107625_10:68936006-68936079	NA	Chimpanzee	9598
ENSPTRG00000002562_18-17	2	ENSPTRG00000002562_10:70001788-70001947	ENSPTRG00000002562_10:70005915-70006049	ENSG00000107625_10:68936936-68937095	ENSG00000107625_10:68941060-68941194	NA	Chimpanzee	9598
ENSPTRG00000002652_11-6	6	ENSPTRG00000002652_10:76192895-76193826	ENSPTRG00000002652_10:76205190-76205283	ENSG00000156650_10:74975399-74975454	ENSG00000156650_10:74985329-74989112	NA	Chimpanzee	9598
ENSPTRG00000002656_2-2	1	ENSPTRG00000002656_10:76371744-76372336	ENSPTRG00000002656_10:76371744-76372336	ENSG00000156671_10:75150514-75151106	ENSG00000156671_10:75150514-75151106	NA	Chimpanzee	9598
ENSPTRG00000002706_3-3	1	ENSPTRG00000002706_10:88202631-88202849	ENSPTRG00000002706_10:88202631-88202849	ENSG00000107779_10:86875867-86876085	ENSG00000107779_10:86875867-86876085	NA	Chimpanzee	9598
ENSPTRG00000002706_5-3	3	ENSPTRG00000002706_10:88202631-88202849	ENSPTRG00000002706_10:88218894-88218996	ENSG00000107779_10:86875867-86876085	ENSG00000107779_10:86892127-86892229	NA	Chimpanzee	9598
ENSPTRG00000002706_7-4	4	ENSPTRG00000002706_10:88216814-88216976	ENSPTRG00000002706_10:88226795-88226894	ENSG00000107779_10:86890062-86890224	ENSG00000107779_10:86900027-86900126	NA	Chimpanzee	9598
ENSPTRG00000002747_24-3	21	ENSPTRG00000002747_10:92738745-92738874	ENSPTRG00000002747_10:92851324-92851467	ENSG00000165338_10:91425281-91425410	ENSG00000165338_10:91501191-91501334	NA	Chimpanzee	9598
ENSPTRG00000002758_10-2	9	ENSPTRG00000002758_10:93969242-93969374	ENSPTRG00000002758_10:93984325-93984413	ENSG00000138160_10:92606265-92606397	ENSG00000138160_10:92621385-92621473	NA	Chimpanzee	9598
ENSPTRG00000002761_20-16	5	ENSPTRG00000002761_10:94328225-94328330	ENSPTRG00000002761_10:94353974-94354153	ENSG00000138190_10:92948274-92948379	ENSG00000138190_10:92974053-92974232	NA	Chimpanzee	9598
ENSPTRG00000002855_17-5	10	ENSPTRG00000002855_10:102350478-102350535	ENSPTRG00000002855_10:102384820-102384917	ENSG00000119906_10:100918384-100918441	ENSG00000119906_10:100947039-100947136	NA	Chimpanzee	9598
ENSPTRG00000002869_26-20	7	ENSPTRG00000002869_10:102981282-102981419	ENSPTRG00000002869_10:102987266-102987344	ENSG00000166167_10:101532295-101532432	ENSG00000166167_10:101538293-101538371	NA	Chimpanzee	9598
ENSPTRG00000002908_6-3	2	ENSPTRG00000002908_10:104832378-104832433	ENSPTRG00000002908_10:104833700-104833796	ENSG00000156374_10:103347395-103347450	ENSG00000156374_10:103348355-103348812	NA	Chimpanzee	9598
ENSPTRG00000002949_7-7	2	ENSPTRG00000002949_10:114676168-114676269	ENSPTRG00000002949_10:114676081-114676269	ENSG00000148737_10:113040025-113040126	ENSG00000148737_10:113040025-113040126	NA	Chimpanzee	9598
ENSPTRG00000003004_14-5	9	ENSPTRG00000003004_10:122707351-122707504	ENSPTRG00000003004_10:122719575-122719751	ENSG00000120008_10:120858643-120858796	ENSG00000120008_10:120871170-120871346	NA	Chimpanzee	9598
ENSPTRG00000003020_11-7	5	ENSPTRG00000003020_10:124880692-124880898	ENSPTRG00000003020_10:124887410-124887499	ENSG00000196177_10:123040466-123040672	ENSG00000196177_10:123047209-123047298	NA	Chimpanzee	9598
ENSPTRG00000003048_19-10	10	ENSPTRG00000003048_10:128955248-128955383	ENSPTRG00000003048_10:128984458-128984582	ENSG00000150760_10:126996748-126996883	ENSG00000150760_10:127023200-127023324	NA	Chimpanzee	9598
ENSPTRG00000003048_23-10	14	ENSPTRG00000003048_10:128955248-128955383	ENSPTRG00000003048_10:128993458-128993641	ENSG00000150760_10:126996748-126996883	ENSG00000150760_10:127032137-127032320	NA	Chimpanzee	9598
ENSPTRG00000003204_14-10	3	ENSPTRG00000003204_11:3984380-3984557	ENSPTRG00000003204_11:3997639-3997874	ENSG00000167323_11:4070026-4070064	ENSG00000167323_11:4083157-4083498	NA	Chimpanzee	9598
ENSPTRG00000003386_11-3	9	ENSPTRG00000003386_11:14650614-14650862	ENSPTRG00000003386_11:14693623-14693736	ENSG00000152270_11:14786437-14786532	ENSG00000152270_11:14834982-14835095	NA	Chimpanzee	9598
ENSPTRG00000003420_11-5	7	ENSPTRG00000003420_11:18162676-18162868	ENSPTRG00000003420_11:18174964-18175051	ENSG00000110768_11:18335754-18335946	ENSG00000110768_11:18347832-18347919	NA	Chimpanzee	9598
ENSPTRG00000003436_15-11	5	ENSPTRG00000003436_11:19735380-19735540	ENSPTRG00000003436_11:19791013-19791402	ENSG00000166833_11:19892434-19892594	ENSG00000166833_11:19948691-19949080	NA	Chimpanzee	9598
ENSPTRG00000003436_52-28	20	ENSPTRG00000003436_11:19896292-19896452	ENSPTRG00000003436_11:19945832-19945903	ENSG00000166833_11:20054080-20054240	ENSG00000166833_11:20103653-20103724	NA	Chimpanzee	9598
ENSPTRG00000003439_14-8	7	ENSPTRG00000003439_11:20259568-20259712	ENSPTRG00000003439_11:20339882-20339968	ENSG00000185238_11:20397577-20397662	ENSG00000185238_11:20464460-20464546	NA	Chimpanzee	9598
ENSPTRG00000003983_20-12	9	ENSPTRG00000003983_11:68259397-68259613	ENSPTRG00000003983_11:68288396-68288605	ENSG00000162337_11:68403483-68403699	ENSG00000162337_11:68425978-68426187	NA	Chimpanzee	9598
ENSPTRG00000003983_24-24	1	ENSPTRG00000003983_11:68301333-68301569	ENSPTRG00000003983_11:68301333-68301569	ENSG00000162337_11:68438446-68438682	ENSG00000162337_11:68438446-68438682	NA	Chimpanzee	9598
ENSPTRG00000003984_15-6	9	ENSPTRG00000003984_11:68415874-68415986	ENSPTRG00000003984_11:68445018-68445104	ENSG00000110075_11:68554145-68554257	ENSG00000110075_11:68583043-68583129	NA	Chimpanzee	9598
ENSPTRG00000004093_13-8	6	ENSPTRG00000004093_11:76485379-76485554	ENSPTRG00000004093_11:76523030-76523284	ENSG00000158636_11:76458183-76461015	ENSG00000158636_11:76496215-76496469	NA	Chimpanzee	9598
ENSPTRG00000004128_16-5	10	ENSPTRG00000004128_11:83335999-83336106	ENSPTRG00000004128_11:83375267-83375393	ENSG00000137494_11:83206058-83206165	ENSG00000137494_11:83245498-83245624	NA	Chimpanzee	9598
ENSPTRG00000004175_30-18	13	ENSPTRG00000004175_11:93786585-93786762	ENSPTRG00000004175_11:93814019-93814118	ENSG00000166004_11:93702460-93702637	ENSG00000166004_11:93729870-93729969	NA	Chimpanzee	9598
ENSPTRG00000004224_70-58	10	ENSPTRG00000004224_11:103467515-103467628	ENSPTRG00000004224_11:103501299-103501462	ENSG00000187240_11:103219915-103220028	ENSG00000187240_11:103253285-103253448	NA	Chimpanzee	9598
ENSPTRG00000004224_90-71	19	ENSPTRG00000004224_11:103503435-103503554	ENSPTRG00000004224_11:103652106-103652315	ENSG00000187240_11:103255415-103255534	ENSG00000187240_11:103399663-103399872	NA	Chimpanzee	9598
ENSPTRG00000004224_91-75	16	ENSPTRG00000004224_11:103528423-103528488	ENSPTRG00000004224_11:103687403-103687492	ENSG00000187240_11:103280348-103280413	ENSG00000187240_11:103435943-103436032	NA	Chimpanzee	9598
ENSPTRG00000004224_93-82	12	ENSPTRG00000004224_11:103551169-103551329	ENSPTRG00000004224_11:103707727-103707808	ENSG00000187240_11:103303093-103303253	ENSG00000187240_11:103456275-103456356	NA	Chimpanzee	9598
ENSPTRG00000004224_94-67	25	ENSPTRG00000004224_11:103491333-103491431	ENSPTRG00000004224_11:103719404-103719520	ENSG00000187240_11:103243693-103243791	ENSG00000187240_11:103468389-103468705	NA	Chimpanzee	9598
ENSPTRG00000004224_94-75	19	ENSPTRG00000004224_11:103528423-103528488	ENSPTRG00000004224_11:103719404-103719520	ENSG00000187240_11:103280348-103280413	ENSG00000187240_11:103468389-103468705	NA	Chimpanzee	9598
ENSPTRG00000004224_94-82	13	ENSPTRG00000004224_11:103551169-103551329	ENSPTRG00000004224_11:103719404-103719520	ENSG00000187240_11:103303093-103303253	ENSG00000187240_11:103468389-103468705	NA	Chimpanzee	9598
ENSPTRG00000004248_15-9	5	ENSPTRG00000004248_11:108470477-108470592	ENSPTRG00000004248_11:108485779-108485866	ENSG00000149308_11:108169928-108170043	ENSG00000149308_11:108185232-108185319	NA	Chimpanzee	9598
ENSPTRG00000004250_29-19	9	ENSPTRG00000004250_11:108582797-108582879	ENSPTRG00000004250_11:108601342-108601541	ENSG00000149311_11:108271064-108271146	ENSG00000149311_11:108289602-108289801	NA	Chimpanzee	9598
ENSPTRG00000004250_29-21	8	ENSPTRG00000004250_11:108584261-108584336	ENSPTRG00000004250_11:108601342-108601541	ENSG00000149311_11:108272532-108272607	ENSG00000149311_11:108289602-108289801	NA	Chimpanzee	9598
ENSPTRG00000004250_56-35	22	ENSPTRG00000004250_11:108613392-108613533	ENSPTRG00000004250_11:108647552-108647668	ENSG00000149311_11:108301648-108301789	ENSG00000149311_11:108335845-108335961	NA	Chimpanzee	9598
ENSPTRG00000004256_10-2	9	ENSPTRG00000004256_11:108985035-108985095	ENSPTRG00000004256_11:109017104-109017202	ENSG00000178105_11:108673467-108673527	ENSG00000178105_11:108706739-108706837	NA	Chimpanzee	9598
ENSPTRG00000004302_2-2	1	ENSPTRG00000004302_11:114466682-114468039	ENSPTRG00000004302_11:114466682-114468039	ENSG00000109906_11:114063211-114064568	ENSG00000109906_11:114063211-114064568	NA	Chimpanzee	9598
ENSPTRG00000004323_6-4	3	ENSPTRG00000004323_11:117659778-117659823	ENSPTRG00000004323_11:117660978-117661037	ENSG00000167257_11:117238601-117238646	ENSG00000167257_11:117238601-117239860	NA	Chimpanzee	9598
ENSPTRG00000004393_10-5	7	ENSPTRG00000004393_11:120874362-120874385	ENSPTRG00000004393_11:120890066-120890115	ENSG00000196914_11:120406118-120406141	ENSG00000196914_11:120421803-120421852	NA	Chimpanzee	9598
ENSPTRG00000004402_4-4	1	ENSPTRG00000004402_11:123401842-123402361	ENSPTRG00000004402_11:123401842-123402361	ENSG00000109944_11:122903925-122904444	ENSG00000109944_11:122903925-122904444	NA	Chimpanzee	9598
ENSPTRG00000004515_12-7	5	ENSPTRG00000004515_12:1194403-1194570	ENSPTRG00000004515_12:1269616-1269627	ENSG00000082805_12:1141620-1141787	ENSG00000082805_12:1204501-1204512	NA	Chimpanzee	9598
ENSPTRG00000004515_15-15	1	ENSPTRG00000004515_12:1398615-1398775	ENSPTRG00000004515_12:1398615-1398775	ENSG00000082805_12:1289852-1290012	ENSG00000082805_12:1289852-1290012	NA	Chimpanzee	9598
ENSPTRG00000004699_6-6	1	ENSPTRG00000004699_12:12431657-12432202	ENSPTRG00000004699_12:12431657-12432202	ENSG00000139083_12:11869424-11869969	ENSG00000139083_12:11869424-11869969	NA	Chimpanzee	9598
ENSPTRG00000004815_8-8	1	ENSPTRG00000004815_12:58426469-58427563	ENSPTRG00000004815_12:58426469-58427563	ENSG00000151746_12:32327461-32328555	ENSG00000151746_12:32327461-32328555	NA	Chimpanzee	9598
ENSPTRG00000005247_7-5	3	ENSPTRG00000005247_12:80324391-80324463	ENSPTRG00000005247_12:80353008-80353076	ENSG00000067798_12:77966229-77966301	ENSG00000067798_12:77994803-77994871	NA	Chimpanzee	9598
ENSPTRG00000005268_13-11	3	ENSPTRG00000005268_12:85460958-85461079	ENSPTRG00000005268_12:85525914-85526028	ENSG00000179104_12:82985925-82986046	ENSG00000179104_12:83050904-83051018	NA	Chimpanzee	9598
ENSPTRG00000005268_14-8	7	ENSPTRG00000005268_12:85440211-85440296	ENSPTRG00000005268_12:85536765-85536828	ENSG00000179104_12:82965024-82965109	ENSG00000179104_12:83061768-83061831	NA	Chimpanzee	9598
ENSPTRG00000005268_5-5	2	ENSPTRG00000005268_12:85334190-85334760	ENSPTRG00000005268_12:85334188-85334760	ENSG00000179104_12:82857010-82857580	ENSG00000179104_12:82857010-82857580	NA	Chimpanzee	9598
ENSPTRG00000005268_6-6	1	ENSPTRG00000005268_12:85372503-85373331	ENSPTRG00000005268_12:85372503-85373331	ENSG00000179104_12:82895818-82896646	ENSG00000179104_12:82895818-82896646	NA	Chimpanzee	9598
ENSPTRG00000005278_29-17	11	ENSPTRG00000005278_12:90719659-90719761	ENSPTRG00000005278_12:90730853-90730940	ENSG00000198707_12:88106996-88107098	ENSG00000198707_12:88118483-88118570	NA	Chimpanzee	9598
ENSPTRG00000005335_18-5	14	ENSPTRG00000005335_12:101430448-101430645	ENSPTRG00000005335_12:101479617-101479778	ENSG00000120868_12:98649487-98649684	ENSG00000120868_12:98699408-98699569	NA	Chimpanzee	9598
ENSPTRG00000005335_23-6	18	ENSPTRG00000005335_12:101439381-101439564	ENSPTRG00000005335_12:101495613-101495738	ENSG00000120868_12:98659160-98659343	ENSG00000120868_12:98715427-98715552	NA	Chimpanzee	9598
ENSPTRG00000005390_13-8	6	ENSPTRG00000005390_12:109333538-109333629	ENSPTRG00000005390_12:109368034-109368168	ENSG00000013503_12:106376359-106376450	ENSG00000013503_12:106410826-106410960	NA	Chimpanzee	9598
ENSPTRG00000005436_14-10	4	ENSPTRG00000005436_12:113208417-113208563	ENSPTRG00000005436_12:113237589-113237678	ENSG00000122970_12:110162919-110163065	ENSG00000122970_12:110192617-110192706	NA	Chimpanzee	9598
ENSPTRG00000005436_8-4	5	ENSPTRG00000005436_12:113178061-113178150	ENSPTRG00000005436_12:113188852-113189015	ENSG00000122970_12:110132547-110132636	ENSG00000122970_12:110143382-110143545	NA	Chimpanzee	9598
ENSPTRG00000005629_12-7	6	ENSPTRG00000005629_12:132513332-132513383	ENSPTRG00000005629_12:132552957-132553006	ENSG00000151948_12:128899236-128899293	ENSG00000151948_12:128927105-128927154	NA	Chimpanzee	9598
ENSPTRG00000005685_23-13	10	ENSPTRG00000005685_13:5162305-5162395	ENSPTRG00000005685_13:5197209-5197295	ENSG00000032742_13:20596150-20596240	ENSG00000032742_13:20631016-20631102	NA	Chimpanzee	9598
ENSPTRG00000005685_26-13	13	ENSPTRG00000005685_13:5162305-5162395	ENSPTRG00000005685_13:5209676-5209826	ENSG00000032742_13:20596150-20596240	ENSG00000032742_13:20643455-20643605	NA	Chimpanzee	9598
ENSPTRG00000005685_27-22	6	ENSPTRG00000005685_13:5191967-5192066	ENSPTRG00000005685_13:5211064-5211179	ENSG00000032742_13:20625750-20625849	ENSG00000032742_13:20644843-20644958	NA	Chimpanzee	9598
ENSPTRG00000005685_29-13	16	ENSPTRG00000005685_13:5162305-5162395	ENSPTRG00000005685_13:5222585-5222650	ENSG00000032742_13:20596150-20596240	ENSG00000032742_13:20656365-20656430	NA	Chimpanzee	9598
ENSPTRG00000005685_29-7	22	ENSPTRG00000005685_13:5149042-5149104	ENSPTRG00000005685_13:5222585-5222650	ENSG00000032742_13:20582957-20583016	ENSG00000032742_13:20656365-20656430	NA	Chimpanzee	9598
ENSPTRG00000005685_30-22	9	ENSPTRG00000005685_13:5191967-5192066	ENSPTRG00000005685_13:5229726-5229832	ENSG00000032742_13:20625750-20625849	ENSG00000032742_13:20663265-20663604	NA	Chimpanzee	9598
ENSPTRG00000005685_31-7	24	ENSPTRG00000005685_13:5149042-5149104	ENSPTRG00000005685_13:5237185-5237251	ENSG00000032742_13:20582957-20583016	ENSG00000032742_13:20670973-20671039	NA	Chimpanzee	9598
ENSPTRG00000005713_24-6	13	ENSPTRG00000005713_13:9423304-9423384	ENSPTRG00000005713_13:9473559-9473679	ENSG00000132972_13:24779667-24779747	ENSG00000132972_13:24831858-24831978	NA	Chimpanzee	9598
ENSPTRG00000005713_24-7	12	ENSPTRG00000005713_13:9425482-9425582	ENSPTRG00000005713_13:9473559-9473679	ENSG00000132972_13:24781844-24781944	ENSG00000132972_13:24831858-24831978	NA	Chimpanzee	9598
ENSPTRG00000005719_12-5	8	ENSPTRG00000005719_13:9974919-9975061	ENSPTRG00000005719_13:9988096-9988270	ENSG00000139496_13:25307806-25307948	ENSG00000139496_13:25320919-25321093	NA	Chimpanzee	9598
ENSPTRG00000005742_12-4	6	ENSPTRG00000005742_13:12888317-12888383	ENSPTRG00000005742_13:12973359-12973416	ENSG00000152520_13:28176493-28176559	ENSG00000152520_13:28261401-28261458	NA	Chimpanzee	9598
ENSPTRG00000005742_7-7	1	ENSPTRG00000005742_13:12932230-12932377	ENSPTRG00000005742_13:12932230-12932377	ENSG00000152520_13:28220231-28220378	ENSG00000152520_13:28220231-28220378	NA	Chimpanzee	9598
ENSPTRG00000005759_5-2	4	ENSPTRG00000005759_13:15687936-15688020	ENSPTRG00000005759_13:15714713-15714889	ENSG00000175664_13:30939694-30939778	ENSG00000175664_13:30966222-30966398	NA	Chimpanzee	9598
ENSPTRG00000005761_14-7	8	ENSPTRG00000005761_13:15997754-15997830	ENSPTRG00000005761_13:16037544-16037643	ENSG00000187676_13:31247023-31247099	ENSG00000187676_13:31286720-31286819	NA	Chimpanzee	9598
ENSPTRG00000005761_6-4	2	ENSPTRG00000005761_13:15973697-15973736	ENSPTRG00000005761_13:15979932-15980041	ENSG00000187676_13:31222952-31222991	ENSG00000187676_13:31229185-31229294	NA	Chimpanzee	9598
ENSPTRG00000005771_10-9	2	ENSPTRG00000005771_13:17422413-17422528	ENSPTRG00000005771_13:17425393-17425487	ENSG00000083642_13:32675844-32675959	ENSG00000083642_13:32678835-32678929	NA	Chimpanzee	9598
ENSPTRG00000005823_11-4	5	ENSPTRG00000005823_13:26977703-26977813	ENSPTRG00000005823_13:27012956-27013081	ENSG00000102780_13:42127463-42127573	ENSG00000102780_13:42160011-42160136	NA	Chimpanzee	9598
ENSPTRG00000005847_22-17	5	ENSPTRG00000005847_13:30420515-30420620	ENSPTRG00000005847_13:30435868-30436002	ENSG00000136152_13:45503244-45503349	ENSG00000136152_13:45518960-45519094	NA	Chimpanzee	9598
ENSPTRG00000005918_12-9	3	ENSPTRG00000005918_13:45540405-45540546	ENSPTRG00000005918_13:45558965-45559114	ENSG00000083544_13:60467238-60467379	ENSG00000083544_13:60485799-60485948	NA	Chimpanzee	9598
ENSPTRG00000005918_15-6	7	ENSPTRG00000005918_13:45517832-45517897	ENSPTRG00000005918_13:45583442-45583567	ENSG00000083544_13:60444683-60444748	ENSG00000083544_13:60510630-60510755	NA	Chimpanzee	9598
ENSPTRG00000005918_17-6	8	ENSPTRG00000005918_13:45517832-45517897	ENSPTRG00000005918_13:45607912-45608037	ENSG00000083544_13:60444683-60444748	ENSG00000083544_13:60535108-60535233	NA	Chimpanzee	9598
ENSPTRG00000005927_19-12	7	ENSPTRG00000005927_13:58166269-58166434	ENSPTRG00000005927_13:58245993-58246077	ENSG00000083535_13:72893784-72893871	ENSG00000083535_13:72973591-72973675	NA	Chimpanzee	9598
ENSPTRG00000005935_53-37	16	ENSPTRG00000005935_13:61183509-61183623	ENSPTRG00000005935_13:61203573-61203869	ENSG00000136153_13:75833051-75833165	ENSG00000136153_13:75853092-75853388	NA	Chimpanzee	9598
ENSPTRG00000005994_12-5	7	ENSPTRG00000005994_13:84934946-84935073	ENSPTRG00000005994_13:85061220-85061339	ENSG00000134882_13:99238427-99238554	ENSG00000134882_13:99367787-99367906	NA	Chimpanzee	9598
ENSPTRG00000006009_11-6	6	ENSPTRG00000006009_13:88379416-88379540	ENSPTRG00000006009_13:88390797-88390896	ENSG00000134900_13:102618722-102618846	ENSG00000134900_13:102630096-102630195	NA	Chimpanzee	9598
ENSPTRG00000006320_10-5	6	ENSPTRG00000006320_14:33821640-33821718	ENSPTRG00000006320_14:33832696-33832768	ENSG00000197776_14:49723874-49723952	ENSG00000197776_14:49734589-49734661	NA	Chimpanzee	9598
ENSPTRG00000006393_12-6	7	ENSPTRG00000006393_14:42556869-42556959	ENSPTRG00000006393_14:42580846-42581012	ENSG00000032219_14:58306022-58306112	ENSG00000032219_14:58330003-58330169	NA	Chimpanzee	9598
ENSPTRG00000006395_25-18	8	ENSPTRG00000006395_14:42710545-42710772	ENSPTRG00000006395_14:42727829-42727947	ENSG00000100578_14:58459843-58460070	ENSG00000100578_14:58477123-58477241	NA	Chimpanzee	9598
ENSPTRG00000006395_33-10	24	ENSPTRG00000006395_14:42693455-42693629	ENSPTRG00000006395_14:42759393-42759547	ENSG00000100578_14:58442706-58442880	ENSG00000100578_14:58508555-58508709	NA	Chimpanzee	9598
ENSPTRG00000006395_35-33	3	ENSPTRG00000006395_14:42759393-42759547	ENSPTRG00000006395_14:42789835-42789900	ENSG00000100578_14:58508555-58508709	ENSG00000100578_14:58540071-58540136	NA	Chimpanzee	9598
ENSPTRG00000006472_8-6	5	ENSPTRG00000006472_14:52251453-52251589	ENSPTRG00000006472_14:52270818-52271001	ENSG00000182185_14:67865003-67865087	ENSG00000182185_14:67887021-67887204	NA	Chimpanzee	9598
ENSPTRG00000006500_10-9	2	ENSPTRG00000006500_14:55449688-55451394	ENSPTRG00000006500_14:55461312-55461444	ENSG00000100731_14:70976942-70978648	ENSG00000100731_14:70988567-70988699	NA	Chimpanzee	9598
ENSPTRG00000006560_33-26	9	ENSPTRG00000006560_14:60320575-60320732	ENSPTRG00000006560_14:60339068-60339451	ENSG00000119685_14:75764615-75764772	ENSG00000119685_14:75783147-75783530	NA	Chimpanzee	9598
ENSPTRG00000006560_41-32	7	ENSPTRG00000006560_14:60338408-60338494	ENSPTRG00000006560_14:60458197-60458279	ENSG00000119685_14:75782487-75782573	ENSG00000119650_14:75902136-75902224	NA	Chimpanzee	9598
ENSPTRG00000006872_102-94	9	ENSPTRG00000006872_15:14080598-14080704	ENSPTRG00000006872_15:14088736-14088809	ENSG00000198838_15:33818578-33818684	ENSG00000198838_15:33825603-33825676	NA	Chimpanzee	9598
ENSPTRG00000006872_19-9	11	ENSPTRG00000006872_15:13790660-13790772	ENSPTRG00000006872_15:13837301-13837419	ENSG00000198838_15:33539350-33539462	ENSG00000198838_15:33585998-33586116	NA	Chimpanzee	9598
ENSPTRG00000006872_80-65	15	ENSPTRG00000006872_15:14008127-14008242	ENSPTRG00000006872_15:14041223-14041463	ENSG00000198838_15:33755065-33755180	ENSG00000198838_15:33788218-33788458	NA	Chimpanzee	9598
ENSPTRG00000006953_15-8	6	ENSPTRG00000006953_15:22248100-22248231	ENSPTRG00000006953_15:22276207-22276724	ENSG00000174197_15:41707728-41707859	ENSG00000174197_15:41736181-41736698	NA	Chimpanzee	9598
ENSPTRG00000006991_9-2	7	ENSPTRG00000006991_15:23922246-23922376	ENSPTRG00000006991_15:23937513-23937613	ENSG00000168803_15:43335696-43335826	ENSG00000168803_15:43350941-43351041	NA	Chimpanzee	9598
ENSPTRG00000007072_17-17	1	ENSPTRG00000007072_15:31615044-31615346	ENSPTRG00000007072_15:31615044-31615346	ENSG00000081014_15:50958492-50958794	ENSG00000081014_15:50958492-50958794	NA	Chimpanzee	9598
ENSPTRG00000007160_8-5	3	ENSPTRG00000007160_15:45248809-45248938	ENSPTRG00000007160_15:45260993-45261180	ENSG00000103671_15:64406330-64406459	ENSG00000103671_15:64418541-64418728	NA	Chimpanzee	9598
ENSPTRG00000007207_18-14	6	ENSPTRG00000007207_15:48613062-48613123	ENSPTRG00000007207_15:48657895-48657966	ENSG00000137764_15:67658553-67658614	ENSG00000137764_15:67703337-67703408	NA	Chimpanzee	9598
ENSPTRG00000007342_11-6	6	ENSPTRG00000007342_15:59472516-59472585	ENSPTRG00000007342_15:59485046-59485162	ENSG00000136381_15:78470532-78470601	ENSG00000136381_15:78483318-78483434	NA	Chimpanzee	9598
ENSPTRG00000007342_21-17	5	ENSPTRG00000007342_15:59492149-59492253	ENSPTRG00000007342_15:59498887-59499072	ENSG00000136381_15:78490422-78490526	ENSG00000136381_15:78497126-78497311	NA	Chimpanzee	9598
ENSPTRG00000007394_16-9	8	ENSPTRG00000007394_15:64850919-64851030	ENSPTRG00000007394_15:64889813-64889942	ENSG00000156218_15:83885101-83885212	ENSG00000156218_15:83923904-83924033	NA	Chimpanzee	9598
ENSPTRG00000007394_22-20	3	ENSPTRG00000007394_15:64948085-64949156	ENSPTRG00000007394_15:64956911-64957039	ENSG00000156218_15:83982273-83983344	ENSG00000156218_15:83991086-83991214	NA	Chimpanzee	9598
ENSPTRG00000007414_15-15	1	ENSPTRG00000007414_15:66324651-66325021	ENSPTRG00000007414_15:66324651-66325021	ENSG00000170776_15:85655417-85655787	ENSG00000170776_15:85655417-85655787	NA	Chimpanzee	9598
ENSPTRG00000007414_22-15	8	ENSPTRG00000007414_15:66324651-66325021	ENSPTRG00000007414_15:66362480-66362654	ENSG00000170776_15:85655417-85655787	ENSG00000170776_15:85693099-85693451	NA	Chimpanzee	9598
ENSPTRG00000007414_25-15	11	ENSPTRG00000007414_15:66324651-66325021	ENSPTRG00000007414_15:66379319-66379385	ENSG00000170776_15:85655417-85655787	ENSG00000170776_15:85710443-85710645	NA	Chimpanzee	9598
ENSPTRG00000007414_9-3	7	ENSPTRG00000007414_15:66191135-66191282	ENSPTRG00000007414_15:66255141-66255262	ENSG00000170776_15:85521428-85521575	ENSG00000170776_15:85585702-85585823	NA	Chimpanzee	9598
ENSPTRG00000007430_14-12	3	ENSPTRG00000007430_15:70040475-70040567	ENSPTRG00000007430_15:70043794-70043974	ENSG00000140525_15:89273377-89273469	ENSG00000140525_15:89276711-89276891	NA	Chimpanzee	9598
ENSPTRG00000007792_9-6	1	ENSPTRG00000007792_16:15070673-15070754	ENSPTRG00000007792_16:15070673-15070754	ENSG00000140694_16:14627106-14627187	ENSG00000140694_16:14627106-14627187	NA	Chimpanzee	9598
ENSPTRG00000007812_24-24	1	ENSPTRG00000007812_16:16392222-16392429	ENSPTRG00000007812_16:16392222-16392429	ENSG00000103222_16:16111375-16111582	ENSG00000103222_16:16111375-16111582	NA	Chimpanzee	9598
ENSPTRG00000007827_12-6	7	ENSPTRG00000007827_16:18580299-18580447	ENSPTRG00000007827_16:18606780-18606937	ENSG00000170537_16:19016450-19016598	ENSG00000170537_16:19040289-19040446	NA	Chimpanzee	9598
ENSPTRG00000007835_19-13	7	ENSPTRG00000007835_16:19160637-19160721	ENSPTRG00000007835_16:19184642-19184764	ENSG00000103544_16:19591790-19591874	ENSG00000103544_16:19616686-19616808	NA	Chimpanzee	9598
ENSPTRG00000007838_6-5	2	ENSPTRG00000007838_16:19332648-19332700	ENSPTRG00000007838_16:19332835-19332912	ENSG00000174628_16:19763848-19763900	ENSG00000174628_16:19763848-19764112	NA	Chimpanzee	9598
ENSPTRG00000007956_19-15	5	ENSPTRG00000007956_16:12602486-12602568	ENSPTRG00000007956_16:12805312-12805393	ENSG00000048471_16:12199601-12199683	ENSG00000048471_16:12403448-12403529	NA	Chimpanzee	9598
ENSPTRG00000008090_17-12	5	ENSPTRG00000008090_16:38048302-38048397	ENSPTRG00000008090_16:38071864-38071958	ENSG00000102893_16:47587668-47587763	ENSG00000102893_16:47610826-47610920	NA	Chimpanzee	9598
ENSPTRG00000008090_23-17	7	ENSPTRG00000008090_16:38071864-38071958	ENSPTRG00000008090_16:38111786-38111876	ENSG00000102893_16:47610826-47610920	ENSG00000102893_16:47650830-47650921	NA	Chimpanzee	9598
ENSPTRG00000008090_23-5	17	ENSPTRG00000008090_16:37956979-37957068	ENSPTRG00000008090_16:38111786-38111876	ENSG00000102893_16:47497399-47497488	ENSG00000102893_16:47650830-47650921	NA	Chimpanzee	9598
ENSPTRG00000008100_12-7	6	ENSPTRG00000008100_16:40628665-40628942	ENSPTRG00000008100_16:40644681-40644769	ENSG00000155393_16:50078741-50079018	ENSG00000155393_16:50094705-50094793	NA	Chimpanzee	9598
ENSPTRG00000008100_14-3	12	ENSPTRG00000008100_16:40618682-40618769	ENSPTRG00000008100_16:40652247-40652423	ENSG00000155393_16:50068780-50068867	ENSG00000155393_16:50102259-50102435	NA	Chimpanzee	9598
ENSPTRG00000008100_7-7	1	ENSPTRG00000008100_16:40628665-40628942	ENSPTRG00000008100_16:40628665-40628942	ENSG00000155393_16:50078741-50079018	ENSG00000155393_16:50078741-50079018	NA	Chimpanzee	9598
ENSPTRG00000008260_13-11	2	ENSPTRG00000008260_16:59094444-59095451	ENSPTRG00000008260_16:59117939-59118042	ENSG00000072736_16:68190768-68191775	ENSG00000072736_16:68214329-68214432	NA	Chimpanzee	9598
ENSPTRG00000008260_4-4	1	ENSPTRG00000008260_16:59014255-59015389	ENSPTRG00000008260_16:59014255-59015389	ENSG00000072736_16:68121987-68123121	ENSG00000072736_16:68121987-68123121	NA	Chimpanzee	9598
ENSPTRG00000008260_8-5	4	ENSPTRG00000008260_16:59018716-59018878	ENSPTRG00000008260_16:59078068-59078208	ENSG00000072736_16:68126448-68126610	ENSG00000072736_16:68174374-68174514	NA	Chimpanzee	9598
ENSPTRG00000008260_9-6	4	ENSPTRG00000008260_16:59061557-59061756	ENSPTRG00000008260_16:59085160-59085215	ENSG00000072736_16:68157869-68158068	ENSG00000072736_16:68181475-68181530	NA	Chimpanzee	9598
ENSPTRG00000008272_10-3	8	ENSPTRG00000008272_16:59761758-59762398	ENSPTRG00000008272_16:59819254-59819430	ENSG00000103047_16:68859884-68860524	ENSG00000103047_16:68902328-68902504	NA	Chimpanzee	9598
ENSPTRG00000008272_15-3	13	ENSPTRG00000008272_16:59761758-59762398	ENSPTRG00000008272_16:59847107-59847164	ENSG00000103047_16:68859884-68860524	ENSG00000103047_16:68930238-68930295	NA	Chimpanzee	9598
ENSPTRG00000008276_5-5	1	ENSPTRG00000008276_16:60217508-60217704	ENSPTRG00000008276_16:60217508-60217704	ENSG00000168807_16:69284048-69284244	ENSG00000168807_16:69284048-69284244	NA	Chimpanzee	9598
ENSPTRG00000008283_19-19	1	ENSPTRG00000008283_16:60640454-60640697	ENSPTRG00000008283_16:60640454-60640697	ENSG00000102908_16:69695136-69695379	ENSG00000102908_16:69695136-69695379	NA	Chimpanzee	9598
ENSPTRG00000009008_2-2	1	ENSPTRG00000009008_17:22234794-22235344	ENSPTRG00000009008_17:22234794-22235344	ENSG00000005156_17:34983002-34983552	ENSG00000005156_17:34983002-34983552	NA	Chimpanzee	9598
ENSPTRG00000009054_7-7	1	ENSPTRG00000009054_17:20017117-20017274	ENSPTRG00000009054_17:20017117-20017274	ENSG00000276234_17:37440505-37440662	ENSG00000276234_17:37440505-37440662	NA	Chimpanzee	9598
ENSPTRG00000009423_13-2	10	ENSPTRG00000009423_17:54226490-54226567	ENSPTRG00000009423_17:54287972-54288037	ENSG00000166263_17:54985614-54985691	ENSG00000166263_17:55047089-55047154	NA	Chimpanzee	9598
ENSPTRG00000009423_17-2	14	ENSPTRG00000009423_17:54226490-54226567	ENSPTRG00000009423_17:54321883-54322016	ENSG00000166263_17:54985614-54985691	ENSG00000166263_17:55081050-55081183	NA	Chimpanzee	9598
ENSPTRG00000009423_9-5	5	ENSPTRG00000009423_17:54231700-54231832	ENSPTRG00000009423_17:54248341-54248432	ENSG00000166263_17:54990825-54990957	ENSG00000166263_17:55007506-55007597	NA	Chimpanzee	9598
ENSPTRG00000009488_26-19	6	ENSPTRG00000009488_17:60292217-60292350	ENSPTRG00000009488_17:60386249-60386349	ENSG00000141376_17:60947219-60947352	ENSG00000141376_17:61040792-61040892	NA	Chimpanzee	9598
ENSPTRG00000009488_26-20	5	ENSPTRG00000009488_17:60335541-60335805	ENSPTRG00000009488_17:60386249-60386349	ENSG00000141376_17:60989971-60990235	ENSG00000141376_17:61040792-61040892	NA	Chimpanzee	9598
ENSPTRG00000009506_20-10	7	ENSPTRG00000009506_17:61957647-61957742	ENSPTRG00000009506_17:62010179-62010245	ENSG00000146872_17:62524236-62524331	ENSG00000146872_17:62576709-62576775	NA	Chimpanzee	9598
ENSPTRG00000009693_14-5	10	ENSPTRG00000009693_17:76330286-76330393	ENSPTRG00000009693_17:76367292-76367427	ENSG00000092931_17:76740957-76740990	ENSG00000092931_17:76776406-76776541	NA	Chimpanzee	9598
ENSPTRG00000009805_12-4	10	ENSPTRG00000009805_17:82266203-82266283	ENSPTRG00000009805_17:82286365-82286494	ENSG00000141562_17:82459992-82460072	ENSG00000141562_17:82480468-82481211	NA	Chimpanzee	9598
ENSPTRG00000009811_15-7	9	ENSPTRG00000009811_17:82611056-82611188	ENSPTRG00000009811_17:82662042-82662136	ENSG00000141556_17:82781589-82781721	ENSG00000141556_17:82814840-82814934	NA	Chimpanzee	9598
ENSPTRG00000009811_18-2	16	ENSPTRG00000009811_17:82586206-82586256	ENSPTRG00000009811_17:82741142-82741227	ENSG00000141556_17:82756165-82756215	ENSG00000141556_17:82893547-82893632	NA	Chimpanzee	9598
ENSPTRG00000009919_15-14	2	ENSPTRG00000009919_18:20595154-20595243	ENSPTRG00000009919_18:20595333-20595438	ENSG00000141452_18:23518890-23518979	ENSG00000141452_18:23519069-23519174	NA	Chimpanzee	9598
ENSPTRG00000009923_20-15	5	ENSPTRG00000009923_18:21191720-21191813	ENSPTRG00000009923_18:21207426-21207530	ENSG00000168234_18:24114554-24115032	ENSG00000168234_18:24130313-24130417	NA	Chimpanzee	9598
ENSPTRG00000009981_8-2	6	ENSPTRG00000009981_18:33982583-33982618	ENSPTRG00000009981_18:34107335-34107462	ENSG00000150477_18:36834203-36834355	ENSG00000150477_18:36959308-36959435	NA	Chimpanzee	9598
ENSPTRG00000010053_14-9	6	ENSPTRG00000010053_18:56111547-56111579	ENSPTRG00000010053_18:56134920-56134994	ENSG00000172175_18:58710921-58710953	ENSG00000172175_18:58733510-58734566	NA	Chimpanzee	9598
ENSPTRG00000010074_33-14	16	ENSPTRG00000010074_18:59713282-59713394	ENSPTRG00000010074_18:59760075-59760163	ENSG00000134444_18:62244764-62244876	ENSG00000134444_18:62291543-62291631	NA	Chimpanzee	9598
ENSPTRG00000010094_11-7	5	ENSPTRG00000010094_18:63342478-63342731	ENSPTRG00000010094_18:63361226-63361477	ENSG00000081138_18:65843812-65844065	ENSG00000081138_18:65862666-65862917	NA	Chimpanzee	9598
ENSPTRG00000010123_28-22	7	ENSPTRG00000010123_18:74663520-74663802	ENSPTRG00000010123_18:74681396-74681583	ENSG00000130856_18:76919776-76920058	ENSG00000130856_18:76937156-76937343	NA	Chimpanzee	9598
ENSPTRG00000010127_13-11	3	ENSPTRG00000010127_18:76999590-76999670	ENSPTRG00000010127_18:77013915-77013990	ENSG00000166377_18:79193183-79193263	ENSG00000166377_18:79206936-79207012	NA	Chimpanzee	9598
ENSPTRG00000010127_20-11	10	ENSPTRG00000010127_18:76999590-76999670	ENSPTRG00000010127_18:77152609-77152701	ENSG00000166377_18:79193183-79193263	ENSG00000166377_18:79330012-79330104	NA	Chimpanzee	9598
ENSPTRG00000010550_11-9	1	ENSPTRG00000010550_19:13661975-13662103	ENSPTRG00000010550_19:13661975-13662103	ENSG00000179115_19:12928398-12928663	ENSG00000179115_19:12928398-12928663	NA	Chimpanzee	9598
ENSPTRG00000010658_16-13	3	ENSPTRG00000010658_19:18128299-18128440	ENSPTRG00000010658_19:18136896-18137009	ENSG00000099331_19:17172336-17172477	ENSG00000099331_19:17180645-17181040	NA	Chimpanzee	9598
ENSPTRG00000010658_31-26	5	ENSPTRG00000010658_19:18156256-18156389	ENSPTRG00000010658_19:18158093-18158266	ENSG00000099331_19:17200293-17200426	ENSG00000099331_19:17202129-17202303	NA	Chimpanzee	9598
ENSPTRG00000010658_9-6	4	ENSPTRG00000010658_19:18109923-18110022	ENSPTRG00000010658_19:18115365-18115454	ENSG00000099331_19:17153967-17154066	ENSG00000099331_19:17159395-17159484	NA	Chimpanzee	9598
ENSPTRG00000010917_11-11	1	ENSPTRG00000010917_19:40093116-40093390	ENSPTRG00000010917_19:40093116-40093390	ENSG00000105738_19:38130498-38130772	ENSG00000105738_19:38130498-38130772	NA	Chimpanzee	9598
ENSPTRG00000010917_13-3	8	ENSPTRG00000010917_19:40055374-40055562	ENSPTRG00000010917_19:40106222-40106359	ENSG00000105738_19:38099962-38100150	ENSG00000105738_19:38142573-38142710	NA	Chimpanzee	9598
ENSPTRG00000010917_17-17	1	ENSPTRG00000010917_19:40145900-40146121	ENSPTRG00000010917_19:40145900-40146121	ENSG00000105738_19:38182519-38182740	ENSG00000105738_19:38182519-38182740	NA	Chimpanzee	9598
ENSPTRG00000013198_25-4	23	ENSPTRG00000013198_20:3403862-3403975	ENSPTRG00000013198_20:3467049-3467206	ENSG00000088812_20:3540222-3540335	ENSG00000088812_20:3604105-3604262	NA	Chimpanzee	9598
ENSPTRG00000013242_37-32	6	ENSPTRG00000013242_20:9326533-9326683	ENSPTRG00000013242_20:9349172-9349347	ENSG00000101333_20:9437002-9437152	ENSG00000101333_20:9459635-9459810	NA	Chimpanzee	9598
ENSPTRG00000013308_17-5	13	ENSPTRG00000013308_20:21414931-21414989	ENSPTRG00000013308_20:21430928-21431063	ENSG00000088930_20:21330481-21330539	ENSG00000088930_20:21346415-21346550	NA	Chimpanzee	9598
ENSPTRG00000013360_6-4	4	ENSPTRG00000013360_20:33134720-33134843	ENSPTRG00000013360_20:33139715-33139837	ENSG00000088325_20:31766556-31766682	ENSG00000088325_20:31771560-31771682	NA	Chimpanzee	9598
ENSPTRG00000013488_14-7	7	ENSPTRG00000013488_20:40058423-40058601	ENSPTRG00000013488_20:40068131-40068278	ENSG00000170471_20:38516192-38516370	ENSG00000170471_20:38525895-38526042	NA	Chimpanzee	9598
ENSPTRG00000013597_20-18	3	ENSPTRG00000013597_20:50720971-50721070	ENSPTRG00000013597_20:50723418-50723526	ENSG00000124198_20:48972326-48972425	ENSG00000124198_20:48974766-48974874	NA	Chimpanzee	9598
ENSPTRG00000013597_21-8	13	ENSPTRG00000013597_20:50699516-50699662	ENSPTRG00000013597_20:50724667-50724850	ENSG00000124198_20:48951323-48951469	ENSG00000124198_20:48976016-48976199	NA	Chimpanzee	9598
ENSPTRG00000014415_5-5	1	ENSPTRG00000014415_22:27526448-27526855	ENSPTRG00000014415_22:27526448-27526855	ENSG00000196236_22:40881770-40882177	ENSG00000196236_22:40881770-40882177	NA	Chimpanzee	9598
ENSPTRG00000014415_9-5	5	ENSPTRG00000014415_22:27526448-27526855	ENSPTRG00000014415_22:27558603-27558688	ENSG00000196236_22:40881770-40882177	ENSG00000196236_22:40914239-40914324	NA	Chimpanzee	9598
ENSPTRG00000014560_17-6	12	ENSPTRG00000014560_3:1308319-1308522	ENSPTRG00000014560_3:1390895-1390965	ENSG00000134115_3:1295601-1295804	ENSG00000134115_3:1377005-1377075	NA	Chimpanzee	9598
ENSPTRG00000014560_17-8	10	ENSPTRG00000014560_3:1335578-1335762	ENSPTRG00000014560_3:1390895-1390965	ENSG00000134115_3:1321650-1321834	ENSG00000134115_3:1377005-1377075	NA	Chimpanzee	9598
ENSPTRG00000014661_18-3	15	ENSPTRG00000014661_3:15574401-15574509	ENSPTRG00000014661_3:15603192-15603291	ENSG00000131375_3:15212104-15212212	ENSG00000131375_3:15240754-15240853	NA	Chimpanzee	9598
ENSPTRG00000014685_12-3	10	ENSPTRG00000014685_3:20529137-20529263	ENSPTRG00000014685_3:20584149-20584275	ENSG00000114166_3:20072333-20072459	ENSG00000114166_3:20127423-20127549	NA	Chimpanzee	9598
ENSPTRG00000014685_19-3	17	ENSPTRG00000014685_3:20529137-20529263	ENSPTRG00000014685_3:20605130-20605214	ENSG00000114166_3:20072333-20072459	ENSG00000114166_3:20148403-20148487	NA	Chimpanzee	9598
ENSPTRG00000014709_14-7	7	ENSPTRG00000014709_3:30373302-30373459	ENSPTRG00000014709_3:30597086-30597196	ENSG00000144642_3:29739720-29739877	ENSG00000144642_3:29936086-29936196	NA	Chimpanzee	9598
ENSPTRG00000014709_15-12	4	ENSPTRG00000014709_3:30558744-30558840	ENSPTRG00000014709_3:30605219-30605266	ENSG00000144642_3:29897379-29897475	ENSG00000144642_3:29944207-29944254	NA	Chimpanzee	9598
ENSPTRG00000014709_15-9	6	ENSPTRG00000014709_3:30522037-30522143	ENSPTRG00000014709_3:30605219-30605266	ENSG00000144642_3:29868858-29868964	ENSG00000144642_3:29944207-29944254	NA	Chimpanzee	9598
ENSPTRG00000014722_16-8	8	ENSPTRG00000014722_3:33395995-33396145	ENSPTRG00000014722_3:33426801-33426977	ENSG00000182973_3:32708670-32708820	ENSG00000182973_3:32734800-32734976	NA	Chimpanzee	9598
ENSPTRG00000015031_37-19	18	ENSPTRG00000015031_3:56025079-56025162	ENSPTRG00000015031_3:56173039-56173150	ENSG00000157445_3:54871539-54871622	ENSG00000157445_3:55018206-55018317	NA	Chimpanzee	9598
ENSPTRG00000015031_9-7	3	ENSPTRG00000015031_3:55708313-55708444	ENSPTRG00000015031_3:55715454-55715604	ENSG00000157445_3:54562800-54562931	ENSG00000157445_3:54569954-54570104	NA	Chimpanzee	9598
ENSPTRG00000015045_22-3	18	ENSPTRG00000015045_3:58395852-58395950	ENSPTRG00000015045_3:58417261-58417443	ENSG00000157500_3:57235566-57235664	ENSG00000157500_3:57257246-57257428	NA	Chimpanzee	9598
ENSPTRG00000015056_5-2	2	ENSPTRG00000015056_3:59456141-59456205	ENSPTRG00000015056_3:59473450-59473606	ENSG00000163686_3:58249878-58249942	ENSG00000163686_3:58267189-58267345	NA	Chimpanzee	9598
ENSPTRG00000015067_2-2	1	ENSPTRG00000015067_3:62966450-62966554	ENSPTRG00000015067_3:62966450-62966554	ENSG00000144724_3:61748878-61748982	ENSG00000144724_3:61748878-61748982	NA	Chimpanzee	9598
ENSPTRG00000015117_22-16	6	ENSPTRG00000015117_3:79089489-79089720	ENSPTRG00000015117_3:79119355-79119636	ENSG00000185008_3:77574499-77574730	ENSG00000185008_3:77602210-77602491	NA	Chimpanzee	9598
ENSPTRG00000015127_15-14	2	ENSPTRG00000015127_3:91259491-91259640	ENSPTRG00000015127_3:91260431-91260624	ENSG00000044524_3:89449225-89449374	ENSG00000044524_3:89450177-89450370	NA	Chimpanzee	9598
ENSPTRG00000015129_5-5	1	ENSPTRG00000015129_3:96486835-96487084	ENSPTRG00000015129_3:96486835-96487084	ENSG00000169379_3:94003659-94003908	ENSG00000169379_3:94003659-94003908	NA	Chimpanzee	9598
ENSPTRG00000015274_25-14	11	ENSPTRG00000015274_3:124387187-124387341	ENSPTRG00000015274_3:124446499-124446570	ENSG00000145087_3:121223003-121223157	ENSG00000145087_3:121282266-121282337	NA	Chimpanzee	9598
ENSPTRG00000015302_15-11	5	ENSPTRG00000015302_3:126315496-126315587	ENSPTRG00000015302_3:126337512-126337672	ENSG00000065485_3:123124066-123124157	ENSG00000065485_3:123146099-123146259	NA	Chimpanzee	9598
ENSPTRG00000015311_48-34	15	ENSPTRG00000015311_3:127670286-127670401	ENSPTRG00000015311_3:127720294-127720396	ENSG00000160145_3:124446161-124446276	ENSG00000160145_3:124496311-124496413	NA	Chimpanzee	9598
ENSPTRG00000015362_13-4	9	ENSPTRG00000015362_3:132145763-132145856	ENSPTRG00000015362_3:132165487-132165606	ENSG00000177646_3:128884653-128884746	ENSG00000177646_3:128904358-128904505	NA	Chimpanzee	9598
ENSPTRG00000015427_10-2	8	ENSPTRG00000015427_3:138265774-138265838	ENSPTRG00000015427_3:138531863-138531985	ENSG00000154928_3:134925816-134925880	ENSG00000154928_3:135179860-135179982	NA	Chimpanzee	9598
ENSPTRG00000015429_2-2	1	ENSPTRG00000015429_3:139365082-139367516	ENSPTRG00000015429_3:139365082-139367516	ENSG00000073711_3:136001059-136003493	ENSG00000073711_3:136001059-136003493	NA	Chimpanzee	9598
ENSPTRG00000015429_6-2	4	ENSPTRG00000015429_3:139365082-139367516	ENSPTRG00000015429_3:139413199-139413301	ENSG00000073711_3:136001059-136003493	ENSG00000073711_3:136049259-136049361	NA	Chimpanzee	9598
ENSPTRG00000015431_21-17	3	ENSPTRG00000015431_3:139690262-139690369	ENSPTRG00000015431_3:139692217-139692316	ENSG00000114054_3:136326803-136326910	ENSG00000114054_3:136328758-136328857	NA	Chimpanzee	9598
ENSPTRG00000015442_12-8	5	ENSPTRG00000015442_3:141617947-141618018	ENSPTRG00000015442_3:141630986-141631066	ENSG00000114098_3:138221926-138221997	ENSG00000114098_3:138235034-138235114	NA	Chimpanzee	9598
ENSPTRG00000015472_19-10	10	ENSPTRG00000015472_3:145008826-145008982	ENSPTRG00000015472_3:145024557-145024663	ENSG00000155903_3:141570912-141571068	ENSG00000155903_3:141586646-141586752	NA	Chimpanzee	9598
ENSPTRG00000015512_14-4	11	ENSPTRG00000015512_3:152629743-152630237	ENSPTRG00000015512_3:152651873-152652058	ENSG00000163755_3:149140004-149140498	ENSG00000163755_3:149162148-149162333	NA	Chimpanzee	9598
ENSPTRG00000015512_16-5	12	ENSPTRG00000015512_3:152630756-152630927	ENSPTRG00000015512_3:152653562-152653669	ENSG00000163755_3:149141017-149141188	ENSG00000163755_3:149163842-149163949	NA	Chimpanzee	9598
ENSPTRG00000015546_14-9	6	ENSPTRG00000015546_3:157758762-157758914	ENSPTRG00000015546_3:157810684-157810893	ENSG00000114790_3:154187685-154187837	ENSG00000114790_3:154240370-154240579	NA	Chimpanzee	9598
ENSPTRG00000015555_12-3	6	ENSPTRG00000015555_3:159468880-159468994	ENSPTRG00000015555_3:159487654-159487779	ENSG00000163655_3:155897927-155898041	ENSG00000163655_3:155925241-155925366	NA	Chimpanzee	9598
ENSPTRG00000015634_25-8	18	ENSPTRG00000015634_3:176519474-176519581	ENSPTRG00000015634_3:176579666-176579812	ENSG00000114346_3:172760156-172760263	ENSG00000114346_3:172816691-172816837	NA	Chimpanzee	9598
ENSPTRG00000015660_14-7	8	ENSPTRG00000015660_3:186786256-186786363	ENSPTRG00000015660_3:186809350-186809547	ENSG00000058063_3:182836035-182836142	ENSG00000058063_3:182859162-182859359	NA	Chimpanzee	9598
ENSPTRG00000015670_13-2	12	ENSPTRG00000015670_3:187687613-187687731	ENSPTRG00000015670_3:187732197-187732300	ENSG00000163872_3:183715144-183715262	ENSG00000163872_3:183758862-183758965	NA	Chimpanzee	9598
ENSPTRG00000015670_20-16	4	ENSPTRG00000015670_3:187745658-187745916	ENSPTRG00000015670_3:187759116-187759292	ENSG00000163872_3:183772305-183772563	ENSG00000163872_3:183786125-183786301	NA	Chimpanzee	9598
ENSPTRG00000015698_45-38	8	ENSPTRG00000015698_3:188968884-188969003	ENSPTRG00000015698_3:189001436-189001583	ENSG00000156931_3:184924862-184924981	ENSG00000156931_3:184957374-184957521	NA	Chimpanzee	9598
ENSPTRG00000015700_7-6	2	ENSPTRG00000015700_3:189516776-189516934	ENSPTRG00000015700_3:189518882-189519040	ENSG00000073803_3:185447789-185447947	ENSG00000073803_3:185449900-185450058	NA	Chimpanzee	9598
ENSPTRG00000015703_18-14	5	ENSPTRG00000015703_3:189705012-189705143	ENSPTRG00000015703_3:189713887-189713982	ENSG00000163904_3:185617480-185617509	ENSG00000163904_3:185626298-185626393	NA	Chimpanzee	9598
ENSPTRG00000015926_30-13	17	ENSPTRG00000015926_4:15821816-15821917	ENSPTRG00000015926_4:15874661-15874828	ENSG00000048342_4:15510139-15510240	ENSG00000048342_4:15563310-15563522	NA	Chimpanzee	9598
ENSPTRG00000015970_14-10	5	ENSPTRG00000015970_4:27101612-27101684	ENSPTRG00000015970_4:27123634-27123696	ENSG00000109680_4:26666333-26666405	ENSG00000109680_4:26688345-26688407	NA	Chimpanzee	9598
ENSPTRG00000015971_10-5	7	ENSPTRG00000015971_4:27353360-27353490	ENSPTRG00000015971_4:27433868-27434045	ENSG00000109689_4:26919504-26919634	ENSG00000109689_4:27002927-27003104	NA	Chimpanzee	9598
ENSPTRG00000015981_14-9	6	ENSPTRG00000015981_4:38401802-38401906	ENSPTRG00000015981_4:38431337-38431423	ENSG00000065882_4:38020591-38020695	ENSG00000065882_4:38045817-38045903	NA	Chimpanzee	9598
ENSPTRG00000016382_33-29	4	ENSPTRG00000016382_4:116379963-116380035	ENSPTRG00000016382_4:116415685-116415720	ENSG00000145362_4:113302767-113302839	ENSG00000145362_4:113323759-113323794	NA	Chimpanzee	9598
ENSPTRG00000016382_54-30	18	ENSPTRG00000016382_4:116388152-116388296	ENSPTRG00000016382_4:116461204-116461495	ENSG00000145362_4:113311255-113311399	ENSG00000145362_4:113369514-113369805	NA	Chimpanzee	9598
ENSPTRG00000016423_14-11	5	ENSPTRG00000016423_4:125929908-125930117	ENSPTRG00000016423_4:125992272-125992398	ENSG00000145375_4:123028186-123028395	ENSG00000145375_4:123090579-123090705	NA	Chimpanzee	9598
ENSPTRG00000016433_16-7	9	ENSPTRG00000016433_4:130805153-130805275	ENSPTRG00000016433_4:130814537-130814670	ENSG00000164070_4:127798587-127798709	ENSG00000164070_4:127807996-127808129	NA	Chimpanzee	9598
ENSPTRG00000016436_16-16	1	ENSPTRG00000016436_4:131050529-131050907	ENSPTRG00000016436_4:131050529-131050907	ENSG00000164074_4:128028475-128028853	ENSG00000164074_4:128028475-128028853	NA	Chimpanzee	9598
ENSPTRG00000016497_15-6	9	ENSPTRG00000016497_4:151619244-151619354	ENSPTRG00000016497_4:151699526-151699613	ENSG00000071205_4:147864846-147864956	ENSG00000071205_4:147946239-147946704	NA	Chimpanzee	9598
ENSPTRG00000016497_20-7	13	ENSPTRG00000016497_4:151621113-151621217	ENSPTRG00000016497_4:151818819-151818978	ENSG00000071205_4:147866712-147866816	ENSG00000071205_4:148046892-148047051	NA	Chimpanzee	9598
ENSPTRG00000016504_3-3	1	ENSPTRG00000016504_4:153885686-153886020	ENSPTRG00000016504_4:153885686-153886020	ENSG00000170390_4:150102478-150102812	ENSG00000170390_4:150102478-150102812	NA	Chimpanzee	9598
ENSPTRG00000016527_31-9	18	ENSPTRG00000016527_4:157419777-157419854	ENSPTRG00000016527_4:157445626-157446254	ENSG00000121210_4:153580826-153580903	ENSG00000121210_4:153603802-153604430	NA	Chimpanzee	9598
ENSPTRG00000016550_13-5	7	ENSPTRG00000016550_4:162094918-162095040	ENSPTRG00000016550_4:162124070-162124123	ENSG00000164124_4:158215191-158215313	ENSG00000164124_4:158244296-158244349	NA	Chimpanzee	9598
ENSPTRG00000016551_14-11	4	ENSPTRG00000016551_4:162502142-162502213	ENSPTRG00000016551_4:162511307-162511381	ENSG00000171509_4:158607972-158608043	ENSG00000171509_4:158617131-158617205	NA	Chimpanzee	9598
ENSPTRG00000016577_19-4	14	ENSPTRG00000016577_4:170022022-170022132	ENSPTRG00000016577_4:170092381-170092541	ENSG00000038295_4:165989381-165989491	ENSG00000038295_4:166060028-166060188	NA	Chimpanzee	9598
ENSPTRG00000016577_20-4	15	ENSPTRG00000016577_4:170022022-170022132	ENSPTRG00000016577_4:170098034-170098214	ENSG00000038295_4:165989381-165989491	ENSG00000038295_4:166065683-166065863	NA	Chimpanzee	9598
ENSPTRG00000016633_24-7	18	ENSPTRG00000016633_4:187996165-187996264	ENSPTRG00000016633_4:188016070-188016189	ENSG00000168538_4:183674713-183674870	ENSG00000168538_4:183694604-183694723	NA	Chimpanzee	9598
ENSPTRG00000016642_4-2	3	ENSPTRG00000016642_4:188972541-188972776	ENSPTRG00000016642_4:188977216-188977345	ENSG00000164306_4:184657082-184657320	ENSG00000164306_4:184661774-184661903	NA	Chimpanzee	9598
ENSPTRG00000016642_5-2	4	ENSPTRG00000016642_4:188972541-188972776	ENSPTRG00000016642_4:188981357-188981504	ENSG00000164306_4:184657082-184657320	ENSG00000164306_4:184665917-184666064	NA	Chimpanzee	9598
ENSPTRG00000016642_8-4	4	ENSPTRG00000016642_4:188977216-188977345	ENSPTRG00000016642_4:188997587-188997675	ENSG00000164306_4:184661774-184661903	ENSG00000164306_4:184682248-184682336	NA	Chimpanzee	9598
ENSPTRG00000016935_22-22	1	ENSPTRG00000016935_5:48324831-48326376	ENSPTRG00000016935_5:48324831-48326376	ENSG00000112851_5:66053406-66054951	ENSG00000112851_5:66053406-66054951	NA	Chimpanzee	9598
ENSPTRG00000016961_17-17	1	ENSPTRG00000016961_5:44375194-44376880	ENSPTRG00000016961_5:44375194-44376880	ENSG00000145734_5:71509465-71511151	ENSG00000145734_5:71509465-71511151	NA	Chimpanzee	9598
ENSPTRG00000017079_6-6	2	ENSPTRG00000017079_5:20863270-20863413	ENSPTRG00000017079_5:20863270-20863413	ENSG00000133302_5:94651702-94651845	ENSG00000133302_5:94651702-94651845	NA	Chimpanzee	9598
ENSPTRG00000017143_24-3	22	ENSPTRG00000017143_5:113068381-113068577	ENSPTRG00000017143_5:113122607-113122716	ENSG00000047188_5:113524981-113525177	ENSG00000047188_5:113579586-113579695	NA	Chimpanzee	9598
ENSPTRG00000017143_28-4	24	ENSPTRG00000017143_5:113069987-113070186	ENSPTRG00000017143_5:113135098-113135280	ENSG00000047188_5:113526586-113526703	ENSG00000047188_5:113591996-113592178	NA	Chimpanzee	9598
ENSPTRG00000017195_7-2	6	ENSPTRG00000017195_5:127400268-127400390	ENSPTRG00000017195_5:127415921-127416024	ENSG00000164244_5:127523460-127524108	ENSG00000164244_5:127539040-127539143	NA	Chimpanzee	9598
ENSPTRG00000017616_10-8	3	ENSPTRG00000017616_5:180119581-180119682	ENSPTRG00000017616_5:180129121-180129182	ENSG00000176783_5:179567461-179567562	ENSG00000176783_5:179577075-179577136	NA	Chimpanzee	9598
ENSPTRG00000017725_18-11	8	ENSPTRG00000017725_6:10984592-10984734	ENSPTRG00000017725_6:11003427-11003520	ENSG00000272162_6:10907542-10907684	ENSG00000153157_6:10926339-10926432	NA	Chimpanzee	9598
ENSPTRG00000017765_8-4	5	ENSPTRG00000017765_6:20877229-20877313	ENSPTRG00000017765_6:21078277-21078380	ENSG00000145996_6:20649293-20649377	ENSG00000145996_6:20846075-20846178	NA	Chimpanzee	9598
ENSPTRG00000017787_30-19	12	ENSPTRG00000017787_6:25847798-25847902	ENSPTRG00000017787_6:25892477-25892608	ENSG00000079691_6:25495111-25495215	ENSG00000079691_6:25539947-25540078	NA	Chimpanzee	9598
ENSPTRG00000017787_35-21	15	ENSPTRG00000017787_6:25862391-25862472	ENSPTRG00000017787_6:25933757-25933953	ENSG00000079691_6:25509656-25509737	ENSG00000079691_6:25581243-25581439	NA	Chimpanzee	9598
ENSPTRG00000017787_35-29	7	ENSPTRG00000017787_6:25890394-25890522	ENSPTRG00000017787_6:25933757-25933953	ENSG00000079691_6:25537855-25537983	ENSG00000079691_6:25581243-25581439	NA	Chimpanzee	9598
ENSPTRG00000017787_42-31	12	ENSPTRG00000017787_6:25903435-25903610	ENSPTRG00000017787_6:25962620-25962751	ENSG00000079691_6:25550910-25551085	ENSG00000079691_6:25610050-25610181	NA	Chimpanzee	9598
ENSPTRG00000018076_23-12	10	ENSPTRG00000018076_6:35353300-35353886	ENSPTRG00000018076_6:35419977-35420114	ENSG00000064999_6:35017473-35018059	ENSG00000064999_6:35084121-35084258	NA	Chimpanzee	9598
ENSPTRG00000018129_29-21	9	ENSPTRG00000018129_6:39234939-39235126	ENSPTRG00000018129_6:39271157-39271346	ENSG00000124721_6:38786765-38786952	ENSG00000124721_6:38815468-38815657	NA	Chimpanzee	9598
ENSPTRG00000018174_9-6	4	ENSPTRG00000018174_6:43340406-43340511	ENSPTRG00000018174_6:43345392-43345537	ENSG00000112624_6:42852092-42852197	ENSG00000112624_6:42857091-42857236	NA	Chimpanzee	9598
ENSPTRG00000018205_9-2	7	ENSPTRG00000018205_6:44089369-44089509	ENSPTRG00000018205_6:44112332-44112397	ENSG00000170734_6:43582316-43582456	ENSG00000170734_6:43605254-43605319	NA	Chimpanzee	9598
ENSPTRG00000018244_18-13	6	ENSPTRG00000018244_6:48138770-48138935	ENSPTRG00000018244_6:48155254-48155317	ENSG00000198087_6:47595861-47596026	ENSG00000198087_6:47612473-47612536	NA	Chimpanzee	9598
ENSPTRG00000018244_18-7	12	ENSPTRG00000018244_6:48116928-48117148	ENSPTRG00000018244_6:48155254-48155317	ENSG00000198087_6:47574064-47574251	ENSG00000198087_6:47612473-47612536	NA	Chimpanzee	9598
ENSPTRG00000018294_16-8	8	ENSPTRG00000018294_6:54827672-54827737	ENSPTRG00000018294_6:54922965-54923018	ENSG00000146147_6:54160367-54160432	ENSG00000146147_6:54257308-54257361	NA	Chimpanzee	9598
ENSPTRG00000018294_7-4	3	ENSPTRG00000018294_6:54787090-54787245	ENSPTRG00000018294_6:54815763-54815834	ENSG00000146147_6:54121447-54121602	ENSG00000146147_6:54149056-54149127	NA	Chimpanzee	9598
ENSPTRG00000018325_11-7	5	ENSPTRG00000018325_6:71575619-71575720	ENSPTRG00000018325_6:71619203-71619311	ENSG00000135298_6:68974763-68974864	ENSG00000135298_6:69018391-69018499	NA	Chimpanzee	9598
ENSPTRG00000018325_14-11	4	ENSPTRG00000018325_6:71619203-71619311	ENSPTRG00000018325_6:71663759-71663861	ENSG00000135298_6:69018391-69018499	ENSG00000135298_6:69062934-69063036	NA	Chimpanzee	9598
ENSPTRG00000018325_14-2	13	ENSPTRG00000018325_6:71530534-71530644	ENSPTRG00000018325_6:71663759-71663861	ENSG00000135298_6:68930559-68930669	ENSG00000135298_6:69062934-69063036	NA	Chimpanzee	9598
ENSPTRG00000018325_6-4	3	ENSPTRG00000018325_6:71543859-71544023	ENSPTRG00000018325_6:71557510-71557674	ENSG00000135298_6:68943830-68943994	ENSG00000135298_6:68956645-68956809	NA	Chimpanzee	9598
ENSPTRG00000018330_16-3	12	ENSPTRG00000018330_6:73059588-73059673	ENSPTRG00000018330_6:73146689-73146844	ENSG00000082269_6:70415291-70415376	ENSG00000082269_6:70502636-70502791	NA	Chimpanzee	9598
ENSPTRG00000018330_29-8	20	ENSPTRG00000018330_6:73119370-73119509	ENSPTRG00000018330_6:73182288-73182398	ENSG00000082269_6:70475410-70475549	ENSG00000082269_6:70538291-70538401	NA	Chimpanzee	9598
ENSPTRG00000018357_10-6	5	ENSPTRG00000018357_6:78356276-78356369	ENSPTRG00000018357_6:78375431-78375451	ENSG00000112701_6:75621532-75621625	ENSG00000112701_6:75640684-75640704	NA	Chimpanzee	9598
ENSPTRG00000018357_24-24	1	ENSPTRG00000018357_6:78437462-78437889	ENSPTRG00000018357_6:78437462-78437889	ENSG00000112701_6:75702645-75703072	ENSG00000112701_6:75702645-75703072	NA	Chimpanzee	9598
ENSPTRG00000018372_6-4	3	ENSPTRG00000018372_6:83135978-83136111	ENSPTRG00000018372_6:83139657-83139765	ENSG00000083123_6:80167678-80167811	ENSG00000083123_6:80171282-80171390	NA	Chimpanzee	9598
ENSPTRG00000018385_12-8	5	ENSPTRG00000018385_6:86998069-86998129	ENSPTRG00000018385_6:87004499-87004621	ENSG00000065615_6:83918005-83918065	ENSG00000065615_6:83924470-83924592	NA	Chimpanzee	9598
ENSPTRG00000018408_12-7	4	ENSPTRG00000018408_6:90764806-90764957	ENSPTRG00000018408_6:90768896-90769055	ENSG00000135336_6:87607673-87607824	ENSG00000135336_6:87612089-87612248	NA	Chimpanzee	9598
ENSPTRG00000018506_3-3	1	ENSPTRG00000018506_6:114774266-114774719	ENSPTRG00000018506_6:114774266-114774719	ENSG00000112394_6:111177212-111177665	ENSG00000112394_6:111177212-111177665	NA	Chimpanzee	9598
ENSPTRG00000018693_6-5	2	ENSPTRG00000018693_6:153682568-153682724	ENSPTRG00000018693_6:153683331-153683461	ENSG00000055211_6:149579834-149579990	ENSG00000055211_6:149580591-149580723	NA	Chimpanzee	9598
ENSPTRG00000018743_10-6	5	ENSPTRG00000018743_6:162749055-162749235	ENSPTRG00000018743_6:162780738-162780972	ENSG00000130338_6:158448996-158449176	ENSG00000130338_6:158481055-158481289	NA	Chimpanzee	9598
ENSPTRG00000018935_19-9	11	ENSPTRG00000018935_7:9967757-9967901	ENSPTRG00000018935_7:10028879-10029047	ENSG00000106443_7:10990703-10990847	ENSG00000106443_7:11051612-11051780	NA	Chimpanzee	9598
ENSPTRG00000018935_24-11	12	ENSPTRG00000018935_7:9999887-9999998	ENSPTRG00000018935_7:10093440-10093557	ENSG00000106443_7:11022868-11022979	ENSG00000106443_7:11110981-11111467	NA	Chimpanzee	9598
ENSPTRG00000018959_18-18	2	ENSPTRG00000018959_7:17733199-17733462	ENSPTRG00000018959_7:17733199-17733462	ENSG00000048052_7:18666213-18666476	ENSG00000048052_7:18666213-18666476	NA	Chimpanzee	9598
ENSPTRG00000018959_29-13	17	ENSPTRG00000018959_7:17696262-17696393	ENSPTRG00000018959_7:17942134-17942252	ENSG00000048052_7:18629350-18629481	ENSG00000048052_7:18874478-18874596	NA	Chimpanzee	9598
ENSPTRG00000018959_32-27	6	ENSPTRG00000018959_7:17903238-17903357	ENSPTRG00000018959_7:18045754-18045901	ENSG00000048052_7:18835467-18835586	ENSG00000048052_7:18975806-18975953	NA	Chimpanzee	9598
ENSPTRG00000018983_3-3	1	ENSPTRG00000018983_7:22323217-22323445	ENSPTRG00000018983_7:22323217-22323445	ENSG00000136243_7:23185070-23185298	ENSG00000136243_7:23185070-23185298	NA	Chimpanzee	9598
ENSPTRG00000019046_14-7	8	ENSPTRG00000019046_7:29986123-29986181	ENSPTRG00000019046_7:30016487-30016554	ENSG00000254959_7:30828679-30828737	ENSG00000106125_7:30857747-30859324	NA	Chimpanzee	9598
ENSPTRG00000019069_19-14	6	ENSPTRG00000019069_7:32503350-32503452	ENSPTRG00000019069_7:32521739-32521834	ENSG00000122507_7:33349068-33349170	ENSG00000122507_7:33367767-33367862	NA	Chimpanzee	9598
ENSPTRG00000019069_19-18	2	ENSPTRG00000019069_7:32512149-32512289	ENSPTRG00000019069_7:32521739-32521834	ENSG00000122507_7:33357855-33357995	ENSG00000122507_7:33367767-33367862	NA	Chimpanzee	9598
ENSPTRG00000019069_21-6	14	ENSPTRG00000019069_7:32411363-32411537	ENSPTRG00000019069_7:32541921-32542073	ENSG00000122507_7:33257236-33257410	ENSG00000122507_7:33387992-33388144	NA	Chimpanzee	9598
ENSPTRG00000019072_13-4	10	ENSPTRG00000019072_7:33124815-33124897	ENSPTRG00000019072_7:33246519-33246855	ENSG00000164619_7:33966479-33966561	ENSG00000164619_7:34085756-34086092	NA	Chimpanzee	9598
ENSPTRG00000019260_2-2	1	ENSPTRG00000019260_7:70535650-70535862	ENSPTRG00000019260_7:70535650-70535862	ENSG00000158321_7:69899286-69899498	ENSG00000158321_7:69899286-69899498	NA	Chimpanzee	9598
ENSPTRG00000019337_20-16	4	ENSPTRG00000019337_7:80404040-80404142	ENSPTRG00000019337_7:80413141-80413208	ENSG00000127947_7:77626705-77627675	ENSG00000127947_7:77635782-77635849	NA	Chimpanzee	9598
ENSPTRG00000019340_26-16	12	ENSPTRG00000019340_7:80702130-80702316	ENSPTRG00000019340_7:80735623-80735748	ENSG00000006576_7:77920279-77920465	ENSG00000006576_7:77953769-77953894	NA	Chimpanzee	9598
ENSPTRG00000019370_11-5	6	ENSPTRG00000019370_7:90550626-90550676	ENSPTRG00000019370_7:90638584-90638741	ENSG00000105784_7:87693908-87693958	ENSG00000105784_7:87777798-87777955	NA	Chimpanzee	9598
ENSPTRG00000019370_12-8	4	ENSPTRG00000019370_7:90595951-90596040	ENSPTRG00000019370_7:90668030-90668176	ENSG00000105784_7:87739791-87739880	ENSG00000105784_7:87807373-87807519	NA	Chimpanzee	9598
ENSPTRG00000019616_24-16	10	ENSPTRG00000019616_7:121623284-121623352	ENSPTRG00000019616_7:121709290-121709429	ENSG00000004866_7:117134124-117134192	ENSG00000004866_7:117221923-117222062	NA	Chimpanzee	9598
ENSPTRG00000019715_18-11	8	ENSPTRG00000019715_7:138743613-138743732	ENSPTRG00000019715_7:138808791-138808916	ENSG00000155530_7:134183734-134183853	ENSG00000155530_7:134248951-134249076	NA	Chimpanzee	9598
ENSPTRG00000019753_11-2	9	ENSPTRG00000019753_7:143851155-143851247	ENSPTRG00000019753_7:143888051-143888194	ENSG00000157741_7:139237005-139237097	ENSG00000157741_7:139273931-139274074	NA	Chimpanzee	9598
ENSPTRG00000019753_5-3	2	ENSPTRG00000019753_7:143866099-143866200	ENSPTRG00000019753_7:143873388-143873491	ENSG00000157741_7:139251956-139252057	ENSG00000157741_7:139259267-139259370	NA	Chimpanzee	9598
ENSPTRG00000019919_21-15	5	ENSPTRG00000019919_7:161386167-161386253	ENSPTRG00000019919_7:161407690-161407787	ENSG00000009335_7:157201721-157201807	ENSG00000009335_7:157223254-157223351	NA	Chimpanzee	9598
ENSPTRG00000020145_36-27	10	ENSPTRG00000020145_8:30706746-30706887	ENSPTRG00000020145_8:30734849-30735011	ENSG00000165392_8:31132365-31132506	ENSG00000165392_8:31157368-31157530	NA	Chimpanzee	9598
ENSPTRG00000020240_10-5	6	ENSPTRG00000020240_8:51339338-51339395	ENSPTRG00000020240_8:51425950-51426080	ENSG00000147481_8:50449668-50449725	ENSG00000147481_8:50536678-50536808	NA	Chimpanzee	9598
ENSPTRG00000020240_11-3	9	ENSPTRG00000020240_8:51291811-51291945	ENSPTRG00000020240_8:51442339-51442468	ENSG00000147481_8:50402210-50402344	ENSG00000147481_8:50553050-50553179	NA	Chimpanzee	9598
ENSPTRG00000020240_12-4	9	ENSPTRG00000020240_8:51328198-51328254	ENSPTRG00000020240_8:51480188-51480226	ENSG00000147481_8:50438543-50438599	ENSG00000147481_8:50590879-50590917	NA	Chimpanzee	9598
ENSPTRG00000020240_12-5	8	ENSPTRG00000020240_8:51339338-51339395	ENSPTRG00000020240_8:51480188-51480226	ENSG00000147481_8:50449668-50449725	ENSG00000147481_8:50590879-50590917	NA	Chimpanzee	9598
ENSPTRG00000020240_14-3	12	ENSPTRG00000020240_8:51291811-51291945	ENSPTRG00000020240_8:51547898-51547969	ENSG00000147481_8:50402210-50402344	ENSG00000147481_8:50658592-50658663	NA	Chimpanzee	9598
ENSPTRG00000020240_14-5	10	ENSPTRG00000020240_8:51339338-51339395	ENSPTRG00000020240_8:51547898-51547969	ENSG00000147481_8:50449668-50449725	ENSG00000147481_8:50658592-50658663	NA	Chimpanzee	9598
ENSPTRG00000020240_14-9	6	ENSPTRG00000020240_8:51419446-51419528	ENSPTRG00000020240_8:51547898-51547969	ENSG00000147481_8:50530177-50530259	ENSG00000147481_8:50658592-50658663	NA	Chimpanzee	9598
ENSPTRG00000020240_18-13	5	ENSPTRG00000020240_8:51546213-51546329	ENSPTRG00000020240_8:51640272-51640382	ENSG00000147481_8:50656909-50657025	ENSG00000147481_8:50752001-50752111	NA	Chimpanzee	9598
ENSPTRG00000020240_18-3	15	ENSPTRG00000020240_8:51291811-51291945	ENSPTRG00000020240_8:51640272-51640382	ENSG00000147481_8:50402210-50402344	ENSG00000147481_8:50752001-50752111	NA	Chimpanzee	9598
ENSPTRG00000020240_18-5	13	ENSPTRG00000020240_8:51339338-51339395	ENSPTRG00000020240_8:51640272-51640382	ENSG00000147481_8:50449668-50449725	ENSG00000147481_8:50752001-50752111	NA	Chimpanzee	9598
ENSPTRG00000020262_10-3	7	ENSPTRG00000020262_8:56783158-56783330	ENSPTRG00000020262_8:56802212-56802355	ENSG00000137574_8:55785719-55785891	ENSG00000137574_8:55804893-55805036	NA	Chimpanzee	9598
ENSPTRG00000020262_10-7	3	ENSPTRG00000020262_8:56793260-56793434	ENSPTRG00000020262_8:56802212-56802355	ENSG00000137574_8:55795978-55796152	ENSG00000137574_8:55804893-55805036	NA	Chimpanzee	9598
ENSPTRG00000020319_11-11	1	ENSPTRG00000020319_8:68212362-68212801	ENSPTRG00000020319_8:68212362-68212801	ENSG00000104218_8:67095293-67095732	ENSG00000104218_8:67095293-67095732	NA	Chimpanzee	9598
ENSPTRG00000020319_14-10	6	ENSPTRG00000020319_8:68210602-68210700	ENSPTRG00000020319_8:68229070-68229163	ENSG00000104218_8:67093543-67093641	ENSG00000104218_8:67111972-67112075	NA	Chimpanzee	9598
ENSPTRG00000020319_19-14	6	ENSPTRG00000020319_8:68229070-68229163	ENSPTRG00000020319_8:68235814-68235892	ENSG00000104218_8:67111972-67112075	ENSG00000104218_8:67118743-67118821	NA	Chimpanzee	9598
ENSPTRG00000020319_21-11	11	ENSPTRG00000020319_8:68212362-68212801	ENSPTRG00000020319_8:68254866-68255013	ENSG00000104218_8:67095293-67095732	ENSG00000104218_8:67137456-67137603	NA	Chimpanzee	9598
ENSPTRG00000020319_21-7	14	ENSPTRG00000020319_8:68203030-68203133	ENSPTRG00000020319_8:68254866-68255013	ENSG00000104218_8:67086007-67086110	ENSG00000104218_8:67137456-67137603	NA	Chimpanzee	9598
ENSPTRG00000020319_23-17	7	ENSPTRG00000020319_8:68232979-68233187	ENSPTRG00000020319_8:68271383-68271495	ENSG00000104218_8:67115914-67116122	ENSG00000104218_8:67154024-67154136	NA	Chimpanzee	9598
ENSPTRG00000020319_30-18	12	ENSPTRG00000020319_8:68235319-68235440	ENSPTRG00000020319_8:68292257-68292397	ENSG00000104218_8:67118248-67118369	ENSG00000104218_8:67175296-67175436	NA	Chimpanzee	9598
ENSPTRG00000020319_32-20	12	ENSPTRG00000020319_8:68249367-68249496	ENSPTRG00000020319_8:68296828-68296891	ENSG00000104218_8:67131951-67132080	ENSG00000104218_8:67179863-67179926	NA	Chimpanzee	9598
ENSPTRG00000020319_33-22	11	ENSPTRG00000020319_8:68267143-68267295	ENSPTRG00000020319_8:68307542-68307651	ENSG00000104218_8:67149783-67149935	ENSG00000104218_8:67190650-67190759	NA	Chimpanzee	9598
ENSPTRG00000020382_10-8	3	ENSPTRG00000020382_8:86604299-86604492	ENSPTRG00000020382_8:86607264-86607412	ENSG00000133739_8:85123413-85123606	ENSG00000133739_8:85126689-85126837	NA	Chimpanzee	9598
ENSPTRG00000020382_22-19	3	ENSPTRG00000020382_8:86630906-86631069	ENSPTRG00000020382_8:86634820-86634955	ENSG00000133739_8:85137464-85137627	ENSG00000133739_8:85141382-85141517	NA	Chimpanzee	9598
ENSPTRG00000020432_16-14	3	ENSPTRG00000020432_8:96523426-96523559	ENSPTRG00000020432_8:96528670-96528871	ENSG00000164941_8:94851553-94851686	ENSG00000164941_8:94856777-94856978	NA	Chimpanzee	9598
ENSPTRG00000020464_14-8	7	ENSPTRG00000020464_8:100965806-100965901	ENSPTRG00000020464_8:100987805-100987999	ENSG00000132549_8:99134632-99134727	ENSG00000132549_8:99156549-99156743	NA	Chimpanzee	9598
ENSPTRG00000020471_15-15	1	ENSPTRG00000020471_8:102102219-102102351	ENSPTRG00000020471_8:102102219-102102351	ENSG00000104450_8:100231156-100231288	ENSG00000104450_8:100231156-100231288	NA	Chimpanzee	9598
ENSPTRG00000020494_2-2	1	ENSPTRG00000020494_8:105645748-105645958	ENSPTRG00000020494_8:105645748-105645958	ENSG00000176406_8:103697086-103697296	ENSG00000176406_8:103697086-103697296	NA	Chimpanzee	9598
ENSPTRG00000020494_20-13	7	ENSPTRG00000020494_8:105876329-105876441	ENSPTRG00000020494_8:105944129-105944245	ENSG00000176406_8:103921672-103921784	ENSG00000176406_8:103989305-103989421	NA	Chimpanzee	9598
ENSPTRG00000020494_20-7	11	ENSPTRG00000020494_8:105864824-105864891	ENSPTRG00000020494_8:105944129-105944245	ENSG00000176406_8:103910134-103910201	ENSG00000176406_8:103989305-103989421	NA	Chimpanzee	9598
ENSPTRG00000020494_23-6	15	ENSPTRG00000020494_8:105839932-105840857	ENSPTRG00000020494_8:105969284-105969393	ENSG00000176406_8:103885298-103886223	ENSG00000176406_8:104014506-104014615	NA	Chimpanzee	9598
ENSPTRG00000020494_29-6	20	ENSPTRG00000020494_8:105839932-105840857	ENSPTRG00000020494_8:106101983-106102224	ENSG00000176406_8:103885298-103886223	ENSG00000176406_8:104148607-104148848	NA	Chimpanzee	9598
ENSPTRG00000020494_29-8	18	ENSPTRG00000020494_8:105865012-105865220	ENSPTRG00000020494_8:106101983-106102224	ENSG00000176406_8:103910321-103910529	ENSG00000176406_8:104148607-104148848	NA	Chimpanzee	9598
ENSPTRG00000020494_6-6	1	ENSPTRG00000020494_8:105839932-105840857	ENSPTRG00000020494_8:105839932-105840857	ENSG00000176406_8:103885298-103886223	ENSG00000176406_8:103885298-103886223	NA	Chimpanzee	9598
ENSPTRG00000020498_4-4	1	ENSPTRG00000020498_8:107511237-107511355	ENSPTRG00000020498_8:107511237-107511355	ENSG00000169946_8:105561363-105561481	ENSG00000169946_8:105561363-105561481	NA	Chimpanzee	9598
ENSPTRG00000020608_5-3	2	ENSPTRG00000020608_8:138006406-138006524	ENSPTRG00000020608_8:138033464-138033610	ENSG00000131773_8:135521237-135521355	ENSG00000131773_8:135548754-135548900	NA	Chimpanzee	9598
ENSPTRG00000020757_13-8	6	ENSPTRG00000020757_9:5777380-5777471	ENSPTRG00000020757_9:5792316-5792519	ENSG00000107036_9:5732388-5732479	ENSG00000107036_9:5747302-5747505	NA	Chimpanzee	9598
ENSPTRG00000020765_16-7	9	ENSPTRG00000020765_9:6576764-6576873	ENSPTRG00000020765_9:6601932-6602089	ENSG00000147854_9:6475391-6475500	ENSG00000147854_9:6500552-6500709	NA	Chimpanzee	9598
ENSPTRG00000020765_16-8	8	ENSPTRG00000020765_9:6579006-6579192	ENSPTRG00000020765_9:6601932-6602089	ENSG00000147854_9:6477622-6477654	ENSG00000147854_9:6500552-6500709	NA	Chimpanzee	9598
ENSPTRG00000020787_17-13	5	ENSPTRG00000020787_9:16060419-16060525	ENSPTRG00000020787_9:16068250-16068438	ENSG00000164989_9:15721769-15721875	ENSG00000164989_9:15729610-15729798	NA	Chimpanzee	9598
ENSPTRG00000020787_22-12	9	ENSPTRG00000020787_9:16033265-16033367	ENSPTRG00000020787_9:16122774-16122959	ENSG00000164989_9:15695235-15695337	ENSG00000164989_9:15784509-15784694	NA	Chimpanzee	9598
ENSPTRG00000020787_22-13	8	ENSPTRG00000020787_9:16060419-16060525	ENSPTRG00000020787_9:16122774-16122959	ENSG00000164989_9:15721769-15721875	ENSG00000164989_9:15784509-15784694	NA	Chimpanzee	9598
ENSPTRG00000020791_12-3	10	ENSPTRG00000020791_9:17594242-17594326	ENSPTRG00000020791_9:17729370-17729489	ENSG00000044459_9:17226203-17226287	ENSG00000044459_9:17342325-17342444	NA	Chimpanzee	9598
ENSPTRG00000020791_18-15	4	ENSPTRG00000020791_9:17781843-17782378	ENSPTRG00000020791_9:17803383-17803606	ENSG00000044459_9:17394534-17395069	ENSG00000044459_9:17415966-17416189	NA	Chimpanzee	9598
ENSPTRG00000020791_18-7	12	ENSPTRG00000020791_9:17681484-17681646	ENSPTRG00000020791_9:17803383-17803606	ENSG00000044459_9:17298190-17298352	ENSG00000044459_9:17415966-17416189	NA	Chimpanzee	9598
ENSPTRG00000020791_25-14	12	ENSPTRG00000020791_9:17775462-17775553	ENSPTRG00000020791_9:17866820-17866897	ENSG00000044459_9:17388162-17388253	ENSG00000044459_9:17486989-17487066	NA	Chimpanzee	9598
ENSPTRG00000020794_9-7	3	ENSPTRG00000020794_9:19030529-19030655	ENSPTRG00000020794_9:19047446-19047603	ENSG00000178031_9:18622243-18622369	ENSG00000178031_9:18639254-18639411	NA	Chimpanzee	9598
ENSPTRG00000020802_15-9	7	ENSPTRG00000020802_9:19761783-19762021	ENSPTRG00000020802_9:19782444-19782662	ENSG00000137145_9:19296008-19296246	ENSG00000137145_9:19316621-19316839	NA	Chimpanzee	9598
ENSPTRG00000020802_34-30	5	ENSPTRG00000020802_9:19823918-19824100	ENSPTRG00000020802_9:19836790-19836940	ENSG00000137145_9:19356972-19357154	ENSG00000137145_9:19369837-19369987	NA	Chimpanzee	9598
ENSPTRG00000020809_25-13	13	ENSPTRG00000020809_9:21327291-21327395	ENSPTRG00000020809_9:21424501-21424545	ENSG00000188352_9:20819796-20819900	ENSG00000188352_9:20916893-20916937	NA	Chimpanzee	9598
ENSPTRG00000020858_11-7	5	ENSPTRG00000020858_9:34041795-34041866	ENSPTRG00000020858_9:34059289-34059386	ENSG00000086102_9:33311106-33311177	ENSG00000086102_9:33328581-33328678	NA	Chimpanzee	9598
ENSPTRG00000020858_3-3	1	ENSPTRG00000020858_9:34025140-34026147	ENSPTRG00000020858_9:34025140-34026147	ENSG00000086102_9:33294420-33295427	ENSG00000086102_9:33294420-33295427	NA	Chimpanzee	9598
ENSPTRG00000020928_13-10	4	ENSPTRG00000020928_9:36933372-36933405	ENSPTRG00000020928_9:36943906-36944085	ENSG00000122707_9:36080605-36080638	ENSG00000122707_9:36091164-36091343	NA	Chimpanzee	9598
ENSPTRG00000021001_16-10	7	ENSPTRG00000021001_9:46081840-46082051	ENSPTRG00000021001_9:46104997-46105141	ENSG00000107242_9:68917548-68917759	ENSG00000107242_9:68940646-68940790	NA	Chimpanzee	9598
ENSPTRG00000021033_10-4	7	ENSPTRG00000021033_9:53244581-53244694	ENSPTRG00000021033_9:53364716-53364816	ENSG00000099139_9:75986132-75986245	ENSG00000099139_9:76107251-76107351	NA	Chimpanzee	9598
ENSPTRG00000021033_11-4	8	ENSPTRG00000021033_9:53244581-53244694	ENSPTRG00000021033_9:53390862-53390965	ENSG00000099139_9:75986132-75986245	ENSG00000099139_9:76134109-76134212	NA	Chimpanzee	9598
ENSPTRG00000021071_24-8	16	ENSPTRG00000021071_9:63255322-63255388	ENSPTRG00000021071_9:63305955-63306077	ENSG00000135040_9:85974967-85975033	ENSG00000135040_9:86018699-86018821	NA	Chimpanzee	9598
ENSPTRG00000021222_17-11	6	ENSPTRG00000021222_9:83347483-83347692	ENSPTRG00000021222_9:83368176-83368427	ENSG00000106701_9:105506399-105506608	ENSG00000106701_9:105535067-105535318	NA	Chimpanzee	9598
ENSPTRG00000021264_6-5	2	ENSPTRG00000021264_9:90368509-90368612	ENSPTRG00000021264_9:90370550-90370648	ENSG00000119471_9:112416841-112416944	ENSG00000119471_9:112418860-112418958	NA	Chimpanzee	9598
ENSPTRG00000021311_50-45	6	ENSPTRG00000021311_9:99224068-99224225	ENSPTRG00000021311_9:99230564-99230704	ENSG00000119397_9:121164943-121165100	ENSG00000119397_9:121171408-121171548	NA	Chimpanzee	9598
ENSPTRG00000021342_14-13	2	ENSPTRG00000021342_9:101069519-101069688	ENSPTRG00000021342_9:101081284-101081458	ENSG00000011454_9:122998597-122998766	ENSG00000011454_9:123010354-123010528	NA	Chimpanzee	9598
ENSPTRG00000021703_11-3	9	ENSPTRG00000021703_X:16933281-16933404	ENSPTRG00000021703_X:16988623-16988717	ENSG00000169891_X:17006221-17006344	ENSG00000169891_X:17062438-17062532	NA	Chimpanzee	9598
ENSPTRG00000021703_20-15	6	ENSPTRG00000021703_X:17000314-17000359	ENSPTRG00000021703_X:17064392-17064497	ENSG00000169891_X:17074114-17074159	ENSG00000169891_X:17138856-17138961	NA	Chimpanzee	9598
ENSPTRG00000021703_20-7	14	ENSPTRG00000021703_X:16956656-16956753	ENSPTRG00000021703_X:17064392-17064497	ENSG00000169891_X:17029526-17029623	ENSG00000169891_X:17138856-17138961	NA	Chimpanzee	9598
ENSPTRG00000021753_24-15	10	ENSPTRG00000021753_X:24915583-24915721	ENSPTRG00000021753_X:24932000-24932099	ENSG00000101868_X:24726933-24727071	ENSG00000101868_X:24743230-24743329	NA	Chimpanzee	9598
ENSPTRG00000021753_35-25	11	ENSPTRG00000021753_X:24934161-24934285	ENSPTRG00000021753_X:25032229-25032360	ENSG00000101868_X:24745418-24745542	ENSG00000101868_X:24843546-24843677	NA	Chimpanzee	9598
ENSPTRG00000021753_36-32	5	ENSPTRG00000021753_X:25010143-25010274	ENSPTRG00000021753_X:25076716-25076832	ENSG00000101868_X:24821452-24821583	ENSG00000101868_X:24888006-24888122	NA	Chimpanzee	9598
ENSPTRG00000021762_2-2	1	ENSPTRG00000021762_X:29478760-29479039	ENSPTRG00000021762_X:29478760-29479039	ENSG00000169306_X:29282938-29283217	ENSG00000169306_X:29282938-29283217	NA	Chimpanzee	9598
ENSPTRG00000021823_9-5	5	ENSPTRG00000021823_X:45151035-45151143	ENSPTRG00000021823_X:45208283-45208403	ENSG00000147050_X:44961284-44961392	ENSG00000147050_X:45020610-45020730	NA	Chimpanzee	9598
ENSPTRG00000022353_3-3	1	ENSPTRG00000022353_X:148382809-148383669	ENSPTRG00000022353_X:148382809-148383669	ENSG00000155966_X:148661908-148662768	ENSG00000155966_X:148661908-148662768	NA	Chimpanzee	9598
ENSPTRG00000022368_19-7	9	ENSPTRG00000022368_X:150427431-150427536	ENSPTRG00000022368_X:150465435-150465641	ENSG00000063601_X:150699195-150699300	ENSG00000063601_X:150737242-150737448	NA	Chimpanzee	9598
ENSPTRG00000022813_13-8	6	ENSPTRG00000022813_10:90953515-90953742	ENSPTRG00000022813_10:90957973-90958260	ENSG00000138182_10:89714955-89715182	ENSG00000138182_10:89719419-89719706	NA	Chimpanzee	9598
ENSPTRG00000022912_8-8	1	ENSPTRG00000022912_9:75187650-75187836	ENSPTRG00000022912_9:75187650-75187836	ENSG00000196116_9:97464842-97465028	ENSG00000196116_9:97464842-97465028	NA	Chimpanzee	9598
ENSPTRG00000022979_11-4	5	ENSPTRG00000022979_7:135926444-135926513	ENSPTRG00000022979_7:135962184-135962261	ENSG00000128585_7:131375424-131375493	ENSG00000128585_7:131411306-131411383	NA	Chimpanzee	9598
ENSPTRG00000023075_19-19	1	ENSPTRG00000023075_14:56181324-56181766	ENSPTRG00000023075_14:56181324-56181766	ENSG00000197555_14:71709222-71709664	ENSG00000197555_14:71709222-71709664	NA	Chimpanzee	9598
ENSPTRG00000023101_17-12	7	ENSPTRG00000023101_20:51613674-51613817	ENSPTRG00000023101_20:51632908-51633024	ENSG00000197818_20:49855438-49855581	ENSG00000197818_20:49874705-49874821	NA	Chimpanzee	9598
ENSPTRG00000023162_18-9	9	ENSPTRG00000023162_14:29033458-29033633	ENSPTRG00000023162_14:29074531-29074750	ENSG00000198718_14:45027299-45027474	ENSG00000198718_14:45068424-45068643	NA	Chimpanzee	9598
ENSPTRG00000023162_7-3	5	ENSPTRG00000023162_14:29005498-29005632	ENSPTRG00000023162_14:29018130-29018230	ENSG00000198718_14:44999363-44999497	ENSG00000198718_14:45011887-45012075	NA	Chimpanzee	9598
ENSPTRG00000023162_7-5	3	ENSPTRG00000023162_14:29012160-29012419	ENSPTRG00000023162_14:29018130-29018230	ENSG00000198718_14:45006008-45006267	ENSG00000198718_14:45011887-45012075	NA	Chimpanzee	9598
ENSPTRG00000023162_8-6	3	ENSPTRG00000023162_14:29015066-29015298	ENSPTRG00000023162_14:29031938-29032030	ENSG00000198718_14:45008913-45009145	ENSG00000198718_14:45025473-45025872	NA	Chimpanzee	9598
ENSPTRG00000023162_9-4	6	ENSPTRG00000023162_14:29010215-29010520	ENSPTRG00000023162_14:29033458-29033633	ENSG00000198718_14:45004061-45004366	ENSG00000198718_14:45027299-45027474	NA	Chimpanzee	9598
ENSPTRG00000023345_18-17	2	ENSPTRG00000023345_17:39322023-39322136	ENSPTRG00000023345_17:39322234-39322399	ENSG00000177302_17:18285407-18285520	ENSG00000177302_17:18285142-18285307	NA	Chimpanzee	9598
ENSPTRG00000023432_21-14	7	ENSPTRG00000023432_9:7160883-7161064	ENSPTRG00000023432_9:7275523-7275693	ENSG00000107077_9:7011698-7011879	ENSG00000107077_9:7127907-7128236	NA	Chimpanzee	9598
ENSPTRG00000023858_19-18	2	ENSPTRG00000023858_6:133984167-133984281	ENSPTRG00000023858_6:133985687-133985789	ENSG00000198945_6:130092745-130092859	ENSG00000198945_6:130094265-130094367	NA	Chimpanzee	9598
ENSPTRG00000023858_19-2	15	ENSPTRG00000023858_6:133913966-133914044	ENSPTRG00000023858_6:133985687-133985789	ENSG00000198945_6:130022227-130022305	ENSG00000198945_6:130094265-130094367	NA	Chimpanzee	9598
ENSPTRG00000024071_22-14	9	ENSPTRG00000024071_13:94670952-94671017	ENSPTRG00000024071_13:94768747-94768888	ENSG00000041515_13:108866177-108866242	ENSG00000041515_13:108964761-108964902	NA	Chimpanzee	9598
ENSPTRG00000024071_25-13	13	ENSPTRG00000024071_13:94660180-94660290	ENSPTRG00000024071_13:94822994-94823194	ENSG00000041515_13:108855443-108855553	ENSG00000041515_13:109019711-109019911	NA	Chimpanzee	9598
ENSPTRG00000028506_26-3	19	ENSPTRG00000028506_5:171415233-171415379	ENSPTRG00000028506_5:171786866-171787004	ENSG00000204764_5:170878097-170878243	ENSG00000204764_5:171242682-171242820	NA	Chimpanzee	9598
ENSPTRG00000029684_9-5	6	ENSPTRG00000029684_10:122350648-122350756	ENSPTRG00000029684_10:122421553-122421723	ENSG00000203805_10:120503818-120503926	ENSG00000203805_10:120575131-120575301	NA	Chimpanzee	9598
ENSPTRG00000030718_13-2	7	ENSPTRG00000030718_1:27568126-27568179	ENSPTRG00000030718_1:27626883-27627269	ENSG00000204138_1:28407410-28407463	ENSG00000204138_1:28466382-28466768	NA	Chimpanzee	9598
ENSPTRG00000030718_14-14	1	ENSPTRG00000030718_1:27634038-27634635	ENSPTRG00000030718_1:27634038-27634635	ENSG00000204138_1:28473554-28474151	ENSG00000204138_1:28473554-28474151	NA	Chimpanzee	9598
ENSPTRG00000030982_4-4	1	ENSPTRG00000030982_8:81865003-81865891	ENSPTRG00000030982_8:81865003-81865891	ENSG00000205189_8:80499494-80500382	ENSG00000205189_8:80499494-80500382	NA	Chimpanzee	9598
ENSPTRG00000033965_11-7	4	ENSPTRG00000033965_6:171567646-171567726	ENSPTRG00000033965_6:171583273-171583341	ENSG00000213066_6:167010813-167010893	ENSG00000213066_6:167026547-167026615	NA	Chimpanzee	9598
ENSPTRG00000034266_13-13	1	ENSPTRG00000034266_6:159372327-159372590	ENSPTRG00000034266_6:159372327-159372590	ENSG00000146426_6:155183237-155183500	ENSG00000146426_6:155183237-155183500	NA	Chimpanzee	9598
ENSPTRG00000034266_2-2	1	ENSPTRG00000034266_6:159326153-159326588	ENSPTRG00000034266_6:159326153-159326588	ENSG00000146426_6:155137177-155137612	ENSG00000146426_6:155137177-155137612	NA	Chimpanzee	9598
ENSPTRG00000034340_12-12	1	ENSPTRG00000034340_5:42039552-42039832	ENSPTRG00000034340_5:42039552-42039832	ENSG00000214944_5:73840480-73840760	ENSG00000214944_5:73840480-73840760	NA	Chimpanzee	9598
ENSPTRG00000034439_23-10	12	ENSPTRG00000034439_19:11375067-11375134	ENSPTRG00000034439_19:11391765-11391909	ENSG00000079805_19:10795372-10795439	ENSG00000079805_19:10808519-10812377	NA	Chimpanzee	9598
ENSPTRG00000048593_10-9	2	ENSPTRG00000048593_6:76153431-76153543	ENSPTRG00000048593_6:76153635-76153825	ENSG00000135297_6:73479732-73479844	ENSG00000135297_6:73479732-73480126	NA	Chimpanzee	9598
ENSPANG00000000263_34-4	31	ENSPANG00000000263_17:5030477-5030576	ENSPANG00000000263_17:5359071-5359178	ENSG00000132932_13:25529999-25530098	ENSG00000132932_13:25862301-25862408	NA	Baboon	9555
ENSPANG00000000345_10-9	2	ENSPANG00000000345_11:102027719-102027889	ENSPANG00000000345_11:102029019-102029173	ENSG00000185480_12:102164438-102164608	ENSG00000185480_12:102165729-102165883	NA	Baboon	9555
ENSPANG00000000618_17-2	15	ENSPANG00000000618_7:102087328-102087484	ENSPANG00000000618_7:102147909-102148027	ENSG00000198718_14:44995746-44995902	ENSG00000198718_14:45054431-45054549	NA	Baboon	9555
ENSPANG00000000618_19-3	16	ENSPANG00000000618_7:102090948-102091082	ENSPANG00000000618_7:102162818-102163037	ENSG00000198718_14:44999363-44999497	ENSG00000198718_14:45068424-45068643	NA	Baboon	9555
ENSPANG00000000618_7-4	4	ENSPANG00000000618_7:102095960-102096262	ENSPANG00000000618_7:102103948-102104048	ENSG00000198718_14:45004061-45004366	ENSG00000198718_14:45011887-45012075	NA	Baboon	9555
ENSPANG00000000618_7-5	3	ENSPANG00000000618_7:102097669-102097928	ENSPANG00000000618_7:102103948-102104048	ENSG00000198718_14:45006008-45006267	ENSG00000198718_14:45011887-45012075	NA	Baboon	9555
ENSPANG00000000664_17-17	1	ENSPANG00000000664_13:26748971-26749165	ENSPANG00000000664_13:26748971-26749165	ENSG00000243943_2:27607845-27608039	ENSG00000243943_2:27607845-27608039	NA	Baboon	9555
ENSPANG00000000664_20-17	4	ENSPANG00000000664_13:26748971-26749165	ENSPANG00000000664_13:26758889-26758987	ENSG00000243943_2:27607845-27608039	ENSG00000243943_2:27617051-27617571	NA	Baboon	9555
ENSPANG00000000816_22-3	19	ENSPANG00000000816_4:66558060-66558199	ENSPANG00000000816_4:66623015-66623125	ENSG00000082269_6:70475410-70475549	ENSG00000082269_6:70538291-70538401	NA	Baboon	9555
ENSPANG00000001068_31-19	13	ENSPANG00000001068_13:70779445-70779560	ENSPANG00000001068_13:70801698-70801871	ENSG00000135636_2:71551041-71551156	ENSG00000135636_2:71574198-71574371	NA	Baboon	9555
ENSPANG00000001079_14-3	10	ENSPANG00000001079_4:83332719-83332816	ENSPANG00000001079_4:83350199-83350262	ENSG00000135336_6:87601784-87601881	ENSG00000135336_6:87621950-87622013	NA	Baboon	9555
ENSPANG00000001095_11-2	9	ENSPANG00000001095_5:114703137-114703229	ENSPANG00000001095_5:114729654-114729800	ENSG00000145390_4:119245337-119245429	ENSG00000145390_4:119269691-119269837	NA	Baboon	9555
ENSPANG00000001095_12-8	4	ENSPANG00000001095_5:114721113-114721262	ENSPANG00000001095_5:114731254-114731992	ENSG00000145390_4:119261715-119261864	ENSG00000145390_4:119271296-119272034	NA	Baboon	9555
ENSPANG00000001116_10-3	7	ENSPANG00000001116_8:115983299-115983372	ENSPANG00000001116_8:115995323-115995392	ENSG00000172167_8:120451003-120451076	ENSG00000172167_8:120463687-120463761	NA	Baboon	9555
ENSPANG00000001229_14-5	9	ENSPANG00000001229_1:94185659-94185831	ENSPANG00000001229_1:94228407-94228623	ENSG00000117569_1:96769703-96769875	ENSG00000117569_1:96812712-96812928	NA	Baboon	9555
ENSPANG00000001239_16-8	9	ENSPANG00000001239_13:103235090-103235273	ENSPANG00000001239_13:103267576-103267694	ENSG00000153208_2:111975289-111975472	ENSG00000153208_2:112009948-112010066	NA	Baboon	9555
ENSPANG00000001373_2-2	1	ENSPANG00000001373_1:159933172-159933431	ENSPANG00000001373_1:159933172-159933431	ENSG00000118200_1:200760839-200761098	ENSG00000118200_1:200760839-200761098	NA	Baboon	9555
ENSPANG00000001990_8-4	5	ENSPANG00000001990_17:5738814-5738924	ENSPANG00000001990_17:5776935-5777066	ENSG00000132964_13:26349072-26349182	ENSG00000132964_13:26385211-26385342	NA	Baboon	9555
ENSPANG00000002592_24-19	6	ENSPANG00000002592_6:165487159-165487222	ENSPANG00000002592_6:165526446-165526528	ENSG00000204764_5:171183167-171183230	ENSG00000204764_5:171221758-171221840	NA	Baboon	9555
ENSPANG00000002592_24-20	5	ENSPANG00000002592_6:165487314-165487422	ENSPANG00000002592_6:165526446-165526528	ENSG00000204764_5:171183322-171183430	ENSG00000204764_5:171221758-171221840	NA	Baboon	9555
ENSPANG00000002592_24-9	12	ENSPANG00000002592_6:165230745-165230818	ENSPANG00000002592_6:165526446-165526528	ENSG00000204764_5:170914167-170914240	ENSG00000204764_5:171221758-171221840	NA	Baboon	9555
ENSPANG00000002592_27-25	3	ENSPANG00000002592_6:165544783-165544997	ENSPANG00000002592_6:165570825-165570991	ENSG00000204764_5:171240928-171241142	ENSG00000204764_5:171265681-171265847	NA	Baboon	9555
ENSPANG00000002926_5-5	1	ENSPANG00000002926_X:136932860-136933720	ENSPANG00000002926_X:136932860-136933720	ENSG00000155966_X:148661908-148662768	ENSG00000155966_X:148661908-148662768	NA	Baboon	9555
ENSPANG00000002940_30-16	15	ENSPANG00000002940_17:20805535-20805634	ENSPANG00000002940_17:20839324-20839432	ENSG00000102780_13:42187049-42187148	ENSG00000102780_13:42219686-42219794	NA	Baboon	9555
ENSPANG00000002940_30-2	25	ENSPANG00000002940_17:20735580-20735690	ENSPANG00000002940_17:20839324-20839432	ENSG00000102780_13:42127463-42127573	ENSG00000102780_13:42219686-42219794	NA	Baboon	9555
ENSPANG00000003767_36-26	10	ENSPANG00000003767_5:38109635-38109718	ENSPANG00000003767_5:38135158-38135281	ENSG00000157796_4:39245369-39245452	ENSG00000157796_4:39276962-39277143	NA	Baboon	9555
ENSPANG00000003801_7-2	6	ENSPANG00000003801_6:105655098-105655176	ENSPANG00000003801_6:105759625-105759699	ENSG00000152495_5:111344024-111344102	ENSG00000152495_5:111449129-111449203	NA	Baboon	9555
ENSPANG00000004044_11-4	8	ENSPANG00000004044_11:128778110-128778258	ENSPANG00000004044_11:128827266-128827315	ENSG00000151948_12:128875914-128876062	ENSG00000151948_12:128927105-128927154	NA	Baboon	9555
ENSPANG00000004044_11-6	6	ENSPANG00000004044_11:128800894-128800945	ENSPANG00000004044_11:128827266-128827315	ENSG00000151948_12:128899236-128899293	ENSG00000151948_12:128927105-128927154	NA	Baboon	9555
ENSPANG00000004044_14-4	11	ENSPANG00000004044_11:128778110-128778258	ENSPANG00000004044_11:128853978-128854076	ENSG00000151948_12:128875914-128876062	ENSG00000151948_12:128957545-128957643	NA	Baboon	9555
ENSPANG00000004044_9-4	6	ENSPANG00000004044_11:128778110-128778258	ENSPANG00000004044_11:128815485-128815541	ENSG00000151948_12:128875914-128876062	ENSG00000151948_12:128914900-128914989	NA	Baboon	9555
ENSPANG00000004180_14-10	5	ENSPANG00000004180_8:90723377-90723518	ENSPANG00000004180_8:90735879-90735989	ENSG00000164941_8:94842347-94842488	ENSG00000164941_8:94853794-94853915	NA	Baboon	9555
ENSPANG00000004180_14-13	2	ENSPANG00000004180_8:90733609-90733742	ENSPANG00000004180_8:90735879-90735989	ENSG00000164941_8:94851553-94851686	ENSG00000164941_8:94853794-94853915	NA	Baboon	9555
ENSPANG00000004180_9-3	6	ENSPANG00000004180_8:90707785-90707925	ENSPANG00000004180_8:90722558-90722658	ENSG00000164941_8:94827263-94827403	ENSG00000164941_8:94841491-94841591	NA	Baboon	9555
ENSPANG00000004180_9-4	5	ENSPANG00000004180_8:90708542-90708613	ENSPANG00000004180_8:90722558-90722658	ENSG00000164941_8:94827722-94827793	ENSG00000164941_8:94841491-94841591	NA	Baboon	9555
ENSPANG00000004270_19-19	1	ENSPANG00000004270_6:62269523-62271065	ENSPANG00000004270_6:62269523-62271065	ENSG00000112851_5:66053406-66054951	ENSG00000112851_5:66053406-66054951	NA	Baboon	9555
ENSPANG00000004318_18-13	4	ENSPANG00000004318_7:113601292-113601463	ENSPANG00000004318_7:113616987-113617077	ENSG00000070269_14:56621531-56621702	ENSG00000070269_14:56636508-56636598	NA	Baboon	9555
ENSPANG00000004378_31-11	21	ENSPANG00000004378_6:36705579-36705776	ENSPANG00000004378_6:36730508-36730561	ENSG00000164190_5:37000373-37000570	ENSG00000164190_5:37027359-37027412	NA	Baboon	9555
ENSPANG00000004420_8-5	4	ENSPANG00000004420_1:98380977-98381103	ENSPANG00000004420_1:98391088-98391223	ENSG00000162695_1:100912112-100912238	ENSG00000162695_1:100921706-100921841	NA	Baboon	9555
ENSPANG00000004460_13-6	7	ENSPANG00000004460_X:15886258-15886394	ENSPANG00000004460_X:15909244-15909395	ENSG00000008086_X:18575354-18575414	ENSG00000008086_X:18598462-18598613	NA	Baboon	9555
ENSPANG00000004473_9-9	1	ENSPANG00000004473_11:31736681-31737775	ENSPANG00000004473_11:31736681-31737775	ENSG00000151746_12:32327461-32328555	ENSG00000151746_12:32327461-32328555	NA	Baboon	9555
ENSPANG00000004871_12-12	1	ENSPANG00000004871_1:174768738-174768923	ENSPANG00000004871_1:174768738-174768923	ENSG00000157181_1:186406083-186406268	ENSG00000157181_1:186406083-186406268	NA	Baboon	9555
ENSPANG00000004887_30-21	10	ENSPANG00000004887_10:41713009-41713076	ENSPANG00000004887_10:41747129-41747261	ENSG00000182621_20:8722354-8722421	ENSG00000182621_20:8757046-8757178	NA	Baboon	9555
ENSPANG00000004887_39-32	7	ENSPANG00000004887_10:41755143-41755362	ENSPANG00000004887_10:41780194-41780280	ENSG00000182621_20:8765139-8765358	ENSG00000182621_20:8790175-8790261	NA	Baboon	9555
ENSPANG00000005013_3-3	1	ENSPANG00000005013_4:151794321-151794774	ENSPANG00000005013_4:151794321-151794774	ENSG00000112394_6:111177212-111177665	ENSG00000112394_6:111177212-111177665	NA	Baboon	9555
ENSPANG00000005238_8-3	6	ENSPANG00000005238_5:101052443-101055909	ENSPANG00000005238_5:101062113-101062321	ENSG00000168769_4:105233897-105234272	ENSG00000168769_4:105243570-105243778	NA	Baboon	9555
ENSPANG00000005405_6-5	2	ENSPANG00000005405_14:92108370-92108568	ENSPANG00000005405_14:92111934-92114067	ENSG00000110318_11:101958168-101958366	ENSG00000110318_11:101961741-101963880	NA	Baboon	9555
ENSPANG00000005488_3-3	1	ENSPANG00000005488_17:9717443-9718082	ENSPANG00000005488_17:9717443-9718082	ENSG00000132952_13:30630835-30631474	ENSG00000132952_13:30630835-30631474	NA	Baboon	9555
ENSPANG00000005533_12-10	3	ENSPANG00000005533_5:38999579-38999734	ENSPANG00000005533_5:39004883-39004968	ENSG00000078177_4:40117869-40118024	ENSG00000078177_4:40123127-40123212	NA	Baboon	9555
ENSPANG00000005608_15-14	2	ENSPANG00000005608_2:116121385-116121538	ENSPANG00000005608_2:116126393-116126643	ENSG00000173889_3:170122591-170122744	ENSG00000173889_3:170117123-170117476	NA	Baboon	9555
ENSPANG00000005682_3-3	1	ENSPANG00000005682_3:88193601-88193829	ENSPANG00000005682_3:88193601-88193829	ENSG00000136243_7:23185070-23185298	ENSG00000136243_7:23185070-23185298	NA	Baboon	9555
ENSPANG00000005748_17-8	8	ENSPANG00000005748_8:81253568-81253715	ENSPANG00000005748_8:81269424-81269561	ENSG00000133739_8:85124792-85124939	ENSG00000133739_8:85138338-85138475	NA	Baboon	9555
ENSPANG00000005748_18-15	3	ENSPANG00000005748_8:81266743-81266906	ENSPANG00000005748_8:81272490-81272625	ENSG00000133739_8:85137464-85137627	ENSG00000133739_8:85141382-85141517	NA	Baboon	9555
ENSPANG00000005750_16-12	5	ENSPANG00000005750_8:23445085-23445166	ENSPANG00000005750_8:23457065-23457190	ENSG00000147459_8:25300576-25300657	ENSG00000147459_8:25310407-25310532	NA	Baboon	9555
ENSPANG00000005909_27-23	5	ENSPANG00000005909_7:60365048-60365102	ENSPANG00000005909_7:60390953-60391020	ENSG00000170776_15:85682158-85682212	ENSG00000170776_15:85708019-85708086	NA	Baboon	9555
ENSPANG00000005909_29-23	7	ENSPANG00000005909_7:60365048-60365102	ENSPANG00000005909_7:60393420-60393486	ENSG00000170776_15:85682158-85682212	ENSG00000170776_15:85710443-85710645	NA	Baboon	9555
ENSPANG00000005929_20-15	6	ENSPANG00000005929_11:83465653-83465800	ENSPANG00000005929_11:83475872-83476011	ENSG00000177463_3:15023200-15023347	ENSG00000177463_3:15034324-15034809	NA	Baboon	9555
ENSPANG00000006148_9-3	7	ENSPANG00000006148_13:60082771-60082913	ENSPANG00000006148_13:60110080-60110292	ENSG00000162924_2:60891683-60891825	ENSG00000162924_2:60918394-60918606	NA	Baboon	9555
ENSPANG00000006161_21-7	13	ENSPANG00000006161_6:103206057-103206240	ENSPANG00000006161_6:103430732-103430855	ENSG00000151422_5:108867767-108867950	ENSG00000151422_5:109100396-109100519	NA	Baboon	9555
ENSPANG00000006224_23-16	7	ENSPANG00000006224_18:49186880-49187649	ENSPANG00000006224_18:49245074-49245187	ENSG00000091157_18:56756583-56757352	ENSG00000091157_18:56816031-56816144	NA	Baboon	9555
ENSPANG00000006224_32-23	9	ENSPANG00000006224_18:49245074-49245187	ENSPANG00000006224_18:49459019-49459123	ENSG00000091157_18:56816031-56816144	ENSG00000091157_18:57020745-57020849	NA	Baboon	9555
ENSPANG00000006371_15-7	9	ENSPANG00000006371_1:9145823-9145900	ENSPANG00000006371_1:9156870-9157081	ENSG00000054523_1:10271502-10271579	ENSG00000054523_1:10282322-10282533	NA	Baboon	9555
ENSPANG00000006371_40-36	5	ENSPANG00000006371_1:9219326-9219444	ENSPANG00000006371_1:9226507-9226591	ENSG00000054523_1:10342050-10342168	ENSG00000054523_1:10348649-10348733	NA	Baboon	9555
ENSPANG00000006376_12-7	7	ENSPANG00000006376_4:165735521-165735622	ENSPANG00000006376_4:165787879-165787971	ENSG00000112584_6:170330449-170330550	ENSG00000112584_6:170395487-170395579	NA	Baboon	9555
ENSPANG00000006450_4-3	2	ENSPANG00000006450_18:46740225-46740389	ENSPANG00000006450_18:46744780-46744932	ENSG00000101751_18:54273926-54274090	ENSG00000101751_18:54277703-54277855	NA	Baboon	9555
ENSPANG00000006451_24-15	10	ENSPANG00000006451_18:45634267-45634408	ENSPANG00000006451_18:45759584-45759616	ENSG00000187323_18:53305578-53305719	ENSG00000187323_18:53416124-53416156	NA	Baboon	9555
ENSPANG00000006451_24-21	4	ENSPANG00000006451_18:45741424-45741562	ENSPANG00000006451_18:45759584-45759616	ENSG00000187323_18:53397308-53397446	ENSG00000187323_18:53416124-53416156	NA	Baboon	9555
ENSPANG00000006451_28-15	14	ENSPANG00000006451_18:45634267-45634408	ENSPANG00000006451_18:45808467-45808583	ENSG00000187323_18:53305578-53305719	ENSG00000187323_18:53467894-53468010	NA	Baboon	9555
ENSPANG00000006451_28-26	3	ENSPANG00000006451_18:45792501-45792663	ENSPANG00000006451_18:45808467-45808583	ENSG00000187323_18:53450500-53450662	ENSG00000187323_18:53467894-53468010	NA	Baboon	9555
ENSPANG00000006648_8-8	1	ENSPANG00000006648_14:102267934-102268101	ENSPANG00000006648_14:102267934-102268101	ENSG00000197580_11:112202023-112202190	ENSG00000197580_11:112202023-112202190	NA	Baboon	9555
ENSPANG00000006734_14-14	1	ENSPANG00000006734_19:32530238-32530459	ENSPANG00000006734_19:32530238-32530459	ENSG00000105738_19:38182519-38182740	ENSG00000105738_19:38182519-38182740	NA	Baboon	9555
ENSPANG00000006734_17-14	4	ENSPANG00000006734_19:32530238-32530459	ENSPANG00000006734_19:32546633-32546776	ENSG00000105738_19:38182519-38182740	ENSG00000105738_19:38198389-38198532	NA	Baboon	9555
ENSPANG00000006734_8-8	1	ENSPANG00000006734_19:32476327-32476601	ENSPANG00000006734_19:32476327-32476601	ENSG00000105738_19:38130498-38130772	ENSG00000105738_19:38130498-38130772	NA	Baboon	9555
ENSPANG00000006894_10-9	2	ENSPANG00000006894_13:41847178-41847280	ENSPANG00000006894_13:41850721-41850820	ENSG00000057935_2:42656200-42656302	ENSG00000057935_2:42659520-42659862	NA	Baboon	9555
ENSPANG00000006894_18-12	7	ENSPANG00000006894_13:41890911-41890985	ENSPANG00000006894_13:41903799-41904021	ENSG00000057935_2:42695765-42695839	ENSG00000057935_2:42708874-42709096	NA	Baboon	9555
ENSPANG00000006931_79-58	16	ENSPANG00000006931_3:40463055-40463176	ENSPANG00000006931_3:40500034-40500251	ENSG00000196367_7:98967041-98967162	ENSG00000196367_7:99005131-99005348	NA	Baboon	9555
ENSPANG00000006963_15-11	4	ENSPANG00000006963_18:13601803-13601937	ENSPANG00000006963_18:13634659-13634792	ENSG00000141449_18:21452083-21452217	ENSG00000141449_18:21485369-21485753	NA	Baboon	9555
ENSPANG00000006996_12-10	3	ENSPANG00000006996_6:132702195-132702794	ENSPANG00000006996_6:132709362-132709563	ENSG00000120733_5:138386022-138386190	ENSG00000120733_5:138393171-138393372	NA	Baboon	9555
ENSPANG00000007027_4-4	1	ENSPANG00000007027_10:81486066-81486473	ENSPANG00000007027_10:81486066-81486473	ENSG00000196236_22:40881770-40882177	ENSG00000196236_22:40881770-40882177	NA	Baboon	9555
ENSPANG00000007027_8-4	5	ENSPANG00000007027_10:81486066-81486473	ENSPANG00000007027_10:81516387-81516472	ENSG00000196236_22:40881770-40882177	ENSG00000196236_22:40914239-40914324	NA	Baboon	9555
ENSPANG00000007040_18-4	15	ENSPANG00000007040_6:122593553-122593672	ENSPANG00000007040_6:122634404-122634515	ENSG00000064651_5:128112814-128112933	ENSG00000064651_5:128157988-128158164	NA	Baboon	9555
ENSPANG00000007055_7-3	4	ENSPANG00000007055_5:178735805-178735934	ENSPANG00000007055_5:178755282-178755370	ENSG00000164306_4:184661774-184661903	ENSG00000164306_4:184682248-184682336	NA	Baboon	9555
ENSPANG00000007131_14-8	7	ENSPANG00000007131_8:94866384-94866479	ENSPANG00000007131_8:94890890-94891084	ENSG00000132549_8:99134632-99134727	ENSG00000132549_8:99156549-99156743	NA	Baboon	9555
ENSPANG00000007133_15-12	4	ENSPANG00000007133_8:90645256-90645329	ENSPANG00000007133_8:90656453-90656573	ENSG00000156162_8:94766612-94766685	ENSG00000156162_8:94777666-94777786	NA	Baboon	9555
ENSPANG00000007133_7-2	5	ENSPANG00000007133_8:90600724-90600834	ENSPANG00000007133_8:90616357-90616502	ENSG00000156162_8:94726331-94726441	ENSG00000156162_8:94739645-94739790	NA	Baboon	9555
ENSPANG00000007133_9-2	7	ENSPANG00000007133_8:90600724-90600834	ENSPANG00000007133_8:90641561-90641695	ENSG00000156162_8:94726331-94726441	ENSG00000156162_8:94761700-94761834	NA	Baboon	9555
ENSPANG00000007248_27-20	7	ENSPANG00000007248_4:78929208-78929360	ENSPANG00000007248_4:78942470-78942604	ENSG00000083097_6:83132176-83132328	ENSG00000083097_6:83145524-83145658	NA	Baboon	9555
ENSPANG00000007248_28-8	20	ENSPANG00000007248_4:78910476-78910574	ENSPANG00000007248_4:78944184-78944239	ENSG00000083097_6:83113323-83113421	ENSG00000083097_6:83147236-83147291	NA	Baboon	9555
ENSPANG00000007392_13-6	8	ENSPANG00000007392_17:50782722-50782830	ENSPANG00000007392_17:50888920-50889022	ENSG00000083535_13:72827010-72827118	ENSG00000083535_13:72931165-72931267	NA	Baboon	9555
ENSPANG00000007392_14-10	5	ENSPANG00000007392_17:50851058-50851223	ENSPANG00000007392_17:50922062-50922192	ENSG00000083535_13:72893784-72893871	ENSG00000083535_13:72965274-72965404	NA	Baboon	9555
ENSPANG00000007565_19-3	16	ENSPANG00000007565_1:85792914-85793214	ENSPANG00000007565_1:85860453-85860629	ENSG00000065243_1:88740988-88741288	ENSG00000065243_1:88813557-88813733	NA	Baboon	9555
ENSPANG00000007565_7-4	4	ENSPANG00000007565_1:85813494-85813648	ENSPANG00000007565_1:85824560-85824773	ENSG00000065243_1:88760222-88760376	ENSG00000065243_1:88771663-88771879	NA	Baboon	9555
ENSPANG00000007585_2-2	1	ENSPANG00000007585_X:26690902-26691181	ENSPANG00000007585_X:26690902-26691181	ENSG00000169306_X:29282938-29283217	ENSG00000169306_X:29282938-29283217	NA	Baboon	9555
ENSPANG00000007604_53-28	19	ENSPANG00000007604_5:108985661-108985805	ENSPANG00000007604_5:109045073-109045364	ENSG00000145362_4:113311255-113311399	ENSG00000145362_4:113369514-113369805	NA	Baboon	9555
ENSPANG00000007638_10-6	5	ENSPANG00000007638_14:66638433-66638608	ENSPANG00000007638_14:66652463-66652739	ENSG00000158636_11:76458183-76461015	ENSG00000158636_11:76472564-76472840	NA	Baboon	9555
ENSPANG00000007638_11-6	6	ENSPANG00000007638_14:66638433-66638608	ENSPANG00000007638_14:66672542-66672796	ENSG00000158636_11:76458183-76461015	ENSG00000158636_11:76496215-76496469	NA	Baboon	9555
ENSPANG00000007638_16-6	10	ENSPANG00000007638_14:66638433-66638608	ENSPANG00000007638_14:66704100-66704298	ENSG00000158636_11:76458183-76461015	ENSG00000158636_11:76528268-76528466	NA	Baboon	9555
ENSPANG00000007640_17-6	8	ENSPANG00000007640_17:4324841-4324941	ENSPANG00000007640_17:4347691-4347859	ENSG00000132972_13:24781844-24781944	ENSG00000132972_13:24800366-24800534	NA	Baboon	9555
ENSPANG00000007640_23-5	12	ENSPANG00000007640_17:4322671-4322751	ENSPANG00000007640_17:4373408-4373528	ENSG00000132972_13:24779667-24779747	ENSG00000132972_13:24831858-24831978	NA	Baboon	9555
ENSPANG00000007640_23-6	11	ENSPANG00000007640_17:4324841-4324941	ENSPANG00000007640_17:4373408-4373528	ENSG00000132972_13:24781844-24781944	ENSG00000132972_13:24831858-24831978	NA	Baboon	9555
ENSPANG00000007682_25-10	14	ENSPANG00000007682_1:34358778-34358912	ENSPANG00000007682_1:34396899-34397000	ENSG00000126070_1:36004341-36004475	ENSG00000126070_1:36043264-36043548	NA	Baboon	9555
ENSPANG00000007701_8-6	3	ENSPANG00000007701_3:161729605-161729654	ENSPANG00000007701_3:161736151-161736322	ENSG00000105948_7:139142256-139142305	ENSG00000105948_7:139148206-139148377	NA	Baboon	9555
ENSPANG00000007747_15-10	5	ENSPANG00000007747_5:19348020-19348091	ENSPANG00000007747_5:19359091-19359229	ENSG00000145147_4:20480716-20480787	ENSG00000145147_4:20491761-20491899	NA	Baboon	9555
ENSPANG00000007747_25-23	3	ENSPANG00000007747_5:19397621-19397695	ENSPANG00000007747_5:19405324-19405467	ENSG00000145147_4:20531984-20532058	ENSG00000145147_4:20539441-20539584	NA	Baboon	9555
ENSPANG00000007747_29-14	16	ENSPANG00000007747_5:19358134-19358145	ENSPANG00000007747_5:19412264-19412332	ENSG00000145147_4:20490803-20490814	ENSG00000145147_4:20546031-20546099	NA	Baboon	9555
ENSPANG00000007747_41-34	7	ENSPANG00000007747_5:19433763-19433887	ENSPANG00000007747_5:19464461-19464591	ENSG00000145147_4:20567262-20567386	ENSG00000145147_4:20598265-20598395	NA	Baboon	9555
ENSPANG00000007911_23-19	5	ENSPANG00000007911_11:73950662-73950822	ENSPANG00000007911_11:73971049-73971126	ENSG00000067798_12:78128706-78128866	ENSG00000067798_12:78148842-78148919	NA	Baboon	9555
ENSPANG00000007911_25-19	7	ENSPANG00000007911_11:73950662-73950822	ENSPANG00000007911_11:73991506-73991617	ENSG00000067798_12:78128706-78128866	ENSG00000067798_12:78168755-78168866	NA	Baboon	9555
ENSPANG00000007911_7-5	3	ENSPANG00000007911_11:73788274-73788346	ENSPANG00000007911_11:73817398-73817466	ENSG00000067798_12:77966229-77966301	ENSG00000067798_12:77994803-77994871	NA	Baboon	9555
ENSPANG00000007987_18-3	16	ENSPANG00000007987_12:124291548-124291616	ENSPANG00000007987_12:124322681-124322757	ENSG00000204104_2:238325306-238325374	ENSG00000204104_2:238356004-238356080	NA	Baboon	9555
ENSPANG00000007987_8-3	6	ENSPANG00000007987_12:124291548-124291616	ENSPANG00000007987_12:124300141-124300216	ENSG00000204104_2:238325306-238325374	ENSG00000204104_2:238333960-238334035	NA	Baboon	9555
ENSPANG00000008050_52-51	2	ENSPANG00000008050_1:11257903-11258033	ENSPANG00000008050_1:11258252-11258427	ENSG00000048707_1:12362720-12362850	ENSG00000048707_1:12363072-12363247	NA	Baboon	9555
ENSPANG00000008071_36-30	7	ENSPANG00000008071_4:25545449-25545577	ENSPANG00000008071_4:25589762-25589958	ENSG00000079691_6:25537855-25537983	ENSG00000079691_6:25581243-25581439	NA	Baboon	9555
ENSPANG00000008071_43-22	22	ENSPANG00000008071_4:25514991-25515072	ENSPANG00000008071_4:25618325-25618456	ENSG00000079691_6:25509656-25509737	ENSG00000079691_6:25610050-25610181	NA	Baboon	9555
ENSPANG00000008108_19-6	15	ENSPANG00000008108_1:91801220-91801318	ENSPANG00000008108_1:91827070-91827133	ENSG00000117528_1:94464775-94464873	ENSG00000117528_1:94491184-94491247	NA	Baboon	9555
ENSPANG00000008271_6-4	3	ENSPANG00000008271_4:34187877-34187968	ENSPANG00000008271_4:34197135-34197275	ENSG00000065060_6:34823257-34823348	ENSG00000065060_6:34834721-34834861	NA	Baboon	9555
ENSPANG00000008341_11-6	5	ENSPANG00000008341_14:83925431-83925571	ENSPANG00000008341_14:83938024-83938127	ENSG00000166004_11:93679412-93679552	ENSG00000166004_11:93691927-93692030	NA	Baboon	9555
ENSPANG00000008341_23-13	9	ENSPANG00000008341_14:83942526-83942623	ENSPANG00000008341_14:83974516-83974693	ENSG00000166004_11:93696320-93696417	ENSG00000166004_11:93725651-93725831	NA	Baboon	9555
ENSPANG00000008622_10-6	5	ENSPANG00000008622_11:78700037-78700865	ENSPANG00000008622_11:78776890-78776968	ENSG00000179104_12:82895818-82896646	ENSG00000179104_12:82966919-82966997	NA	Baboon	9555
ENSPANG00000008622_12-5	8	ENSPANG00000008622_11:78661415-78661985	ENSPANG00000008622_11:78836907-78836988	ENSG00000179104_12:82857010-82857580	ENSG00000179104_12:83030798-83030879	NA	Baboon	9555
ENSPANG00000008622_14-5	10	ENSPANG00000008622_11:78661415-78661985	ENSPANG00000008622_11:78868438-78868501	ENSG00000179104_12:82857010-82857580	ENSG00000179104_12:83061768-83061831	NA	Baboon	9555
ENSPANG00000008622_14-8	7	ENSPANG00000008622_11:78774986-78775071	ENSPANG00000008622_11:78868438-78868501	ENSG00000179104_12:82965024-82965109	ENSG00000179104_12:83061768-83061831	NA	Baboon	9555
ENSPANG00000008622_5-5	1	ENSPANG00000008622_11:78661415-78661985	ENSPANG00000008622_11:78661415-78661985	ENSG00000179104_12:82857010-82857580	ENSG00000179104_12:82857010-82857580	NA	Baboon	9555
ENSPANG00000008635_5-3	3	ENSPANG00000008635_13:16885344-16885520	ENSPANG00000008635_13:16889176-16889249	ENSG00000178295_2:17764897-17765073	ENSG00000178295_2:17768738-17768811	NA	Baboon	9555
ENSPANG00000008715_19-13	7	ENSPANG00000008715_18:28717331-28717420	ENSPANG00000008715_18:28757793-28757843	ENSG00000134775_18:36649316-36649405	ENSG00000134775_18:36687128-36687178	NA	Baboon	9555
ENSPANG00000008715_19-18	2	ENSPANG00000008715_18:28751852-28751986	ENSPANG00000008715_18:28757793-28757843	ENSG00000134775_18:36681436-36681570	ENSG00000134775_18:36687128-36687178	NA	Baboon	9555
ENSPANG00000008732_14-13	2	ENSPANG00000008732_11:109942115-109942243	ENSPANG00000008732_11:109943797-109943886	ENSG00000122970_12:110190920-110191048	ENSG00000122970_12:110192617-110192706	NA	Baboon	9555
ENSPANG00000008751_13-9	5	ENSPANG00000008751_8:64818603-64818738	ENSPANG00000008751_8:64971781-64971874	ENSG00000165084_8:68640376-68640511	ENSG00000165084_8:68787443-68787536	NA	Baboon	9555
ENSPANG00000008850_14-3	10	ENSPANG00000008850_17:91254739-91254793	ENSPANG00000008850_17:91265349-91265422	ENSG00000130177_13:114236645-114236699	ENSG00000130177_13:114246931-114247004	NA	Baboon	9555
ENSPANG00000008949_14-11	3	ENSPANG00000008949_6:170584500-170584732	ENSPANG00000008949_6:170597674-170597828	ENSG00000170085_5:176295030-176295077	ENSG00000170085_5:176313691-176313845	NA	Baboon	9555
ENSPANG00000009322_19-14	6	ENSPANG00000009322_8:63338009-63338102	ENSPANG00000009322_8:63344779-63344857	ENSG00000104218_8:67111972-67112075	ENSG00000104218_8:67118743-67118821	NA	Baboon	9555
ENSPANG00000009322_20-14	7	ENSPANG00000009322_8:63338009-63338102	ENSPANG00000009322_8:63358213-63358342	ENSG00000104218_8:67111972-67112075	ENSG00000104218_8:67131951-67132080	NA	Baboon	9555
ENSPANG00000009322_21-13	9	ENSPANG00000009322_8:63331964-63332034	ENSPANG00000009322_8:63363981-63364128	ENSG00000104218_8:67105905-67105975	ENSG00000104218_8:67137456-67137603	NA	Baboon	9555
ENSPANG00000009322_29-18	11	ENSPANG00000009322_8:63344291-63344412	ENSPANG00000009322_8:63396298-63396437	ENSG00000104218_8:67118248-67118369	ENSG00000104218_8:67172416-67172555	NA	Baboon	9555
ENSPANG00000009322_29-22	7	ENSPANG00000009322_8:63375319-63375471	ENSPANG00000009322_8:63396298-63396437	ENSG00000104218_8:67149783-67149935	ENSG00000104218_8:67172416-67172555	NA	Baboon	9555
ENSPANG00000009322_29-9	18	ENSPANG00000009322_8:63319548-63319646	ENSPANG00000009322_8:63396298-63396437	ENSG00000104218_8:67093543-67093641	ENSG00000104218_8:67172416-67172555	NA	Baboon	9555
ENSPANG00000009322_31-13	18	ENSPANG00000009322_8:63331964-63332034	ENSPANG00000009322_8:63402009-63402055	ENSG00000104218_8:67105905-67105975	ENSG00000104218_8:67177680-67177726	NA	Baboon	9555
ENSPANG00000009322_31-20	11	ENSPANG00000009322_8:63358213-63358342	ENSPANG00000009322_8:63402009-63402055	ENSG00000104218_8:67131951-67132080	ENSG00000104218_8:67177680-67177726	NA	Baboon	9555
ENSPANG00000009322_31-23	8	ENSPANG00000009322_8:63379533-63379645	ENSPANG00000009322_8:63402009-63402055	ENSG00000104218_8:67154024-67154136	ENSG00000104218_8:67177680-67177726	NA	Baboon	9555
ENSPANG00000009350_32-27	5	ENSPANG00000009350_6:65978926-65979127	ENSPANG00000009350_6:65996595-65996687	ENSG00000145734_5:71522289-71522490	ENSG00000145734_5:71539557-71539649	NA	Baboon	9555
ENSPANG00000009350_37-27	10	ENSPANG00000009350_6:65978926-65979127	ENSPANG00000009350_6:66005746-66005812	ENSG00000145734_5:71522289-71522490	ENSG00000145734_5:71548682-71548745	NA	Baboon	9555
ENSPANG00000009399_7-2	6	ENSPANG00000009399_4:46097180-46097371	ENSPANG00000009399_4:46110472-46110564	ENSG00000153291_6:46655843-46656034	ENSG00000153291_6:46670135-46670227	NA	Baboon	9555
ENSPANG00000009449_6-6	1	ENSPANG00000009449_4:42336410-42338086	ENSPANG00000009449_4:42336410-42338086	ENSG00000112624_6:42828493-42830172	ENSG00000112624_6:42828493-42830172	NA	Baboon	9555
ENSPANG00000009449_8-4	5	ENSPANG00000009449_4:42329865-42329913	ENSPANG00000009449_4:42362390-42362490	ENSG00000112624_6:42822796-42822844	ENSG00000112624_6:42853638-42853738	NA	Baboon	9555
ENSPANG00000009511_12-4	8	ENSPANG00000009511_6:145820488-145820578	ENSPANG00000009511_6:145836053-145836222	ENSG00000123643_5:151463553-151463643	ENSG00000123643_5:151479320-151479489	NA	Baboon	9555
ENSPANG00000009863_10-3	3	ENSPANG00000009863_20:52068966-52069091	ENSPANG00000009863_20:52102834-52103006	ENSG00000102908_16:69626403-69626528	ENSG00000102908_16:69659727-69659899	NA	Baboon	9555
ENSPANG00000009986_5-2	4	ENSPANG00000009986_4:66819962-66820095	ENSPANG00000009986_4:66862666-66862746	ENSG00000112305_6:70732378-70732511	ENSG00000112305_6:70791689-70791769	NA	Baboon	9555
ENSPANG00000009989_28-8	16	ENSPANG00000009989_13:11061821-11062021	ENSPANG00000009989_13:11101097-11101183	ENSG00000134324_2:11765533-11765733	ENSG00000134324_2:11805070-11805156	NA	Baboon	9555
ENSPANG00000010105_12-4	9	ENSPANG00000010105_X:19413492-19413578	ENSPANG00000010105_X:19473762-19473863	ENSG00000102174_X:22076388-22076474	ENSG00000102174_X:22133523-22133624	NA	Baboon	9555
ENSPANG00000010228_12-5	8	ENSPANG00000010228_X:16058508-16058668	ENSPANG00000010228_X:16094682-16094834	ENSG00000086717_X:18749792-18749952	ENSG00000086717_X:18789121-18789273	NA	Baboon	9555
ENSPANG00000010228_14-4	12	ENSPANG00000010228_X:16042111-16042171	ENSPANG00000010228_X:16111962-16112104	ENSG00000086717_X:18733748-18733808	ENSG00000086717_X:18806403-18806545	NA	Baboon	9555
ENSPANG00000010228_14-8	8	ENSPANG00000010228_X:16084366-16084532	ENSPANG00000010228_X:16111962-16112104	ENSG00000086717_X:18779010-18779176	ENSG00000086717_X:18806403-18806545	NA	Baboon	9555
ENSPANG00000010229_19-14	5	ENSPANG00000010229_19:29184967-29185060	ENSPANG00000010229_19:29197942-29198078	ENSG00000126261_19:34454260-34454353	ENSG00000126261_19:34466878-34467014	NA	Baboon	9555
ENSPANG00000010276_10-6	5	ENSPANG00000010276_11:19183231-19183417	ENSPANG00000010276_11:19208403-19208429	ENSG00000139154_12:19493800-19493986	ENSG00000139154_12:19518087-19518113	NA	Baboon	9555
ENSPANG00000010459_25-25	1	ENSPANG00000010459_20:15080491-15080698	ENSPANG00000010459_20:15080491-15080698	ENSG00000103222_16:16111375-16111582	ENSG00000103222_16:16111375-16111582	NA	Baboon	9555
ENSPANG00000010484_7-4	4	ENSPANG00000010484_13:67726245-67726392	ENSPANG00000010484_13:67741287-67741642	ENSG00000169621_2:68513080-68513227	ENSG00000169621_2:68537872-68538227	NA	Baboon	9555
ENSPANG00000010484_7-6	2	ENSPANG00000010484_13:67733972-67734153	ENSPANG00000010484_13:67741287-67741642	ENSG00000169621_2:68526061-68526242	ENSG00000169621_2:68537872-68538227	NA	Baboon	9555
ENSPANG00000010678_8-4	5	ENSPANG00000010678_14:83613073-83613244	ENSPANG00000010678_14:83628050-83628292	ENSG00000165325_11:93355371-93355542	ENSG00000165325_11:93371038-93371280	NA	Baboon	9555
ENSPANG00000010729_36-4	33	ENSPANG00000010729_X:22071688-22071803	ENSPANG00000010729_X:22200277-22200451	ENSG00000101868_X:24699425-24699549	ENSG00000101868_X:24826427-24826601	NA	Baboon	9555
ENSPANG00000010729_40-35	5	ENSPANG00000010729_X:22195330-22195461	ENSPANG00000010729_X:22263453-22263569	ENSG00000101868_X:24821452-24821583	ENSG00000101868_X:24888006-24888122	NA	Baboon	9555
ENSPANG00000010729_41-4	37	ENSPANG00000010729_X:22071688-22071803	ENSPANG00000010729_X:22303807-22303903	ENSG00000101868_X:24699425-24699549	ENSG00000101868_X:24930453-24930549	NA	Baboon	9555
ENSPANG00000010747_6-4	3	ENSPANG00000010747_14:107208315-107208360	ENSPANG00000010747_14:107209512-107209571	ENSG00000167257_11:117238601-117238646	ENSG00000167257_11:117238601-117239860	NA	Baboon	9555
ENSPANG00000010978_9-7	1	ENSPANG00000010978_19:11710694-11710822	ENSPANG00000010978_19:11710694-11710822	ENSG00000179115_19:12928398-12928663	ENSG00000179115_19:12928398-12928663	NA	Baboon	9555
ENSPANG00000011007_13-12	2	ENSPANG00000011007_11:121113089-121113154	ENSPANG00000011007_11:121113239-121113388	ENSG00000089041_12:121177147-121177446	ENSG00000089041_12:121177147-121177446	NA	Baboon	9555
ENSPANG00000011134_9-8	2	ENSPANG00000011134_6:43005918-43006275	ENSPANG00000011134_6:43006378-43006600	ENSG00000172262_5:43161249-43161606	ENSG00000172262_5:43161249-43161931	NA	Baboon	9555
ENSPANG00000011214_13-8	6	ENSPANG00000011214_3:156747801-156747882	ENSPANG00000011214_3:156777804-156777910	ENSG00000155530_7:134148238-134148319	ENSG00000155530_7:134178503-134178609	NA	Baboon	9555
ENSPANG00000011214_19-10	10	ENSPANG00000011214_3:156762415-156762558	ENSPANG00000011214_3:156822176-156822315	ENSG00000155530_7:134163397-134163540	ENSG00000155530_7:134221779-134221918	NA	Baboon	9555
ENSPANG00000011214_21-10	12	ENSPANG00000011214_3:156762415-156762558	ENSPANG00000011214_3:156839459-156839584	ENSG00000155530_7:134163397-134163540	ENSG00000155530_7:134248951-134249076	NA	Baboon	9555
ENSPANG00000011214_22-15	8	ENSPANG00000011214_3:156791219-156791315	ENSPANG00000011214_3:156848730-156848878	ENSG00000155530_7:134191655-134191751	ENSG00000155530_7:134258257-134258405	NA	Baboon	9555
ENSPANG00000011300_37-29	7	ENSPANG00000011300_6:113857413-113857591	ENSPANG00000011300_6:113887666-113887807	ENSG00000172869_5:119189708-119189886	ENSG00000172869_5:119220940-119221081	NA	Baboon	9555
ENSPANG00000011409_17-5	13	ENSPANG00000011409_11:98555240-98555423	ENSPANG00000011409_11:98591732-98591893	ENSG00000120868_12:98659160-98659343	ENSG00000120868_12:98699408-98699569	NA	Baboon	9555
ENSPANG00000011409_22-5	18	ENSPANG00000011409_11:98555240-98555423	ENSPANG00000011409_11:98609860-98609985	ENSG00000120868_12:98659160-98659343	ENSG00000120868_12:98715427-98715552	NA	Baboon	9555
ENSPANG00000011409_26-13	14	ENSPANG00000011409_11:98573931-98574057	ENSPANG00000011409_11:98621689-98621832	ENSG00000120868_12:98677425-98677551	ENSG00000120868_12:98727173-98727316	NA	Baboon	9555
ENSPANG00000011409_26-5	22	ENSPANG00000011409_11:98555240-98555423	ENSPANG00000011409_11:98621689-98621832	ENSG00000120868_12:98659160-98659343	ENSG00000120868_12:98727173-98727316	NA	Baboon	9555
ENSPANG00000011476_6-4	3	ENSPANG00000011476_11:111929284-111929689	ENSPANG00000011476_11:111934094-111934170	ENSG00000135148_12:112140819-112141224	ENSG00000135148_12:112145586-112145662	NA	Baboon	9555
ENSPANG00000011477_11-7	4	ENSPANG00000011477_11:111049281-111049415	ENSPANG00000011477_11:111056158-111056206	ENSG00000111249_12:111291418-111291552	ENSG00000111249_12:111298541-111298589	NA	Baboon	9555
ENSPANG00000011979_2-2	1	ENSPANG00000011979_1:184300864-184301935	ENSPANG00000011979_1:184300864-184301935	ENSG00000116183_1:176594524-176595595	ENSG00000116183_1:176594524-176595595	NA	Baboon	9555
ENSPANG00000012020_11-4	8	ENSPANG00000012020_6:68266859-68267042	ENSPANG00000012020_6:68331910-68332190	ENSG00000214944_5:73773855-73774038	ENSG00000214944_5:73840480-73840760	NA	Baboon	9555
ENSPANG00000012072_7-5	3	ENSPANG00000012072_17:19993184-19993288	ENSPANG00000012072_17:19997410-19997544	ENSG00000172766_13:41318806-41318910	ENSG00000172766_13:41323056-41323190	NA	Baboon	9555
ENSPANG00000012072_9-4	6	ENSPANG00000012072_17:19990927-19991011	ENSPANG00000012072_17:20003678-20003797	ENSG00000172766_13:41316846-41316930	ENSG00000172766_13:41328724-41328843	NA	Baboon	9555
ENSPANG00000012252_12-10	3	ENSPANG00000012252_11:106173114-106173236	ENSPANG00000012252_11:106186093-106186227	ENSG00000013503_12:106393031-106393153	ENSG00000013503_12:106410826-106410960	NA	Baboon	9555
ENSPANG00000012252_23-11	13	ENSPANG00000012252_11:106181186-106181305	ENSPANG00000012252_11:106236798-106236940	ENSG00000013503_12:106405857-106405976	ENSG00000013503_12:106463478-106463620	NA	Baboon	9555
ENSPANG00000012374_11-2	8	ENSPANG00000012374_19:27760623-27760757	ENSPANG00000012374_19:27778615-27778819	ENSG00000076650_19:33088134-33088268	ENSG00000076650_19:33106695-33106899	NA	Baboon	9555
ENSPANG00000012374_14-13	2	ENSPANG00000012374_19:27783839-27784017	ENSPANG00000012374_19:27784602-27784729	ENSG00000076650_19:33111724-33111902	ENSG00000076650_19:33112486-33112613	NA	Baboon	9555
ENSPANG00000012374_18-2	14	ENSPANG00000012374_19:27760623-27760757	ENSPANG00000012374_19:27790698-27790805	ENSG00000076650_19:33088134-33088268	ENSG00000076650_19:33119010-33119117	NA	Baboon	9555
ENSPANG00000012479_9-6	4	ENSPANG00000012479_1:52980418-52980516	ENSPANG00000012479_1:52985992-52986111	ENSG00000162390_1:54593941-54594039	ENSG00000162390_1:54599296-54599415	NA	Baboon	9555
ENSPANG00000012804_6-2	5	ENSPANG00000012804_19:38572489-38572515	ENSPANG00000012804_19:38573496-38573575	ENSG00000104859_19:45052071-45052168	ENSG00000104859_19:45052800-45053177	NA	Baboon	9555
ENSPANG00000012989_40-34	7	ENSPANG00000012989_3:158191259-158191450	ENSPANG00000012989_3:158204217-158204343	ENSG00000155561_7:135625164-135625355	ENSG00000155561_7:135638557-135638683	NA	Baboon	9555
ENSPANG00000013121_9-4	6	ENSPANG00000013121_18:55062762-55062838	ENSPANG00000013121_18:55082599-55082656	ENSG00000141664_18:62542498-62542574	ENSG00000141664_18:62560353-62560644	NA	Baboon	9555
ENSPANG00000013321_4-4	1	ENSPANG00000013321_19:35110046-35110250	ENSPANG00000013321_19:35110046-35110250	ENSG00000086544_19:40733160-40733364	ENSG00000086544_19:40733160-40733364	NA	Baboon	9555
ENSPANG00000013351_12-5	8	ENSPANG00000013351_6:35285082-35285334	ENSPANG00000013351_6:35315513-35315681	ENSG00000152582_5:35641431-35641683	ENSG00000152582_5:35670059-35670227	NA	Baboon	9555
ENSPANG00000013610_9-5	5	ENSPANG00000013610_1:202259532-202259680	ENSPANG00000013610_1:202285338-202285488	ENSG00000143674_1:233353807-233353955	ENSG00000143674_1:233375783-233376066	NA	Baboon	9555
ENSPANG00000013755_11-5	7	ENSPANG00000013755_12:127700152-127700209	ENSPANG00000013755_12:127714590-127714755	ENSG00000180902_2:241741033-241741090	ENSG00000180902_2:241755045-241756014	NA	Baboon	9555
ENSPANG00000013803_8-5	4	ENSPANG00000013803_13:9198253-9198340	ENSPANG00000013803_13:9209218-9209371	ENSG00000115750_2:9849373-9849407	ENSG00000115750_2:9868276-9868429	NA	Baboon	9555
ENSPANG00000013806_19-9	9	ENSPANG00000013806_4:18209375-18209551	ENSPANG00000013806_4:18229641-18229793	ENSG00000165097_6:18197057-18197233	ENSG00000165097_6:18217733-18217885	NA	Baboon	9555
ENSPANG00000014020_14-3	11	ENSPANG00000014020_2:182244771-182244833	ENSPANG00000014020_2:182275726-182275832	ENSG00000152492_3:191357088-191357150	ENSG00000152492_3:191389496-191389602	NA	Baboon	9555
ENSPANG00000014043_11-9	3	ENSPANG00000014043_6:67465791-67465895	ENSPANG00000014043_6:67480353-67480449	ENSG00000157107_5:73006445-73006549	ENSG00000157107_5:73017212-73017308	NA	Baboon	9555
ENSPANG00000014043_14-3	11	ENSPANG00000014043_6:67433271-67433361	ENSPANG00000014043_6:67503529-67503553	ENSG00000157107_5:72968498-72968589	ENSG00000157107_5:73041291-73041315	NA	Baboon	9555
ENSPANG00000014043_14-6	9	ENSPANG00000014043_6:67448805-67448879	ENSPANG00000014043_6:67503529-67503553	ENSG00000157107_5:72989427-72989501	ENSG00000157107_5:73041291-73041315	NA	Baboon	9555
ENSPANG00000014043_18-9	10	ENSPANG00000014043_6:67465791-67465895	ENSPANG00000014043_6:67514094-67514269	ENSG00000157107_5:73006445-73006549	ENSG00000157107_5:73052332-73052507	NA	Baboon	9555
ENSPANG00000014043_25-10	15	ENSPANG00000014043_6:67478882-67478980	ENSPANG00000014043_6:67536616-67536745	ENSG00000157107_5:73015626-73015724	ENSG00000157107_5:73068650-73068779	NA	Baboon	9555
ENSPANG00000014043_30-24	7	ENSPANG00000014043_6:67531786-67531889	ENSPANG00000014043_6:67550664-67550728	ENSG00000157107_5:73063841-73063944	ENSG00000157107_5:73082761-73082825	NA	Baboon	9555
ENSPANG00000014045_37-36	2	ENSPANG00000014045_6:63372679-63372908	ENSPANG00000014045_6:63373504-63373626	ENSG00000069020_5:67152637-67152866	ENSG00000069020_5:67153458-67153580	NA	Baboon	9555
ENSPANG00000014233_17-17	1	ENSPANG00000014233_13:72836238-72837400	ENSPANG00000014233_13:72836238-72837400	ENSG00000116127_2:73572262-73573424	ENSG00000116127_2:73572262-73573424	NA	Baboon	9555
ENSPANG00000014233_6-2	5	ENSPANG00000014233_13:72682815-72682940	ENSPANG00000014233_13:72701766-72701866	ENSG00000116127_2:73408622-73408747	ENSG00000116127_2:73426453-73426553	NA	Baboon	9555
ENSPANG00000014368_16-12	5	ENSPANG00000014368_1:97951141-97951300	ENSPANG00000014368_1:97965684-97966017	ENSG00000079335_1:100484292-100484451	ENSG00000079335_1:100498929-100499262	NA	Baboon	9555
ENSPANG00000014368_6-3	3	ENSPANG00000014368_1:97844917-97844992	ENSPANG00000014368_1:97891377-97891456	ENSG00000079335_1:100377546-100377621	ENSG00000079335_1:100423732-100424301	NA	Baboon	9555
ENSPANG00000014543_12-4	8	ENSPANG00000014543_13:59959897-59959978	ENSPANG00000014543_13:59972175-59972247	ENSG00000115421_2:60768470-60768551	ENSG00000115421_2:60780707-60780779	NA	Baboon	9555
ENSPANG00000014543_17-4	12	ENSPANG00000014543_13:59959897-59959978	ENSPANG00000014543_13:59978985-59979094	ENSG00000115421_2:60768470-60768551	ENSG00000115421_2:60787511-60787620	NA	Baboon	9555
ENSPANG00000014997_19-7	8	ENSPANG00000014997_11:131792636-131792929	ENSPANG00000014997_11:131810878-131811055	ENSG00000183495_12:131986514-131986807	ENSG00000183495_12:132006700-132006877	NA	Baboon	9555
ENSPANG00000015060_14-10	5	ENSPANG00000015060_8:20570180-20570305	ENSPANG00000015060_8:20576111-20576208	ENSG00000120910_8:22527392-22527517	ENSG00000120910_8:22532921-22533018	NA	Baboon	9555
ENSPANG00000015108_11-10	2	ENSPANG00000015108_10:81751103-81751196	ENSPANG00000015108_10:81753130-81753267	ENSG00000100393_22:41135813-41135906	ENSG00000100393_22:41137653-41137790	NA	Baboon	9555
ENSPANG00000015136_15-15	1	ENSPANG00000015136_13:31583093-31584487	ENSPANG00000015136_13:31583093-31584487	ENSG00000115760_2:32414769-32416163	ENSG00000115760_2:32414769-32416163	NA	Baboon	9555
ENSPANG00000015208_22-21	2	ENSPANG00000015208_18:71605839-71606000	ENSPANG00000015208_18:71606703-71606795	ENSG00000166377_18:79329141-79329302	ENSG00000166377_18:79330012-79330104	NA	Baboon	9555
ENSPANG00000015208_22-7	14	ENSPANG00000015208_18:71413072-71413180	ENSPANG00000015208_18:71606703-71606795	ENSG00000166377_18:79126267-79126375	ENSG00000166377_18:79330012-79330104	NA	Baboon	9555
ENSPANG00000015230_16-7	9	ENSPANG00000015230_5:36894616-36894720	ENSPANG00000015230_5:36928143-36928282	ENSG00000065882_4:38020591-38020695	ENSG00000065882_4:38054199-38054338	NA	Baboon	9555
ENSPANG00000015286_14-8	7	ENSPANG00000015286_13:43904051-43904111	ENSPANG00000015286_13:43963619-43963750	ENSG00000143919_2:44704283-44704343	ENSG00000143919_2:44766430-44766561	NA	Baboon	9555
ENSPANG00000015300_18-12	6	ENSPANG00000015300_7:87616016-87616122	ENSPANG00000015300_7:87631042-87631214	ENSG00000092140_14:30597420-30597526	ENSG00000092140_14:30611302-30612379	NA	Baboon	9555
ENSPANG00000015300_18-14	4	ENSPANG00000015300_7:87620327-87620451	ENSPANG00000015300_7:87631042-87631214	ENSG00000092140_14:30601770-30601894	ENSG00000092140_14:30611302-30612379	NA	Baboon	9555
ENSPANG00000015300_18-8	11	ENSPANG00000015300_7:87604965-87605062	ENSPANG00000015300_7:87631042-87631214	ENSG00000092140_14:30586718-30586815	ENSG00000092140_14:30611302-30612379	NA	Baboon	9555
ENSPANG00000015334_12-11	2	ENSPANG00000015334_11:41809461-41809670	ENSPANG00000015334_11:41811185-41811352	ENSG00000189079_12:45837498-45837707	ENSG00000189079_12:45839329-45839496	NA	Baboon	9555
ENSPANG00000015334_18-8	7	ENSPANG00000015334_11:41808540-41808606	ENSPANG00000015334_11:41832678-41832826	ENSG00000189079_12:45836589-45836655	ENSG00000189079_12:45860801-45860949	NA	Baboon	9555
ENSPANG00000015369_6-2	5	ENSPANG00000015369_6:60368769-60368864	ENSPANG00000015369_6:60511781-60511906	ENSG00000164197_5:64212065-64212160	ENSG00000164197_5:64330281-64330406	NA	Baboon	9555
ENSPANG00000015481_4-4	1	ENSPANG00000015481_17:12037571-12038672	ENSPANG00000015481_17:12037571-12038672	ENSG00000133116_13:33060679-33061780	ENSG00000133116_13:33060679-33061780	NA	Baboon	9555
ENSPANG00000015485_10-3	8	ENSPANG00000015485_17:4817732-4817874	ENSPANG00000015485_17:4830760-4830934	ENSG00000139496_13:25307806-25307948	ENSG00000139496_13:25320919-25321093	NA	Baboon	9555
ENSPANG00000015567_4-2	2	ENSPANG00000015567_1:121386149-121386316	ENSPANG00000015567_1:121393928-121394078	ENSG00000143458_1:151090406-151090573	ENSG00000143458_1:151097852-151098002	NA	Baboon	9555
ENSPANG00000015571_5-5	1	ENSPANG00000015571_1:14023699-14024038	ENSPANG00000015571_1:14023699-14024038	ENSG00000116138_1:15536475-15536814	ENSG00000116138_1:15536475-15536814	NA	Baboon	9555
ENSPANG00000015572_8-4	5	ENSPANG00000015572_1:9277854-9277919	ENSPANG00000015572_1:9288159-9288348	ENSG00000142657_1:10403071-10403136	ENSG00000142657_1:10412834-10413251	NA	Baboon	9555
ENSPANG00000015580_14-8	4	ENSPANG00000015580_12:86640068-86640152	ENSPANG00000015580_12:86640925-86641095	ENSG00000013441_2:200856891-200856985	ENSG00000013441_2:200856891-200857884	NA	Baboon	9555
ENSPANG00000015764_7-3	5	ENSPANG00000015764_7:130328194-130328303	ENSPANG00000015764_7:130367580-130367720	ENSG00000119661_14:73658847-73658956	ENSG00000119661_14:73689375-73689515	NA	Baboon	9555
ENSPANG00000016021_15-5	9	ENSPANG00000016021_12:117182920-117183090	ENSPANG00000016021_12:117226861-117226953	ENSG00000135931_2:231214831-231215001	ENSG00000135931_2:231262306-231262398	NA	Baboon	9555
ENSPANG00000016021_19-5	13	ENSPANG00000016021_12:117182920-117183090	ENSPANG00000016021_12:117244379-117244455	ENSG00000135931_2:231214831-231215001	ENSG00000135931_2:231278382-231278458	NA	Baboon	9555
ENSPANG00000016021_22-18	5	ENSPANG00000016021_12:117242647-117242786	ENSPANG00000016021_12:117265431-117265486	ENSG00000135931_2:231276636-231276775	ENSG00000135931_2:231293820-231296253	NA	Baboon	9555
ENSPANG00000016021_22-5	16	ENSPANG00000016021_12:117182920-117183090	ENSPANG00000016021_12:117265431-117265486	ENSG00000135931_2:231214831-231215001	ENSG00000135931_2:231293820-231296253	NA	Baboon	9555
ENSPANG00000016133_10-3	8	ENSPANG00000016133_11:108899579-108899717	ENSPANG00000016133_11:108911987-108912157	ENSG00000076555_12:109167896-109168034	ENSG00000076555_12:109179917-109180087	NA	Baboon	9555
ENSPANG00000016133_26-24	3	ENSPANG00000016133_11:108957805-108957918	ENSPANG00000016133_11:108958096-108958209	ENSG00000076555_12:109222507-109222620	ENSG00000076555_12:109222799-109222912	NA	Baboon	9555
ENSPANG00000016133_8-3	6	ENSPANG00000016133_11:108899579-108899717	ENSPANG00000016133_11:108907882-108907992	ENSG00000076555_12:109167896-109168034	ENSG00000076555_12:109176153-109176263	NA	Baboon	9555
ENSPANG00000016160_6-3	4	ENSPANG00000016160_7:47326005-47326084	ENSPANG00000016160_7:47335437-47335509	ENSG00000140463_15:72709700-72709779	ENSG00000140463_15:72716778-72716850	NA	Baboon	9555
ENSPANG00000016198_16-9	7	ENSPANG00000016198_11:2588375-2588478	ENSPANG00000016198_11:2639190-2639216	ENSG00000151067_12:2504436-2504539	ENSG00000151067_12:2556951-2556977	NA	Baboon	9555
ENSPANG00000016198_8-5	4	ENSPANG00000016198_11:2530242-2530381	ENSPANG00000016198_11:2577416-2577612	ENSG00000151067_12:2448976-2449115	ENSG00000151067_12:2493190-2493386	NA	Baboon	9555
ENSPANG00000016308_10-2	8	ENSPANG00000016308_12:57189304-57189407	ENSPANG00000016308_12:57228130-57228239	ENSG00000115827_2:171435083-171435186	ENSG00000115827_2:171473866-171473975	NA	Baboon	9555
ENSPANG00000016308_8-2	7	ENSPANG00000016308_12:57189304-57189407	ENSPANG00000016308_12:57212148-57212253	ENSG00000115827_2:171435083-171435186	ENSG00000115827_2:171458372-171458477	NA	Baboon	9555
ENSPANG00000016309_11-2	9	ENSPANG00000016309_3:161829452-161829544	ENSPANG00000016309_3:161867091-161867234	ENSG00000157741_7:139237005-139237097	ENSG00000157741_7:139273931-139274074	NA	Baboon	9555
ENSPANG00000016368_18-4	9	ENSPANG00000016368_7:44060173-44060278	ENSPANG00000016368_7:44075372-44075530	ENSG00000137807_15:69421647-69421752	ENSG00000137807_15:69436564-69436722	NA	Baboon	9555
ENSPANG00000016592_24-8	15	ENSPANG00000016592_7:42170078-42170142	ENSPANG00000016592_7:42317392-42317424	ENSG00000137764_15:67600685-67600749	ENSG00000137764_15:67748368-67748601	NA	Baboon	9555
ENSPANG00000016592_26-8	17	ENSPANG00000016592_7:42170078-42170142	ENSPANG00000016592_7:42341850-42341895	ENSG00000137764_15:67600685-67600749	ENSG00000137764_15:67772707-67772752	NA	Baboon	9555
ENSPANG00000016676_13-7	7	ENSPANG00000016676_1:60076605-60076823	ENSPANG00000016676_1:60104275-60104331	ENSG00000132849_1:61787754-61787972	ENSG00000132849_1:61808474-61808530	NA	Baboon	9555
ENSPANG00000016676_28-17	10	ENSPANG00000016676_1:60150554-60150763	ENSPANG00000016676_1:60218440-60218539	ENSG00000132849_1:61856030-61856239	ENSG00000132849_1:61927730-61927829	NA	Baboon	9555
ENSPANG00000016676_32-22	8	ENSPANG00000016676_1:60191821-60191892	ENSPANG00000016676_1:60303537-60303628	ENSG00000132849_1:61899583-61899654	ENSG00000132849_1:62017856-62017947	NA	Baboon	9555
ENSPANG00000016676_33-15	15	ENSPANG00000016676_1:60122512-60122673	ENSPANG00000016676_1:60323909-60323981	ENSG00000132849_1:61827422-61827583	ENSG00000132849_1:62037977-62038049	NA	Baboon	9555
ENSPANG00000016676_34-10	21	ENSPANG00000016676_1:60087182-60087323	ENSPANG00000016676_1:60337752-60337844	ENSG00000132849_1:61797287-61797428	ENSG00000132849_1:62050966-62051058	NA	Baboon	9555
ENSPANG00000016676_34-15	16	ENSPANG00000016676_1:60122512-60122673	ENSPANG00000016676_1:60337752-60337844	ENSG00000132849_1:61827422-61827583	ENSG00000132849_1:62050966-62051058	NA	Baboon	9555
ENSPANG00000016676_34-22	10	ENSPANG00000016676_1:60191821-60191892	ENSPANG00000016676_1:60337752-60337844	ENSG00000132849_1:61899583-61899654	ENSG00000132849_1:62050966-62051058	NA	Baboon	9555
ENSPANG00000016676_36-22	12	ENSPANG00000016676_1:60191821-60191892	ENSPANG00000016676_1:60371074-60371207	ENSG00000132849_1:61899583-61899654	ENSG00000132849_1:62084515-62084648	NA	Baboon	9555
ENSPANG00000016834_12-8	5	ENSPANG00000016834_20:30793237-30793378	ENSPANG00000016834_20:30852469-30852611	ENSG00000102910_16:48277338-48277479	ENSG00000102910_16:48334216-48334358	NA	Baboon	9555
ENSPANG00000016862_9-3	7	ENSPANG00000016862_11:3632315-3632500	ENSPANG00000016862_11:3676839-3676989	ENSG00000111218_12:3540606-3540791	ENSG00000111218_12:3583058-3583208	NA	Baboon	9555
ENSPANG00000016879_29-27	3	ENSPANG00000016879_3:43306054-43306356	ENSPANG00000016879_3:43317235-43317499	ENSG00000257923_7:102227367-102227669	ENSG00000257923_7:102239320-102239584	NA	Baboon	9555
ENSPANG00000016896_5-5	1	ENSPANG00000016896_1:110880167-110880341	ENSPANG00000016896_1:110880167-110880341	ENSG00000081026_1:113590484-113590658	ENSG00000081026_1:113590484-113590658	NA	Baboon	9555
ENSPANG00000016896_9-3	7	ENSPANG00000016896_1:110869769-110869888	ENSPANG00000016896_1:110910257-110910445	ENSG00000081026_1:113580542-113581102	ENSG00000081026_1:113622806-113622994	NA	Baboon	9555
ENSPANG00000017052_9-8	2	ENSPANG00000017052_17:27710268-27710437	ENSPANG00000017052_17:27712751-27712940	ENSG00000102543_13:49278350-49278519	ENSG00000102543_13:49280509-49280698	NA	Baboon	9555
ENSPANG00000017058_10-9	2	ENSPANG00000017058_8:46739950-46740080	ENSPANG00000017058_8:46762211-46762340	ENSG00000147481_8:50536678-50536808	ENSG00000147481_8:50553050-50553179	NA	Baboon	9555
ENSPANG00000017058_11-4	8	ENSPANG00000017058_8:46663300-46663357	ENSPANG00000017058_8:46800415-46800453	ENSG00000147481_8:50449668-50449725	ENSG00000147481_8:50590879-50590917	NA	Baboon	9555
ENSPANG00000017058_15-12	4	ENSPANG00000017058_8:46863880-46863996	ENSPANG00000017058_8:46967375-46967485	ENSG00000147481_8:50656909-50657025	ENSG00000147481_8:50752001-50752111	NA	Baboon	9555
ENSPANG00000017058_9-4	6	ENSPANG00000017058_8:46663300-46663357	ENSPANG00000017058_8:46739950-46740080	ENSG00000147481_8:50449668-50449725	ENSG00000147481_8:50536678-50536808	NA	Baboon	9555
ENSPANG00000017194_6-3	4	ENSPANG00000017194_7:33383197-33383323	ENSPANG00000017194_7:33398268-33398587	ENSG00000157450_15:59052305-59052431	ENSG00000157450_15:59066764-59067083	NA	Baboon	9555
ENSPANG00000017315_17-13	5	ENSPANG00000017315_12:91133600-91133770	ENSPANG00000017315_12:91203156-91203200	ENSG00000116117_2:205172211-205172381	ENSG00000116117_2:205245778-205245822	NA	Baboon	9555
ENSPANG00000017315_24-24	1	ENSPANG00000017315_12:91401433-91401735	ENSPANG00000017315_12:91401433-91401735	ENSG00000116117_2:205440370-205440672	ENSG00000116117_2:205440370-205440672	NA	Baboon	9555
ENSPANG00000017323_15-4	12	ENSPANG00000017323_13:60286139-60286377	ENSPANG00000017323_13:60324568-60324659	ENSG00000162929_2:61076920-61077158	ENSG00000274769_2:61115787-61116070	NA	Baboon	9555
ENSPANG00000017372_10-7	4	ENSPANG00000017372_X:21897124-21897200	ENSPANG00000017372_X:21902514-21902627	ENSG00000067992_X:24526198-24526274	ENSG00000067992_X:24531657-24531770	NA	Baboon	9555
ENSPANG00000017514_10-2	9	ENSPANG00000017514_7:106706964-106707034	ENSPANG00000017514_7:106733415-106733487	ENSG00000197776_14:49709159-49709229	ENSG00000197776_14:49734589-49734661	NA	Baboon	9555
ENSPANG00000017549_20-3	17	ENSPANG00000017549_7:25267159-25267230	ENSPANG00000017549_7:25319788-25319902	ENSG00000081014_15:50912078-50912149	ENSG00000081014_15:50968263-50968377	NA	Baboon	9555
ENSPANG00000017549_21-12	10	ENSPANG00000017549_7:25293516-25293638	ENSPANG00000017549_7:25335918-25336041	ENSG00000081014_15:50941442-50941564	ENSG00000081014_15:50984022-50984145	NA	Baboon	9555
ENSPANG00000017549_21-14	7	ENSPANG00000017549_7:25300114-25300241	ENSPANG00000017549_7:25335918-25336041	ENSG00000081014_15:50948020-50948159	ENSG00000081014_15:50984022-50984145	NA	Baboon	9555
ENSPANG00000017627_12-5	7	ENSPANG00000017627_7:24825707-24825869	ENSPANG00000017627_7:24852255-24852341	ENSG00000138592_15:50459000-50459162	ENSG00000138592_15:50484275-50484361	NA	Baboon	9555
ENSPANG00000017627_7-5	3	ENSPANG00000017627_7:24825707-24825869	ENSPANG00000017627_7:24831675-24831819	ENSG00000138592_15:50459000-50459162	ENSG00000138592_15:50465047-50465191	NA	Baboon	9555
ENSPANG00000017812_11-5	6	ENSPANG00000017812_12:102361361-102361547	ENSPANG00000017812_12:102392232-102392302	ENSG00000138375_2:216428596-216428779	ENSG00000138375_2:216464597-216464667	NA	Baboon	9555
ENSPANG00000017841_10-7	4	ENSPANG00000017841_12:123666999-123667016	ENSPANG00000017841_12:123673807-123673857	ENSG00000124831_2:237714259-237714276	ENSG00000124831_2:237720772-237720822	NA	Baboon	9555
ENSPANG00000017860_5-5	1	ENSPANG00000017860_20:51720419-51720615	ENSPANG00000017860_20:51720419-51720615	ENSG00000168807_16:69284048-69284244	ENSG00000168807_16:69284048-69284244	NA	Baboon	9555
ENSPANG00000018049_11-6	6	ENSPANG00000018049_7:159615697-159615858	ENSPANG00000018049_7:159630327-159630384	ENSG00000089902_14:102707351-102707512	ENSG00000089902_14:102721320-102721377	NA	Baboon	9555
ENSPANG00000018163_11-11	1	ENSPANG00000018163_1:15237629-15237865	ENSPANG00000018163_1:15237629-15237865	ENSG00000058453_1:16936637-16936873	ENSG00000058453_1:16936637-16936873	NA	Baboon	9555
ENSPANG00000018309_4-4	1	ENSPANG00000018309_2:14229926-14230175	ENSPANG00000018309_2:14229926-14230175	ENSG00000169379_3:94003659-94003908	ENSG00000169379_3:94003659-94003908	NA	Baboon	9555
ENSPANG00000018415_15-15	1	ENSPANG00000018415_11:111642465-111642652	ENSPANG00000018415_11:111642465-111642652	ENSG00000089022_12:111883581-111883768	ENSG00000089022_12:111883581-111883768	NA	Baboon	9555
ENSPANG00000018425_11-6	6	ENSPANG00000018425_12:19443329-19443400	ENSPANG00000018425_12:19470280-19470413	ENSG00000152127_2:134336217-134336288	ENSG00000152127_2:134362275-134362408	NA	Baboon	9555
ENSPANG00000018513_14-10	5	ENSPANG00000018513_7:17823167-17823326	ENSPANG00000018513_7:17844050-17844168	ENSG00000137842_15:43154672-43154831	ENSG00000137842_15:43180661-43181299	NA	Baboon	9555
ENSPANG00000018513_14-3	12	ENSPANG00000018513_7:17803278-17803415	ENSPANG00000018513_7:17844050-17844168	ENSG00000137842_15:43135512-43135649	ENSG00000137842_15:43180661-43181299	NA	Baboon	9555
ENSPANG00000018513_14-9	6	ENSPANG00000018513_7:17819948-17820103	ENSPANG00000018513_7:17844050-17844168	ENSG00000137842_15:43151790-43151945	ENSG00000137842_15:43180661-43181299	NA	Baboon	9555
ENSPANG00000018594_29-8	22	ENSPANG00000018594_8:29307383-29307812	ENSPANG00000018594_8:29372508-29372620	ENSG00000165392_8:31080867-31081296	ENSG00000165392_8:31147364-31147476	NA	Baboon	9555
ENSPANG00000018663_16-9	8	ENSPANG00000018663_7:115419757-115419910	ENSPANG00000018663_7:115432194-115432368	ENSG00000100578_14:58448340-58448493	ENSG00000100578_14:58460986-58461160	NA	Baboon	9555
ENSPANG00000018663_17-9	9	ENSPANG00000018663_7:115419757-115419910	ENSPANG00000018663_7:115437039-115437233	ENSG00000100578_14:58448340-58448493	ENSG00000100578_14:58465835-58466029	NA	Baboon	9555
ENSPANG00000018663_28-18	11	ENSPANG00000018663_7:115438938-115439125	ENSPANG00000018663_7:115461741-115461817	ENSG00000100578_14:58467735-58467922	ENSG00000100578_14:58490164-58490240	NA	Baboon	9555
ENSPANG00000018663_32-24	9	ENSPANG00000018663_7:115458586-115458745	ENSPANG00000018663_7:115483520-115483625	ENSG00000100578_14:58487007-58487166	ENSG00000100578_14:58512522-58512627	NA	Baboon	9555
ENSPANG00000018698_2-2	1	ENSPANG00000018698_20:50518970-50520104	ENSPANG00000018698_20:50518970-50520104	ENSG00000072736_16:68121987-68123121	ENSG00000072736_16:68121987-68123121	NA	Baboon	9555
ENSPANG00000018698_9-9	1	ENSPANG00000018698_20:50590869-50591876	ENSPANG00000018698_20:50590869-50591876	ENSG00000072736_16:68190768-68191775	ENSG00000072736_16:68190768-68191775	NA	Baboon	9555
ENSPANG00000018771_17-17	1	ENSPANG00000018771_20:25458694-25459573	ENSPANG00000018771_20:25458694-25459573	ENSG00000047578_16:27740041-27740920	ENSG00000047578_16:27740041-27740920	NA	Baboon	9555
ENSPANG00000018771_18-18	1	ENSPANG00000018771_20:25468305-25469027	ENSPANG00000018771_20:25468305-25469027	ENSG00000047578_16:27749584-27750306	ENSG00000047578_16:27749584-27750306	NA	Baboon	9555
ENSPANG00000018795_9-5	4	ENSPANG00000018795_16:74252679-74252825	ENSPANG00000018795_16:74267924-74268133	ENSG00000141568_17:82571724-82571870	ENSG00000141568_17:82587063-82587272	NA	Baboon	9555
ENSPANG00000018801_12-2	9	ENSPANG00000018801_7:16357546-16358494	ENSPANG00000018801_7:16394992-16395509	ENSG00000174197_15:41696075-41697023	ENSG00000174197_15:41736181-41736698	NA	Baboon	9555
ENSPANG00000018801_4-3	2	ENSPANG00000018801_7:16360353-16360431	ENSPANG00000018801_7:16360550-16360645	ENSG00000174197_15:41698863-41698941	ENSG00000174197_15:41699064-41699159	NA	Baboon	9555
ENSPANG00000018888_23-21	3	ENSPANG00000018888_5:105271502-105271612	ENSPANG00000018888_5:105275357-105275494	ENSG00000138802_4:109527322-109527432	ENSG00000138802_4:109531385-109531522	NA	Baboon	9555
ENSPANG00000018962_14-7	8	ENSPANG00000018962_14:109248641-109248728	ENSPANG00000018962_14:109268174-109268271	ENSG00000110395_11:119277757-119277844	ENSG00000110395_11:119297384-119297481	NA	Baboon	9555
ENSPANG00000018962_9-6	4	ENSPANG00000018962_14:109246608-109246745	ENSPANG00000018962_14:109249418-109249621	ENSG00000110395_11:119275997-119276134	ENSG00000110395_11:119278510-119278713	NA	Baboon	9555
ENSPANG00000019137_10-10	1	ENSPANG00000019137_1:120722511-120722686	ENSPANG00000019137_1:120722511-120722686	ENSG00000163125_1:150446226-150446401	ENSG00000163125_1:150446226-150446401	NA	Baboon	9555
ENSPANG00000019137_12-12	1	ENSPANG00000019137_1:120736833-120737090	ENSPANG00000019137_1:120736833-120737090	ENSG00000163125_1:150460060-150460317	ENSG00000163125_1:150460060-150460317	NA	Baboon	9555
ENSPANG00000019170_11-6	6	ENSPANG00000019170_6:173732813-173732874	ENSPANG00000019170_6:173748823-173748990	ENSG00000176783_5:179577075-179577136	ENSG00000176783_5:179593478-179593645	NA	Baboon	9555
ENSPANG00000019174_17-17	1	ENSPANG00000019174_14:98125374-98125545	ENSPANG00000019174_14:98125374-98125545	ENSG00000149311_11:108267171-108267342	ENSG00000149311_11:108267171-108267342	NA	Baboon	9555
ENSPANG00000019174_18-9	8	ENSPANG00000019174_14:98112767-98112936	ENSPANG00000019174_14:98126632-98126831	ENSG00000149311_11:108248933-108249102	ENSG00000149311_11:108268410-108268609	NA	Baboon	9555
ENSPANG00000019174_54-19	31	ENSPANG00000019174_14:98129285-98129367	ENSPANG00000019174_14:98189734-98189892	ENSG00000149311_11:108271064-108271146	ENSG00000149311_11:108331879-108332037	NA	Baboon	9555
ENSPANG00000019174_59-16	39	ENSPANG00000019174_14:98123182-98123271	ENSPANG00000019174_14:98200913-98201062	ENSG00000149311_11:108258986-108259075	ENSG00000149311_11:108343222-108343371	NA	Baboon	9555
ENSPANG00000019174_59-19	36	ENSPANG00000019174_14:98129285-98129367	ENSPANG00000019174_14:98200913-98201062	ENSG00000149311_11:108271064-108271146	ENSG00000149311_11:108343222-108343371	NA	Baboon	9555
ENSPANG00000019225_10-3	8	ENSPANG00000019225_4:71777771-71777844	ENSPANG00000019225_4:71797968-71798148	ENSG00000196586_6:75828540-75828613	ENSG00000196586_6:75848351-75848531	NA	Baboon	9555
ENSPANG00000019238_7-6	2	ENSPANG00000019238_10:51208173-51208589	ENSPANG00000019238_10:51208727-51209295	ENSG00000149474_20:18161820-18162239	ENSG00000149474_20:18162377-18162945	NA	Baboon	9555
ENSPANG00000019286_12-4	9	ENSPANG00000019286_X:68756744-68756950	ENSPANG00000019286_X:68778776-68778930	ENSG00000165240_X:77998478-77998684	ENSG00000165240_X:78020244-78020398	NA	Baboon	9555
ENSPANG00000019286_13-2	12	ENSPANG00000019286_X:68746238-68746727	ENSPANG00000019286_X:68779467-68779601	ENSG00000165240_X:77988242-77988731	ENSG00000165240_X:78020945-78021079	NA	Baboon	9555
ENSPANG00000019286_19-4	15	ENSPANG00000019286_X:68756744-68756950	ENSPANG00000019286_X:68799215-68799357	ENSG00000165240_X:77998478-77998684	ENSG00000165240_X:78040591-78040733	NA	Baboon	9555
ENSPANG00000019286_4-2	3	ENSPANG00000019286_X:68746238-68746727	ENSPANG00000019286_X:68756744-68756950	ENSG00000165240_X:77988242-77988731	ENSG00000165240_X:77998478-77998684	NA	Baboon	9555
ENSPANG00000019538_6-2	5	ENSPANG00000019538_5:144856359-144856693	ENSPANG00000019538_5:144959719-144959813	ENSG00000170390_4:150102478-150102812	ENSG00000170390_4:150203795-150203889	NA	Baboon	9555
ENSPANG00000019544_20-10	11	ENSPANG00000019544_13:42882583-42882658	ENSPANG00000019544_13:42907865-42907977	ENSG00000152527_2:43703981-43704056	ENSG00000152527_2:43731490-43731602	NA	Baboon	9555
ENSPANG00000019544_20-9	12	ENSPANG00000019544_13:42878243-42879204	ENSPANG00000019544_13:42907865-42907977	ENSG00000152527_2:43699647-43700608	ENSG00000152527_2:43731490-43731602	NA	Baboon	9555
ENSPANG00000019544_27-10	18	ENSPANG00000019544_13:42882583-42882658	ENSPANG00000019544_13:42922197-42922294	ENSG00000152527_2:43703981-43704056	ENSG00000152527_2:43745866-43745963	NA	Baboon	9555
ENSPANG00000019544_27-9	19	ENSPANG00000019544_13:42878243-42879204	ENSPANG00000019544_13:42922197-42922294	ENSG00000152527_2:43699647-43700608	ENSG00000152527_2:43745866-43745963	NA	Baboon	9555
ENSPANG00000019544_28-10	19	ENSPANG00000019544_13:42882583-42882658	ENSPANG00000019544_13:42930276-42930417	ENSG00000152527_2:43703981-43704056	ENSG00000152527_2:43753619-43753760	NA	Baboon	9555
ENSPANG00000019545_5-3	3	ENSPANG00000019545_13:31803749-31803878	ENSPANG00000019545_13:31817769-31817871	ENSG00000018699_2:32633876-32634005	ENSG00000018699_2:32650131-32650233	NA	Baboon	9555
ENSPANG00000019571_12-6	7	ENSPANG00000019571_5:25522472-25522546	ENSPANG00000019571_5:25552392-25552504	ENSG00000109680_4:26637211-26637285	ENSG00000109680_4:26673776-26673888	NA	Baboon	9555
ENSPANG00000019571_14-10	5	ENSPANG00000019571_5:25544729-25544801	ENSPANG00000019571_5:25572362-25572424	ENSG00000109680_4:26666333-26666405	ENSG00000109680_4:26688345-26688407	NA	Baboon	9555
ENSPANG00000019571_14-11	4	ENSPANG00000019571_5:25550418-25550456	ENSPANG00000019571_5:25572362-25572424	ENSG00000109680_4:26672149-26672187	ENSG00000109680_4:26688345-26688407	NA	Baboon	9555
ENSPANG00000019571_16-10	7	ENSPANG00000019571_5:25544729-25544801	ENSPANG00000019571_5:25597889-25597933	ENSG00000109680_4:26666333-26666405	ENSG00000109680_4:26720081-26720125	NA	Baboon	9555
ENSPANG00000019571_17-10	8	ENSPANG00000019571_5:25544729-25544801	ENSPANG00000019571_5:25612769-25612801	ENSG00000109680_4:26666333-26666405	ENSG00000109680_4:26735455-26735487	NA	Baboon	9555
ENSPANG00000019571_18-11	8	ENSPANG00000019571_5:25550418-25550456	ENSPANG00000019571_5:25616584-25616693	ENSG00000109680_4:26672149-26672187	ENSG00000109680_4:26739864-26739973	NA	Baboon	9555
ENSPANG00000019595_6-5	2	ENSPANG00000019595_20:17986893-17986945	ENSPANG00000019595_20:17987080-17987157	ENSG00000174628_16:19763848-19763900	ENSG00000174628_16:19763848-19764112	NA	Baboon	9555
ENSPANG00000019598_9-6	3	ENSPANG00000019598_16:72413720-72413806	ENSPANG00000019598_16:72435482-72435657	ENSG00000141564_17:80730560-80730706	ENSG00000141564_17:80754010-80754185	NA	Baboon	9555
ENSPANG00000019620_8-6	3	ENSPANG00000019620_7:11274289-11274368	ENSPANG00000019620_7:11279949-11280016	ENSG00000186073_15:36691685-36691764	ENSG00000186073_15:36697323-36697390	NA	Baboon	9555
ENSPANG00000019708_10-2	4	ENSPANG00000019708_11:8165611-8165957	ENSPANG00000019708_11:8177322-8177420	ENSG00000065970_12:8039819-8040165	ENSG00000065970_12:8050522-8050620	NA	Baboon	9555
ENSPANG00000019718_10-9	3	ENSPANG00000019718_5:160260492-160260616	ENSPANG00000019718_5:160271660-160271775	ENSG00000038295_4:166014436-166014560	ENSG00000038295_4:166025316-166025431	NA	Baboon	9555
ENSPANG00000019718_16-10	4	ENSPANG00000019718_5:160271660-160271775	ENSPANG00000019718_5:160289640-160289785	ENSG00000038295_4:166025316-166025431	ENSG00000038295_4:166043274-166043419	NA	Baboon	9555
ENSPANG00000019815_14-13	2	ENSPANG00000019815_12:118210352-118210510	ENSPANG00000019815_12:118210352-118210585	ENSG00000144535_2:232263207-232263440	ENSG00000144535_2:232263207-232263440	NA	Baboon	9555
ENSPANG00000019818_7-4	4	ENSPANG00000019818_3:151254727-151254920	ENSPANG00000019818_3:151260548-151260608	ENSG00000128595_7:128754262-128754455	ENSG00000128595_7:128759792-128759852	NA	Baboon	9555
ENSPANG00000019876_12-6	7	ENSPANG00000019876_7:8127959-8128033	ENSPANG00000019876_7:8147269-8147425	ENSG00000198838_15:33530592-33530666	ENSG00000198838_15:33550160-33550316	NA	Baboon	9555
ENSPANG00000019876_14-8	7	ENSPANG00000019876_7:8136453-8136565	ENSPANG00000019876_7:8164345-8164466	ENSG00000198838_15:33539350-33539462	ENSG00000198838_15:33566678-33566799	NA	Baboon	9555
ENSPANG00000020099_7-5	1	ENSPANG00000020099_20:14010785-14010866	ENSPANG00000020099_20:14010785-14010866	ENSG00000140694_16:14627106-14627187	ENSG00000140694_16:14627106-14627187	NA	Baboon	9555
ENSPANG00000020214_19-7	10	ENSPANG00000020214_1:121233510-121233583	ENSPANG00000020214_1:121252321-121252349	ENSG00000143379_1:150943920-150943993	ENSG00000143379_1:150961317-150962158	NA	Baboon	9555
ENSPANG00000020215_13-3	9	ENSPANG00000020215_1:64902236-64902299	ENSPANG00000020215_1:64936652-64936663	ENSG00000118473_1:66625847-66625910	ENSG00000118473_1:66660513-66660524	NA	Baboon	9555
ENSPANG00000020215_30-7	19	ENSPANG00000020215_1:64915402-64915458	ENSPANG00000020215_1:64995884-64995995	ENSG00000118473_1:66639777-66639833	ENSG00000118473_1:66719294-66719405	NA	Baboon	9555
ENSPANG00000020237_18-10	9	ENSPANG00000020237_9:119062716-119062851	ENSPANG00000020237_9:119090633-119090757	ENSG00000150760_10:126996748-126996883	ENSG00000150760_10:127023200-127023324	NA	Baboon	9555
ENSPANG00000020237_28-21	8	ENSPANG00000020237_9:119099063-119099166	ENSPANG00000020237_9:119130526-119130634	ENSG00000150760_10:127031650-127031753	ENSG00000150760_10:127061668-127061776	NA	Baboon	9555
ENSPANG00000020388_13-10	4	ENSPANG00000020388_11:101194508-101194654	ENSPANG00000020388_11:101198132-101198310	ENSG00000120800_12:101291742-101291888	ENSG00000120800_12:101295480-101295658	NA	Baboon	9555
ENSPANG00000020388_38-35	4	ENSPANG00000020388_11:101243701-101243788	ENSPANG00000020388_11:101246396-101246548	ENSG00000120800_12:101340523-101340610	ENSG00000120800_12:101342941-101343093	NA	Baboon	9555
ENSPANG00000020388_50-21	29	ENSPANG00000020388_11:101213709-101213788	ENSPANG00000020388_11:101270643-101270784	ENSG00000120800_12:101311719-101311798	ENSG00000120800_12:101366558-101366699	NA	Baboon	9555
ENSPANG00000020397_11-4	7	ENSPANG00000020397_11:3019401-3019560	ENSPANG00000020397_11:3035540-3035711	ENSG00000078246_12:2920763-2920922	ENSG00000078246_12:2938114-2938285	NA	Baboon	9555
ENSPANG00000020428_13-11	2	ENSPANG00000020428_19:15728242-15728383	ENSPANG00000020428_19:15731527-15731605	ENSG00000099331_19:17172336-17172477	ENSG00000099331_19:17175663-17175741	NA	Baboon	9555
ENSPANG00000020516_10-8	3	ENSPANG00000020516_9:112033116-112033236	ENSPANG00000020516_9:112036385-112036526	ENSG00000107651_10:119912044-119912164	ENSG00000107651_10:119915748-119915889	NA	Baboon	9555
ENSPANG00000020516_18-15	4	ENSPANG00000020516_9:112047036-112047227	ENSPANG00000020516_9:112053464-112053649	ENSG00000107651_10:119926036-119926227	ENSG00000107651_10:119932133-119932318	NA	Baboon	9555
ENSPANG00000020519_9-8	2	ENSPANG00000020519_16:59560051-59560127	ENSPANG00000020519_16:59561564-59561687	ENSG00000130935_17:67734363-67734439	ENSG00000130935_17:67735900-67736023	NA	Baboon	9555
ENSPANG00000020877_14-7	8	ENSPANG00000020877_9:97384270-97384388	ENSPANG00000020877_9:97458193-97458300	ENSG00000156395_10:105105397-105105515	ENSG00000156395_10:105178066-105178173	NA	Baboon	9555
ENSPANG00000020948_9-5	5	ENSPANG00000020948_1:61104940-61105010	ENSPANG00000020948_1:61125465-61125584	ENSG00000125703_1:62821139-62821209	ENSG00000125703_1:62841428-62841547	NA	Baboon	9555
ENSPANG00000020957_5-2	2	ENSPANG00000020957_9:95621232-95621287	ENSPANG00000020957_9:95622539-95622635	ENSG00000156374_10:103347395-103347450	ENSG00000156374_10:103348355-103348812	NA	Baboon	9555
ENSPANG00000020996_4-3	2	ENSPANG00000020996_12:55324532-55324639	ENSPANG00000020996_12:55325594-55325638	ENSG00000138398_2:169606039-169606146	ENSG00000138398_2:169607104-169607148	NA	Baboon	9555
ENSPANG00000021018_16-15	2	ENSPANG00000021018_9:94609489-94609629	ENSPANG00000021018_9:94609943-94610031	ENSG00000107862_10:102363256-102363396	ENSG00000107862_10:102363710-102363798	NA	Baboon	9555
ENSPANG00000021073_26-15	12	ENSPANG00000021073_11:58489983-58490095	ENSPANG00000021073_11:58509523-58509721	ENSG00000061987_12:62537151-62537263	ENSG00000061987_12:62555994-62556192	NA	Baboon	9555
ENSPANG00000021364_13-2	10	ENSPANG00000021364_16:50304647-50304732	ENSPANG00000021364_16:50317317-50317464	ENSG00000067596_17:43489449-43489534	ENSG00000067596_17:43499956-43500103	NA	Baboon	9555
ENSPANG00000021510_12-7	6	ENSPANG00000021510_7:118025256-118025338	ENSPANG00000021510_7:118034272-118034372	ENSG00000139974_14:61037059-61037141	ENSG00000139974_14:61046067-61046167	NA	Baboon	9555
ENSPANG00000021518_20-9	12	ENSPANG00000021518_9:86643246-86643921	ENSPANG00000021518_9:86668773-86668931	ENSG00000138193_10:94245946-94246621	ENSG00000138193_10:94273562-94273720	NA	Baboon	9555
ENSPANG00000021559_10-2	9	ENSPANG00000021559_9:84991261-84991393	ENSPANG00000021559_9:85008513-85008601	ENSG00000138160_10:92606265-92606397	ENSG00000138160_10:92621385-92621473	NA	Baboon	9555
ENSPANG00000021620_26-5	19	ENSPANG00000021620_9:84333583-84333746	ENSPANG00000021620_9:84379787-84379935	ENSG00000095564_10:91951403-91951566	ENSG00000095564_10:91997603-91997751	NA	Baboon	9555
ENSPANG00000021707_28-2	27	ENSPANG00000021707_9:82175769-82175855	ENSPANG00000021707_9:82228675-82228872	ENSG00000138182_10:89709167-89709253	ENSG00000138182_10:89762638-89762835	NA	Baboon	9555
ENSPANG00000021771_19-7	11	ENSPANG00000021771_7:132432945-132433014	ENSPANG00000021771_7:132478936-132478998	ENSG00000119685_14:75707018-75707087	ENSG00000119685_14:75752893-75752955	NA	Baboon	9555
ENSPANG00000021771_28-21	8	ENSPANG00000021771_7:132490529-132490686	ENSPANG00000021771_7:132509307-132509702	ENSG00000119685_14:75764615-75764772	ENSG00000119685_14:75783147-75783530	NA	Baboon	9555
ENSPANG00000021771_32-24	9	ENSPANG00000021771_7:132501961-132502107	ENSPANG00000021771_7:132588595-132588790	ENSG00000119685_14:75775484-75775630	ENSG00000119685_14:75863667-75863862	NA	Baboon	9555
ENSPANG00000021771_32-31	2	ENSPANG00000021771_7:132544382-132544536	ENSPANG00000021771_7:132588595-132588790	ENSG00000119685_14:75820007-75820161	ENSG00000119685_14:75863667-75863862	NA	Baboon	9555
ENSPANG00000021903_10-8	3	ENSPANG00000021903_11:32017875-32017964	ENSPANG00000021903_11:32021162-32021318	ENSG00000139132_12:32598497-32598586	ENSG00000139132_12:32602161-32602317	NA	Baboon	9555
ENSPANG00000021903_13-5	8	ENSPANG00000021903_11:31983217-31983372	ENSPANG00000021903_11:32030476-32030622	ENSG00000139132_12:32564137-32564289	ENSG00000139132_12:32611137-32611283	NA	Baboon	9555
ENSPANG00000021910_14-5	10	ENSPANG00000021910_1:132168716-132168845	ENSPANG00000021910_1:132238162-132238276	ENSG00000118217_1:161791408-161791537	ENSG00000118217_1:161863198-161863312	NA	Baboon	9555
ENSPANG00000021910_15-5	11	ENSPANG00000021910_1:132168716-132168845	ENSPANG00000021910_1:132307982-132308066	ENSG00000118217_1:161791408-161791537	ENSG00000118217_1:161912296-161912380	NA	Baboon	9555
ENSPANG00000021910_6-5	2	ENSPANG00000021910_1:132168716-132168845	ENSPANG00000021910_1:132169386-132169589	ENSG00000118217_1:161791408-161791537	ENSG00000118217_1:161792124-161792327	NA	Baboon	9555
ENSPANG00000021940_9-9	1	ENSPANG00000021940_2:90991888-90992097	ENSPANG00000021940_2:90991888-90992097	ENSG00000163808_3:44794217-44794426	ENSG00000163808_3:44794217-44794426	NA	Baboon	9555
ENSPANG00000021972_14-7	6	ENSPANG00000021972_7:146794710-146794744	ENSPANG00000021972_7:146809036-146809084	ENSG00000042088_14:89975781-89975815	ENSG00000042088_14:89989717-89989765	NA	Baboon	9555
ENSPANG00000021972_16-7	8	ENSPANG00000021972_7:146794710-146794744	ENSPANG00000021972_7:146813001-146813108	ENSG00000042088_14:89975781-89975815	ENSG00000042088_14:89993376-89993483	NA	Baboon	9555
ENSPANG00000021972_17-8	8	ENSPANG00000021972_7:146799541-146799633	ENSPANG00000021972_7:146838963-146839065	ENSG00000042088_14:89980540-89980679	ENSG00000042088_14:90019316-90019418	NA	Baboon	9555
ENSPANG00000022056_17-17	2	ENSPANG00000022056_3:92648498-92648761	ENSPANG00000022056_3:92648447-92648761	ENSG00000048052_7:18666213-18666476	ENSG00000048052_7:18666213-18666476	NA	Baboon	9555
ENSPANG00000022122_3-3	1	ENSPANG00000022122_9:61524721-61527016	ENSPANG00000022122_9:61524721-61527016	ENSG00000138336_10:68644698-68647005	ENSG00000138336_10:68644698-68647005	NA	Baboon	9555
ENSPANG00000022171_13-12	2	ENSPANG00000022171_16:41047068-41047130	ENSPANG00000022171_16:41047316-41047393	ENSG00000108443_17:59936215-59936541	ENSG00000108443_17:59936215-59936541	NA	Baboon	9555
ENSPANG00000022191_2-2	1	ENSPANG00000022191_3:48937773-48937985	ENSPANG00000022191_3:48937773-48937985	ENSG00000158321_7:69899286-69899498	ENSG00000158321_7:69899286-69899498	NA	Baboon	9555
ENSPANG00000022196_8-7	2	ENSPANG00000022196_13:31368577-31368657	ENSPANG00000022196_13:31369168-31369203	ENSG00000152683_2:32192336-32192416	ENSG00000152683_2:32192918-32192953	NA	Baboon	9555
ENSPANG00000022233_19-11	8	ENSPANG00000022233_20:17809356-17809440	ENSPANG00000022233_20:17834423-17834545	ENSG00000103544_16:19591790-19591874	ENSG00000103544_16:19616686-19616808	NA	Baboon	9555
ENSPANG00000022233_33-28	6	ENSPANG00000022233_20:17863165-17863228	ENSPANG00000022233_20:17900629-17900794	ENSG00000103544_16:19644886-19644949	ENSG00000103544_16:19682225-19682390	NA	Baboon	9555
ENSPANG00000022233_34-28	7	ENSPANG00000022233_20:17863165-17863228	ENSPANG00000022233_20:17909703-17909821	ENSG00000103544_16:19644886-19644949	ENSG00000103544_16:19691353-19691471	NA	Baboon	9555
ENSPANG00000022340_17-13	5	ENSPANG00000022340_13:22813036-22813234	ENSPANG00000022340_13:22821253-22821397	ENSG00000119771_2:23695623-23695821	ENSG00000119771_2:23703719-23703863	NA	Baboon	9555
ENSPANG00000022358_12-3	10	ENSPANG00000022358_16:36257203-36257309	ENSPANG00000022358_16:36331477-36331653	ENSG00000166263_17:54999345-54999451	ENSG00000166263_17:55072900-55073076	NA	Baboon	9555
ENSPANG00000022471_2-2	1	ENSPANG00000022471_9:54845598-54846190	ENSPANG00000022471_9:54845598-54846190	ENSG00000156671_10:75150514-75151106	ENSG00000156671_10:75150514-75151106	NA	Baboon	9555
ENSPANG00000022645_16-11	6	ENSPANG00000022645_6:89240673-89240726	ENSPANG00000022645_6:89257022-89257169	ENSG00000133302_5:94662298-94662351	ENSG00000133302_5:94678399-94678955	NA	Baboon	9555
ENSPANG00000022645_16-7	9	ENSPANG00000022645_6:89228505-89228648	ENSPANG00000022645_6:89257022-89257169	ENSG00000133302_5:94649454-94649597	ENSG00000133302_5:94678399-94678955	NA	Baboon	9555
ENSPANG00000022645_16-8	8	ENSPANG00000022645_6:89230455-89230601	ENSPANG00000022645_6:89257022-89257169	ENSG00000133302_5:94651702-94651845	ENSG00000133302_5:94678399-94678955	NA	Baboon	9555
ENSPANG00000022645_16-9	7	ENSPANG00000022645_6:89232014-89232163	ENSPANG00000022645_6:89257022-89257169	ENSG00000133302_5:94653272-94653421	ENSG00000133302_5:94678399-94678955	NA	Baboon	9555
ENSPANG00000022645_8-8	1	ENSPANG00000022645_6:89230455-89230601	ENSPANG00000022645_6:89230455-89230601	ENSG00000133302_5:94651702-94651845	ENSG00000133302_5:94651702-94651845	NA	Baboon	9555
ENSPANG00000022650_20-8	11	ENSPANG00000022650_9:40649754-40649882	ENSPANG00000022650_9:40685450-40686157	ENSG00000225830_10:49500538-49506480	ENSG00000225830_10:49470182-49470889	NA	Baboon	9555
ENSPANG00000022650_20-9	10	ENSPANG00000022650_9:40655079-40655237	ENSPANG00000022650_9:40685450-40686157	ENSG00000225830_10:49500538-49500696	ENSG00000225830_10:49470182-49470889	NA	Baboon	9555
ENSPANG00000022702_7-5	3	ENSPANG00000022702_4:15365719-15365860	ENSPANG00000022702_4:15423512-15423688	ENSG00000008083_6:15410224-15410365	ENSG00000008083_6:15468542-15468718	NA	Baboon	9555
ENSPANG00000022726_10-3	8	ENSPANG00000022726_1:83831959-83832087	ENSPANG00000022726_1:83855128-83855356	ENSG00000097033_1:86719507-86719635	ENSG00000097033_1:86742208-86742436	NA	Baboon	9555
ENSPANG00000022843_2-2	1	ENSPANG00000022843_3:67857371-67857583	ENSPANG00000022843_3:67857371-67857583	ENSG00000164543_7:43595901-43596113	ENSG00000164543_7:43595901-43596113	NA	Baboon	9555
ENSPANG00000022967_19-7	12	ENSPANG00000022967_1:76176907-76177043	ENSPANG00000022967_1:76249390-76249443	ENSG00000180488_1:77803270-77803406	ENSG00000180488_1:77866338-77866391	NA	Baboon	9555
ENSPANG00000023001_10-9	2	ENSPANG00000023001_9:26671181-26672087	ENSPANG00000023001_9:26671181-26672320	ENSG00000120539_10:27169944-27171083	ENSG00000120539_10:27169944-27171083	NA	Baboon	9555
ENSPANG00000023036_4-2	3	ENSPANG00000023036_9:26243614-26243646	ENSPANG00000023036_9:26246482-26246590	ENSG00000148459_10:26702162-26702194	ENSG00000148459_10:26705286-26705394	NA	Baboon	9555
ENSPANG00000023108_25-18	6	ENSPANG00000023108_9:21323026-21323070	ENSPANG00000023108_9:21357872-21358050	ENSG00000078403_10:21681332-21681376	ENSG00000078403_10:21713772-21713950	NA	Baboon	9555
ENSPANG00000023141_13-10	4	ENSPANG00000023141_9:18107275-18107394	ENSPANG00000023141_9:18207803-18207879	ENSG00000165995_10:18401924-18402043	ENSG00000165995_10:18506471-18506547	NA	Baboon	9555
ENSPANG00000023142_12-10	4	ENSPANG00000023142_16:24268970-24269037	ENSPANG00000023142_16:24270382-24270539	ENSG00000196712_17:31181422-31181489	ENSG00000196712_17:31182508-31182665	NA	Baboon	9555
ENSPANG00000023174_75-67	10	ENSPANG00000023174_14:93378670-93378789	ENSPANG00000023174_14:93411555-93411627	ENSG00000187240_11:103255415-103255534	ENSG00000187240_11:103287533-103287605	NA	Baboon	9555
ENSPANG00000023174_87-71	16	ENSPANG00000023174_14:93403896-93403961	ENSPANG00000023174_14:93544964-93545053	ENSG00000187240_11:103280348-103280413	ENSG00000187240_11:103435943-103436032	NA	Baboon	9555
ENSPANG00000023174_89-78	12	ENSPANG00000023174_14:93426894-93427054	ENSPANG00000023174_14:93565695-93565776	ENSG00000187240_11:103303093-103303253	ENSG00000187240_11:103456275-103456356	NA	Baboon	9555
ENSPANG00000023174_90-63	25	ENSPANG00000023174_14:93366643-93366741	ENSPANG00000023174_14:93577423-93577539	ENSG00000187240_11:103243693-103243791	ENSG00000187240_11:103468389-103468705	NA	Baboon	9555
ENSPANG00000023174_90-86	5	ENSPANG00000023174_14:93519909-93520118	ENSPANG00000023174_14:93577423-93577539	ENSG00000187240_11:103399663-103399872	ENSG00000187240_11:103468389-103468705	NA	Baboon	9555
ENSPANG00000023200_21-14	7	ENSPANG00000023200_7:102276340-102276495	ENSPANG00000023200_7:102292956-102293519	ENSG00000187790_14:45173055-45173210	ENSG00000187790_14:45188802-45189362	NA	Baboon	9555
ENSPANG00000023238_15-7	8	ENSPANG00000023238_12:89292235-89292411	ENSPANG00000023238_12:89329549-89329722	ENSG00000138443_2:203380208-203380384	ENSG00000138443_2:203416908-203417081	NA	Baboon	9555
ENSPANG00000023290_17-13	5	ENSPANG00000023290_4:79784010-79784150	ENSPANG00000023290_4:79805073-79805237	ENSG00000065615_6:83934595-83934735	ENSG00000065615_6:83955298-83955462	NA	Baboon	9555
ENSPANG00000023318_8-8	1	ENSPANG00000023318_6:144404790-144405287	ENSPANG00000023318_6:144404790-144405287	ENSG00000113716_5:150010111-150010608	ENSG00000113716_5:150010111-150010608	NA	Baboon	9555
ENSPANG00000023338_11-6	6	ENSPANG00000023338_17:50680268-50680374	ENSPANG00000023338_17:50690768-50690871	ENSG00000136122_13:72731281-72731387	ENSG00000136122_13:72743537-72743602	NA	Baboon	9555
ENSPANG00000023338_15-7	8	ENSPANG00000023338_17:50683989-50684034	ENSPANG00000023338_17:50695406-50696016	ENSG00000136122_13:72734960-72735005	ENSG00000136122_13:72746501-72747111	NA	Baboon	9555
ENSPANG00000023532_6-4	3	ENSPANG00000023532_9:1158945-1159041	ENSPANG00000023532_9:1161146-1161210	ENSG00000047056_10:1077907-1078003	ENSG00000047056_10:1080412-1080476	NA	Baboon	9555
ENSPANG00000023565_5-5	1	ENSPANG00000023565_8:9386486-9386710	ENSPANG00000023565_8:9386486-9386710	ENSG00000173273_8:9580159-9580383	ENSG00000173273_8:9580159-9580383	NA	Baboon	9555
ENSPANG00000023959_4-4	1	ENSPANG00000023959_17:30442939-30443169	ENSPANG00000023959_17:30442939-30443169	ENSG00000253710_13:52018913-52019143	ENSG00000253710_13:52018913-52019143	NA	Baboon	9555
ENSPANG00000024430_3-3	1	ENSPANG00000024430_2:110954683-110955184	ENSPANG00000024430_2:110954683-110955184	ENSG00000177694_3:175096790-175097291	ENSG00000177694_3:175096790-175097291	NA	Baboon	9555
ENSPANG00000024430_4-4	1	ENSPANG00000024430_2:110820837-110821110	ENSPANG00000024430_2:110820837-110821110	ENSG00000177694_3:175233931-175234204	ENSG00000177694_3:175233931-175234204	NA	Baboon	9555
ENSPANG00000024470_8-4	5	ENSPANG00000024470_6:108000791-108000987	ENSPANG00000024470_6:108011112-108011268	ENSG00000047188_5:113524981-113525177	ENSG00000047188_5:113535642-113535798	NA	Baboon	9555
ENSPANG00000024547_15-11	5	ENSPANG00000024547_13:84512724-84512792	ENSPANG00000024547_13:84521165-84521295	ENSG00000115459_2:85368686-85368754	ENSG00000115459_2:85377344-85377474	NA	Baboon	9555
ENSPANG00000024636_2-2	1	ENSPANG00000024636_15:106199588-106199750	ENSPANG00000024636_15:106199588-106199750	ENSG00000130956_9:96458379-96458541	ENSG00000130956_9:96458379-96458541	NA	Baboon	9555
ENSPANG00000024680_62-61	2	ENSPANG00000024680_1:206547584-206547707	ENSPANG00000024680_1:206548237-206548352	ENSG00000198626_1:237674096-237674219	ENSG00000198626_1:237674731-237674846	NA	Baboon	9555
ENSPANG00000024680_77-70	8	ENSPANG00000024680_1:206576091-206576172	ENSPANG00000024680_1:206595438-206595608	ENSG00000198626_1:237701978-237702059	ENSG00000198626_1:237717198-237717368	NA	Baboon	9555
ENSPANG00000024680_85-77	6	ENSPANG00000024680_1:206595438-206595608	ENSPANG00000024680_1:206611603-206611654	ENSG00000198626_1:237717198-237717368	ENSG00000198626_1:237733705-237733756	NA	Baboon	9555
ENSPANG00000024686_8-7	2	ENSPANG00000024686_15:104241095-104241313	ENSPANG00000024686_15:104243000-104243113	ENSG00000148110_9:94444964-94445182	ENSG00000148110_9:94446823-94446936	NA	Baboon	9555
ENSPANG00000024691_10-2	8	ENSPANG00000024691_15:103888940-103889027	ENSPANG00000024691_15:103922429-103922539	ENSG00000158079_9:94064734-94064821	ENSG00000158079_9:94104275-94104385	NA	Baboon	9555
ENSPANG00000024934_10-4	7	ENSPANG00000024934_15:83263410-83263553	ENSPANG00000024934_15:83373357-83373460	ENSG00000099139_9:76023738-76023881	ENSG00000099139_9:76134109-76134212	NA	Baboon	9555
ENSPANG00000024934_7-2	6	ENSPANG00000024934_15:83169916-83170020	ENSPANG00000024934_15:83310664-83310836	ENSG00000099139_9:75932379-75932483	ENSG00000099139_9:76071726-76071898	NA	Baboon	9555
ENSPANG00000024934_7-3	5	ENSPANG00000024934_15:83226707-83226820	ENSPANG00000024934_15:83310664-83310836	ENSG00000099139_9:75986132-75986245	ENSG00000099139_9:76071726-76071898	NA	Baboon	9555
ENSPANG00000024934_7-4	4	ENSPANG00000024934_15:83263410-83263553	ENSPANG00000024934_15:83310664-83310836	ENSG00000099139_9:76023738-76023881	ENSG00000099139_9:76071726-76071898	NA	Baboon	9555
ENSPANG00000024934_8-4	5	ENSPANG00000024934_15:83263410-83263553	ENSPANG00000024934_15:83335726-83335938	ENSG00000099139_9:76023738-76023881	ENSG00000099139_9:76095890-76096102	NA	Baboon	9555
ENSPANG00000024934_9-2	8	ENSPANG00000024934_15:83169916-83170020	ENSPANG00000024934_15:83346834-83346934	ENSG00000099139_9:75932379-75932483	ENSG00000099139_9:76107251-76107351	NA	Baboon	9555
ENSPANG00000024943_26-8	11	ENSPANG00000024943_11:47779630-47779851	ENSPANG00000024943_11:47829059-47829297	ENSG00000196876_12:51699570-51699791	ENSG00000196876_12:51751355-51751593	NA	Baboon	9555
ENSPANG00000024975_18-9	9	ENSPANG00000024975_4:13157534-13157855	ENSPANG00000024975_4:13236605-13236681	ENSG00000112137_6:13205815-13206136	ENSG00000112137_6:13286146-13286222	NA	Baboon	9555
ENSPANG00000025013_4-2	3	ENSPANG00000025013_7:125951992-125952371	ENSPANG00000025013_7:125972388-125972514	ENSG00000081177_14:69209424-69209803	ENSG00000081177_14:69230472-69230598	NA	Baboon	9555
ENSPANG00000025137_18-10	9	ENSPANG00000025137_3:36744206-36744342	ENSPANG00000025137_3:36841823-36841944	ENSG00000146555_7:3987186-3987322	ENSG00000146555_7:4079463-4079584	NA	Baboon	9555
ENSPANG00000025137_18-11	8	ENSPANG00000025137_3:36768361-36768508	ENSPANG00000025137_3:36841823-36841944	ENSG00000146555_7:4010966-4011113	ENSG00000146555_7:4079463-4079584	NA	Baboon	9555
ENSPANG00000025220_11-4	8	ENSPANG00000025220_2:13334643-13334798	ENSPANG00000025220_2:13404536-13404721	ENSG00000044524_3:89340916-89341071	ENSG00000044524_3:89419205-89419390	NA	Baboon	9555
ENSPANG00000025220_15-14	2	ENSPANG00000025220_2:13434659-13434808	ENSPANG00000025220_2:13435595-13435788	ENSG00000044524_3:89449225-89449374	ENSG00000044524_3:89450177-89450370	NA	Baboon	9555
ENSPANG00000025224_3-3	1	ENSPANG00000025224_13:103559348-103559528	ENSPANG00000025224_13:103559348-103559528	ENSG00000188177_2:112299849-112300029	ENSG00000188177_2:112299849-112300029	NA	Baboon	9555
ENSPANG00000025440_20-3	15	ENSPANG00000025440_8:99450829-99451754	ENSPANG00000025440_8:99583018-99583127	ENSG00000176406_8:103885298-103886223	ENSG00000176406_8:104014506-104014615	NA	Baboon	9555
ENSPANG00000025440_20-5	13	ENSPANG00000025440_8:99477123-99477331	ENSPANG00000025440_8:99583018-99583127	ENSG00000176406_8:103910321-103910529	ENSG00000176406_8:104014506-104014615	NA	Baboon	9555
ENSPANG00000025440_21-3	16	ENSPANG00000025440_8:99450829-99451754	ENSPANG00000025440_8:99583949-99583981	ENSG00000176406_8:103885298-103886223	ENSG00000176406_8:104015424-104015456	NA	Baboon	9555
ENSPANG00000025440_21-4	15	ENSPANG00000025440_8:99476931-99476998	ENSPANG00000025440_8:99583949-99583981	ENSG00000176406_8:103910134-103910201	ENSG00000176406_8:104015424-104015456	NA	Baboon	9555
ENSPANG00000025440_3-3	1	ENSPANG00000025440_8:99450829-99451754	ENSPANG00000025440_8:99450829-99451754	ENSG00000176406_8:103885298-103886223	ENSG00000176406_8:103885298-103886223	NA	Baboon	9555
ENSPANG00000025442_13-4	9	ENSPANG00000025442_5:142618625-142618696	ENSPANG00000025442_5:142682944-142683009	ENSG00000071205_4:147847151-147847222	ENSG00000071205_4:147913074-147913139	NA	Baboon	9555
ENSPANG00000025442_19-4	15	ENSPANG00000025442_5:142618625-142618696	ENSPANG00000025442_5:142734168-142734327	ENSG00000071205_4:147847151-147847222	ENSG00000071205_4:147966680-147966839	NA	Baboon	9555
ENSPANG00000025442_19-8	11	ENSPANG00000025442_5:142647351-142647480	ENSPANG00000025442_5:142734168-142734327	ENSG00000071205_4:147875021-147875150	ENSG00000071205_4:147966680-147966839	NA	Baboon	9555
ENSPANG00000025442_20-12	9	ENSPANG00000025442_5:142679611-142679656	ENSPANG00000025442_5:142786276-142786426	ENSG00000071205_4:147909732-147909777	ENSG00000071205_4:148023054-148023413	NA	Baboon	9555
ENSPANG00000025444_9-8	3	ENSPANG00000025444_2:48684026-48684191	ENSPANG00000025444_2:48685806-48685868	ENSG00000144559_3:11807833-11809682	ENSG00000144559_3:11807833-11809682	NA	Baboon	9555
ENSPANG00000025530_19-2	13	ENSPANG00000025530_13:28289393-28289532	ENSPANG00000025530_13:28324189-28324253	ENSG00000115295_2:29131258-29132650	ENSG00000115295_2:29167476-29167540	NA	Baboon	9555
ENSPANG00000025539_20-6	11	ENSPANG00000025539_7:123520481-123520573	ENSPANG00000025539_7:123725840-123725882	ENSG00000171723_14:66824474-66824566	ENSG00000171723_14:67023633-67023675	NA	Baboon	9555
ENSPANG00000025539_29-28	2	ENSPANG00000025539_7:123832012-123832133	ENSPANG00000025539_7:123857828-123857915	ENSG00000171723_14:67122256-67122377	ENSG00000171723_14:67143001-67143449	NA	Baboon	9555
ENSPANG00000025628_13-10	4	ENSPANG00000025628_5:118308694-118308848	ENSPANG00000025628_5:118369143-118369222	ENSG00000145375_4:122979232-122979386	ENSG00000145375_4:123057209-123057288	NA	Baboon	9555
ENSPANG00000025628_15-11	4	ENSPANG00000025628_5:118351165-118351374	ENSPANG00000025628_5:118400760-118400886	ENSG00000145375_4:123028186-123028395	ENSG00000145375_4:123090579-123090705	NA	Baboon	9555
ENSPANG00000026002_17-2	16	ENSPANG00000026002_4:46941023-46941183	ENSPANG00000026002_4:47050889-47050952	ENSG00000198087_6:47503280-47503440	ENSG00000198087_6:47612473-47612536	NA	Baboon	9555
ENSPANG00000026002_17-6	12	ENSPANG00000026002_4:47011457-47011644	ENSPANG00000026002_4:47050889-47050952	ENSG00000198087_6:47574064-47574251	ENSG00000198087_6:47612473-47612536	NA	Baboon	9555
ENSPANG00000026190_4-3	2	ENSPANG00000026190_10:490226-491195	ENSPANG00000026190_10:506084-506368	ENSG00000130584_20:63789821-63790923	ENSG00000130584_20:63775678-63775962	NA	Baboon	9555
ENSPANG00000026303_21-14	8	ENSPANG00000026303_13:32410124-32410351	ENSPANG00000026303_13:32432850-32432969	ENSG00000049323_2:33257284-33257511	ENSG00000049323_2:33280039-33280158	NA	Baboon	9555
ENSPANG00000026303_24-13	12	ENSPANG00000026303_13:32406608-32406775	ENSPANG00000026303_13:32453159-32453281	ENSG00000049323_2:33252677-33252844	ENSG00000049323_2:33301522-33301644	NA	Baboon	9555
ENSPANG00000026303_33-13	21	ENSPANG00000026303_13:32406608-32406775	ENSPANG00000026303_13:32515845-32516015	ENSG00000049323_2:33252677-33252844	ENSG00000049323_2:33365333-33365503	NA	Baboon	9555
ENSPANG00000026303_33-19	15	ENSPANG00000026303_13:32427793-32427918	ENSPANG00000026303_13:32515845-32516015	ENSG00000049323_2:33274965-33275090	ENSG00000049323_2:33365333-33365503	NA	Baboon	9555
ENSPANG00000026366_11-7	5	ENSPANG00000026366_18:58430691-58430944	ENSPANG00000026366_18:58449256-58449507	ENSG00000081138_18:65843812-65844065	ENSG00000081138_18:65862666-65862917	NA	Baboon	9555
ENSPANG00000029371_3-3	1	ENSPANG00000029371_1:111203724-111203906	ENSPANG00000029371_1:111203724-111203906	ENSG00000118655_1:113908009-113908191	ENSG00000118655_1:113908009-113908191	NA	Baboon	9555
ENSPANG00000029701_5-5	1	ENSPANG00000029701_7:135462984-135463367	ENSPANG00000029701_7:135462984-135463367	ENSG00000021645_14:78714756-78715139	ENSG00000021645_14:78714756-78715139	NA	Baboon	9555
ENSPANG00000029860_11-3	9	ENSPANG00000029860_1:213348183-213348256	ENSPANG00000029860_1:213438645-213439087	ENSG00000179397_1:244477541-244477614	ENSG00000179397_1:244572330-244572772	NA	Baboon	9555
ENSPANG00000031551_42-34	9	ENSPANG00000031551_11:122526688-122526968	ENSPANG00000031551_11:122535881-122535997	ENSG00000184445_12:122582705-122582985	ENSG00000184445_12:122591337-122591453	NA	Baboon	9555
ENSPANG00000032488_5-4	2	ENSPANG00000032488_10:58275447-58275537	ENSPANG00000032488_10:58283615-58283731	ENSG00000101003_20:25418105-25418195	ENSG00000101003_20:25425211-25425327	NA	Baboon	9555
ENSPANG00000034587_4-3	2	ENSPANG00000034587_8:76552991-76553117	ENSPANG00000034587_8:76553172-76553873	ENSG00000205189_8:80499494-80500382	ENSG00000205189_8:80499494-80500382	NA	Baboon	9555
ENSPANG00000036022_21-6	13	ENSPANG00000036022_4:71571672-71571765	ENSPANG00000036022_4:71629554-71629670	ENSG00000112701_6:75621532-75621625	ENSG00000112701_6:75678811-75678927	NA	Baboon	9555
ENSPANG00000036022_24-12	10	ENSPANG00000036022_4:71610206-71610351	ENSPANG00000036022_4:71649996-71650423	ENSG00000112701_6:75659262-75659407	ENSG00000112701_6:75702645-75703072	NA	Baboon	9555
ENSPANG00000036022_24-24	1	ENSPANG00000036022_4:71649996-71650423	ENSPANG00000036022_4:71649996-71650423	ENSG00000112701_6:75702645-75703072	ENSG00000112701_6:75702645-75703072	NA	Baboon	9555
ENSMMUG00000000187_6-3	4	ENSMMUG00000000187_14:68028226-68028343	ENSMMUG00000000187_14:68068362-68068436	ENSG00000198382_11:75851883-75852000	ENSG00000198382_11:75888829-75888903	NA	Macaque	9544
ENSMMUG00000000237_11-7	5	ENSMMUG00000000237_5:37661680-37661769	ENSMMUG00000000237_5:37679002-37679112	ENSG00000065882_4:38018354-38018443	ENSG00000065882_4:38035588-38035698	NA	Macaque	9544
ENSMMUG00000000237_17-7	10	ENSMMUG00000000237_5:37661680-37661769	ENSMMUG00000000237_5:37697930-37698069	ENSG00000065882_4:38018354-38018443	ENSG00000065882_4:38054199-38054338	NA	Macaque	9544
ENSMMUG00000000237_17-8	9	ENSMMUG00000000237_5:37663824-37663928	ENSMMUG00000000237_5:37697930-37698069	ENSG00000065882_4:38020591-38020695	ENSG00000065882_4:38054199-38054338	NA	Macaque	9544
ENSMMUG00000000238_24-4	20	ENSMMUG00000000238_9:86683568-86683697	ENSMMUG00000000238_9:86750468-86750611	ENSG00000165338_10:91425281-91425410	ENSG00000165338_10:91501191-91501334	NA	Macaque	9544
ENSMMUG00000000382_10-6	5	ENSMMUG00000000382_12:95176991-95177086	ENSMMUG00000000382_12:95228491-95228608	ENSG00000144451_2:213297262-213297357	ENSG00000144451_2:213350528-213350645	NA	Macaque	9544
ENSMMUG00000000382_8-6	3	ENSMMUG00000000382_12:95176991-95177086	ENSMMUG00000000382_12:95198498-95198635	ENSG00000144451_2:213297262-213297357	ENSG00000144451_2:213317219-213317356	NA	Macaque	9544
ENSMMUG00000000386_9-5	5	ENSMMUG00000000386_1:62505899-62505969	ENSMMUG00000000386_1:62526502-62526621	ENSG00000125703_1:62821139-62821209	ENSG00000125703_1:62841428-62841547	NA	Macaque	9544
ENSMMUG00000000419_21-2	19	ENSMMUG00000000419_6:140671035-140671130	ENSMMUG00000000419_6:140947755-140947905	ENSG00000145819_5:142873400-142873495	ENSG00000145819_5:143147231-143147381	NA	Macaque	9544
ENSMMUG00000000455_18-8	10	ENSMMUG00000000455_6:136111633-136112232	ENSMMUG00000000455_6:136150995-136151166	ENSG00000120733_5:138386022-138386190	ENSG00000120733_5:138425411-138425582	NA	Macaque	9544
ENSMMUG00000000466_4-4	1	ENSMMUG00000000466_X:142369511-142370371	ENSMMUG00000000466_X:142369511-142370371	ENSG00000155966_X:148661908-148662768	ENSG00000155966_X:148661908-148662768	NA	Macaque	9544
ENSMMUG00000000498_14-6	9	ENSMMUG00000000498_13:61565305-61565386	ENSMMUG00000000498_13:61577580-61577652	ENSG00000115421_2:60768470-60768551	ENSG00000115421_2:60780707-60780779	NA	Macaque	9544
ENSMMUG00000000498_20-6	13	ENSMMUG00000000498_13:61565305-61565386	ENSMMUG00000000498_13:61584420-61584529	ENSG00000115421_2:60768470-60768551	ENSG00000115421_2:60787511-60787620	NA	Macaque	9544
ENSMMUG00000000576_11-7	5	ENSMMUG00000000576_18:55515355-55515608	ENSMMUG00000000576_18:55534352-55534603	ENSG00000081138_18:65843812-65844065	ENSG00000081138_18:65862666-65862917	NA	Macaque	9544
ENSMMUG00000000637_21-18	5	ENSMMUG00000000637_1:66440878-66440929	ENSMMUG00000000637_1:66448912-66448986	ENSG00000118473_1:66671944-66671995	ENSG00000118473_1:66679678-66679752	NA	Macaque	9544
ENSMMUG00000000644_4-4	1	ENSMMUG00000000644_1:25062058-25062752	ENSMMUG00000000644_1:25062058-25062752	ENSG00000130695_1:26255171-26255865	ENSG00000130695_1:26255171-26255865	NA	Macaque	9544
ENSMMUG00000000784_14-8	6	ENSMMUG00000000784_17:53853976-53854082	ENSMMUG00000000784_17:53866141-53866244	ENSG00000136122_13:72731281-72731387	ENSG00000136122_13:72743537-72743602	NA	Macaque	9544
ENSMMUG00000000893_11-10	2	ENSMMUG00000000893_10:83189606-83189699	ENSMMUG00000000893_10:83191956-83192093	ENSG00000100393_22:41135813-41135906	ENSG00000100393_22:41137653-41137790	NA	Macaque	9544
ENSMMUG00000000893_21-18	4	ENSMMUG00000000893_10:83206181-83206360	ENSMMUG00000000893_10:83210599-83210838	ENSG00000100393_22:41151833-41152012	ENSG00000100393_22:41157169-41157408	NA	Macaque	9544
ENSMMUG00000000893_26-18	8	ENSMMUG00000000893_10:83206181-83206360	ENSMMUG00000000893_10:83220153-83220220	ENSG00000100393_22:41151833-41152012	ENSG00000100393_22:41166599-41166666	NA	Macaque	9544
ENSMMUG00000000893_30-18	12	ENSMMUG00000000893_10:83206181-83206360	ENSMMUG00000000893_10:83224138-83224303	ENSG00000100393_22:41151833-41152012	ENSG00000100393_22:41170406-41170571	NA	Macaque	9544
ENSMMUG00000000956_27-25	3	ENSMMUG00000000956_11:61469342-61469504	ENSMMUG00000000956_11:61475991-61476189	ENSG00000061987_12:62549668-62549830	ENSG00000061987_12:62555994-62556192	NA	Macaque	9544
ENSMMUG00000000965_6-6	1	ENSMMUG00000000965_8:10272644-10272868	ENSMMUG00000000965_8:10272644-10272868	ENSG00000173273_8:9580159-9580383	ENSG00000173273_8:9580159-9580383	NA	Macaque	9544
ENSMMUG00000001008_90-85	6	ENSMMUG00000001008_7:126081305-126081406	ENSMMUG00000001008_7:126090978-126091174	ENSG00000054654_14:64128452-64128553	ENSG00000054654_14:64137787-64137983	NA	Macaque	9544
ENSMMUG00000001060_98-95	4	ENSMMUG00000001060_1:214132449-214132548	ENSMMUG00000001060_1:214137115-214137188	ENSG00000198626_1:237756288-237756387	ENSG00000198626_1:237760955-237761028	NA	Macaque	9544
ENSMMUG00000001063_10-3	8	ENSMMUG00000001063_6:5304023-5304081	ENSMMUG00000001063_6:5312017-5312054	ENSG00000164151_5:5436418-5436476	ENSG00000164151_5:5444289-5444326	NA	Macaque	9544
ENSMMUG00000001084_20-15	6	ENSMMUG00000001084_7:120415314-120415481	ENSMMUG00000001084_7:120422959-120423031	ENSG00000100578_14:58450579-58450746	ENSG00000100578_14:58458473-58458545	NA	Macaque	9544
ENSMMUG00000001084_22-16	7	ENSMMUG00000001084_7:120417826-120417949	ENSMMUG00000001084_7:120426158-120426332	ENSG00000100578_14:58453350-58453473	ENSG00000100578_14:58460986-58461160	NA	Macaque	9544
ENSMMUG00000001266_10-6	5	ENSMMUG00000001266_16:66739010-66739166	ENSMMUG00000001266_16:66742493-66742654	ENSG00000166685_17:73199865-73200021	ENSG00000166685_17:73203632-73203793	NA	Macaque	9544
ENSMMUG00000001313_9-8	2	ENSMMUG00000001313_12:124278212-124278326	ENSMMUG00000001313_12:124282882-124283029	ENSG00000006607_2:241413307-241413421	ENSG00000006607_2:241417962-241418109	NA	Macaque	9544
ENSMMUG00000001376_17-3	15	ENSMMUG00000001376_6:110956790-110956986	ENSMMUG00000001376_6:110987199-110987281	ENSG00000047188_5:113524981-113525177	ENSG00000047188_5:113556052-113556134	NA	Macaque	9544
ENSMMUG00000001376_23-3	20	ENSMMUG00000001376_6:110956790-110956986	ENSMMUG00000001376_6:110998919-110999114	ENSG00000047188_5:113524981-113525177	ENSG00000047188_5:113567654-113567849	NA	Macaque	9544
ENSMMUG00000001376_24-5	19	ENSMMUG00000001376_6:110964648-110964814	ENSMMUG00000001376_6:111011437-111011546	ENSG00000047188_5:113532879-113533045	ENSG00000047188_5:113579586-113579695	NA	Macaque	9544
ENSMMUG00000001376_24-8	16	ENSMMUG00000001376_6:110970658-110970765	ENSMMUG00000001376_6:111011437-111011546	ENSG00000047188_5:113539074-113539181	ENSG00000047188_5:113579586-113579695	NA	Macaque	9544
ENSMMUG00000001376_28-14	13	ENSMMUG00000001376_6:110984748-110984844	ENSMMUG00000001376_6:111023077-111023259	ENSG00000047188_5:113553590-113553686	ENSG00000047188_5:113591996-113592178	NA	Macaque	9544
ENSMMUG00000001376_28-8	19	ENSMMUG00000001376_6:110970658-110970765	ENSMMUG00000001376_6:111023077-111023259	ENSG00000047188_5:113539074-113539181	ENSG00000047188_5:113591996-113592178	NA	Macaque	9544
ENSMMUG00000001376_7-3	5	ENSMMUG00000001376_6:110956790-110956986	ENSMMUG00000001376_6:110967170-110967326	ENSG00000047188_5:113524981-113525177	ENSG00000047188_5:113535642-113535798	NA	Macaque	9544
ENSMMUG00000001392_10-5	5	ENSMMUG00000001392_6:91635478-91635621	ENSMMUG00000001392_6:91649112-91649270	ENSG00000133302_5:94649454-94649597	ENSG00000133302_5:94663750-94663908	NA	Macaque	9544
ENSMMUG00000001392_14-5	9	ENSMMUG00000001392_6:91635478-91635621	ENSMMUG00000001392_6:91664335-91664482	ENSG00000133302_5:94649454-94649597	ENSG00000133302_5:94678399-94678955	NA	Macaque	9544
ENSMMUG00000001392_14-9	6	ENSMMUG00000001392_6:91647666-91647719	ENSMMUG00000001392_6:91664335-91664482	ENSG00000133302_5:94662298-94662351	ENSG00000133302_5:94678399-94678955	NA	Macaque	9544
ENSMMUG00000001608_10-10	1	ENSMMUG00000001608_9:89465808-89466483	ENSMMUG00000001608_9:89465808-89466483	ENSG00000138193_10:94245946-94246621	ENSG00000138193_10:94245946-94246621	NA	Macaque	9544
ENSMMUG00000001608_27-16	11	ENSMMUG00000001608_9:89482057-89482295	ENSMMUG00000001608_9:89515748-89516038	ENSG00000138193_10:94262494-94262732	ENSG00000138193_10:94298379-94298669	NA	Macaque	9544
ENSMMUG00000001740_8-3	6	ENSMMUG00000001740_7:70176860-70177325	ENSMMUG00000001740_7:70390756-70390894	ENSG00000176463_15:91915993-91916458	ENSG00000176463_15:92128351-92128489	NA	Macaque	9544
ENSMMUG00000001898_12-4	9	ENSMMUG00000001898_15:102172662-102172695	ENSMMUG00000001898_15:102234744-102234858	ENSG00000135040_9:85956360-85956393	ENSG00000135040_9:85978267-85978381	NA	Macaque	9544
ENSMMUG00000001898_17-8	9	ENSMMUG00000001898_15:102231448-102231514	ENSMMUG00000001898_15:102271880-102271946	ENSG00000135040_9:85974967-85975033	ENSG00000135040_9:86009865-86009931	NA	Macaque	9544
ENSMMUG00000001909_9-5	4	ENSMMUG00000001909_11:111296880-111297014	ENSMMUG00000001909_11:111303768-111303816	ENSG00000111249_12:111291418-111291552	ENSG00000111249_12:111298541-111298589	NA	Macaque	9544
ENSMMUG00000002067_5-3	3	ENSMMUG00000002067_14:110070924-110070969	ENSMMUG00000002067_14:110072121-110072180	ENSG00000167257_11:117238601-117238646	ENSG00000167257_11:117238601-117239860	NA	Macaque	9544
ENSMMUG00000002067_9-3	7	ENSMMUG00000002067_14:110070924-110070969	ENSMMUG00000002067_14:110117308-110117396	ENSG00000167257_11:117238601-117238646	ENSG00000167257_11:117280171-117280259	NA	Macaque	9544
ENSMMUG00000002145_8-3	5	ENSMMUG00000002145_5:128169487-128169572	ENSMMUG00000002145_5:128184982-128185098	ENSG00000077684_4:128842953-128843038	ENSG00000077684_4:128857338-128857454	NA	Macaque	9544
ENSMMUG00000002166_18-9	9	ENSMMUG00000002166_16:56161364-56161459	ENSMMUG00000002166_16:56188617-56188698	ENSG00000146872_17:62552302-62552397	ENSG00000146872_17:62580111-62580192	NA	Macaque	9544
ENSMMUG00000002171_30-29	4	ENSMMUG00000002171_1:9543614-9543792	ENSMMUG00000002171_1:9544493-9544630	ENSG00000054523_1:10323884-10324062	ENSG00000054523_1:10324758-10324895	NA	Macaque	9544
ENSMMUG00000002277_11-10	2	ENSMMUG00000002277_3:165628921-165629034	ENSMMUG00000002277_3:165629562-165629705	ENSG00000157741_7:139273297-139273410	ENSG00000157741_7:139273931-139274074	NA	Macaque	9544
ENSMMUG00000002277_11-2	9	ENSMMUG00000002277_3:165592863-165592955	ENSMMUG00000002277_3:165629562-165629705	ENSG00000157741_7:139237005-139237097	ENSG00000157741_7:139273931-139274074	NA	Macaque	9544
ENSMMUG00000002277_12-8	5	ENSMMUG00000002277_3:165625338-165625467	ENSMMUG00000002277_3:165631721-165631771	ENSG00000157741_7:139269394-139269523	ENSG00000157741_7:139276097-139276147	NA	Macaque	9544
ENSMMUG00000002366_11-6	5	ENSMMUG00000002366_5:91736933-91736986	ENSMMUG00000002366_5:91942537-91942638	ENSG00000152208_4:93207404-93207457	ENSG00000152208_4:93395607-93395708	NA	Macaque	9544
ENSMMUG00000002397_5-4	2	ENSMMUG00000002397_10:58491877-58491967	ENSMMUG00000002397_10:58501139-58501255	ENSG00000101003_20:25418105-25418195	ENSG00000101003_20:25425211-25425327	NA	Macaque	9544
ENSMMUG00000002461_4-4	1	ENSMMUG00000002461_1:112149925-112150336	ENSMMUG00000002461_1:112149925-112150336	ENSG00000134255_1:111147642-111148053	ENSG00000134255_1:111147642-111148053	NA	Macaque	9544
ENSMMUG00000002533_13-7	6	ENSMMUG00000002533_17:53964499-53964607	ENSMMUG00000002533_17:54050326-54050476	ENSG00000083535_13:72827010-72827118	ENSG00000083535_13:72908531-72908681	NA	Macaque	9544
ENSMMUG00000002533_15-7	8	ENSMMUG00000002533_17:53964499-53964607	ENSMMUG00000002533_17:54073419-54073521	ENSG00000083535_13:72827010-72827118	ENSG00000083535_13:72931165-72931267	NA	Macaque	9544
ENSMMUG00000002533_18-7	11	ENSMMUG00000002533_17:53964499-53964607	ENSMMUG00000002533_17:54141021-54141194	ENSG00000083535_13:72827010-72827118	ENSG00000083535_13:72998822-72998995	NA	Macaque	9544
ENSMMUG00000002573_35-29	7	ENSMMUG00000002573_4:26121709-26121837	ENSMMUG00000002573_4:26166391-26166587	ENSG00000079691_6:25537855-25537983	ENSG00000079691_6:25581243-25581439	NA	Macaque	9544
ENSMMUG00000002573_40-25	16	ENSMMUG00000002573_4:26097577-26097749	ENSMMUG00000002573_4:26193973-26194104	ENSG00000079691_6:25515675-25515847	ENSG00000079691_6:25610050-25610181	NA	Macaque	9544
ENSMMUG00000002614_17-11	5	ENSMMUG00000002614_5:19849521-19849592	ENSMMUG00000002614_5:19860618-19860756	ENSG00000145147_4:20480716-20480787	ENSG00000145147_4:20491761-20491899	NA	Macaque	9544
ENSMMUG00000002614_33-25	9	ENSMMUG00000002614_5:19898777-19898851	ENSMMUG00000002614_5:19918368-19918439	ENSG00000145147_4:20531984-20532058	ENSG00000145147_4:20550827-20550898	NA	Macaque	9544
ENSMMUG00000002673_17-11	7	ENSMMUG00000002673_13:87111604-87111672	ENSMMUG00000002673_13:87120677-87120807	ENSG00000115459_2:85368686-85368754	ENSG00000115459_2:85377344-85377474	NA	Macaque	9544
ENSMMUG00000002708_6-5	2	ENSMMUG00000002708_20:18922663-18922715	ENSMMUG00000002708_20:18922850-18922927	ENSG00000174628_16:19763848-19763900	ENSG00000174628_16:19763848-19764112	NA	Macaque	9544
ENSMMUG00000002756_27-15	13	ENSMMUG00000002756_5:38848043-38848149	ENSMMUG00000002756_5:38875208-38875354	ENSG00000157796_4:39217134-39217240	ENSG00000157796_4:39253146-39253292	NA	Macaque	9544
ENSMMUG00000002819_15-13	2	ENSMMUG00000002819_13:74582231-74584095	ENSMMUG00000002819_13:74629945-74630070	ENSG00000116127_2:73489634-73490158	ENSG00000116127_2:73534824-73534949	NA	Macaque	9544
ENSMMUG00000003317_22-20	3	ENSMMUG00000003317_X:45163175-45163304	ENSMMUG00000003317_X:45165590-45165795	ENSG00000147050_X:45076697-45076826	ENSG00000147050_X:45079146-45079351	NA	Macaque	9544
ENSMMUG00000003343_13-5	9	ENSMMUG00000003343_1:34996985-34997150	ENSMMUG00000003343_1:35008056-35008143	ENSG00000134698_1:35816882-35817047	ENSG00000134698_1:35826748-35826835	NA	Macaque	9544
ENSMMUG00000003610_17-10	8	ENSMMUG00000003610_9:100915448-100915566	ENSMMUG00000003610_9:100987417-100987524	ENSG00000156395_10:105105397-105105515	ENSG00000156395_10:105178066-105178173	NA	Macaque	9544
ENSMMUG00000003664_11-3	7	ENSMMUG00000003664_11:15113738-15113824	ENSMMUG00000003664_11:15145524-15145588	ENSG00000171681_12:14434337-14434423	ENSG00000171681_12:14466110-14466590	NA	Macaque	9544
ENSMMUG00000003664_11-5	6	ENSMMUG00000003664_11:15115525-15115670	ENSMMUG00000003664_11:15145524-15145588	ENSG00000171681_12:14436106-14436251	ENSG00000171681_12:14466110-14466590	NA	Macaque	9544
ENSMMUG00000003736_9-4	5	ENSMMUG00000003736_5:101359548-101359626	ENSMMUG00000003736_5:101401132-101401280	ENSG00000109320_4:102529836-102529914	ENSG00000109320_4:102566987-102567135	NA	Macaque	9544
ENSMMUG00000003851_58-55	4	ENSMMUG00000003851_2:45899108-45899211	ENSMMUG00000003851_2:45901028-45901120	ENSG00000160145_3:124657448-124657551	ENSG00000160145_3:124659365-124659457	NA	Macaque	9544
ENSMMUG00000003914_12-3	8	ENSMMUG00000003914_7:111709595-111709665	ENSMMUG00000003914_7:111735444-111735516	ENSG00000197776_14:49709159-49709229	ENSG00000197776_14:49734589-49734661	NA	Macaque	9544
ENSMMUG00000003919_11-8	3	ENSMMUG00000003919_6:174751717-174751949	ENSMMUG00000003919_6:174764843-174764997	ENSG00000170085_5:176295030-176295077	ENSG00000170085_5:176313691-176313845	NA	Macaque	9544
ENSMMUG00000004049_14-5	10	ENSMMUG00000004049_1:136526608-136526737	ENSMMUG00000004049_1:136640476-136640590	ENSG00000118217_1:161791408-161791537	ENSG00000118217_1:161863198-161863312	NA	Macaque	9544
ENSMMUG00000004049_15-5	11	ENSMMUG00000004049_1:136526608-136526737	ENSMMUG00000004049_1:136690327-136690411	ENSG00000118217_1:161791408-161791537	ENSG00000118217_1:161912296-161912380	NA	Macaque	9544
ENSMMUG00000004153_21-12	8	ENSMMUG00000004153_14:101175631-101175800	ENSMMUG00000004153_14:101189908-101190107	ENSG00000149311_11:108248933-108249102	ENSG00000149311_11:108268410-108268609	NA	Macaque	9544
ENSMMUG00000004153_59-22	33	ENSMMUG00000004153_14:101192545-101192627	ENSMMUG00000004153_14:101252725-101252883	ENSG00000149311_11:108271064-108271146	ENSG00000149311_11:108331879-108332037	NA	Macaque	9544
ENSMMUG00000004153_64-56	9	ENSMMUG00000004153_14:101249856-101250073	ENSMMUG00000004153_14:101263890-101264039	ENSG00000149311_11:108329021-108329307	ENSG00000149311_11:108343222-108343371	NA	Macaque	9544
ENSMMUG00000004343_12-10	3	ENSMMUG00000004343_18:12606023-12606116	ENSMMUG00000004343_18:12609528-12609635	ENSG00000168234_18:24114554-24115032	ENSG00000168234_18:24118125-24118232	NA	Macaque	9544
ENSMMUG00000004381_19-9	12	ENSMMUG00000004381_13:26540123-26540167	ENSMMUG00000004381_13:26556317-26556481	ENSG00000138029_2:26269953-26269997	ENSG00000138029_2:26285407-26285571	NA	Macaque	9544
ENSMMUG00000004390_10-8	1	ENSMMUG00000004390_19:12883902-12884030	ENSMMUG00000004390_19:12883902-12884030	ENSG00000179115_19:12928398-12928663	ENSG00000179115_19:12928398-12928663	NA	Macaque	9544
ENSMMUG00000004491_14-2	8	ENSMMUG00000004491_4:73739639-73739732	ENSMMUG00000004491_4:73789889-73790056	ENSG00000112701_6:75621532-75621625	ENSG00000112701_6:75670553-75670720	NA	Macaque	9544
ENSMMUG00000004491_20-2	12	ENSMMUG00000004491_4:73739639-73739732	ENSMMUG00000004491_4:73798184-73798300	ENSG00000112701_6:75621532-75621625	ENSG00000112701_6:75678811-75678927	NA	Macaque	9544
ENSMMUG00000004491_23-23	1	ENSMMUG00000004491_4:73818927-73819354	ENSMMUG00000004491_4:73818927-73819354	ENSG00000112701_6:75702645-75703072	ENSG00000112701_6:75702645-75703072	NA	Macaque	9544
ENSMMUG00000004491_9-2	4	ENSMMUG00000004491_4:73739639-73739732	ENSMMUG00000004491_4:73759392-73759409	ENSG00000112701_6:75621532-75621625	ENSG00000112701_6:75640684-75640704	NA	Macaque	9544
ENSMMUG00000004644_15-7	9	ENSMMUG00000004644_5:158633354-158633435	ENSMMUG00000004644_5:158656222-158656443	ENSG00000171503_4:158684592-158684775	ENSG00000171503_4:158706629-158706850	NA	Macaque	9544
ENSMMUG00000004647_12-9	4	ENSMMUG00000004647_5:158564715-158564786	ENSMMUG00000004647_5:158574305-158574379	ENSG00000171509_4:158607972-158608043	ENSG00000171509_4:158617131-158617205	NA	Macaque	9544
ENSMMUG00000004647_14-9	6	ENSMMUG00000004647_5:158564715-158564786	ENSMMUG00000004647_5:158585794-158585865	ENSG00000171509_4:158607972-158608043	ENSG00000171509_4:158628638-158628709	NA	Macaque	9544
ENSMMUG00000004829_9-5	3	ENSMMUG00000004829_4:78404966-78405099	ENSMMUG00000004829_4:78408209-78408317	ENSG00000083123_6:80167678-80167811	ENSG00000083123_6:80171282-80171390	NA	Macaque	9544
ENSMMUG00000005032_12-5	8	ENSMMUG00000005032_4:73949159-73949228	ENSMMUG00000005032_4:73972842-73972922	ENSG00000196586_6:75822782-75822851	ENSG00000196586_6:75844897-75844977	NA	Macaque	9544
ENSMMUG00000005066_15-8	8	ENSMMUG00000005066_X:18144610-18144770	ENSMMUG00000005066_X:18181230-18181382	ENSG00000086717_X:18749792-18749952	ENSG00000086717_X:18789121-18789273	NA	Macaque	9544
ENSMMUG00000005156_8-8	1	ENSMMUG00000005156_2:51382697-51382897	ENSMMUG00000005156_2:51382697-51382897	ENSG00000177463_3:15013589-15013789	ENSG00000177463_3:15013589-15013789	NA	Macaque	9544
ENSMMUG00000005208_11-3	9	ENSMMUG00000005208_11:106276914-106276946	ENSMMUG00000005208_11:106292107-106292215	ENSG00000013503_12:106363870-106363902	ENSG00000013503_12:106380031-106380139	NA	Macaque	9544
ENSMMUG00000005270_30-20	8	ENSMMUG00000005270_7:9483797-9483965	ENSMMUG00000005270_7:9504879-9505120	ENSG00000198838_15:33579976-33580144	ENSG00000198838_15:33603123-33603364	NA	Macaque	9544
ENSMMUG00000005356_20-15	4	ENSMMUG00000005356_8:93375126-93375267	ENSMMUG00000005356_8:93386353-93386463	ENSG00000164941_8:94842347-94842488	ENSG00000164941_8:94853794-94853915	NA	Macaque	9544
ENSMMUG00000005356_34-6	23	ENSMMUG00000005356_8:93358047-93358221	ENSMMUG00000005356_8:93408986-93409029	ENSG00000164941_8:94824893-94825067	ENSG00000164941_8:94876446-94876489	NA	Macaque	9544
ENSMMUG00000005357_39-31	7	ENSMMUG00000005357_6:65325827-65326035	ENSMMUG00000005357_6:65341005-65341240	ENSG00000069020_5:67130210-67130418	ENSG00000069020_5:67145144-67145379	NA	Macaque	9544
ENSMMUG00000005393_16-2	13	ENSMMUG00000005393_12:105149578-105149636	ENSMMUG00000005393_12:105193184-105193341	ENSG00000123983_2:222887830-222887888	ENSG00000123983_2:222934530-222934687	NA	Macaque	9544
ENSMMUG00000005478_6-3	4	ENSMMUG00000005478_8:53743449-53743621	ENSMMUG00000005478_8:53750327-53750413	ENSG00000137574_8:55785719-55785891	ENSG00000137574_8:55792698-55792784	NA	Macaque	9544
ENSMMUG00000005528_9-5	5	ENSMMUG00000005528_2:135778383-135778575	ENSMMUG00000005528_2:135791037-135791218	ENSG00000163755_3:149145354-149145546	ENSG00000163755_3:149157350-149157531	NA	Macaque	9544
ENSMMUG00000005675_13-4	10	ENSMMUG00000005675_4:43574486-43574745	ENSMMUG00000005675_4:43618931-43619029	ENSG00000024048_6:42573734-42573993	ENSG00000024048_6:42617240-42617338	NA	Macaque	9544
ENSMMUG00000005675_40-34	7	ENSMMUG00000005675_4:43662058-43662257	ENSMMUG00000005675_4:43673310-43673365	ENSG00000024048_6:42659656-42659855	ENSG00000024048_6:42670660-42670715	NA	Macaque	9544
ENSMMUG00000005845_14-8	7	ENSMMUG00000005845_7:164961683-164961735	ENSMMUG00000005845_7:164987184-164987241	ENSG00000089902_14:102701278-102701330	ENSG00000089902_14:102721320-102721377	NA	Macaque	9544
ENSMMUG00000005845_14-9	6	ENSMMUG00000005845_7:164972218-164972379	ENSMMUG00000005845_7:164987184-164987241	ENSG00000089902_14:102707351-102707512	ENSG00000089902_14:102721320-102721377	NA	Macaque	9544
ENSMMUG00000005879_10-10	1	ENSMMUG00000005879_19:30330516-30331549	ENSMMUG00000005879_19:30330516-30331549	ENSG00000166398_19:34341422-34342455	ENSG00000166398_19:34341422-34342455	NA	Macaque	9544
ENSMMUG00000005884_18-13	5	ENSMMUG00000005884_19:30450223-30450316	ENSMMUG00000005884_19:30463106-30463242	ENSG00000126261_19:34454260-34454353	ENSG00000126261_19:34466878-34467014	NA	Macaque	9544
ENSMMUG00000005914_25-25	1	ENSMMUG00000005914_20:15904236-15904443	ENSMMUG00000005914_20:15904236-15904443	ENSG00000103222_16:16111375-16111582	ENSG00000103222_16:16111375-16111582	NA	Macaque	9544
ENSMMUG00000006139_17-5	7	ENSMMUG00000006139_6:72039394-72039505	ENSMMUG00000006139_6:72052312-72052417	ENSG00000113161_5:75343853-75343964	ENSG00000113161_5:75356343-75356448	NA	Macaque	9544
ENSMMUG00000006370_19-16	3	ENSMMUG00000006370_8:83530599-83530762	ENSMMUG00000006370_8:83536384-83536519	ENSG00000133739_8:85137464-85137627	ENSG00000133739_8:85141382-85141517	NA	Macaque	9544
ENSMMUG00000006640_14-8	4	ENSMMUG00000006640_12:82348202-82348286	ENSMMUG00000006640_12:82349058-82349228	ENSG00000013441_2:200856891-200856985	ENSG00000013441_2:200856891-200857884	NA	Macaque	9544
ENSMMUG00000006645_16-7	7	ENSMMUG00000006645_1:23477782-23477952	ENSMMUG00000006645_1:23492367-23492408	ENSG00000133226_1:24646667-24649029	ENSG00000133226_1:24663183-24663224	NA	Macaque	9544
ENSMMUG00000006658_21-4	16	ENSMMUG00000006658_2:171846562-171846670	ENSMMUG00000006658_2:171876809-171876884	ENSG00000131375_3:15212104-15212212	ENSG00000131375_3:15242178-15242253	NA	Macaque	9544
ENSMMUG00000006731_12-4	11	ENSMMUG00000006731_10:59791331-59791425	ENSMMUG00000006731_10:59840880-59841033	ENSG00000099954_22:17477588-17477682	ENSG00000099954_22:17524118-17524271	NA	Macaque	9544
ENSMMUG00000006761_9-6	3	ENSMMUG00000006761_16:74597868-74597954	ENSMMUG00000006761_16:74619864-74620039	ENSG00000141564_17:80730560-80730706	ENSG00000141564_17:80754010-80754185	NA	Macaque	9544
ENSMMUG00000006911_12-8	5	ENSMMUG00000006911_20:18183067-18183214	ENSMMUG00000006911_20:18194078-18194175	ENSG00000170537_16:19035676-19035823	ENSG00000170537_16:19045341-19045438	NA	Macaque	9544
ENSMMUG00000006911_17-7	10	ENSMMUG00000006911_20:18177311-18177456	ENSMMUG00000006911_20:18204660-18204738	ENSG00000170537_16:19030224-19030369	ENSG00000170537_16:19059416-19059494	NA	Macaque	9544
ENSMMUG00000007085_2-2	1	ENSMMUG00000007085_14:106935572-106936929	ENSMMUG00000007085_14:106935572-106936929	ENSG00000109906_11:114063211-114064568	ENSG00000109906_11:114063211-114064568	NA	Macaque	9544
ENSMMUG00000007201_8-6	3	ENSMMUG00000007201_17:12176943-12177029	ENSMMUG00000007201_17:12177867-12177993	ENSG00000083642_13:32658239-32658325	ENSG00000083642_13:32659154-32659280	NA	Macaque	9544
ENSMMUG00000007303_10-2	8	ENSMMUG00000007303_1:124793305-124793434	ENSMMUG00000007303_1:124835930-124836187	ENSG00000163125_1:150417596-150417725	ENSG00000163125_1:150460060-150460317	NA	Macaque	9544
ENSMMUG00000007303_10-3	7	ENSMMUG00000007303_1:124817374-124817474	ENSMMUG00000007303_1:124835930-124836187	ENSG00000163125_1:150440923-150441023	ENSG00000163125_1:150460060-150460317	NA	Macaque	9544
ENSMMUG00000007303_11-10	2	ENSMMUG00000007303_1:124835930-124836187	ENSMMUG00000007303_1:124843267-124843467	ENSG00000163125_1:150460060-150460317	ENSG00000163125_1:150464527-150464727	NA	Macaque	9544
ENSMMUG00000007303_11-2	9	ENSMMUG00000007303_1:124793305-124793434	ENSMMUG00000007303_1:124843267-124843467	ENSG00000163125_1:150417596-150417725	ENSG00000163125_1:150464527-150464727	NA	Macaque	9544
ENSMMUG00000007303_11-9	3	ENSMMUG00000007303_1:124832878-124833160	ENSMMUG00000007303_1:124843267-124843467	ENSG00000163125_1:150457288-150457570	ENSG00000163125_1:150464527-150464727	NA	Macaque	9544
ENSMMUG00000007324_12-8	5	ENSMMUG00000007324_2:142994453-142994646	ENSMMUG00000007324_2:143003325-143003430	ENSG00000163655_3:155910692-155910885	ENSG00000163655_3:155919233-155919338	NA	Macaque	9544
ENSMMUG00000007397_13-9	5	ENSMMUG00000007397_20:32048396-32048537	ENSMMUG00000007397_20:32107158-32107300	ENSG00000102910_16:48277338-48277479	ENSG00000102910_16:48334216-48334358	NA	Macaque	9544
ENSMMUG00000007422_11-10	2	ENSMMUG00000007422_5:121966059-121966213	ENSMMUG00000007422_5:122057834-122058043	ENSG00000145375_4:122979232-122979386	ENSG00000145375_4:123028186-123028395	NA	Macaque	9544
ENSMMUG00000007422_13-10	4	ENSMMUG00000007422_5:121966059-121966213	ENSMMUG00000007422_5:122075780-122075859	ENSG00000145375_4:122979232-122979386	ENSG00000145375_4:123057209-123057288	NA	Macaque	9544
ENSMMUG00000007552_7-3	5	ENSMMUG00000007552_13:69557994-69558166	ENSMMUG00000007552_13:69579415-69579770	ENSG00000169621_2:68502731-68502903	ENSG00000169621_2:68537872-68538227	NA	Macaque	9544
ENSMMUG00000007552_7-6	2	ENSMMUG00000007552_13:69572959-69573140	ENSMMUG00000007552_13:69579415-69579770	ENSG00000169621_2:68526061-68526242	ENSG00000169621_2:68537872-68538227	NA	Macaque	9544
ENSMMUG00000007577_24-19	6	ENSMMUG00000007577_1:64352155-64352271	ENSMMUG00000007577_1:64358686-64358847	ENSG00000158966_1:64673348-64673464	ENSG00000158966_1:64679595-64679756	NA	Macaque	9544
ENSMMUG00000007577_7-6	2	ENSMMUG00000007577_1:64310885-64311029	ENSMMUG00000007577_1:64312320-64312536	ENSG00000158966_1:64632599-64632743	ENSG00000158966_1:64634044-64634260	NA	Macaque	9544
ENSMMUG00000007597_4-4	1	ENSMMUG00000007597_17:10204444-10205083	ENSMMUG00000007597_17:10204444-10205083	ENSG00000132952_13:30630835-30631474	ENSG00000132952_13:30630835-30631474	NA	Macaque	9544
ENSMMUG00000007597_7-3	5	ENSMMUG00000007597_17:10197392-10197520	ENSMMUG00000007597_17:10220299-10220424	ENSG00000132952_13:30621764-30621892	ENSG00000132952_13:30646932-30647057	NA	Macaque	9544
ENSMMUG00000007881_10-4	7	ENSMMUG00000007881_17:20343401-20343463	ENSMMUG00000007881_17:20360808-20360971	ENSG00000120688_13:41065016-41065078	ENSG00000120688_13:41080646-41080809	NA	Macaque	9544
ENSMMUG00000008025_14-7	6	ENSMMUG00000008025_14:86317015-86317110	ENSMMUG00000008025_14:86334115-86334218	ENSG00000166004_11:93675571-93675666	ENSG00000166004_11:93691927-93692030	NA	Macaque	9544
ENSMMUG00000008025_30-16	11	ENSMMUG00000008025_14:86338315-86338412	ENSMMUG00000008025_14:86368804-86368981	ENSG00000166004_11:93696320-93696417	ENSG00000166004_11:93725651-93725831	NA	Macaque	9544
ENSMMUG00000008101_14-11	2	ENSMMUG00000008101_12:81748716-81748962	ENSMMUG00000008101_12:81748716-81748962	ENSG00000196141_2:200419250-200419496	ENSG00000196141_2:200419250-200419496	NA	Macaque	9544
ENSMMUG00000008402_7-5	2	ENSMMUG00000008402_1:125567249-125567416	ENSMMUG00000008402_1:125574273-125574423	ENSG00000143458_1:151090406-151090573	ENSG00000143458_1:151097852-151098002	NA	Macaque	9544
ENSMMUG00000008438_4-4	1	ENSMMUG00000008438_8:78751295-78752183	ENSMMUG00000008438_8:78751295-78752183	ENSG00000205189_8:80499494-80500382	ENSG00000205189_8:80499494-80500382	NA	Macaque	9544
ENSMMUG00000008502_11-4	8	ENSMMUG00000008502_12:64462276-64462365	ENSMMUG00000008502_12:64503663-64503788	ENSG00000018510_2:177420269-177420358	ENSG00000018510_2:177461893-177462018	NA	Macaque	9544
ENSMMUG00000008605_13-11	3	ENSMMUG00000008605_16:25267925-25267992	ENSMMUG00000008605_16:25269339-25269496	ENSG00000196712_17:31181422-31181489	ENSG00000196712_17:31182508-31182665	NA	Macaque	9544
ENSMMUG00000008605_18-10	8	ENSMMUG00000008605_16:25256251-25256357	ENSMMUG00000008605_16:25295538-25295669	ENSG00000196712_17:31169891-31169997	ENSG00000196712_17:31206240-31206371	NA	Macaque	9544
ENSMMUG00000008605_44-14	28	ENSMMUG00000008605_16:25289680-25289853	ENSMMUG00000008605_16:25351661-25351771	ENSG00000196712_17:31200422-31200595	ENSG00000196712_17:31265229-31265339	NA	Macaque	9544
ENSMMUG00000008611_18-12	7	ENSMMUG00000008611_12:37991555-37991731	ENSMMUG00000008611_12:37998057-37998237	ENSG00000080345_2:151436827-151437003	ENSG00000080345_2:151443529-151443709	NA	Macaque	9544
ENSMMUG00000008690_2-2	1	ENSMMUG00000008690_9:57180845-57181437	ENSMMUG00000008690_9:57180845-57181437	ENSG00000156671_10:75150514-75151106	ENSG00000156671_10:75150514-75151106	NA	Macaque	9544
ENSMMUG00000008705_13-9	4	ENSMMUG00000008705_5:118240098-118240247	ENSMMUG00000008705_5:118250010-118250748	ENSG00000145390_4:119261715-119261864	ENSG00000145390_4:119271296-119272034	NA	Macaque	9544
ENSMMUG00000008792_10-7	4	ENSMMUG00000008792_7:138608208-138608272	ENSMMUG00000008792_7:138618204-138618271	ENSG00000089916_14:76166663-76166727	ENSG00000089916_14:76173546-76176690	NA	Macaque	9544
ENSMMUG00000008795_12-11	2	ENSMMUG00000008795_5:86422973-86423094	ENSMMUG00000008795_5:86423362-86423479	ENSG00000118762_4:88065374-88065879	ENSG00000118762_4:88065374-88065879	NA	Macaque	9544
ENSMMUG00000008873_6-3	2	ENSMMUG00000008873_9:99148099-99148154	ENSMMUG00000008873_9:99149409-99149505	ENSG00000156374_10:103347395-103347450	ENSG00000156374_10:103348355-103348812	NA	Macaque	9544
ENSMMUG00000008886_12-8	5	ENSMMUG00000008886_7:68723344-68723444	ENSMMUG00000008886_7:68743609-68743826	ENSG00000140577_15:90607378-90607478	ENSG00000140577_15:90625776-90625993	NA	Macaque	9544
ENSMMUG00000009036_14-7	8	ENSMMUG00000009036_2:141154538-141154594	ENSMMUG00000009036_2:141246115-141246324	ENSG00000114790_3:154149389-154149445	ENSG00000114790_3:154240370-154240579	NA	Macaque	9544
ENSMMUG00000009060_24-5	18	ENSMMUG00000009060_4:68577477-68577616	ENSMMUG00000009060_4:68642078-68642188	ENSG00000082269_6:70475410-70475549	ENSG00000082269_6:70538291-70538401	NA	Macaque	9544
ENSMMUG00000009236_12-5	7	ENSMMUG00000009236_11:106673758-106673805	ENSMMUG00000009236_11:106754466-106754610	ENSG00000111785_12:106783997-106784044	ENSG00000111785_12:106860268-106860412	NA	Macaque	9544
ENSMMUG00000009339_12-5	8	ENSMMUG00000009339_9:84085556-84085773	ENSMMUG00000009339_9:84103246-84103345	ENSG00000138134_10:88905443-88905660	ENSG00000138134_10:88922337-88922436	NA	Macaque	9544
ENSMMUG00000009367_13-13	1	ENSMMUG00000009367_13:32901511-32902905	ENSMMUG00000009367_13:32901511-32902905	ENSG00000115760_2:32414769-32416163	ENSG00000115760_2:32414769-32416163	NA	Macaque	9544
ENSMMUG00000009372_11-3	7	ENSMMUG00000009372_13:33119725-33119854	ENSMMUG00000009372_13:33179739-33179852	ENSG00000018699_2:32633876-32634005	ENSG00000018699_2:32702807-32702920	NA	Macaque	9544
ENSMMUG00000009372_14-8	4	ENSMMUG00000009372_13:33159242-33159354	ENSMMUG00000009372_13:33211978-33212100	ENSG00000018699_2:32672272-32672384	ENSG00000018699_2:32736694-32736816	NA	Macaque	9544
ENSMMUG00000009520_19-13	8	ENSMMUG00000009520_7:129043643-129043709	ENSMMUG00000009520_7:129153012-129153054	ENSG00000171723_14:66916003-66916069	ENSG00000171723_14:67023633-67023675	NA	Macaque	9544
ENSMMUG00000009520_19-5	14	ENSMMUG00000009520_7:128902821-128902878	ENSMMUG00000009520_7:129153012-129153054	ENSG00000171723_14:66776464-66776521	ENSG00000171723_14:67023633-67023675	NA	Macaque	9544
ENSMMUG00000009520_29-24	6	ENSMMUG00000009520_7:129249137-129249256	ENSMMUG00000009520_7:129296243-129296316	ENSG00000171723_14:67110140-67110287	ENSG00000171723_14:67159415-67159488	NA	Macaque	9544
ENSMMUG00000009558_15-7	9	ENSMMUG00000009558_9:115765756-115765954	ENSMMUG00000009558_9:115780079-115780277	ENSG00000198825_10:119796715-119796913	ENSG00000198825_10:119811757-119811955	NA	Macaque	9544
ENSMMUG00000009585_19-15	5	ENSMMUG00000009585_4:82125714-82125854	ENSMMUG00000009585_4:82146665-82146829	ENSG00000065615_6:83934595-83934735	ENSG00000065615_6:83955298-83955462	NA	Macaque	9544
ENSMMUG00000009765_35-9	24	ENSMMUG00000009765_2:200378193-200378300	ENSMMUG00000009765_2:200428618-200428728	ENSG00000198836_3:193617178-193617285	ENSG00000198836_3:193667170-193667280	NA	Macaque	9544
ENSMMUG00000009839_14-8	3	ENSMMUG00000009839_7:25593180-25593278	ENSMMUG00000009839_7:25631361-25631562	ENSG00000156958_15:49281987-49282085	ENSG00000156958_15:49319604-49319805	NA	Macaque	9544
ENSMMUG00000010066_17-10	6	ENSMMUG00000010066_13:107032752-107032905	ENSMMUG00000010066_13:107039968-107040053	ENSG00000153208_2:111994251-111994404	ENSG00000153208_2:112001201-112001286	NA	Macaque	9544
ENSMMUG00000010073_24-8	16	ENSMMUG00000010073_1:213189203-213189309	ENSMMUG00000010073_1:213241545-213241645	ENSG00000116984_1:236812738-236812844	ENSG00000116984_1:236863454-236863554	NA	Macaque	9544
ENSMMUG00000010168_14-11	3	ENSMMUG00000010168_7:18128452-18128678	ENSMMUG00000010168_7:18137638-18138155	ENSG00000174197_15:41727180-41727406	ENSG00000174197_15:41736181-41736698	NA	Macaque	9544
ENSMMUG00000010168_14-4	8	ENSMMUG00000010168_7:18104503-18104581	ENSMMUG00000010168_7:18137638-18138155	ENSG00000174197_15:41698863-41698941	ENSG00000174197_15:41736181-41736698	NA	Macaque	9544
ENSMMUG00000010168_14-7	6	ENSMMUG00000010168_7:18113858-18113989	ENSMMUG00000010168_7:18137638-18138155	ENSG00000174197_15:41707728-41707859	ENSG00000174197_15:41736181-41736698	NA	Macaque	9544
ENSMMUG00000010168_2-1	2	ENSMMUG00000010168_7:18077958-18078364	ENSMMUG00000010168_7:18078521-18079088	ENSG00000174197_15:41668828-41669958	ENSG00000174197_15:41668828-41669958	NA	Macaque	9544
ENSMMUG00000010315_8-6	3	ENSMMUG00000010315_7:116705386-116705649	ENSMMUG00000010315_7:116720442-116720528	ENSG00000020577_14:54737024-54737287	ENSG00000020577_14:54751451-54751537	NA	Macaque	9544
ENSMMUG00000010598_14-7	7	ENSMMUG00000010598_X:16343460-16343608	ENSMMUG00000010598_X:16383225-16383319	ENSG00000169891_X:17022123-17022371	ENSG00000169891_X:17062438-17062532	NA	Macaque	9544
ENSMMUG00000010633_3-3	1	ENSMMUG00000010633_10:28256872-28257043	ENSMMUG00000010633_10:28256872-28257043	ENSG00000025293_20:35842573-35842744	ENSG00000025293_20:35842573-35842744	NA	Macaque	9544
ENSMMUG00000010860_15-5	10	ENSMMUG00000010860_7:106980020-106980279	ENSMMUG00000010860_7:107022205-107022363	ENSG00000198718_14:45006008-45006267	ENSG00000198718_14:45046545-45046703	NA	Macaque	9544
ENSMMUG00000010911_6-5	2	ENSMMUG00000010911_18:43540697-43540861	ENSMMUG00000010911_18:43544459-43544611	ENSG00000101751_18:54273926-54274090	ENSG00000101751_18:54277703-54277855	NA	Macaque	9544
ENSMMUG00000010933_17-10	7	ENSMMUG00000010933_11:1199660-1199797	ENSMMUG00000010933_11:1320788-1320948	ENSG00000082805_12:1180540-1180677	ENSG00000082805_12:1289852-1290012	NA	Macaque	9544
ENSMMUG00000010933_17-17	1	ENSMMUG00000010933_11:1320788-1320948	ENSMMUG00000010933_11:1320788-1320948	ENSG00000082805_12:1289852-1290012	ENSG00000082805_12:1289852-1290012	NA	Macaque	9544
ENSMMUG00000010933_18-10	8	ENSMMUG00000010933_11:1199660-1199797	ENSMMUG00000010933_11:1416663-1416807	ENSG00000082805_12:1180540-1180677	ENSG00000082805_12:1371833-1371977	NA	Macaque	9544
ENSMMUG00000011062_14-6	7	ENSMMUG00000011062_5:97685252-97685364	ENSMMUG00000011062_5:97710068-97710133	ENSG00000164024_4:99034230-99034342	ENSG00000164024_4:99057753-99057818	NA	Macaque	9544
ENSMMUG00000011155_15-13	3	ENSMMUG00000011155_7:67288104-67288196	ENSMMUG00000011155_7:67291762-67291942	ENSG00000140525_15:89273377-89273469	ENSG00000140525_15:89276711-89276891	NA	Macaque	9544
ENSMMUG00000011161_23-12	11	ENSMMUG00000011161_2:42402479-42402633	ENSMMUG00000011161_2:42461286-42461357	ENSG00000145087_3:121223003-121223157	ENSG00000145087_3:121282266-121282337	NA	Macaque	9544
ENSMMUG00000011161_24-11	14	ENSMMUG00000011161_2:42329769-42329847	ENSMMUG00000011161_2:42488748-42488813	ENSG00000145087_3:121205923-121206001	ENSG00000145087_3:121318475-121318540	NA	Macaque	9544
ENSMMUG00000011161_24-12	13	ENSMMUG00000011161_2:42402479-42402633	ENSMMUG00000011161_2:42488748-42488813	ENSG00000145087_3:121223003-121223157	ENSG00000145087_3:121318475-121318540	NA	Macaque	9544
ENSMMUG00000011170_17-8	10	ENSMMUG00000011170_3:94598399-94598640	ENSMMUG00000011170_3:94661353-94661570	ENSG00000048052_7:18585281-18585522	ENSG00000048052_7:18648466-18648683	NA	Macaque	9544
ENSMMUG00000011170_18-15	6	ENSMMUG00000011170_3:94657527-94657649	ENSMMUG00000011170_3:94678774-94679037	ENSG00000048052_7:18644671-18644793	ENSG00000048052_7:18666213-18666476	NA	Macaque	9544
ENSMMUG00000011170_18-18	3	ENSMMUG00000011170_3:94678774-94679037	ENSMMUG00000011170_3:94678774-94679037	ENSG00000048052_7:18666213-18666476	ENSG00000048052_7:18666213-18666476	NA	Macaque	9544
ENSMMUG00000011170_25-15	11	ENSMMUG00000011170_3:94657527-94657649	ENSMMUG00000011170_3:94804643-94804750	ENSG00000048052_7:18644671-18644793	ENSG00000048052_7:18793159-18793452	NA	Macaque	9544
ENSMMUG00000011214_18-4	15	ENSMMUG00000011214_6:125766563-125766682	ENSMMUG00000011214_6:125809334-125809445	ENSG00000064651_5:128112814-128112933	ENSG00000064651_5:128157988-128158164	NA	Macaque	9544
ENSMMUG00000011245_2-2	1	ENSMMUG00000011245_20:69553747-69554060	ENSMMUG00000011245_20:69553747-69554060	ENSG00000103196_16:84838422-84838735	ENSG00000103196_16:84838422-84838735	NA	Macaque	9544
ENSMMUG00000011251_30-24	12	ENSMMUG00000011251_7:63635805-63635859	ENSMMUG00000011251_7:63663084-63663150	ENSG00000170776_15:85682158-85682212	ENSG00000170776_15:85710443-85710645	NA	Macaque	9544
ENSMMUG00000011305_13-6	9	ENSMMUG00000011305_11:81831295-81831865	ENSMMUG00000011305_11:82012200-82012281	ENSG00000179104_12:82857010-82857580	ENSG00000179104_12:83030798-83030879	NA	Macaque	9544
ENSMMUG00000011305_6-6	2	ENSMMUG00000011305_11:81831295-81831865	ENSMMUG00000011305_11:81831224-81831865	ENSG00000179104_12:82857010-82857580	ENSG00000179104_12:82857010-82857580	NA	Macaque	9544
ENSMMUG00000011305_7-7	1	ENSMMUG00000011305_11:81876352-81877180	ENSMMUG00000011305_11:81876352-81877180	ENSG00000179104_12:82895818-82896646	ENSG00000179104_12:82895818-82896646	NA	Macaque	9544
ENSMMUG00000011369_2-2	1	ENSMMUG00000011369_15:110280937-110281099	ENSMMUG00000011369_15:110280937-110281099	ENSG00000130956_9:96458379-96458541	ENSG00000130956_9:96458379-96458541	NA	Macaque	9544
ENSMMUG00000011390_4-2	3	ENSMMUG00000011390_1:27641253-27641335	ENSMMUG00000011390_1:27644307-27644410	ENSG00000162419_1:28690074-28690186	ENSG00000162419_1:28692942-28693045	NA	Macaque	9544
ENSMMUG00000011390_8-2	7	ENSMMUG00000011390_1:27641253-27641335	ENSMMUG00000011390_1:27661410-27661532	ENSG00000162419_1:28690074-28690186	ENSG00000162419_1:28710520-28710642	NA	Macaque	9544
ENSMMUG00000011590_11-8	4	ENSMMUG00000011590_17:20600096-20600215	ENSMMUG00000011590_17:20626301-20626373	ENSG00000172766_13:41328724-41328843	ENSG00000172766_13:41355144-41355216	NA	Macaque	9544
ENSMMUG00000011590_20-10	8	ENSMMUG00000011590_17:20608730-20608836	ENSMMUG00000011590_17:20644933-20645076	ENSG00000172766_13:41336650-41336756	ENSG00000172766_13:41373637-41373780	NA	Macaque	9544
ENSMMUG00000011590_9-4	6	ENSMMUG00000011590_17:20589622-20589726	ENSMMUG00000011590_17:20603031-20603126	ENSG00000172766_13:41318806-41318910	ENSG00000172766_13:41331274-41331369	NA	Macaque	9544
ENSMMUG00000011638_16-14	2	ENSMMUG00000011638_12:45371003-45371191	ENSMMUG00000011638_12:45373322-45373541	ENSG00000144283_2:158631753-158631941	ENSG00000144283_2:158634070-158634289	NA	Macaque	9544
ENSMMUG00000011699_13-9	5	ENSMMUG00000011699_7:45076659-45076732	ENSMMUG00000011699_7:45093763-45093905	ENSG00000033800_15:68164731-68164804	ENSG00000033800_15:68181211-68181354	NA	Macaque	9544
ENSMMUG00000011775_11-6	6	ENSMMUG00000011775_12:113658210-113658380	ENSMMUG00000011775_12:113682800-113682898	ENSG00000135931_2:231214831-231215001	ENSG00000135931_2:231239943-231240041	NA	Macaque	9544
ENSMMUG00000011775_17-6	10	ENSMMUG00000011775_12:113658210-113658380	ENSMMUG00000011775_12:113705131-113705223	ENSG00000135931_2:231214831-231215001	ENSG00000135931_2:231262306-231262398	NA	Macaque	9544
ENSMMUG00000011775_26-6	19	ENSMMUG00000011775_12:113658210-113658380	ENSMMUG00000011775_12:113744542-113744597	ENSG00000135931_2:231214831-231215001	ENSG00000135931_2:231293820-231296253	NA	Macaque	9544
ENSMMUG00000011782_39-35	5	ENSMMUG00000011782_7:71279020-71279160	ENSMMUG00000011782_7:71291487-71291700	ENSG00000173575_15:93002177-93002317	ENSG00000173575_15:93014696-93014909	NA	Macaque	9544
ENSMMUG00000011782_39-39	1	ENSMMUG00000011782_7:71291487-71291700	ENSMMUG00000011782_7:71291487-71291700	ENSG00000173575_15:93014696-93014909	ENSG00000173575_15:93014696-93014909	NA	Macaque	9544
ENSMMUG00000011790_11-2	8	ENSMMUG00000011790_19:29039845-29039979	ENSMMUG00000011790_19:29057302-29057506	ENSG00000076650_19:33088134-33088268	ENSG00000076650_19:33106695-33106899	NA	Macaque	9544
ENSMMUG00000011790_5-2	4	ENSMMUG00000011790_19:29039845-29039979	ENSMMUG00000011790_19:29046506-29046603	ENSG00000076650_19:33088134-33088268	ENSG00000076650_19:33094172-33094269	NA	Macaque	9544
ENSMMUG00000011924_10-8	3	ENSMMUG00000011924_16:71877452-71877667	ENSMMUG00000011924_16:71884497-71884577	ENSG00000078687_17:78064722-78064937	ENSG00000078687_17:78071085-78071165	NA	Macaque	9544
ENSMMUG00000011956_10-8	3	ENSMMUG00000011956_9:12834821-12834959	ENSMMUG00000011956_9:12864717-12864792	ENSG00000183049_10:12760948-12761086	ENSG00000183049_10:12791158-12791233	NA	Macaque	9544
ENSMMUG00000011974_7-2	6	ENSMMUG00000011974_6:108762993-108763071	ENSMMUG00000011974_6:108867652-108867726	ENSG00000152495_5:111344024-111344102	ENSG00000152495_5:111449129-111449203	NA	Macaque	9544
ENSMMUG00000012033_12-8	4	ENSMMUG00000012033_2:203486915-203487022	ENSMMUG00000012033_2:203491569-203491632	ENSG00000180370_3:196806579-196806686	ENSG00000180370_3:196810590-196810653	NA	Macaque	9544
ENSMMUG00000012065_23-9	12	ENSMMUG00000012065_7:138106997-138107066	ENSMMUG00000012065_7:138152636-138152698	ENSG00000119685_14:75707018-75707087	ENSG00000119685_14:75752893-75752955	NA	Macaque	9544
ENSMMUG00000012065_27-25	3	ENSMMUG00000012065_7:138164041-138164198	ENSMMUG00000012065_7:138206239-138206359	ENSG00000119685_14:75764615-75764772	ENSG00000119685_14:75771734-75771854	NA	Macaque	9544
ENSMMUG00000012065_34-9	23	ENSMMUG00000012065_7:138106997-138107066	ENSMMUG00000012065_7:138227045-138227232	ENSG00000119685_14:75707018-75707087	ENSG00000119685_14:75792913-75793100	NA	Macaque	9544
ENSMMUG00000012065_36-35	2	ENSMMUG00000012065_7:138251391-138251545	ENSMMUG00000012065_7:138294565-138294760	ENSG00000119685_14:75820007-75820161	ENSG00000119685_14:75863667-75863862	NA	Macaque	9544
ENSMMUG00000012071_13-2	11	ENSMMUG00000012071_16:49270840-49270925	ENSMMUG00000012071_16:49282569-49282716	ENSG00000067596_17:43489449-43489534	ENSG00000067596_17:43499956-43500103	NA	Macaque	9544
ENSMMUG00000012175_14-5	5	ENSMMUG00000012175_5:185112343-185112472	ENSMMUG00000012175_5:185135186-185135294	ENSG00000164306_4:184661774-184661903	ENSG00000164306_4:184685576-184685684	NA	Macaque	9544
ENSMMUG00000012332_11-6	6	ENSMMUG00000012332_17:80951275-80951394	ENSMMUG00000012332_17:81076973-81077095	ENSG00000134882_13:99243832-99243951	ENSG00000134882_13:99367787-99367906	NA	Macaque	9544
ENSMMUG00000012564_13-6	6	ENSMMUG00000012564_11:129100808-129100859	ENSMMUG00000012564_11:129131411-129131460	ENSG00000151948_12:128899236-128899293	ENSG00000151948_12:128927105-128927154	NA	Macaque	9544
ENSMMUG00000012726_9-5	5	ENSMMUG00000012726_7:93033037-93033127	ENSMMUG00000012726_7:93210604-93210689	ENSG00000151413_14:31599289-31599379	ENSG00000151413_14:31826629-31826714	NA	Macaque	9544
ENSMMUG00000012727_20-7	14	ENSMMUG00000012727_2:50726244-50726320	ENSMMUG00000012727_2:50761230-50761283	ENSG00000163913_3:129461228-129461304	ENSG00000163913_3:129492141-129492194	NA	Macaque	9544
ENSMMUG00000012871_15-4	12	ENSMMUG00000012871_X:71804772-71805261	ENSMMUG00000012871_X:71837643-71837777	ENSG00000165240_X:77988242-77988731	ENSG00000165240_X:78020945-78021079	NA	Macaque	9544
ENSMMUG00000012916_23-19	5	ENSMMUG00000012916_18:46220324-46220412	ENSMMUG00000012916_18:46276129-46276242	ENSG00000091157_18:56758865-56758953	ENSG00000091157_18:56816031-56816144	NA	Macaque	9544
ENSMMUG00000013106_9-2	6	ENSMMUG00000013106_5:173415811-173416271	ENSMMUG00000013106_5:173472072-173472194	ENSG00000109586_4:173247980-173248440	ENSG00000109586_4:173303996-173304118	NA	Macaque	9544
ENSMMUG00000013119_12-7	3	ENSMMUG00000013119_1:208005675-208005804	ENSMMUG00000013119_1:208035469-208035571	ENSG00000270106_1:231767140-231767269	ENSG00000270106_1:231800108-231800210	NA	Macaque	9544
ENSMMUG00000013128_17-14	3	ENSMMUG00000013128_1:41915309-41915518	ENSMMUG00000013128_1:41947233-41947345	ENSG00000186409_1:42577020-42577229	ENSG00000186409_1:42608777-42611090	NA	Macaque	9544
ENSMMUG00000013138_12-9	3	ENSMMUG00000013138_17:92857898-92857986	ENSMMUG00000013138_17:92869386-92869481	ENSG00000102606_13:111233205-111233293	ENSG00000102606_13:111244199-111244294	NA	Macaque	9544
ENSMMUG00000013149_11-7	5	ENSMMUG00000013149_8:45148710-45148797	ENSMMUG00000013149_8:45171082-45171234	ENSG00000164808_8:47700403-47700490	ENSG00000164808_8:47713489-47713641	NA	Macaque	9544
ENSMMUG00000013247_19-5	13	ENSMMUG00000013247_12:109864958-109865051	ENSMMUG00000013247_12:109927335-109927426	ENSG00000173744_2:227491547-227491640	ENSG00000173744_2:227553704-227553795	NA	Macaque	9544
ENSMMUG00000013338_20-8	10	ENSMMUG00000013338_20:18731164-18731188	ENSMMUG00000013338_20:18767313-18767406	ENSG00000103544_16:19575098-19575122	ENSG00000103544_16:19610322-19610415	NA	Macaque	9544
ENSMMUG00000013338_22-10	11	ENSMMUG00000013338_20:18735133-18735209	ENSMMUG00000013338_20:18773629-18773751	ENSG00000103544_16:19579052-19579128	ENSG00000103544_16:19616686-19616808	NA	Macaque	9544
ENSMMUG00000013338_22-13	9	ENSMMUG00000013338_20:18748696-18748780	ENSMMUG00000013338_20:18773629-18773751	ENSG00000103544_16:19591790-19591874	ENSG00000103544_16:19616686-19616808	NA	Macaque	9544
ENSMMUG00000013338_28-25	4	ENSMMUG00000013338_20:18785888-18786004	ENSMMUG00000013338_20:18794868-18794930	ENSG00000103544_16:19628637-19628753	ENSG00000103544_16:19637594-19637656	NA	Macaque	9544
ENSMMUG00000013338_28-8	17	ENSMMUG00000013338_20:18731164-18731188	ENSMMUG00000013338_20:18794868-18794930	ENSG00000103544_16:19575098-19575122	ENSG00000103544_16:19637594-19637656	NA	Macaque	9544
ENSMMUG00000013338_36-31	6	ENSMMUG00000013338_20:18802110-18802173	ENSMMUG00000013338_20:18839962-18840127	ENSG00000103544_16:19644886-19644949	ENSG00000103544_16:19682225-19682390	NA	Macaque	9544
ENSMMUG00000013338_37-31	7	ENSMMUG00000013338_20:18802110-18802173	ENSMMUG00000013338_20:18849053-18849171	ENSG00000103544_16:19644886-19644949	ENSG00000103544_16:19691353-19691471	NA	Macaque	9544
ENSMMUG00000013367_20-11	9	ENSMMUG00000013367_17:1103704-1103806	ENSMMUG00000013367_17:1134864-1135014	ENSG00000032742_13:20598651-20598753	ENSG00000032742_13:20643455-20643605	NA	Macaque	9544
ENSMMUG00000013367_21-18	4	ENSMMUG00000013367_17:1129916-1130102	ENSMMUG00000013367_17:1136247-1136362	ENSG00000032742_13:20638332-20638518	ENSG00000032742_13:20644843-20644958	NA	Macaque	9544
ENSMMUG00000013367_23-17	7	ENSMMUG00000013367_17:1123810-1123896	ENSMMUG00000013367_17:1153894-1153959	ENSG00000032742_13:20631016-20631102	ENSG00000032742_13:20656365-20656430	NA	Macaque	9544
ENSMMUG00000013473_11-7	5	ENSMMUG00000013473_17:28729219-28729782	ENSMMUG00000013473_17:28736235-28736334	ENSG00000136169_13:49476476-49477039	ENSG00000136169_13:49483464-49483563	NA	Macaque	9544
ENSMMUG00000013473_14-3	12	ENSMMUG00000013473_17:28707583-28707708	ENSMMUG00000013473_17:28743698-28743786	ENSG00000136169_13:49460107-49460232	ENSG00000136169_13:49490822-49490910	NA	Macaque	9544
ENSMMUG00000013473_14-6	9	ENSMMUG00000013473_17:28715202-28715298	ENSMMUG00000013473_17:28743698-28743786	ENSG00000136169_13:49467864-49467960	ENSG00000136169_13:49490822-49490910	NA	Macaque	9544
ENSMMUG00000013645_8-6	3	ENSMMUG00000013645_3:165493839-165493888	ENSMMUG00000013645_3:165501266-165501437	ENSG00000105948_7:139142256-139142305	ENSG00000105948_7:139148206-139148377	NA	Macaque	9544
ENSMMUG00000013670_16-3	13	ENSMMUG00000013670_7:62079786-62079905	ENSMMUG00000013670_7:62295179-62295263	ENSG00000156218_15:83704389-83704508	ENSG00000156218_15:83899647-83899731	NA	Macaque	9544
ENSMMUG00000013670_26-23	4	ENSMMUG00000013670_7:62384548-62385619	ENSMMUG00000013670_7:62394955-62395083	ENSG00000156218_15:83982273-83983344	ENSG00000156218_15:83991086-83991214	NA	Macaque	9544
ENSMMUG00000013670_7-5	3	ENSMMUG00000013670_7:62156157-62156284	ENSMMUG00000013670_7:62212665-62212901	ENSG00000156218_15:83773523-83773650	ENSG00000156218_15:83819811-83820047	NA	Macaque	9544
ENSMMUG00000013713_14-10	5	ENSMMUG00000013713_17:10817227-10817290	ENSMMUG00000013713_17:10831888-10831987	ENSG00000187676_13:31269214-31269277	ENSG00000187676_13:31286720-31286819	NA	Macaque	9544
ENSMMUG00000013848_10-10	1	ENSMMUG00000013848_7:127663380-127663494	ENSMMUG00000013848_7:127663380-127663494	ENSG00000033170_14:65629492-65629606	ENSG00000033170_14:65629492-65629606	NA	Macaque	9544
ENSMMUG00000014013_23-21	3	ENSMMUG00000014013_1:95139185-95139276	ENSMMUG00000014013_1:95140643-95140706	ENSG00000117528_1:94489725-94489816	ENSG00000117528_1:94491184-94491247	NA	Macaque	9544
ENSMMUG00000014013_27-21	7	ENSMMUG00000014013_1:95139185-95139276	ENSMMUG00000014013_1:95148722-95148841	ENSG00000117528_1:94489725-94489816	ENSG00000117528_1:94499495-94499614	NA	Macaque	9544
ENSMMUG00000014039_6-5	2	ENSMMUG00000014039_16:9731619-9731754	ENSMMUG00000014039_16:9735034-9735169	ENSG00000154914_17:9676746-9676881	ENSG00000154914_17:9680231-9680366	NA	Macaque	9544
ENSMMUG00000014318_20-16	4	ENSMMUG00000014318_12:77317220-77317448	ENSMMUG00000014318_12:77321258-77321388	ENSG00000064933_2:189863743-189864228	ENSG00000064933_2:189867799-189867929	NA	Macaque	9544
ENSMMUG00000014423_20-15	5	ENSMMUG00000014423_8:65254088-65254181	ENSMMUG00000014423_8:65261093-65261171	ENSG00000104218_8:67111972-67112075	ENSG00000104218_8:67118743-67118821	NA	Macaque	9544
ENSMMUG00000014423_22-14	8	ENSMMUG00000014423_8:65248048-65248118	ENSMMUG00000014423_8:65279709-65279856	ENSG00000104218_8:67105905-67105975	ENSG00000104218_8:67137456-67137603	NA	Macaque	9544
ENSMMUG00000014423_30-19	11	ENSMMUG00000014423_8:65260604-65260725	ENSMMUG00000014423_8:65310884-65311023	ENSG00000104218_8:67118248-67118369	ENSG00000104218_8:67172416-67172555	NA	Macaque	9544
ENSMMUG00000014423_30-23	7	ENSMMUG00000014423_8:65291047-65291199	ENSMMUG00000014423_8:65310884-65311023	ENSG00000104218_8:67149783-67149935	ENSG00000104218_8:67172416-67172555	NA	Macaque	9544
ENSMMUG00000014423_30-24	6	ENSMMUG00000014423_8:65295241-65295353	ENSMMUG00000014423_8:65310884-65311023	ENSG00000104218_8:67154024-67154136	ENSG00000104218_8:67172416-67172555	NA	Macaque	9544
ENSMMUG00000014423_33-6	26	ENSMMUG00000014423_8:65216530-65216638	ENSMMUG00000014423_8:65318789-65318852	ENSG00000104218_8:67074243-67074351	ENSG00000104218_8:67179863-67179926	NA	Macaque	9544
ENSMMUG00000014442_16-12	6	ENSMMUG00000014442_8:22441785-22441910	ENSMMUG00000014442_8:22447349-22447446	ENSG00000120910_8:22527392-22527517	ENSG00000120910_8:22532921-22533018	NA	Macaque	9544
ENSMMUG00000014442_16-8	8	ENSMMUG00000014442_8:22437462-22437534	ENSMMUG00000014442_8:22447349-22447446	ENSG00000120910_8:22522491-22522568	ENSG00000120910_8:22532921-22533018	NA	Macaque	9544
ENSMMUG00000014482_27-11	15	ENSMMUG00000014482_7:44438690-44438754	ENSMMUG00000014482_7:44607003-44607048	ENSG00000137764_15:67600685-67600749	ENSG00000137764_15:67772707-67772752	NA	Macaque	9544
ENSMMUG00000014677_21-11	10	ENSMMUG00000014677_19:10837991-10838058	ENSMMUG00000014677_19:10853726-10853839	ENSG00000079805_19:10795372-10795439	ENSG00000079805_19:10808519-10812377	NA	Macaque	9544
ENSMMUG00000014814_17-13	5	ENSMMUG00000014814_12:86915018-86915188	ENSMMUG00000014814_12:86984574-86984618	ENSG00000116117_2:205172211-205172381	ENSG00000116117_2:205245778-205245822	NA	Macaque	9544
ENSMMUG00000014853_19-9	7	ENSMMUG00000014853_11:69075591-69075738	ENSMMUG00000014853_11:69092274-69092418	ENSG00000111596_12:70329423-70329570	ENSG00000111596_12:70346180-70346324	NA	Macaque	9544
ENSMMUG00000014880_9-4	6	ENSMMUG00000014880_14:114350808-114350933	ENSMMUG00000014880_14:114385740-114385909	ENSG00000137642_11:121478118-121478243	ENSG00000137642_11:121514152-121514321	NA	Macaque	9544
ENSMMUG00000014884_6-3	2	ENSMMUG00000014884_7:26784861-26785005	ENSMMUG00000014884_7:26802756-26802918	ENSG00000138592_15:50441349-50441463	ENSG00000138592_15:50459000-50459162	NA	Macaque	9544
ENSMMUG00000014953_14-7	7	ENSMMUG00000014953_5:147732392-147732502	ENSMMUG00000014953_5:147777481-147777546	ENSG00000071205_4:147864846-147864956	ENSG00000071205_4:147913074-147913139	NA	Macaque	9544
ENSMMUG00000014953_20-8	12	ENSMMUG00000014953_5:147734236-147734340	ENSMMUG00000014953_5:147829128-147829287	ENSG00000071205_4:147866712-147866816	ENSG00000071205_4:147966680-147966839	NA	Macaque	9544
ENSMMUG00000014953_20-9	11	ENSMMUG00000014953_5:147742048-147742177	ENSMMUG00000014953_5:147829128-147829287	ENSG00000071205_4:147875021-147875150	ENSG00000071205_4:147966680-147966839	NA	Macaque	9544
ENSMMUG00000015029_9-4	6	ENSMMUG00000015029_20:66016015-66016232	ENSMMUG00000015029_20:66023570-66023698	ENSG00000261609_16:81356785-81357002	ENSG00000261609_16:81365350-81365478	NA	Macaque	9544
ENSMMUG00000015125_13-7	6	ENSMMUG00000015125_9:64303118-64303227	ENSMMUG00000015125_9:64306069-64306247	ENSG00000108187_10:68292129-68292238	ENSG00000108187_10:68287027-68289019	NA	Macaque	9544
ENSMMUG00000015159_16-9	7	ENSMMUG00000015159_7:27274567-27274689	ENSMMUG00000015159_7:27371344-27371467	ENSG00000081014_15:50941442-50941564	ENSG00000081014_15:50984022-50984145	NA	Macaque	9544
ENSMMUG00000015167_5-5	1	ENSMMUG00000015167_12:114576210-114576444	ENSMMUG00000015167_12:114576210-114576444	ENSG00000144535_2:232087487-232087721	ENSG00000144535_2:232087487-232087721	NA	Macaque	9544
ENSMMUG00000015370_13-7	7	ENSMMUG00000015370_9:20419143-20419261	ENSMMUG00000015370_9:20488544-20488582	ENSG00000120594_10:20147784-20147902	ENSG00000120594_10:20219064-20219102	NA	Macaque	9544
ENSMMUG00000015422_18-9	10	ENSMMUG00000015422_6:69560558-69560662	ENSMMUG00000015422_6:69606024-69606199	ENSG00000157107_5:73006445-73006549	ENSG00000157107_5:73052332-73052507	NA	Macaque	9544
ENSMMUG00000015570_18-18	1	ENSMMUG00000015570_20:26538650-26539372	ENSMMUG00000015570_20:26538650-26539372	ENSG00000047578_16:27749584-27750306	ENSG00000047578_16:27749584-27750306	NA	Macaque	9544
ENSMMUG00000015799_16-12	4	ENSMMUG00000015799_5:166296530-166296645	ENSMMUG00000015799_5:166314581-166314726	ENSG00000038295_4:166025316-166025431	ENSG00000038295_4:166043274-166043419	NA	Macaque	9544
ENSMMUG00000015799_16-14	3	ENSMMUG00000015799_5:166310644-166310746	ENSMMUG00000015799_5:166314581-166314726	ENSG00000038295_4:166039339-166039441	ENSG00000038295_4:166043274-166043419	NA	Macaque	9544
ENSMMUG00000015873_6-4	3	ENSMMUG00000015873_7:130030814-130030950	ENSMMUG00000015873_7:130048854-130049037	ENSG00000182185_14:67865003-67865087	ENSG00000182185_14:67887021-67887204	NA	Macaque	9544
ENSMMUG00000015962_22-12	7	ENSMMUG00000015962_11:43973825-43973891	ENSMMUG00000015962_11:43997783-43997931	ENSG00000189079_12:45836589-45836655	ENSG00000189079_12:45860801-45860949	NA	Macaque	9544
ENSMMUG00000016023_35-21	15	ENSMMUG00000016023_8:66240607-66240692	ENSMMUG00000016023_8:66291229-66291331	ENSG00000046889_8:68087724-68087809	ENSG00000046889_8:68138415-68138517	NA	Macaque	9544
ENSMMUG00000016130_12-4	8	ENSMMUG00000016130_1:97514295-97514467	ENSMMUG00000016130_1:97557420-97557636	ENSG00000117569_1:96769703-96769875	ENSG00000117569_1:96812712-96812928	NA	Macaque	9544
ENSMMUG00000016190_7-4	4	ENSMMUG00000016190_18:14757673-14757834	ENSMMUG00000016190_18:14769096-14769713	ENSG00000141384_18:26274663-26274824	ENSG00000141384_18:26285882-26286499	NA	Macaque	9544
ENSMMUG00000016277_20-10	10	ENSMMUG00000016277_13:42914354-42914477	ENSMMUG00000016277_13:42937485-42937552	ENSG00000143924_2:42280850-42280973	ENSG00000143924_2:42304484-42304551	NA	Macaque	9544
ENSMMUG00000016407_9-9	1	ENSMMUG00000016407_9:27182087-27183226	ENSMMUG00000016407_9:27182087-27183226	ENSG00000120539_10:27169944-27171083	ENSG00000120539_10:27169944-27171083	NA	Macaque	9544
ENSMMUG00000016430_12-8	5	ENSMMUG00000016430_13:107355995-107356111	ENSMMUG00000016430_13:107361022-107361131	ENSG00000188177_2:112316470-112316586	ENSG00000188177_2:112321756-112321865	NA	Macaque	9544
ENSMMUG00000016513_9-6	3	ENSMMUG00000016513_7:107137041-107137172	ENSMMUG00000016513_7:107140499-107140585	ENSG00000187790_14:45151397-45151528	ENSG00000187790_14:45155373-45155459	NA	Macaque	9544
ENSMMUG00000016522_12-4	6	ENSMMUG00000016522_6:63931335-63931594	ENSMMUG00000016522_6:63964634-63964835	ENSG00000123213_5:65758567-65758826	ENSG00000123213_5:65792454-65792655	NA	Macaque	9544
ENSMMUG00000016575_51-29	18	ENSMMUG00000016575_12:112892072-112892234	ENSMMUG00000016575_12:112923528-112923581	ENSG00000067066_2:230442937-230443099	ENSG00000067066_2:230474394-230474447	NA	Macaque	9544
ENSMMUG00000016637_2-2	1	ENSMMUG00000016637_20:53679726-53679939	ENSMMUG00000016637_20:53679726-53679939	ENSG00000168807_16:69245602-69245815	ENSG00000168807_16:69245602-69245815	NA	Macaque	9544
ENSMMUG00000016637_5-5	1	ENSMMUG00000016637_20:53716298-53716494	ENSMMUG00000016637_20:53716298-53716494	ENSG00000168807_16:69284048-69284244	ENSG00000168807_16:69284048-69284244	NA	Macaque	9544
ENSMMUG00000016652_16-13	2	ENSMMUG00000016652_9:63826405-63826424	ENSMMUG00000016652_9:63826262-63826454	ENSG00000060339_10:68747374-68747566	ENSG00000060339_10:68747374-68747566	NA	Macaque	9544
ENSMMUG00000017048_5-5	1	ENSMMUG00000017048_17:12630171-12631272	ENSMMUG00000017048_17:12630171-12631272	ENSG00000133116_13:33060679-33061780	ENSG00000133116_13:33060679-33061780	NA	Macaque	9544
ENSMMUG00000017119_10-7	4	ENSMMUG00000017119_9:965045-965140	ENSMMUG00000017119_9:972479-972550	ENSG00000047056_10:1080011-1080106	ENSG00000047056_10:1086286-1086357	NA	Macaque	9544
ENSMMUG00000017239_25-13	13	ENSMMUG00000017239_2:137973484-137973615	ENSMMUG00000017239_2:138146770-138146911	ENSG00000144893_3:151185330-151185461	ENSG00000144893_3:151365850-151365991	NA	Macaque	9544
ENSMMUG00000017627_37-28	10	ENSMMUG00000017627_9:87216531-87216640	ENSMMUG00000017627_9:87234686-87234816	ENSG00000095564_10:91994535-91994644	ENSG00000095564_10:92013899-92014029	NA	Macaque	9544
ENSMMUG00000017675_2-2	1	ENSMMUG00000017675_3:46288561-46288773	ENSMMUG00000017675_3:46288561-46288773	ENSG00000158321_7:69899286-69899498	ENSG00000158321_7:69899286-69899498	NA	Macaque	9544
ENSMMUG00000017700_9-2	6	ENSMMUG00000017700_8:28732516-28732609	ENSMMUG00000017700_8:28761951-28762079	ENSG00000012232_8:28713457-28713550	ENSG00000012232_8:28739901-28743214	NA	Macaque	9544
ENSMMUG00000017725_3-3	1	ENSMMUG00000017725_20:20824273-20824594	ENSMMUG00000017725_20:20824273-20824594	ENSG00000103319_16:22225654-22225975	ENSG00000103319_16:22225654-22225975	NA	Macaque	9544
ENSMMUG00000017817_17-6	9	ENSMMUG00000017817_1:114651720-114651777	ENSMMUG00000017817_1:114691806-114691991	ENSG00000081026_1:113614601-113614658	ENSG00000081026_1:113659080-113659265	NA	Macaque	9544
ENSMMUG00000017897_21-12	10	ENSMMUG00000017897_6:70476983-70477263	ENSMMUG00000017897_6:70505067-70505188	ENSG00000214944_5:73840480-73840760	ENSG00000214944_5:73868100-73868227	NA	Macaque	9544
ENSMMUG00000017952_11-2	10	ENSMMUG00000017952_4:48582119-48582279	ENSMMUG00000017952_4:48659968-48660030	ENSG00000198087_6:47503280-47503440	ENSG00000198087_6:47582003-47582065	NA	Macaque	9544
ENSMMUG00000018184_17-3	14	ENSMMUG00000018184_5:139348524-139348628	ENSMMUG00000018184_5:139390607-139390705	ENSG00000164134_4:139336848-139336952	ENSG00000164134_4:139378756-139378854	NA	Macaque	9544
ENSMMUG00000018237_38-8	26	ENSMMUG00000018237_11:94021671-94021785	ENSMMUG00000018237_11:94117740-94117814	ENSG00000136040_12:94209590-94209704	ENSG00000136040_12:94303977-94304051	NA	Macaque	9544
ENSMMUG00000018237_8-6	3	ENSMMUG00000018237_11:93993386-93993520	ENSMMUG00000018237_11:94021671-94021785	ENSG00000136040_12:94181446-94181580	ENSG00000136040_12:94209590-94209704	NA	Macaque	9544
ENSMMUG00000018259_19-15	4	ENSMMUG00000018259_3:157563600-157563729	ENSMMUG00000018259_3:157587013-157587115	ENSG00000128585_7:131445774-131445903	ENSG00000128585_7:131470838-131470944	NA	Macaque	9544
ENSMMUG00000018308_89-83	6	ENSMMUG00000018308_14:96209176-96209251	ENSMMUG00000018308_14:96253112-96253228	ENSG00000187240_11:103316545-103316620	ENSG00000187240_11:103358243-103358359	NA	Macaque	9544
ENSMMUG00000018308_91-73	16	ENSMMUG00000018308_14:96171455-96171520	ENSMMUG00000018308_14:96322940-96323029	ENSG00000187240_11:103280348-103280413	ENSG00000187240_11:103435943-103436032	NA	Macaque	9544
ENSMMUG00000018378_12-5	8	ENSMMUG00000018378_16:60160373-60160529	ENSMMUG00000018378_16:60217002-60217140	ENSG00000154229_17:66687111-66687267	ENSG00000154229_17:66742622-66742760	NA	Macaque	9544
ENSMMUG00000018409_20-14	6	ENSMMUG00000018409_17:24687357-24687517	ENSMMUG00000018409_17:24711632-24711766	ENSG00000136152_13:45496152-45496312	ENSG00000136152_13:45518960-45519094	NA	Macaque	9544
ENSMMUG00000018409_23-15	8	ENSMMUG00000018409_17:24695597-24695702	ENSMMUG00000018409_17:24723926-24724024	ENSG00000136152_13:45503244-45503349	ENSG00000136152_13:45530682-45530780	NA	Macaque	9544
ENSMMUG00000018433_23-14	10	ENSMMUG00000018433_X:24160315-24160427	ENSMMUG00000018433_X:24177273-24177448	ENSG00000101868_X:24723155-24723267	ENSG00000101868_X:24739375-24739550	NA	Macaque	9544
ENSMMUG00000018433_37-5	33	ENSMMUG00000018433_X:24138271-24138386	ENSMMUG00000018433_X:24264824-24264998	ENSG00000101868_X:24699425-24699549	ENSG00000101868_X:24826427-24826601	NA	Macaque	9544
ENSMMUG00000018433_39-27	12	ENSMMUG00000018433_X:24183281-24183405	ENSMMUG00000018433_X:24281896-24282027	ENSG00000101868_X:24745418-24745542	ENSG00000101868_X:24843546-24843677	NA	Macaque	9544
ENSMMUG00000018433_40-14	26	ENSMMUG00000018433_X:24160315-24160427	ENSMMUG00000018433_X:24326824-24326940	ENSG00000101868_X:24723155-24723267	ENSG00000101868_X:24888006-24888122	NA	Macaque	9544
ENSMMUG00000018433_41-5	37	ENSMMUG00000018433_X:24138271-24138386	ENSMMUG00000018433_X:24367054-24367150	ENSG00000101868_X:24699425-24699549	ENSG00000101868_X:24930453-24930549	NA	Macaque	9544
ENSMMUG00000018547_16-8	9	ENSMMUG00000018547_9:123006091-123006226	ENSMMUG00000018547_9:123035147-123035271	ENSG00000150760_10:126996748-126996883	ENSG00000150760_10:127023200-127023324	NA	Macaque	9544
ENSMMUG00000018547_25-19	7	ENSMMUG00000018547_9:123043602-123043705	ENSMMUG00000018547_9:123073841-123073949	ENSG00000150760_10:127031650-127031753	ENSG00000150760_10:127061668-127061776	NA	Macaque	9544
ENSMMUG00000018666_6-4	3	ENSMMUG00000018666_6:178179137-178179238	ENSMMUG00000018666_6:178188838-178188899	ENSG00000176783_5:179567461-179567562	ENSG00000176783_5:179577075-179577136	NA	Macaque	9544
ENSMMUG00000018719_8-6	3	ENSMMUG00000018719_16:22151420-22151629	ENSMMUG00000018719_16:22168006-22168092	ENSG00000087095_17:28168448-28168657	ENSG00000087095_17:28185179-28185265	NA	Macaque	9544
ENSMMUG00000018739_10-3	8	ENSMMUG00000018739_6:35981281-35981533	ENSMMUG00000018739_6:36011401-36011569	ENSG00000152582_5:35641431-35641683	ENSG00000152582_5:35670059-35670227	NA	Macaque	9544
ENSMMUG00000018849_8-6	1	ENSMMUG00000018849_20:14766570-14766651	ENSMMUG00000018849_20:14766570-14766651	ENSG00000140694_16:14627106-14627187	ENSG00000140694_16:14627106-14627187	NA	Macaque	9544
ENSMMUG00000019022_2-2	1	ENSMMUG00000019022_3:65117595-65117807	ENSMMUG00000019022_3:65117595-65117807	ENSG00000164543_7:43595901-43596113	ENSG00000164543_7:43595901-43596113	NA	Macaque	9544
ENSMMUG00000019106_16-12	5	ENSMMUG00000019106_1:101351194-101351353	ENSMMUG00000019106_1:101365794-101366127	ENSG00000079335_1:100484292-100484451	ENSG00000079335_1:100498929-100499262	NA	Macaque	9544
ENSMMUG00000019106_16-9	8	ENSMMUG00000019106_1:101322745-101322832	ENSMMUG00000019106_1:101365794-101366127	ENSG00000079335_1:100455405-100455492	ENSG00000079335_1:100498929-100499262	NA	Macaque	9544
ENSMMUG00000019125_11-3	7	ENSMMUG00000019125_3:133089604-133089714	ENSMMUG00000019125_3:133110486-133110581	ENSG00000091137_7:107672138-107672248	ENSG00000091137_7:107694621-107694716	NA	Macaque	9544
ENSMMUG00000019216_12-12	1	ENSMMUG00000019216_1:27405827-27406424	ENSMMUG00000019216_1:27405827-27406424	ENSG00000204138_1:28473554-28474151	ENSG00000204138_1:28473554-28474151	NA	Macaque	9544
ENSMMUG00000019239_16-12	5	ENSMMUG00000019239_5:26071008-26071080	ENSMMUG00000019239_5:26097550-26097612	ENSG00000109680_4:26666333-26666405	ENSG00000109680_4:26688345-26688407	NA	Macaque	9544
ENSMMUG00000019239_18-12	8	ENSMMUG00000019239_5:26071008-26071080	ENSMMUG00000019239_5:26123148-26123192	ENSG00000109680_4:26666333-26666405	ENSG00000109680_4:26720081-26720125	NA	Macaque	9544
ENSMMUG00000019239_22-13	10	ENSMMUG00000019239_5:26076703-26076741	ENSMMUG00000019239_5:26144159-26144250	ENSG00000109680_4:26672149-26672187	ENSG00000109680_4:26742508-26742599	NA	Macaque	9544
ENSMMUG00000019250_8-3	6	ENSMMUG00000019250_4:47747384-47747575	ENSMMUG00000019250_4:47760546-47760638	ENSG00000153291_6:46655843-46656034	ENSG00000153291_6:46670135-46670227	NA	Macaque	9544
ENSMMUG00000019270_7-6	2	ENSMMUG00000019270_4:71494697-71494809	ENSMMUG00000019270_4:71494901-71495091	ENSG00000135297_6:73479732-73479844	ENSG00000135297_6:73479732-73480126	NA	Macaque	9544
ENSMMUG00000019305_14-13	2	ENSMMUG00000019305_16:53445633-53445695	ENSMMUG00000019305_16:53445881-53445958	ENSG00000108443_17:59936215-59936541	ENSG00000108443_17:59936215-59936541	NA	Macaque	9544
ENSMMUG00000019691_13-6	8	ENSMMUG00000019691_7:91971565-91971662	ENSMMUG00000019691_7:91987114-91987246	ENSG00000092140_14:30586718-30586815	ENSG00000092140_14:30601999-30602131	NA	Macaque	9544
ENSMMUG00000019692_27-19	8	ENSMMUG00000019692_7:92072740-92072836	ENSMMUG00000019692_7:92100077-92100142	ENSG00000092108_14:30694773-30694869	ENSG00000092108_14:30722494-30722559	NA	Macaque	9544
ENSMMUG00000019692_28-21	7	ENSMMUG00000019692_7:92080221-92080300	ENSMMUG00000019692_7:92110182-92110250	ENSG00000092108_14:30702296-30702375	ENSG00000092108_14:30734494-30734858	NA	Macaque	9544
ENSMMUG00000019692_28-4	20	ENSMMUG00000019692_7:92013870-92013940	ENSMMUG00000019692_7:92110182-92110250	ENSG00000092108_14:30628209-30628279	ENSG00000092108_14:30734494-30734858	NA	Macaque	9544
ENSMMUG00000019838_11-5	6	ENSMMUG00000019838_7:63248985-63249041	ENSMMUG00000019838_7:63264185-63264322	ENSG00000073417_15:85075862-85075918	ENSG00000073417_15:85091044-85091181	NA	Macaque	9544
ENSMMUG00000019838_19-16	4	ENSMMUG00000019838_7:63282528-63282605	ENSMMUG00000019838_7:63288955-63289003	ENSG00000073417_15:85109053-85109130	ENSG00000073417_15:85115256-85115487	NA	Macaque	9544
ENSMMUG00000020065_7-7	1	ENSMMUG00000020065_20:34002715-34002992	ENSMMUG00000020065_20:34002715-34002992	ENSG00000155393_16:50078741-50079018	ENSG00000155393_16:50078741-50079018	NA	Macaque	9544
ENSMMUG00000020335_5-5	1	ENSMMUG00000020335_2:15043443-15043692	ENSMMUG00000020335_2:15043443-15043692	ENSG00000169379_3:94003659-94003908	ENSG00000169379_3:94003659-94003908	NA	Macaque	9544
ENSMMUG00000020588_26-4	17	ENSMMUG00000020588_1:88953373-88953673	ENSMMUG00000020588_1:89029158-89029334	ENSG00000065243_1:88740988-88741288	ENSG00000065243_1:88813557-88813733	NA	Macaque	9544
ENSMMUG00000020588_4-4	1	ENSMMUG00000020588_1:88953373-88953673	ENSMMUG00000020588_1:88953373-88953673	ENSG00000065243_1:88740988-88741288	ENSG00000065243_1:88740988-88741288	NA	Macaque	9544
ENSMMUG00000020677_6-3	2	ENSMMUG00000020677_13:49177188-49177738	ENSMMUG00000020677_13:49177188-49177738	ENSG00000170802_2:48346201-48346751	ENSG00000170802_2:48346201-48346751	NA	Macaque	9544
ENSMMUG00000020744_10-3	8	ENSMMUG00000020744_13:43219834-43219901	ENSMMUG00000020744_13:43311223-43311322	ENSG00000057935_2:42570437-42570504	ENSG00000057935_2:42659520-42659862	NA	Macaque	9544
ENSMMUG00000020744_10-6	5	ENSMMUG00000020744_13:43256944-43257070	ENSMMUG00000020744_13:43311223-43311322	ENSG00000057935_2:42609458-42609584	ENSG00000057935_2:42659520-42659862	NA	Macaque	9544
ENSMMUG00000020744_19-12	7	ENSMMUG00000020744_13:43348577-43348651	ENSMMUG00000020744_13:43361125-43361347	ENSG00000057935_2:42695765-42695839	ENSG00000057935_2:42708874-42709096	NA	Macaque	9544
ENSMMUG00000020744_19-7	12	ENSMMUG00000020744_13:43290678-43290741	ENSMMUG00000020744_13:43361125-43361347	ENSG00000057935_2:42640173-42640236	ENSG00000057935_2:42708874-42709096	NA	Macaque	9544
ENSMMUG00000020784_6-6	1	ENSMMUG00000020784_14:94865333-94867466	ENSMMUG00000020784_14:94865333-94867466	ENSG00000110318_11:101961741-101963880	ENSG00000110318_11:101961741-101963880	NA	Macaque	9544
ENSMMUG00000020931_11-3	7	ENSMMUG00000020931_5:127298104-127298188	ENSMMUG00000020931_5:127328058-127328085	ENSG00000164074_4:127984339-127984423	ENSG00000164074_4:128011673-128011700	NA	Macaque	9544
ENSMMUG00000020931_16-13	5	ENSMMUG00000020931_5:127336338-127336427	ENSMMUG00000020931_5:127343908-127344070	ENSG00000164074_4:128020080-128020169	ENSG00000164074_4:128030510-128030672	NA	Macaque	9544
ENSMMUG00000021113_24-19	6	ENSMMUG00000021113_8:93297071-93297202	ENSMMUG00000021113_8:93309881-93310001	ENSG00000156162_8:94765183-94765314	ENSG00000156162_8:94777666-94777786	NA	Macaque	9544
ENSMMUG00000021113_24-21	4	ENSMMUG00000021113_8:93298491-93298564	ENSMMUG00000021113_8:93309881-93310001	ENSG00000156162_8:94766612-94766685	ENSG00000156162_8:94777666-94777786	NA	Macaque	9544
ENSMMUG00000021329_6-4	3	ENSMMUG00000021329_11:76847958-76848030	ENSMMUG00000021329_11:76884034-76884102	ENSG00000067798_12:77966229-77966301	ENSG00000067798_12:77994803-77994871	NA	Macaque	9544
ENSMMUG00000021436_20-15	5	ENSMMUG00000021436_13:33702731-33702898	ENSMMUG00000021436_13:33712259-33712357	ENSG00000049323_2:33252677-33252844	ENSG00000049323_2:33263294-33263392	NA	Macaque	9544
ENSMMUG00000021436_27-15	12	ENSMMUG00000021436_13:33702731-33702898	ENSMMUG00000021436_13:33748983-33749105	ENSG00000049323_2:33252677-33252844	ENSG00000049323_2:33301522-33301644	NA	Macaque	9544
ENSMMUG00000021480_18-10	8	ENSMMUG00000021480_18:11998291-11998380	ENSMMUG00000021480_18:12005683-12005811	ENSG00000141452_18:23518890-23518979	ENSG00000141452_18:23526637-23526765	NA	Macaque	9544
ENSMMUG00000021792_21-20	2	ENSMMUG00000021792_18:69348084-69348245	ENSMMUG00000021792_18:69349262-69349354	ENSG00000166377_18:79329141-79329302	ENSG00000166377_18:79330012-79330104	NA	Macaque	9544
ENSMMUG00000021792_21-7	13	ENSMMUG00000021792_18:69152336-69152444	ENSMMUG00000021792_18:69349262-69349354	ENSG00000166377_18:79126267-79126375	ENSG00000166377_18:79330012-79330104	NA	Macaque	9544
ENSMMUG00000021843_14-14	1	ENSMMUG00000021843_20:52561416-52562423	ENSMMUG00000021843_20:52561416-52562423	ENSG00000072736_16:68190768-68191775	ENSG00000072736_16:68190768-68191775	NA	Macaque	9544
ENSMMUG00000021911_10-4	8	ENSMMUG00000021911_16:43449780-43449886	ENSMMUG00000021911_16:43468585-43468657	ENSG00000276234_17:37423509-37423615	ENSG00000276234_17:37444696-37444768	NA	Macaque	9544
ENSMMUG00000022023_8-3	6	ENSMMUG00000022023_15:92201470-92201574	ENSMMUG00000022023_15:92340309-92340481	ENSG00000099139_9:75932379-75932483	ENSG00000099139_9:76071726-76071898	NA	Macaque	9544
ENSMMUG00000022154_33-13	21	ENSMMUG00000022154_6:37386980-37387177	ENSMMUG00000022154_6:37411425-37411478	ENSG00000164190_5:37000373-37000570	ENSG00000164190_5:37027359-37027412	NA	Macaque	9544
ENSMMUG00000022186_18-12	7	ENSMMUG00000022186_8:97793459-97793554	ENSMMUG00000022186_8:97817987-97818181	ENSG00000132549_8:99134632-99134727	ENSG00000132549_8:99156549-99156743	NA	Macaque	9544
ENSMMUG00000022186_35-22	14	ENSMMUG00000022186_8:97947378-97947512	ENSMMUG00000022186_8:98182840-98182951	ENSG00000132549_8:99274198-99274332	ENSG00000132549_8:99520899-99521010	NA	Macaque	9544
ENSMMUG00000022186_38-24	15	ENSMMUG00000022186_8:98034166-98034275	ENSMMUG00000022186_8:98247125-98247268	ENSG00000132549_8:99384208-99384317	ENSG00000132549_8:99577490-99577633	NA	Macaque	9544
ENSMMUG00000022186_40-12	28	ENSMMUG00000022186_8:97793459-97793554	ENSMMUG00000022186_8:98325068-98325205	ENSG00000132549_8:99134632-99134727	ENSG00000132549_8:99661354-99661491	NA	Macaque	9544
ENSMMUG00000022186_40-27	14	ENSMMUG00000022186_8:98092581-98092815	ENSMMUG00000022186_8:98325068-98325205	ENSG00000132549_8:99442401-99442635	ENSG00000132549_8:99661354-99661491	NA	Macaque	9544
ENSMMUG00000022186_45-22	24	ENSMMUG00000022186_8:97947378-97947512	ENSMMUG00000022186_8:98485587-98485783	ENSG00000132549_8:99274198-99274332	ENSG00000132549_8:99766774-99766970	NA	Macaque	9544
ENSMMUG00000022186_45-33	13	ENSMMUG00000022186_8:98170029-98170170	ENSMMUG00000022186_8:98485587-98485783	ENSG00000132549_8:99507770-99507911	ENSG00000132549_8:99766774-99766970	NA	Macaque	9544
ENSMMUG00000022186_59-42	18	ENSMMUG00000022186_8:98441036-98441238	ENSMMUG00000022186_8:98555502-98555701	ENSG00000132549_8:99717171-99717373	ENSG00000132549_8:99835539-99835738	NA	Macaque	9544
ENSMMUG00000022186_59-49	11	ENSMMUG00000022186_8:98529387-98529542	ENSMMUG00000022186_8:98555502-98555701	ENSG00000132549_8:99809375-99809530	ENSG00000132549_8:99835539-99835738	NA	Macaque	9544
ENSMMUG00000022199_13-10	3	ENSMMUG00000022199_2:123690363-123690461	ENSMMUG00000022199_2:123699541-123699787	ENSG00000173889_3:170145423-170145521	ENSG00000173889_3:170136366-170136665	NA	Macaque	9544
ENSMMUG00000022199_18-17	2	ENSMMUG00000022199_2:123713436-123713589	ENSMMUG00000022199_2:123718702-123718952	ENSG00000173889_3:170122591-170122744	ENSG00000173889_3:170117123-170117476	NA	Macaque	9544
ENSMMUG00000022242_27-5	20	ENSMMUG00000022242_5:92754167-92754344	ENSMMUG00000022242_5:92813106-92813215	ENSG00000163104_4:94226119-94226296	ENSG00000163104_4:94284960-94285069	NA	Macaque	9544
ENSMMUG00000022268_6-2	5	ENSMMUG00000022268_13:29214350-29214487	ENSMMUG00000022268_13:29230216-29230318	ENSG00000163811_2:28901987-28902124	ENSG00000163811_2:28917893-28917995	NA	Macaque	9544
ENSMMUG00000022371_14-2	13	ENSMMUG00000022371_X:144229657-144229729	ENSMMUG00000022371_X:144297749-144297925	ENSG00000171100_X:150592605-150592677	ENSG00000171100_X:150663433-150663609	NA	Macaque	9544
ENSMMUG00000022404_27-14	14	ENSMMUG00000022404_11:98516660-98516786	ENSMMUG00000022404_11:98564959-98565102	ENSG00000120868_12:98677425-98677551	ENSG00000120868_12:98727173-98727316	NA	Macaque	9544
ENSMMUG00000022414_7-6	2	ENSMMUG00000022414_16:70499456-70499535	ENSMMUG00000022414_16:70499664-70499760	ENSG00000092931_17:76741969-76742048	ENSG00000092931_17:76742177-76742273	NA	Macaque	9544
ENSMMUG00000022655_27-21	7	ENSMMUG00000022655_8:31177639-31177745	ENSMMUG00000022655_8:31206868-31207009	ENSG00000165392_8:31100849-31100955	ENSG00000165392_8:31132365-31132506	NA	Macaque	9544
ENSMMUG00000022655_27-22	6	ENSMMUG00000022655_8:31187225-31187412	ENSMMUG00000022655_8:31206868-31207009	ENSG00000165392_8:31111615-31111799	ENSG00000165392_8:31132365-31132506	NA	Macaque	9544
ENSMMUG00000022655_33-21	13	ENSMMUG00000022655_8:31177639-31177745	ENSMMUG00000022655_8:31222102-31222214	ENSG00000165392_8:31100849-31100955	ENSG00000165392_8:31147364-31147476	NA	Macaque	9544
ENSMMUG00000022698_13-5	8	ENSMMUG00000022698_11:109088298-109088407	ENSMMUG00000022698_11:109097037-109097207	ENSG00000076555_12:109171805-109171914	ENSG00000076555_12:109179917-109180087	NA	Macaque	9544
ENSMMUG00000023032_18-14	5	ENSMMUG00000023032_11:110092581-110092727	ENSMMUG00000023032_11:110122547-110122636	ENSG00000122970_12:110162919-110163065	ENSG00000122970_12:110192617-110192706	NA	Macaque	9544
ENSMMUG00000023032_18-17	2	ENSMMUG00000023032_11:110120869-110120997	ENSMMUG00000023032_11:110122547-110122636	ENSG00000122970_12:110190920-110191048	ENSG00000122970_12:110192617-110192706	NA	Macaque	9544
ENSMMUG00000023032_22-17	6	ENSMMUG00000023032_11:110120869-110120997	ENSMMUG00000023032_11:110137715-110137760	ENSG00000122970_12:110190920-110191048	ENSG00000122970_12:110209171-110209216	NA	Macaque	9544
ENSMMUG00000023076_36-18	19	ENSMMUG00000023076_17:21381832-21381940	ENSMMUG00000023076_17:21432587-21432695	ENSG00000102780_13:42168440-42168548	ENSG00000102780_13:42219686-42219794	NA	Macaque	9544
ENSMMUG00000023198_3-3	1	ENSMMUG00000023198_9:63929751-63932046	ENSMMUG00000023198_9:63929751-63932046	ENSG00000138336_10:68644698-68647005	ENSG00000138336_10:68644698-68647005	NA	Macaque	9544
ENSMMUG00000023240_18-8	11	ENSMMUG00000023240_5:108413788-108413868	ENSMMUG00000023240_5:108443645-108443851	ENSG00000138802_4:109491327-109491407	ENSG00000138802_4:109521420-109521626	NA	Macaque	9544
ENSMMUG00000023240_24-22	3	ENSMMUG00000023240_5:108449603-108449713	ENSMMUG00000023240_5:108453628-108453765	ENSG00000138802_4:109527322-109527432	ENSG00000138802_4:109531385-109531522	NA	Macaque	9544
ENSMMUG00000023240_27-8	20	ENSMMUG00000023240_5:108413788-108413868	ENSMMUG00000023240_5:108460756-108460859	ENSG00000138802_4:109491327-109491407	ENSG00000138802_4:109538493-109538596	NA	Macaque	9544
ENSMMUG00000023266_10-2	9	ENSMMUG00000023266_9:87825772-87825904	ENSMMUG00000023266_9:87843060-87843148	ENSG00000138160_10:92606265-92606397	ENSG00000138160_10:92621385-92621473	NA	Macaque	9544
ENSMMUG00000023288_27-23	5	ENSMMUG00000023288_6:144537102-144537191	ENSMMUG00000023288_6:144557507-144557689	ENSG00000113649_5:146483540-146483629	ENSG00000113649_5:146503824-146504006	NA	Macaque	9544
ENSMMUG00000023330_3-3	1	ENSMMUG00000023330_2:17976063-17976726	ENSMMUG00000023330_2:17976063-17976726	ENSG00000080224_3:96987330-96987993	ENSG00000080224_3:96987330-96987993	NA	Macaque	9544
ENSMMUG00000023448_15-15	1	ENSMMUG00000023448_15:66575370-66575905	ENSMMUG00000023448_15:66575370-66575905	ENSG00000044459_9:17394534-17395069	ENSG00000044459_9:17394534-17395069	NA	Macaque	9544
ENSMMUG00000023488_4-4	1	ENSMMUG00000023488_9:57488682-57489560	ENSMMUG00000023488_9:57488682-57489560	ENSG00000156650_10:74842600-74843478	ENSG00000156650_10:74842600-74843478	NA	Macaque	9544
ENSMMUG00000023622_20-17	4	ENSMMUG00000023622_10:65220309-65220369	ENSMMUG00000023622_10:65222406-65222546	ENSG00000186716_22:23271532-23271592	ENSG00000186716_22:23273634-23273774	NA	Macaque	9544
ENSMMUG00000023648_11-7	4	ENSMMUG00000023648_9:21786756-21786810	ENSMMUG00000023648_9:21823037-21823132	ENSG00000078403_10:21586294-21586348	ENSG00000078403_10:21617112-21617207	NA	Macaque	9544
ENSMMUG00000023648_22-16	7	ENSMMUG00000023648_9:21882485-21882529	ENSMMUG00000023648_9:21915940-21916118	ENSG00000078403_10:21681332-21681376	ENSG00000078403_10:21713772-21713950	NA	Macaque	9544
ENSMMUG00000023651_24-20	5	ENSMMUG00000023651_5:184109506-184109661	ENSMMUG00000023651_5:184112850-184112969	ENSG00000168538_4:183691316-183691471	ENSG00000168538_4:183694604-183694723	NA	Macaque	9544
ENSMMUG00000023790_10-6	5	ENSMMUG00000023790_10:67477344-67477418	ENSMMUG00000023790_10:67488693-67488792	ENSG00000100077_22:25663630-25663704	ENSG00000100077_22:25678816-25678915	NA	Macaque	9544
ENSMMUG00000029588_16-13	4	ENSMMUG00000029588_7:43277779-43277935	ENSMMUG00000029588_7:43282983-43283078	ENSG00000174442_15:66532247-66532403	ENSG00000174442_15:66537168-66537263	NA	Macaque	9544
ENSMMUG00000029592_7-4	4	ENSMMUG00000029592_4:68836221-68836354	ENSMMUG00000029592_4:68881508-68881588	ENSG00000112305_6:70732378-70732511	ENSG00000112305_6:70791689-70791769	NA	Macaque	9544
ENSMMUG00000029682_9-4	6	ENSMMUG00000029682_4:43826012-43826060	ENSMMUG00000029682_4:43863203-43863303	ENSG00000112624_6:42822796-42822844	ENSG00000112624_6:42853638-42853738	NA	Macaque	9544
ENSMMUG00000030812_4-3	2	ENSMMUG00000030812_17:569430-569931	ENSMMUG00000030812_17:570193-570286	ENSG00000121741_13:19993063-19993919	ENSG00000121741_13:19993063-19993919	NA	Macaque	9544
ENSMMUG00000044812_7-6	2	ENSMMUG00000044812_8:16949243-16949357	ENSMMUG00000044812_8:16949838-16949938	ENSG00000155975_8:17268258-17268372	ENSG00000155975_8:17268856-17268956	NA	Macaque	9544
ENSMMUG00000046092_11-2	10	ENSMMUG00000046092_4:67082414-67082524	ENSMMUG00000046092_4:67170213-67170321	ENSG00000135298_6:68930559-68930669	ENSG00000135298_6:69018391-69018499	NA	Macaque	9544
ENSMFAG00000000067_17-9	7	ENSMFAG00000000067_7:154940914-154941006	ENSMFAG00000000067_7:154954097-154954204	ENSG00000042088_14:89980540-89980679	ENSG00000042088_14:89993376-89993483	NA	Macaca	9541
ENSMFAG00000000096_17-14	4	ENSMFAG00000000096_5:19651553-19651691	ENSMFAG00000000096_5:19677943-19678014	ENSG00000145147_4:20491761-20491899	ENSG00000145147_4:20519382-20519453	NA	Macaca	9541
ENSMFAG00000000138_10-7	3	ENSMFAG00000000138_16:78309580-78309666	ENSMFAG00000000138_16:78331842-78332017	ENSG00000141564_17:80730560-80730706	ENSG00000141564_17:80754010-80754185	NA	Macaca	9541
ENSMFAG00000000192_3-3	1	ENSMFAG00000000192_2:174997849-174998512	ENSMFAG00000000192_2:174997849-174998512	ENSG00000080224_3:96987330-96987993	ENSG00000080224_3:96987330-96987993	NA	Macaca	9541
ENSMFAG00000000236_7-6	2	ENSMFAG00000000236_X:115202572-115202641	ENSMFAG00000000236_X:115203260-115203355	ENSG00000147251_X:118545323-118545392	ENSG00000147251_X:118546021-118546116	NA	Macaca	9541
ENSMFAG00000000286_12-6	7	ENSMFAG00000000286_5:25872681-25872755	ENSMFAG00000000286_5:25904766-25904878	ENSG00000109680_4:26637211-26637285	ENSG00000109680_4:26673776-26673888	NA	Macaca	9541
ENSMFAG00000000286_14-10	5	ENSMFAG00000000286_5:25897419-25897491	ENSMFAG00000000286_5:25923982-25924044	ENSG00000109680_4:26666333-26666405	ENSG00000109680_4:26688345-26688407	NA	Macaca	9541
ENSMFAG00000000286_14-11	4	ENSMFAG00000000286_5:25903108-25903146	ENSMFAG00000000286_5:25923982-25924044	ENSG00000109680_4:26672149-26672187	ENSG00000109680_4:26688345-26688407	NA	Macaca	9541
ENSMFAG00000000383_21-14	7	ENSMFAG00000000383_7:109435955-109436110	ENSMFAG00000000383_7:109453643-109454206	ENSG00000187790_14:45173055-45173210	ENSG00000187790_14:45188802-45189362	NA	Macaca	9541
ENSMFAG00000000383_22-16	7	ENSMFAG00000000383_7:109445561-109445655	ENSMFAG00000000383_7:109461185-109461560	ENSG00000187790_14:45181430-45181524	ENSG00000187790_14:45196172-45196547	NA	Macaca	9541
ENSMFAG00000000467_12-7	3	ENSMFAG00000000467_2:1104820-1104927	ENSMFAG00000000467_2:1109492-1109555	ENSG00000180370_3:196806579-196806686	ENSG00000180370_3:196810590-196810653	NA	Macaca	9541
ENSMFAG00000000774_15-4	9	ENSMFAG00000000774_2:91845193-91845266	ENSMFAG00000000774_2:91881978-91882041	ENSG00000076242_3:37004401-37004474	ENSG00000076242_3:37042268-37042331	NA	Macaca	9541
ENSMFAG00000001092_16-11	6	ENSMFAG00000001092_8:95901697-95901828	ENSMFAG00000001092_8:95917586-95917706	ENSG00000156162_8:94765183-94765314	ENSG00000156162_8:94777666-94777786	NA	Macaca	9541
ENSMFAG00000001092_16-13	4	ENSMFAG00000001092_8:95903117-95903190	ENSMFAG00000001092_8:95917586-95917706	ENSG00000156162_8:94766612-94766685	ENSG00000156162_8:94777666-94777786	NA	Macaca	9541
ENSMFAG00000001092_16-3	13	ENSMFAG00000001092_8:95856881-95856991	ENSMFAG00000001092_8:95917586-95917706	ENSG00000156162_8:94726331-94726441	ENSG00000156162_8:94777666-94777786	NA	Macaca	9541
ENSMFAG00000001092_16-9	8	ENSMFAG00000001092_8:95893565-95893688	ENSMFAG00000001092_8:95917586-95917706	ENSG00000156162_8:94756036-94756159	ENSG00000156162_8:94777666-94777786	NA	Macaca	9541
ENSMFAG00000001092_8-3	5	ENSMFAG00000001092_8:95856881-95856991	ENSMFAG00000001092_8:95874074-95874219	ENSG00000156162_8:94726331-94726441	ENSG00000156162_8:94739645-94739790	NA	Macaca	9541
ENSMFAG00000001092_9-5	5	ENSMFAG00000001092_8:95869393-95869517	ENSMFAG00000001092_8:95893565-95893688	ENSG00000156162_8:94734630-94734754	ENSG00000156162_8:94756036-94756159	NA	Macaca	9541
ENSMFAG00000001125_12-11	2	ENSMFAG00000001125_5:165296329-165296453	ENSMFAG00000001125_5:165307468-165307583	ENSG00000038295_4:166014436-166014560	ENSG00000038295_4:166025316-166025431	NA	Macaca	9541
ENSMFAG00000001125_16-12	4	ENSMFAG00000001125_5:165307468-165307583	ENSMFAG00000001125_5:165325523-165325668	ENSG00000038295_4:166025316-166025431	ENSG00000038295_4:166043274-166043419	NA	Macaca	9541
ENSMFAG00000001125_24-12	11	ENSMFAG00000001125_5:165307468-165307583	ENSMFAG00000001125_5:165372845-165373058	ENSG00000038295_4:166025316-166025431	ENSG00000038295_4:166091128-166091341	NA	Macaca	9541
ENSMFAG00000001226_12-8	5	ENSMFAG00000001226_18:61451041-61451099	ENSMFAG00000001226_18:61457663-61457777	ENSG00000101557_18:192842-192900	ENSG00000101557_18:199202-199316	NA	Macaca	9541
ENSMFAG00000001327_16-14	3	ENSMFAG00000001327_11:113754231-113754380	ENSMFAG00000001327_11:113766513-113766602	ENSG00000122970_12:110180422-110180571	ENSG00000122970_12:110192617-110192706	NA	Macaca	9541
ENSMFAG00000001327_16-15	2	ENSMFAG00000001327_11:113764835-113764963	ENSMFAG00000001327_11:113766513-113766602	ENSG00000122970_12:110190920-110191048	ENSG00000122970_12:110192617-110192706	NA	Macaca	9541
ENSMFAG00000001327_20-6	15	ENSMFAG00000001327_11:113707199-113707288	ENSMFAG00000001327_11:113782852-113782897	ENSG00000122970_12:110132547-110132636	ENSG00000122970_12:110209171-110209216	NA	Macaca	9541
ENSMFAG00000001338_22-13	10	ENSMFAG00000001338_X:22716143-22716255	ENSMFAG00000001338_X:22733088-22733263	ENSG00000101868_X:24723155-24723267	ENSG00000101868_X:24739375-24739550	NA	Macaca	9541
ENSMFAG00000001338_36-4	33	ENSMFAG00000001338_X:22694102-22694217	ENSMFAG00000001338_X:22831902-22832076	ENSG00000101868_X:24699425-24699549	ENSG00000101868_X:24826427-24826601	NA	Macaca	9541
ENSMFAG00000001338_38-13	25	ENSMFAG00000001338_X:22716143-22716255	ENSMFAG00000001338_X:22848971-22849102	ENSG00000101868_X:24723155-24723267	ENSG00000101868_X:24843546-24843677	NA	Macaca	9541
ENSMFAG00000001338_39-13	26	ENSMFAG00000001338_X:22716143-22716255	ENSMFAG00000001338_X:22893888-22894004	ENSG00000101868_X:24723155-24723267	ENSG00000101868_X:24888006-24888122	NA	Macaca	9541
ENSMFAG00000001338_40-35	6	ENSMFAG00000001338_X:22825964-22826095	ENSMFAG00000001338_X:22937852-22937948	ENSG00000101868_X:24821452-24821583	ENSG00000101868_X:24930453-24930549	NA	Macaca	9541
ENSMFAG00000001400_20-6	15	ENSMFAG00000001400_16:40502640-40502746	ENSMFAG00000001400_16:40646699-40646756	ENSG00000166263_17:54999345-54999451	ENSG00000166263_17:55141310-55141367	NA	Macaca	9541
ENSMFAG00000001402_28-14	14	ENSMFAG00000001402_3:46524622-46524670	ENSMFAG00000001402_3:46570490-46570546	ENSG00000257923_7:102158560-102158608	ENSG00000257923_7:102205114-102205170	NA	Macaca	9541
ENSMFAG00000001446_4-4	1	ENSMFAG00000001446_4:127765479-127767158	ENSMFAG00000001446_4:127765479-127767158	ENSG00000112624_6:42828493-42830172	ENSG00000112624_6:42828493-42830172	NA	Macaca	9541
ENSMFAG00000001541_20-12	10	ENSMFAG00000001541_1:36832586-36832653	ENSMFAG00000001541_1:36854852-36854943	ENSG00000116191_1:178883466-178883533	ENSG00000116191_1:178906776-178906867	NA	Macaca	9541
ENSMFAG00000001618_10-2	8	ENSMFAG00000001618_15:108113283-108113370	ENSMFAG00000001618_15:108146476-108146586	ENSG00000158079_9:94064734-94064821	ENSG00000158079_9:94104275-94104385	NA	Macaca	9541
ENSMFAG00000001654_3-3	1	ENSMFAG00000001654_5:149318766-149319100	ENSMFAG00000001654_5:149318766-149319100	ENSG00000170390_4:150102478-150102812	ENSG00000170390_4:150102478-150102812	NA	Macaca	9541
ENSMFAG00000001657_7-3	4	ENSMFAG00000001657_14:71153860-71153977	ENSMFAG00000001657_14:71192546-71192620	ENSG00000198382_11:75851883-75852000	ENSG00000198382_11:75888829-75888903	NA	Macaca	9541
ENSMFAG00000001785_21-6	15	ENSMFAG00000001785_4:53138605-53138739	ENSMFAG00000001785_4:53207806-53207957	ENSG00000164506_6:147260615-147260749	ENSG00000164506_6:147327125-147327276	NA	Macaca	9541
ENSMFAG00000001835_5-2	2	ENSMFAG00000001835_9:102398466-102398521	ENSMFAG00000001835_9:102399773-102399869	ENSG00000156374_10:103347395-103347450	ENSG00000156374_10:103348355-103348812	NA	Macaca	9541
ENSMFAG00000002007_12-12	1	ENSMFAG00000002007_3:10547613-10548297	ENSMFAG00000002007_3:10547613-10548297	ENSG00000142197_21:36230450-36231134	ENSG00000142197_21:36230450-36231134	NA	Macaca	9541
ENSMFAG00000002058_13-8	6	ENSMFAG00000002058_12:20680645-20680716	ENSMFAG00000002058_12:20707882-20708015	ENSG00000152127_2:134336217-134336288	ENSG00000152127_2:134362275-134362408	NA	Macaca	9541
ENSMFAG00000002069_23-5	17	ENSMFAG00000002069_6:142084122-142084223	ENSMFAG00000002069_6:142347637-142347787	ENSG00000145819_5:142885298-142885399	ENSG00000145819_5:143147231-143147381	NA	Macaca	9541
ENSMFAG00000002547_8-8	1	ENSMFAG00000002547_5:176683317-176683737	ENSMFAG00000002547_5:176683317-176683737	ENSG00000109674_4:177353308-177353728	ENSG00000109674_4:177353308-177353728	NA	Macaca	9541
ENSMFAG00000002559_10-10	1	ENSMFAG00000002559_1:101627101-101627276	ENSMFAG00000002559_1:101627101-101627276	ENSG00000163125_1:150446226-150446401	ENSG00000163125_1:150446226-150446401	NA	Macaca	9541
ENSMFAG00000002650_13-5	8	ENSMFAG00000002650_18:69089301-69089416	ENSMFAG00000002650_18:69265848-69265884	ENSG00000173482_18:7926568-7926683	ENSG00000173482_18:8114791-8114827	NA	Macaca	9541
ENSMFAG00000002650_7-3	5	ENSMFAG00000002650_18:69050070-69050341	ENSMFAG00000002650_18:69118008-69118301	ENSG00000173482_18:7888106-7888377	ENSG00000173482_18:7955121-7955414	NA	Macaca	9541
ENSMFAG00000002697_12-10	3	ENSMFAG00000002697_5:37665721-37665831	ENSMFAG00000002697_5:37676381-37676467	ENSG00000065882_4:38035588-38035698	ENSG00000065882_4:38045817-38045903	NA	Macaca	9541
ENSMFAG00000002763_17-6	11	ENSMFAG00000002763_12:128180080-128180223	ENSMFAG00000002763_12:128208749-128208825	ENSG00000204104_2:238328686-238328829	ENSG00000204104_2:238356004-238356080	NA	Macaca	9541
ENSMFAG00000002768_11-7	5	ENSMFAG00000002768_11:110507136-110507744	ENSMFAG00000002768_11:110543793-110543937	ENSG00000111785_12:106814696-106815304	ENSG00000111785_12:106851450-106851594	NA	Macaca	9541
ENSMFAG00000002768_12-5	7	ENSMFAG00000002768_11:110474319-110474366	ENSMFAG00000002768_11:110551482-110551626	ENSG00000111785_12:106783997-106784044	ENSG00000111785_12:106860268-106860412	NA	Macaca	9541
ENSMFAG00000002838_6-5	2	ENSMFAG00000002838_9:87464215-87464432	ENSMFAG00000002838_9:87467750-87467825	ENSG00000138134_10:88905443-88905660	ENSG00000138134_10:88908702-88908777	NA	Macaca	9541
ENSMFAG00000002864_20-12	8	ENSMFAG00000002864_20:18965531-18965615	ENSMFAG00000002864_20:18990481-18990603	ENSG00000103544_16:19591790-19591874	ENSG00000103544_16:19616686-19616808	NA	Macaca	9541
ENSMFAG00000002864_20-9	9	ENSMFAG00000002864_20:18949297-18949373	ENSMFAG00000002864_20:18990481-18990603	ENSG00000103544_16:19579052-19579128	ENSG00000103544_16:19616686-19616808	NA	Macaca	9541
ENSMFAG00000002864_28-23	6	ENSMFAG00000002864_20:19002998-19003114	ENSMFAG00000002864_20:19016670-19016750	ENSG00000103544_16:19628637-19628753	ENSG00000103544_16:19642396-19642476	NA	Macaca	9541
ENSMFAG00000002864_28-9	16	ENSMFAG00000002864_20:18949297-18949373	ENSMFAG00000002864_20:19016670-19016750	ENSG00000103544_16:19579052-19579128	ENSG00000103544_16:19642396-19642476	NA	Macaca	9541
ENSMFAG00000002864_34-29	6	ENSMFAG00000002864_20:19019215-19019278	ENSMFAG00000002864_20:19057014-19057179	ENSG00000103544_16:19644886-19644949	ENSG00000103544_16:19682225-19682390	NA	Macaca	9541
ENSMFAG00000002865_8-5	3	ENSMFAG00000002865_1:25330660-25330760	ENSMFAG00000002865_1:25339233-25339421	ENSG00000143190_1:167365467-167365567	ENSG00000143190_1:167374108-167374296	NA	Macaca	9541
ENSMFAG00000002902_3-3	1	ENSMFAG00000002902_3:97596090-97596318	ENSMFAG00000002902_3:97596090-97596318	ENSG00000136243_7:23185070-23185298	ENSG00000136243_7:23185070-23185298	NA	Macaca	9541
ENSMFAG00000002922_11-9	3	ENSMFAG00000002922_X:14810636-14810699	ENSMFAG00000002922_X:14819755-14819849	ENSG00000169891_X:17052382-17052445	ENSG00000169891_X:17062438-17062532	NA	Macaca	9541
ENSMFAG00000003018_13-10	3	ENSMFAG00000003018_17:93561001-93561089	ENSMFAG00000003018_17:93572470-93572565	ENSG00000102606_13:111233205-111233293	ENSG00000102606_13:111244199-111244294	NA	Macaca	9541
ENSMFAG00000003018_20-10	8	ENSMFAG00000003018_17:93561001-93561089	ENSMFAG00000003018_17:93605710-93605796	ENSG00000102606_13:111233205-111233293	ENSG00000102606_13:111277587-111277673	NA	Macaca	9541
ENSMFAG00000003036_9-3	7	ENSMFAG00000003036_1:31753993-31754092	ENSMFAG00000003036_1:31763881-31763987	ENSG00000117593_1:173826687-173826786	ENSG00000117593_1:173836940-173837046	NA	Macaca	9541
ENSMFAG00000003036_9-4	6	ENSMFAG00000003036_1:31755909-31755975	ENSMFAG00000003036_1:31763881-31763987	ENSG00000117593_1:173826687-173828399	ENSG00000117593_1:173836940-173837046	NA	Macaca	9541
ENSMFAG00000003174_13-3	7	ENSMFAG00000003174_16:80145903-80145983	ENSMFAG00000003174_16:80171287-80171416	ENSG00000141562_17:82459992-82460072	ENSG00000141562_17:82480468-82481211	NA	Macaca	9541
ENSMFAG00000003278_8-7	2	ENSMFAG00000003278_8:17257008-17257122	ENSMFAG00000003278_8:17257603-17257703	ENSG00000155975_8:17268258-17268372	ENSG00000155975_8:17268856-17268956	NA	Macaca	9541
ENSMFAG00000003450_10-10	1	ENSMFAG00000003450_12:89620626-89620872	ENSMFAG00000003450_12:89620626-89620872	ENSG00000196141_2:200419250-200419496	ENSG00000196141_2:200419250-200419496	NA	Macaca	9541
ENSMFAG00000003510_30-17	13	ENSMFAG00000003510_12:67360947-67361054	ENSMFAG00000003510_12:67383980-67384102	ENSG00000079156_2:178372126-178372233	ENSG00000079156_2:178394313-178394435	NA	Macaca	9541
ENSMFAG00000003582_23-21	3	ENSMFAG00000003582_9:114483853-114484066	ENSMFAG00000003582_9:114503528-114503746	ENSG00000107518_10:115300034-115300247	ENSG00000107518_10:115315518-115315736	NA	Macaca	9541
ENSMFAG00000003599_20-13	8	ENSMFAG00000003599_1:66124398-66124796	ENSMFAG00000003599_1:66146182-66146267	ENSG00000203710_1:207542182-207542580	ENSG00000203710_1:207575595-207575680	NA	Macaca	9541
ENSMFAG00000003726_12-10	3	ENSMFAG00000003726_1:60813102-60813181	ENSMFAG00000003726_1:60817005-60817117	ENSG00000077157_1:202430731-202430810	ENSG00000077157_1:202434656-202434768	NA	Macaca	9541
ENSMFAG00000003726_12-7	6	ENSMFAG00000003726_1:60807674-60807833	ENSMFAG00000003726_1:60817005-60817117	ENSG00000077157_1:202425566-202425725	ENSG00000077157_1:202434656-202434768	NA	Macaca	9541
ENSMFAG00000003726_21-3	12	ENSMFAG00000003726_1:60798892-60799022	ENSMFAG00000003726_1:60831349-60831531	ENSG00000077157_1:202416787-202416917	ENSG00000077157_1:202448989-202449171	NA	Macaca	9541
ENSMFAG00000003879_10-2	9	ENSMFAG00000003879_7:113903191-113903261	ENSMFAG00000003879_7:113928977-113929049	ENSG00000197776_14:49709159-49709229	ENSG00000197776_14:49734589-49734661	NA	Macaca	9541
ENSMFAG00000004053_18-9	8	ENSMFAG00000004053_14:104299576-104299745	ENSMFAG00000004053_14:104313955-104314154	ENSG00000149311_11:108248933-108249102	ENSG00000149311_11:108268410-108268609	NA	Macaca	9541
ENSMFAG00000008415_3-3	1	ENSMFAG00000008415_14:110080865-110082222	ENSMFAG00000008415_14:110080865-110082222	ENSG00000109906_11:114063211-114064568	ENSG00000109906_11:114063211-114064568	NA	Macaca	9541
ENSMFAG00000008589_18-18	2	ENSMFAG00000008589_3:102085935-102086198	ENSMFAG00000008589_3:102085884-102086198	ENSG00000048052_7:18666213-18666476	ENSG00000048052_7:18666213-18666476	NA	Macaca	9541
ENSMFAG00000015722_45-43	3	ENSMFAG00000015722_13:67133294-67133412	ENSMFAG00000015722_13:67138274-67138427	ENSG00000115970_2:43291696-43292222	ENSG00000115970_2:43286908-43287061	NA	Macaca	9541
ENSMFAG00000016489_19-18	2	ENSMFAG00000016489_11:19115594-19115687	ENSMFAG00000016489_11:19118588-19118682	ENSG00000139144_12:18420941-18421034	ENSG00000139144_12:18423945-18424039	NA	Macaca	9541
ENSMFAG00000020572_22-17	6	ENSMFAG00000020572_9:92798300-92798407	ENSMFAG00000020572_9:92812890-92813007	ENSG00000138193_10:94268929-94269036	ENSG00000138193_10:94284848-94284965	NA	Macaca	9541
ENSMFAG00000022133_5-3	3	ENSMFAG00000022133_2:38137686-38139731	ENSMFAG00000022133_2:38137686-38140126	ENSG00000073711_3:136001059-136003493	ENSG00000073711_3:136001059-136003493	NA	Macaca	9541
ENSMFAG00000025538_13-5	7	ENSMFAG00000025538_17:7904488-7904609	ENSMFAG00000025538_17:7996434-7996491	ENSG00000152520_13:28174272-28174393	ENSG00000152520_13:28261401-28261458	NA	Macaca	9541
ENSMFAG00000025835_19-16	3	ENSMFAG00000025835_8:86379395-86379558	ENSMFAG00000025835_8:86385236-86385371	ENSG00000133739_8:85137464-85137627	ENSG00000133739_8:85141382-85141517	NA	Macaca	9541
ENSMFAG00000028903_13-7	6	ENSMFAG00000028903_6:93067359-93067508	ENSMFAG00000028903_6:93084768-93084933	ENSG00000133302_5:94653272-94653421	ENSG00000133302_5:94670843-94671008	NA	Macaca	9541
ENSMFAG00000028903_14-4	10	ENSMFAG00000028903_6:93057630-93057792	ENSMFAG00000028903_6:93092732-93092879	ENSG00000133302_5:94643273-94643435	ENSG00000133302_5:94678399-94678955	NA	Macaca	9541
ENSMFAG00000028903_14-5	9	ENSMFAG00000028903_6:93063841-93063984	ENSMFAG00000028903_6:93092732-93092879	ENSG00000133302_5:94649454-94649597	ENSG00000133302_5:94678399-94678955	NA	Macaca	9541
ENSMFAG00000028903_14-9	6	ENSMFAG00000028903_6:93076060-93076113	ENSMFAG00000028903_6:93092732-93092879	ENSG00000133302_5:94662298-94662351	ENSG00000133302_5:94678399-94678955	NA	Macaca	9541
ENSMFAG00000029801_20-9	10	ENSMFAG00000029801_7:140424267-140424336	ENSMFAG00000029801_7:140462512-140462603	ENSG00000119685_14:75707018-75707087	ENSG00000119685_14:75745488-75745581	NA	Macaca	9541
ENSMFAG00000029801_21-9	11	ENSMFAG00000029801_7:140424267-140424336	ENSMFAG00000029801_7:140503345-140503407	ENSG00000119685_14:75707018-75707087	ENSG00000119685_14:75752893-75752955	NA	Macaca	9541
ENSMFAG00000029801_25-23	3	ENSMFAG00000029801_7:140514757-140514914	ENSMFAG00000029801_7:140521875-140521995	ENSG00000119685_14:75764615-75764772	ENSG00000119685_14:75771734-75771854	NA	Macaca	9541
ENSMFAG00000029801_32-9	22	ENSMFAG00000029801_7:140424267-140424336	ENSMFAG00000029801_7:140542400-140542587	ENSG00000119685_14:75707018-75707087	ENSG00000119685_14:75792913-75793100	NA	Macaca	9541
ENSMFAG00000029801_33-29	5	ENSMFAG00000029801_7:140532258-140532344	ENSMFAG00000029801_7:140566744-140566898	ENSG00000119685_14:75782487-75782573	ENSG00000119685_14:75820007-75820161	NA	Macaca	9541
ENSMFAG00000029801_34-33	2	ENSMFAG00000029801_7:140566744-140566898	ENSMFAG00000029801_7:140616298-140616493	ENSG00000119685_14:75820007-75820161	ENSG00000119685_14:75863667-75863862	NA	Macaca	9541
ENSMFAG00000029838_6-3	4	ENSMFAG00000029838_8:56838927-56839099	ENSMFAG00000029838_8:56845793-56845879	ENSG00000137574_8:55785719-55785891	ENSG00000137574_8:55792698-55792784	NA	Macaca	9541
ENSMFAG00000029861_35-35	1	ENSMFAG00000029861_1:60189780-60189977	ENSMFAG00000029861_1:60189780-60189977	ENSG00000134369_1:201817088-201817285	ENSG00000134369_1:201817088-201817285	NA	Macaca	9541
ENSMFAG00000029975_13-4	10	ENSMFAG00000029975_20:35924266-35924500	ENSMFAG00000029975_20:35972600-35972733	ENSG00000102910_16:48252131-48252365	ENSG00000102910_16:48303172-48303305	NA	Macaca	9541
ENSMFAG00000029975_14-10	5	ENSMFAG00000029975_20:35948547-35948688	ENSMFAG00000029975_20:36007447-36007589	ENSG00000102910_16:48277338-48277479	ENSG00000102910_16:48334216-48334358	NA	Macaca	9541
ENSMFAG00000029976_5-5	1	ENSMFAG00000029976_8:11137605-11137829	ENSMFAG00000029976_8:11137605-11137829	ENSG00000173273_8:9580159-9580383	ENSG00000173273_8:9580159-9580383	NA	Macaca	9541
ENSMFAG00000029995_6-5	2	ENSMFAG00000029995_2:74609478-74609710	ENSMFAG00000029995_2:74613604-74613845	ENSG00000136603_3:170384533-170384627	ENSG00000136603_3:170390223-170390464	NA	Macaca	9541
ENSMFAG00000030094_19-11	9	ENSMFAG00000030094_12:96146831-96146902	ENSMFAG00000030094_12:96161812-96161892	ENSG00000114948_2:206557427-206557498	ENSG00000114948_2:206573115-206573195	NA	Macaca	9541
ENSMFAG00000030100_22-10	12	ENSMFAG00000030100_7:45269531-45269595	ENSMFAG00000030100_7:45370275-45370346	ENSG00000137764_15:67600685-67600749	ENSG00000137764_15:67703337-67703408	NA	Macaca	9541
ENSMFAG00000030100_22-15	8	ENSMFAG00000030100_7:45325994-45326049	ENSMFAG00000030100_7:45370275-45370346	ENSG00000137764_15:67658553-67658614	ENSG00000137764_15:67703337-67703408	NA	Macaca	9541
ENSMFAG00000030100_26-10	15	ENSMFAG00000030100_7:45269531-45269595	ENSMFAG00000030100_7:45415371-45415403	ENSG00000137764_15:67600685-67600749	ENSG00000137764_15:67748368-67748601	NA	Macaca	9541
ENSMFAG00000030100_28-10	17	ENSMFAG00000030100_7:45269531-45269595	ENSMFAG00000030100_7:45439817-45439862	ENSG00000137764_15:67600685-67600749	ENSG00000137764_15:67772707-67772752	NA	Macaca	9541
ENSMFAG00000030410_13-9	5	ENSMFAG00000030410_10:76726251-76726418	ENSMFAG00000030410_10:76749959-76750116	ENSG00000101109_20:44995090-44995257	ENSG00000101109_20:45024973-45025130	NA	Macaca	9541
ENSMFAG00000030410_9-8	2	ENSMFAG00000030410_10:76718236-76718400	ENSMFAG00000030410_10:76726251-76726418	ENSG00000101109_20:44987132-44987296	ENSG00000101109_20:44995090-44995257	NA	Macaca	9541
ENSMFAG00000030557_10-3	8	ENSMFAG00000030557_2:43650147-43650264	ENSMFAG00000030557_2:43693278-43693379	ENSG00000155903_3:141512163-141512280	ENSG00000155903_3:141559894-141559995	NA	Macaca	9541
ENSMFAG00000030595_10-8	1	ENSMFAG00000030595_19:13158854-13158982	ENSMFAG00000030595_19:13158854-13158982	ENSG00000179115_19:12928398-12928663	ENSG00000179115_19:12928398-12928663	NA	Macaca	9541
ENSMFAG00000030644_14-6	9	ENSMFAG00000030644_9:1275753-1275848	ENSMFAG00000030644_9:1300867-1301008	ENSG00000047056_10:1080011-1080106	ENSG00000047056_10:1105126-1105267	NA	Macaca	9541
ENSMFAG00000030644_9-6	4	ENSMFAG00000030644_9:1275753-1275848	ENSMFAG00000030644_9:1282872-1282943	ENSG00000047056_10:1080011-1080106	ENSG00000047056_10:1086286-1086357	NA	Macaca	9541
ENSMFAG00000030689_28-6	18	ENSMFAG00000030689_12:120258164-120258326	ENSMFAG00000030689_12:120289625-120289678	ENSG00000067066_2:230442937-230443099	ENSG00000067066_2:230474394-230474447	NA	Macaca	9541
ENSMFAG00000030719_14-8	4	ENSMFAG00000030719_12:90222872-90222956	ENSMFAG00000030719_12:90223728-90223898	ENSG00000013441_2:200856891-200856985	ENSG00000013441_2:200856891-200857884	NA	Macaca	9541
ENSMFAG00000030921_13-3	11	ENSMFAG00000030921_X:16459636-16459772	ENSMFAG00000030921_X:16498184-16498307	ENSG00000008086_X:18575354-18575414	ENSG00000008086_X:18613152-18613275	NA	Macaca	9541
ENSMFAG00000030926_11-9	3	ENSMFAG00000030926_6:71168317-71168421	ENSMFAG00000030926_6:71181534-71181630	ENSG00000157107_5:73006445-73006549	ENSG00000157107_5:73017212-73017308	NA	Macaca	9541
ENSMFAG00000030934_13-13	1	ENSMFAG00000030934_3:134649042-134650009	ENSMFAG00000030934_3:134649042-134650009	ENSG00000127947_7:77626705-77627675	ENSG00000127947_7:77626705-77627675	NA	Macaca	9541
ENSMFAG00000030972_12-7	6	ENSMFAG00000030972_12:121960870-121961117	ENSMFAG00000030972_12:122085596-122085829	ENSG00000144535_2:232136472-232136719	ENSG00000144535_2:232263207-232263440	NA	Macaca	9541
ENSMFAG00000030972_5-5	1	ENSMFAG00000030972_12:121912619-121912853	ENSMFAG00000030972_12:121912619-121912853	ENSG00000144535_2:232087487-232087721	ENSG00000144535_2:232087487-232087721	NA	Macaca	9541
ENSMFAG00000030975_26-20	7	ENSMFAG00000030975_7:65860108-65860162	ENSMFAG00000030975_7:65887824-65887890	ENSG00000170776_15:85682158-85682212	ENSG00000170776_15:85710443-85710645	NA	Macaca	9541
ENSMFAG00000031123_23-6	15	ENSMFAG00000031123_8:105046952-105047877	ENSMFAG00000031123_8:105180139-105180248	ENSG00000176406_8:103885298-103886223	ENSG00000176406_8:104014506-104014615	NA	Macaca	9541
ENSMFAG00000031123_24-7	15	ENSMFAG00000031123_8:105072620-105072687	ENSMFAG00000031123_8:105181072-105181104	ENSG00000176406_8:103910134-103910201	ENSG00000176406_8:104015424-104015456	NA	Macaca	9541
ENSMFAG00000031123_6-6	1	ENSMFAG00000031123_8:105046952-105047877	ENSMFAG00000031123_8:105046952-105047877	ENSG00000176406_8:103885298-103886223	ENSG00000176406_8:103885298-103886223	NA	Macaca	9541
ENSMFAG00000031206_6-4	3	ENSMFAG00000031206_20:4917533-4917621	ENSMFAG00000031206_20:4922886-4923003	ENSG00000102858_16:4651963-4652051	ENSG00000102858_16:4657246-4657363	NA	Macaca	9541
ENSMFAG00000031221_6-3	4	ENSMFAG00000031221_7:36237093-36237219	ENSMFAG00000031221_7:36252268-36252587	ENSG00000157450_15:59052305-59052431	ENSG00000157450_15:59066764-59067083	NA	Macaca	9541
ENSMFAG00000031281_25-5	17	ENSMFAG00000031281_4:57026666-57026750	ENSMFAG00000031281_4:57107809-57107949	ENSG00000120254_6:150876090-150876174	ENSG00000120254_6:150960275-150960415	NA	Macaca	9541
ENSMFAG00000031281_28-21	9	ENSMFAG00000031281_4:57093571-57093678	ENSMFAG00000031281_4:57158284-57158423	ENSG00000120254_6:150944486-150944593	ENSG00000120254_6:151009819-151009958	NA	Macaca	9541
ENSMFAG00000031352_12-5	8	ENSMFAG00000031352_14:117531082-117531243	ENSMFAG00000031352_14:117566173-117566246	ENSG00000137642_11:121488032-121488193	ENSG00000137642_11:121522916-121522989	NA	Macaca	9541
ENSMFAG00000031368_17-7	11	ENSMFAG00000031368_1:192913085-192913259	ENSMFAG00000031368_1:192935865-192936018	ENSG00000163867_1:35014988-35015162	ENSG00000163867_1:34992234-34992387	NA	Macaca	9541
ENSMFAG00000031374_30-19	12	ENSMFAG00000031374_8:69315204-69315289	ENSMFAG00000031374_8:69347908-69348036	ENSG00000046889_8:68087724-68087809	ENSG00000046889_8:68120921-68121049	NA	Macaca	9541
ENSMFAG00000031605_11-7	4	ENSMFAG00000031605_9:18957759-18957878	ENSMFAG00000031605_9:19067793-19067869	ENSG00000165995_10:18401924-18402043	ENSG00000165995_10:18506471-18506547	NA	Macaca	9541
ENSMFAG00000031733_11-10	2	ENSMFAG00000031733_9:27591108-27592014	ENSMFAG00000031733_9:27591108-27592247	ENSG00000120539_10:27169944-27171083	ENSG00000120539_10:27169944-27171083	NA	Macaca	9541
ENSMFAG00000031733_13-3	9	ENSMFAG00000031733_9:27579603-27579740	ENSMFAG00000031733_9:27593574-27593715	ENSG00000120539_10:27158549-27158686	ENSG00000120539_10:27173118-27173259	NA	Macaca	9541
ENSMFAG00000031775_25-17	8	ENSMFAG00000031775_9:22206804-22206848	ENSMFAG00000031775_9:22240369-22240581	ENSG00000078403_10:21681332-21681376	ENSG00000078403_10:21713772-21713950	NA	Macaca	9541
ENSMFAG00000031793_11-7	5	ENSMFAG00000031793_1:43128951-43129010	ENSMFAG00000031793_1:43133455-43133643	ENSG00000116668_1:185180391-185180450	ENSG00000116668_1:185184743-185184931	NA	Macaca	9541
ENSMFAG00000031793_20-2	17	ENSMFAG00000031793_1:43109288-43109380	ENSMFAG00000031793_1:43217648-43217712	ENSG00000116668_1:185160833-185160925	ENSG00000116668_1:185276604-185276668	NA	Macaca	9541
ENSMFAG00000031930_21-8	12	ENSMFAG00000031930_4:13613677-13613833	ENSMFAG00000031930_4:13657806-13657944	ENSG00000112367_6:109727109-109727265	ENSG00000112367_6:109776922-109777060	NA	Macaca	9541
ENSMFAG00000031930_27-8	18	ENSMFAG00000031930_4:13613677-13613833	ENSMFAG00000031930_4:13676233-13676319	ENSG00000112367_6:109727109-109727265	ENSG00000112367_6:109796765-109796851	NA	Macaca	9541
ENSMFAG00000031957_7-5	3	ENSMFAG00000031957_20:10715021-10715145	ENSMFAG00000031957_20:10721978-10722076	ENSG00000166669_16:10433525-10433649	ENSG00000166669_16:10440364-10440462	NA	Macaca	9541
ENSMFAG00000031990_19-11	7	ENSMFAG00000031990_12:57710300-57710398	ENSMFAG00000031990_12:57734246-57734371	ENSG00000163072_2:168834227-168834325	ENSG00000163072_2:168859109-168859637	NA	Macaca	9541
ENSMFAG00000032033_13-9	4	ENSMFAG00000032033_11:33145652-33145835	ENSMFAG00000032033_11:33171906-33172062	ENSG00000139132_12:32576266-32576298	ENSG00000139132_12:32602161-32602317	NA	Macaca	9541
ENSMFAG00000032056_3-3	1	ENSMFAG00000032056_8:81650886-81651774	ENSMFAG00000032056_8:81650886-81651774	ENSG00000205189_8:80499494-80500382	ENSG00000205189_8:80499494-80500382	NA	Macaca	9541
ENSMFAG00000032121_8-4	5	ENSMFAG00000032121_19:45803336-45803362	ENSMFAG00000032121_19:45804369-45804448	ENSG00000104859_19:45052071-45052168	ENSG00000104859_19:45052800-45053177	NA	Macaca	9541
ENSMFAG00000032152_11-2	7	ENSMFAG00000032152_X:16580722-16580808	ENSMFAG00000032152_X:16644452-16644498	ENSG00000086717_X:18697845-18697931	ENSG00000086717_X:18761530-18761576	NA	Macaca	9541
ENSMFAG00000032152_16-9	8	ENSMFAG00000032152_X:16633292-16633452	ENSMFAG00000032152_X:16670601-16670753	ENSG00000086717_X:18749792-18749952	ENSG00000086717_X:18789121-18789273	NA	Macaca	9541
ENSMFAG00000032301_21-21	1	ENSMFAG00000032301_6:65898546-65900088	ENSMFAG00000032301_6:65898546-65900088	ENSG00000112851_5:66053406-66054951	ENSG00000112851_5:66053406-66054951	NA	Macaca	9541
ENSMFAG00000032362_18-8	9	ENSMFAG00000032362_6:74788296-74788363	ENSMFAG00000032362_6:74811332-74811495	ENSG00000145703_5:76588906-76588973	ENSG00000145703_5:76611020-76611183	NA	Macaca	9541
ENSMFAG00000032370_4-4	1	ENSMFAG00000032370_17:10223639-10224278	ENSMFAG00000032370_17:10223639-10224278	ENSG00000132952_13:30630835-30631474	ENSG00000132952_13:30630835-30631474	NA	Macaca	9541
ENSMFAG00000032585_19-19	1	ENSMFAG00000032585_13:83243026-83243220	ENSMFAG00000032585_13:83243026-83243220	ENSG00000243943_2:27607845-27608039	ENSG00000243943_2:27607845-27608039	NA	Macaca	9541
ENSMFAG00000032645_13-12	2	ENSMFAG00000032645_11:125175597-125175662	ENSMFAG00000032645_11:125175747-125175896	ENSG00000089041_12:121177147-121177446	ENSG00000089041_12:121177147-121177446	NA	Macaca	9541
ENSMFAG00000032698_19-11	9	ENSMFAG00000032698_3:38983727-38983921	ENSMFAG00000032698_3:39038841-39039022	ENSG00000146555_7:3962657-3962851	ENSG00000146555_7:4017171-4017352	NA	Macaca	9541
ENSMFAG00000032738_24-19	6	ENSMFAG00000032738_4:61134933-61135126	ENSMFAG00000032738_4:61149247-61149391	ENSG00000213079_6:154810015-154810208	ENSG00000213079_6:154824234-154824378	NA	Macaca	9541
ENSMFAG00000032923_8-6	3	ENSMFAG00000032923_4:40460908-40461059	ENSMFAG00000032923_4:40464809-40464904	ENSG00000171408_6:136147351-136147502	ENSG00000171408_6:136151160-136151255	NA	Macaca	9541
ENSMFAG00000032999_15-10	5	ENSMFAG00000032999_11:1163003-1163170	ENSMFAG00000032999_11:1226267-1226278	ENSG00000082805_12:1141620-1141787	ENSG00000082805_12:1204501-1204512	NA	Macaca	9541
ENSMFAG00000032999_18-11	7	ENSMFAG00000032999_11:1204118-1204255	ENSMFAG00000032999_11:1325835-1325995	ENSG00000082805_12:1180540-1180677	ENSG00000082805_12:1289852-1290012	NA	Macaca	9541
ENSMFAG00000032999_19-11	8	ENSMFAG00000032999_11:1204118-1204255	ENSMFAG00000032999_11:1421350-1421494	ENSG00000082805_12:1180540-1180677	ENSG00000082805_12:1371833-1371977	NA	Macaca	9541
ENSMFAG00000033013_3-3	1	ENSMFAG00000033013_9:60434307-60434899	ENSMFAG00000033013_9:60434307-60434899	ENSG00000156671_10:75150514-75151106	ENSG00000156671_10:75150514-75151106	NA	Macaca	9541
ENSMFAG00000033101_20-14	6	ENSMFAG00000033101_17:24712540-24712645	ENSMFAG00000033101_17:24734777-24734852	ENSG00000136152_13:45503244-45503349	ENSG00000136152_13:45524976-45525051	NA	Macaca	9541
ENSMFAG00000033102_6-3	4	ENSMFAG00000033102_5:24451139-24451339	ENSMFAG00000033102_5:24456895-24456962	ENSG00000038210_4:25255065-25255265	ENSG00000038210_4:25260524-25260591	NA	Macaca	9541
ENSMFAG00000033259_6-3	4	ENSMFAG00000033259_20:19111277-19111406	ENSMFAG00000033259_20:19142719-19142796	ENSG00000174628_16:19733698-19733827	ENSG00000174628_16:19763848-19764112	NA	Macaca	9541
ENSMFAG00000033259_6-5	2	ENSMFAG00000033259_20:19142532-19142584	ENSMFAG00000033259_20:19142719-19142796	ENSG00000174628_16:19763848-19763900	ENSG00000174628_16:19763848-19764112	NA	Macaca	9541
ENSMFAG00000033376_7-5	3	ENSMFAG00000033376_6:179475844-179475945	ENSMFAG00000033376_6:179485528-179485589	ENSG00000176783_5:179567461-179567562	ENSG00000176783_5:179577075-179577136	NA	Macaca	9541
ENSMFAG00000033625_20-12	9	ENSMFAG00000033625_2:106352836-106352896	ENSMFAG00000033625_2:106422643-106422740	ENSG00000088538_3:51159244-51159304	ENSG00000088538_3:51229512-51229609	NA	Macaca	9541
ENSMFAG00000033642_12-11	3	ENSMFAG00000033642_7:20366183-20366348	ENSMFAG00000033642_7:20366600-20366724	ENSG00000137822_15:43385791-43385916	ENSG00000137822_15:43386206-43386330	NA	Macaca	9541
ENSMFAG00000033724_9-4	6	ENSMFAG00000033724_20:69627650-69627867	ENSMFAG00000033724_20:69635201-69635329	ENSG00000261609_16:81356785-81357002	ENSG00000261609_16:81365350-81365478	NA	Macaca	9541
ENSMFAG00000033753_21-8	13	ENSMFAG00000033753_17:14513560-14513655	ENSMFAG00000033753_17:14588591-14588683	ENSG00000172915_13:35045306-35045401	ENSG00000172915_13:35123482-35123574	NA	Macaca	9541
ENSMFAG00000033753_47-41	7	ENSMFAG00000033753_17:14753344-14753405	ENSMFAG00000033753_17:14932047-14932183	ENSG00000172915_13:35290389-35290450	ENSG00000172915_13:35472400-35472536	NA	Macaca	9541
ENSMFAG00000033900_11-10	2	ENSMFAG00000033900_1:31683095-31683210	ENSMFAG00000033900_1:31684462-31684645	ENSG00000076321_1:173755923-173756038	ENSG00000076321_1:173756976-173757159	NA	Macaca	9541
ENSMFAG00000033900_13-13	2	ENSMFAG00000033900_1:31689432-31689575	ENSMFAG00000033900_1:31689405-31689575	ENSG00000076321_1:173766146-173766289	ENSG00000076321_1:173766146-173766289	NA	Macaca	9541
ENSMFAG00000033900_19-10	8	ENSMFAG00000033900_1:31683095-31683210	ENSMFAG00000033900_1:31706308-31706414	ENSG00000076321_1:173755923-173756038	ENSG00000076321_1:173781913-173782230	NA	Macaca	9541
ENSMFAG00000033929_15-3	10	ENSMFAG00000033929_7:94459106-94459146	ENSMFAG00000033929_7:94480297-94480429	ENSG00000092140_14:30581076-30581116	ENSG00000092140_14:30601999-30602131	NA	Macaca	9541
ENSMFAG00000033959_35-24	10	ENSMFAG00000033959_6:66986761-66986969	ENSMFAG00000033959_6:67010162-67010284	ENSG00000069020_5:67130210-67130418	ENSG00000069020_5:67153458-67153580	NA	Macaca	9541
ENSMFAG00000033959_35-34	2	ENSMFAG00000033959_6:67009336-67009565	ENSMFAG00000033959_6:67010162-67010284	ENSG00000069020_5:67152637-67152866	ENSG00000069020_5:67153458-67153580	NA	Macaca	9541
ENSMFAG00000033978_14-12	4	ENSMFAG00000033978_16:27365711-27365778	ENSMFAG00000033978_16:27367124-27367281	ENSG00000196712_17:31181422-31181489	ENSG00000196712_17:31182508-31182665	NA	Macaca	9541
ENSMFAG00000033978_45-17	28	ENSMFAG00000033978_16:27388622-27388795	ENSMFAG00000033978_16:27450711-27450821	ENSG00000196712_17:31200422-31200595	ENSG00000196712_17:31265229-31265339	NA	Macaca	9541
ENSMFAG00000033991_13-4	9	ENSMFAG00000033991_5:37454516-37454622	ENSMFAG00000033991_5:37468397-37468526	ENSG00000169299_4:37834618-37834724	ENSG00000169299_4:37848522-37848651	NA	Macaca	9541
ENSMFAG00000034125_5-5	1	ENSMFAG00000034125_3:14271875-14272027	ENSMFAG00000034125_3:14271875-14272027	ENSG00000166979_21:32467696-32467848	ENSG00000166979_21:32467696-32467848	NA	Macaca	9541
ENSMFAG00000034230_13-9	5	ENSMFAG00000034230_10:80806332-80806422	ENSMFAG00000034230_10:80811516-80811645	ENSG00000124207_20:49067190-49067280	ENSG00000124207_20:49072568-49072697	NA	Macaca	9541
ENSMFAG00000034236_12-7	6	ENSMFAG00000034236_8:51355774-51355831	ENSMFAG00000034236_8:51429734-51429864	ENSG00000147481_8:50449668-50449725	ENSG00000147481_8:50536678-50536808	NA	Macaca	9541
ENSMFAG00000034311_8-6	3	ENSMFAG00000034311_16:80478000-80478132	ENSMFAG00000034311_16:80498110-80498242	ENSG00000141556_17:82781589-82781721	ENSG00000141556_17:82800864-82800996	NA	Macaca	9541
ENSMFAG00000034332_14-7	8	ENSMFAG00000034332_1:32202182-32202339	ENSMFAG00000034332_1:32328791-32328941	ENSG00000152061_1:174250475-174250632	ENSG00000152061_1:174393995-174394145	NA	Macaca	9541
ENSMFAG00000034347_24-20	5	ENSMFAG00000034347_6:170775692-170775800	ENSMFAG00000034347_6:170822513-170822595	ENSG00000204764_5:171183322-171183430	ENSG00000204764_5:171221758-171221840	NA	Macaca	9541
ENSMFAG00000034347_26-20	7	ENSMFAG00000034347_6:170775692-170775800	ENSMFAG00000034347_6:170842221-170842359	ENSG00000204764_5:171183322-171183430	ENSG00000204764_5:171242682-171242820	NA	Macaca	9541
ENSMFAG00000034347_27-25	3	ENSMFAG00000034347_6:170840471-170840685	ENSMFAG00000034347_6:170865996-170866162	ENSG00000204764_5:171240928-171241142	ENSG00000204764_5:171265681-171265847	NA	Macaca	9541
ENSMFAG00000034393_8-3	6	ENSMFAG00000034393_7:72475654-72476119	ENSMFAG00000034393_7:72690483-72690621	ENSG00000176463_15:91915993-91916458	ENSG00000176463_15:92128351-92128489	NA	Macaca	9541
ENSMFAG00000034484_5-3	3	ENSMFAG00000034484_14:113194511-113194556	ENSMFAG00000034484_14:113195708-113195767	ENSG00000167257_11:117238601-117238646	ENSG00000167257_11:117238601-117239860	NA	Macaca	9541
ENSMFAG00000034665_18-12	7	ENSMFAG00000034665_8:100275596-100275691	ENSMFAG00000034665_8:100300111-100300305	ENSG00000132549_8:99134632-99134727	ENSG00000132549_8:99156549-99156743	NA	Macaca	9541
ENSMFAG00000034665_48-39	10	ENSMFAG00000034665_8:100790054-100790741	ENSMFAG00000034665_8:100927048-100927209	ENSG00000132549_8:99641811-99642498	ENSG00000132549_8:99784315-99784476	NA	Macaca	9541
ENSMFAG00000034679_11-3	8	ENSMFAG00000034679_14:78632792-78632980	ENSMFAG00000034679_14:78647329-78647434	ENSG00000165494_11:83163679-83163867	ENSG00000165494_11:83177714-83177819	NA	Macaca	9541
ENSMFAG00000035359_8-8	1	ENSMFAG00000035359_11:32874368-32875462	ENSMFAG00000035359_11:32874368-32875462	ENSG00000151746_12:32327461-32328555	ENSG00000151746_12:32327461-32328555	NA	Macaca	9541
ENSMFAG00000035372_10-5	6	ENSMFAG00000035372_1:30012287-30012385	ENSMFAG00000035372_1:30028150-30028288	ENSG00000197959_1:172032402-172032500	ENSG00000197959_1:172048612-172048750	NA	Macaca	9541
ENSMFAG00000035387_46-32	15	ENSMFAG00000035387_11:38741915-38742116	ENSMFAG00000035387_11:38802138-38802210	ENSG00000188906_12:40313972-40314173	ENSG00000188906_12:40356115-40356187	NA	Macaca	9541
ENSMFAG00000035392_8-4	5	ENSMFAG00000035392_7:138293869-138293978	ENSMFAG00000035392_7:138312775-138312915	ENSG00000119661_14:73658847-73658956	ENSG00000119661_14:73689375-73689515	NA	Macaca	9541
ENSMFAG00000035527_17-6	12	ENSMFAG00000035527_8:43987330-43987397	ENSMFAG00000035527_8:44040008-44040042	ENSG00000168172_8:42950388-42950455	ENSG00000168172_8:43002107-43002141	NA	Macaca	9541
ENSMFAG00000035548_11-3	10	ENSMFAG00000035548_8:29441124-29441600	ENSMFAG00000035548_8:29521155-29521249	ENSG00000147421_8:28970043-28970519	ENSG00000147421_8:29048954-29049048	NA	Macaca	9541
ENSMFAG00000035553_20-8	11	ENSMFAG00000035553_9:45564039-45564167	ENSMFAG00000035553_9:45599730-45600437	ENSG00000225830_10:49500538-49506480	ENSG00000225830_10:49470182-49470889	NA	Macaca	9541
ENSMFAG00000035814_4-4	1	ENSMFAG00000035814_17:12620671-12621772	ENSMFAG00000035814_17:12620671-12621772	ENSG00000133116_13:33060679-33061780	ENSG00000133116_13:33060679-33061780	NA	Macaca	9541
ENSMFAG00000035871_2-2	1	ENSMFAG00000035871_3:52328322-52328534	ENSMFAG00000035871_3:52328322-52328534	ENSG00000158321_7:69899286-69899498	ENSG00000158321_7:69899286-69899498	NA	Macaca	9541
ENSMFAG00000036106_23-22	2	ENSMFAG00000036106_16:59844148-59844245	ENSMFAG00000036106_16:59845790-59845871	ENSG00000146872_17:62578477-62578574	ENSG00000146872_17:62580111-62580192	NA	Macaca	9541
ENSMFAG00000036106_28-10	15	ENSMFAG00000036106_16:59803808-59803975	ENSMFAG00000036106_16:59867960-59868098	ENSG00000146872_17:62536170-62536337	ENSG00000146872_17:62602042-62602180	NA	Macaca	9541
ENSMFAG00000036178_12-6	6	ENSMFAG00000036178_4:36027958-36028055	ENSMFAG00000036178_4:36038447-36038555	ENSG00000197594_6:131854926-131855023	ENSG00000197594_6:131868018-131868126	NA	Macaca	9541
ENSMFAG00000036178_24-6	18	ENSMFAG00000036178_4:36027958-36028055	ENSMFAG00000036178_4:36057131-36057293	ENSG00000197594_6:131854926-131855023	ENSG00000197594_6:131886562-131886724	NA	Macaca	9541
ENSMFAG00000036202_3-3	1	ENSMFAG00000036202_16:31351639-31352189	ENSMFAG00000036202_16:31351639-31352189	ENSG00000005156_17:34983002-34983552	ENSG00000005156_17:34983002-34983552	NA	Macaca	9541
ENSMFAG00000036303_10-6	5	ENSMFAG00000036303_12:102836007-102836102	ENSMFAG00000036303_12:102888097-102888214	ENSG00000144451_2:213297262-213297357	ENSG00000144451_2:213350528-213350645	NA	Macaca	9541
ENSMFAG00000036303_8-6	3	ENSMFAG00000036303_12:102836007-102836102	ENSMFAG00000036303_12:102857516-102857653	ENSG00000144451_2:213297262-213297357	ENSG00000144451_2:213317219-213317356	NA	Macaca	9541
ENSMFAG00000036303_9-6	4	ENSMFAG00000036303_12:102836007-102836102	ENSMFAG00000036303_12:102881460-102881567	ENSG00000144451_2:213297262-213297357	ENSG00000144451_2:213340163-213340270	NA	Macaca	9541
ENSMFAG00000036313_14-3	9	ENSMFAG00000036313_7:131272037-131272094	ENSMFAG00000036313_7:131464566-131464700	ENSG00000171723_14:66776464-66776521	ENSG00000171723_14:66965191-66965325	NA	Macaca	9541
ENSMFAG00000036313_30-24	7	ENSMFAG00000036313_7:131599812-131599904	ENSMFAG00000036313_7:131652548-131652635	ENSG00000171723_14:67088983-67089075	ENSG00000171723_14:67143001-67143449	NA	Macaca	9541
ENSMFAG00000036370_10-4	6	ENSMFAG00000036370_8:95968841-95968981	ENSMFAG00000036370_8:95983095-95983195	ENSG00000164941_8:94827263-94827403	ENSG00000164941_8:94841491-94841591	NA	Macaca	9541
ENSMFAG00000036370_11-3	8	ENSMFAG00000036370_8:95966788-95966962	ENSMFAG00000036370_8:95983912-95984053	ENSG00000164941_8:94824893-94825067	ENSG00000164941_8:94842347-94842488	NA	Macaca	9541
ENSMFAG00000036417_5-5	1	ENSMFAG00000036417_1:212914340-212914679	ENSMFAG00000036417_1:212914340-212914679	ENSG00000116138_1:15536475-15536814	ENSG00000116138_1:15536475-15536814	NA	Macaca	9541
ENSMFAG00000036425_6-3	4	ENSMFAG00000036425_1:36991324-36991410	ENSMFAG00000036425_1:37005315-37005506	ENSG00000116199_1:179050279-179050316	ENSG00000116199_1:179064305-179064496	NA	Macaca	9541
ENSMFAG00000036607_10-2	9	ENSMFAG00000036607_9:91091373-91091505	ENSMFAG00000036607_9:91109741-91109829	ENSG00000138160_10:92606265-92606397	ENSG00000138160_10:92621385-92621473	NA	Macaca	9541
ENSMFAG00000036607_16-16	1	ENSMFAG00000036607_9:91126499-91126657	ENSMFAG00000036607_9:91126499-91126657	ENSG00000138160_10:92637387-92637545	ENSG00000138160_10:92637387-92637545	NA	Macaca	9541
ENSMFAG00000036631_15-5	11	ENSMFAG00000036631_3:166985404-166985485	ENSMFAG00000036631_3:167038700-167038795	ENSG00000155530_7:134148238-134148319	ENSG00000155530_7:134201481-134201576	NA	Macaca	9541
ENSMFAG00000036631_18-7	12	ENSMFAG00000036631_3:167000043-167000186	ENSMFAG00000036631_3:167080289-167080414	ENSG00000155530_7:134163397-134163540	ENSG00000155530_7:134248951-134249076	NA	Macaca	9541
ENSMFAG00000036776_22-14	9	ENSMFAG00000036776_5:3227711-3227834	ENSMFAG00000036776_5:3234030-3234130	ENSG00000197386_4:3129924-3129999	ENSG00000197386_4:3136226-3136326	NA	Macaca	9541
ENSMFAG00000036799_5-4	2	ENSMFAG00000036799_10:75677617-75677682	ENSMFAG00000036799_10:75711100-75711345	ENSG00000124191_20:43973367-43973432	ENSG00000124191_20:44006547-44006792	NA	Macaca	9541
ENSMFAG00000036911_7-3	4	ENSMFAG00000036911_8:31046266-31046343	ENSMFAG00000036911_8:31117395-31117525	ENSG00000157110_8:30474779-30474856	ENSG00000157110_8:30544494-30544624	NA	Macaca	9541
ENSMFAG00000036933_17-5	11	ENSMFAG00000036933_12:121032942-121033112	ENSMFAG00000036933_12:121096423-121096546	ENSG00000135931_2:231214831-231215001	ENSG00000135931_2:231272955-231273078	NA	Macaca	9541
ENSMFAG00000036933_24-5	18	ENSMFAG00000036933_12:121032942-121033112	ENSMFAG00000036933_12:121123105-121123160	ENSG00000135931_2:231214831-231215001	ENSG00000135931_2:231293820-231296253	NA	Macaca	9541
ENSMFAG00000036933_25-18	8	ENSMFAG00000036933_12:121100402-121100541	ENSMFAG00000036933_12:121159520-121159624	ENSG00000135931_2:231276636-231276775	ENSG00000135931_2:231331793-231331897	NA	Macaca	9541
ENSMFAG00000036963_3-3	1	ENSMFAG00000036963_13:16488355-16488535	ENSMFAG00000036963_13:16488355-16488535	ENSG00000188177_2:112299849-112300029	ENSG00000188177_2:112299849-112300029	NA	Macaca	9541
ENSMFAG00000037044_14-8	7	ENSMFAG00000037044_7:122585429-122585519	ENSMFAG00000037044_7:122610817-122610983	ENSG00000032219_14:58306022-58306112	ENSG00000032219_14:58330003-58330169	NA	Macaca	9541
ENSMFAG00000037061_12-4	8	ENSMFAG00000037061_3:172254307-172254408	ENSMFAG00000037061_3:172274755-172274898	ENSG00000157741_7:139251956-139252057	ENSG00000157741_7:139273931-139274074	NA	Macaca	9541
ENSMFAG00000037061_13-9	5	ENSMFAG00000037061_3:172270163-172270292	ENSMFAG00000037061_3:172276914-172276964	ENSG00000157741_7:139269394-139269523	ENSG00000157741_7:139276097-139276147	NA	Macaca	9541
ENSMFAG00000037117_19-5	15	ENSMFAG00000037117_15:98268457-98268678	ENSMFAG00000037117_15:98315547-98315744	ENSG00000196730_9:87604954-87605175	ENSG00000196730_9:87651527-87651724	NA	Macaca	9541
ENSMFAG00000037136_16-6	11	ENSMFAG00000037136_1:37267833-37267984	ENSMFAG00000037136_1:37284680-37284778	ENSG00000057252_1:179335506-179335657	ENSG00000057252_1:179348844-179348942	NA	Macaca	9541
ENSMFAG00000037172_8-3	6	ENSMFAG00000037172_6:5458631-5458689	ENSMFAG00000037172_6:5466624-5466661	ENSG00000164151_5:5436418-5436476	ENSG00000164151_5:5444289-5444326	NA	Macaca	9541
ENSMFAG00000037297_3-3	1	ENSMFAG00000037297_4:15089242-15089695	ENSMFAG00000037297_4:15089242-15089695	ENSG00000112394_6:111177212-111177665	ENSG00000112394_6:111177212-111177665	NA	Macaca	9541
ENSMFAG00000037360_6-3	4	ENSMFAG00000037360_14:108165485-108165689	ENSMFAG00000037360_14:108180676-108180778	ENSG00000197580_11:112179278-112179482	ENSG00000197580_11:112193474-112194755	NA	Macaca	9541
ENSMFAG00000037361_28-26	3	ENSMFAG00000037361_11:61716445-61716607	ENSMFAG00000037361_11:61723095-61723293	ENSG00000061987_12:62549668-62549830	ENSG00000061987_12:62555994-62556192	NA	Macaca	9541
ENSMFAG00000037371_15-4	12	ENSMFAG00000037371_X:74876152-74876641	ENSMFAG00000037371_X:74909013-74909147	ENSG00000165240_X:77988242-77988731	ENSG00000165240_X:78020945-78021079	NA	Macaca	9541
ENSMFAG00000037371_24-15	9	ENSMFAG00000037371_X:74909013-74909147	ENSMFAG00000037371_X:74933592-74933694	ENSG00000165240_X:78020945-78021079	ENSG00000165240_X:78045470-78045572	NA	Macaca	9541
ENSMFAG00000037386_31-21	11	ENSMFAG00000037386_17:12274580-12274703	ENSMFAG00000037386_17:12303247-12303392	ENSG00000083642_13:32732101-32732224	ENSG00000083642_13:32760575-32760720	NA	Macaca	9541
ENSMFAG00000037398_15-14	2	ENSMFAG00000037398_18:60789513-60789656	ENSMFAG00000037398_18:60793020-60793207	ENSG00000141446_18:21536042-21536185	ENSG00000141446_18:21532473-21532660	NA	Macaca	9541
ENSMFAG00000037495_64-28	37	ENSMFAG00000037495_1:43920510-43920640	ENSMFAG00000037495_1:44020303-44020452	ENSG00000143341_1:186001298-186001428	ENSG00000143341_1:186088606-186088755	NA	Macaca	9541
ENSMFAG00000037653_13-10	3	ENSMFAG00000037653_7:18669557-18669783	ENSMFAG00000037653_7:18679212-18679729	ENSG00000174197_15:41727180-41727406	ENSG00000174197_15:41736181-41736698	NA	Macaca	9541
ENSMFAG00000037653_2-2	1	ENSMFAG00000037653_7:18616505-18617635	ENSMFAG00000037653_7:18616505-18617635	ENSG00000174197_15:41668828-41669958	ENSG00000174197_15:41668828-41669958	NA	Macaca	9541
ENSMFAG00000037789_15-4	8	ENSMFAG00000037789_5:184652342-184652558	ENSMFAG00000037789_5:184732576-184732689	ENSG00000109762_4:185258848-185259064	ENSG00000109762_4:185346537-185346650	NA	Macaca	9541
ENSMFAG00000037789_17-13	5	ENSMFAG00000037789_5:184726022-184726153	ENSMFAG00000037789_5:184739837-184739954	ENSG00000109762_4:185339379-185339510	ENSG00000109762_4:185353058-185353602	NA	Macaca	9541
ENSMFAG00000037789_18-13	6	ENSMFAG00000037789_5:184726022-184726153	ENSMFAG00000037789_5:184744029-184744095	ENSG00000109762_4:185339379-185339510	ENSG00000109762_4:185357671-185357737	NA	Macaca	9541
ENSMFAG00000037951_14-7	7	ENSMFAG00000037951_X:19413947-19414066	ENSMFAG00000037951_X:19488319-19488533	ENSG00000149970_X:21490459-21490578	ENSG00000149970_X:21563238-21563452	NA	Macaca	9541
ENSMFAG00000038028_16-8	9	ENSMFAG00000038028_7:167952002-167952163	ENSMFAG00000038028_7:167967827-167968056	ENSG00000089902_14:102707351-102707512	ENSG00000089902_14:102722187-102722416	NA	Macaca	9541
ENSMFAG00000038030_10-8	3	ENSMFAG00000038030_11:82202558-82202643	ENSMFAG00000038030_11:82204457-82204535	ENSG00000179104_12:82965024-82965109	ENSG00000179104_12:82966919-82966997	NA	Macaca	9541
ENSMFAG00000038030_13-10	4	ENSMFAG00000038030_11:82204457-82204535	ENSMFAG00000038030_11:82288933-82289047	ENSG00000179104_12:82966919-82966997	ENSG00000179104_12:83050904-83051018	NA	Macaca	9541
ENSMFAG00000038030_14-8	7	ENSMFAG00000038030_11:82202558-82202643	ENSMFAG00000038030_11:82300159-82300222	ENSG00000179104_12:82965024-82965109	ENSG00000179104_12:83061768-83061831	NA	Macaca	9541
ENSMFAG00000038030_5-5	2	ENSMFAG00000038030_11:82088196-82088766	ENSMFAG00000038030_11:82088125-82088766	ENSG00000179104_12:82857010-82857580	ENSG00000179104_12:82857010-82857580	NA	Macaca	9541
ENSMFAG00000038101_8-4	3	ENSMFAG00000038101_16:18930043-18930109	ENSMFAG00000038101_16:18951042-18951097	ENSG00000141127_17:18872583-18872634	ENSG00000141127_17:18889822-18889877	NA	Macaca	9541
ENSMFAG00000038238_9-3	6	ENSMFAG00000038238_5:127822008-127822085	ENSMFAG00000038238_5:127849202-127849318	ENSG00000077684_4:128831733-128831810	ENSG00000077684_4:128857338-128857454	NA	Macaca	9541
ENSMFAG00000038238_9-4	5	ENSMFAG00000038238_5:127833696-127833781	ENSMFAG00000038238_5:127849202-127849318	ENSG00000077684_4:128842953-128843038	ENSG00000077684_4:128857338-128857454	NA	Macaca	9541
ENSMFAG00000038425_12-10	3	ENSMFAG00000038425_11:110105639-110105761	ENSMFAG00000038425_11:110117536-110117670	ENSG00000013503_12:106393031-106393153	ENSG00000013503_12:106410826-106410960	NA	Macaca	9541
ENSMFAG00000038517_6-2	5	ENSMFAG00000038517_6:63932040-63932135	ENSMFAG00000038517_6:64072571-64072696	ENSG00000164197_5:64212065-64212160	ENSG00000164197_5:64330281-64330406	NA	Macaca	9541
ENSMFAG00000038693_16-6	7	ENSMFAG00000038693_11:44512963-44513029	ENSMFAG00000038693_11:44537843-44537991	ENSG00000189079_12:45836589-45836655	ENSG00000189079_12:45860801-45860949	NA	Macaca	9541
ENSMFAG00000038991_6-5	2	ENSMFAG00000038991_4:20711488-20711589	ENSMFAG00000038991_4:20711726-20711825	ENSG00000196911_6:116692055-116692156	ENSG00000196911_6:116692293-116692392	NA	Macaca	9541
ENSMFAG00000039001_94-75	18	ENSMFAG00000039001_14:99227435-99227500	ENSMFAG00000039001_14:99379756-99379845	ENSG00000187240_11:103280348-103280413	ENSG00000187240_11:103435943-103436032	NA	Macaca	9541
ENSMFAG00000039001_96-92	5	ENSMFAG00000039001_14:99309327-99309443	ENSMFAG00000039001_14:99399627-99399708	ENSG00000187240_11:103358243-103358359	ENSG00000187240_11:103456275-103456356	NA	Macaca	9541
ENSMFAG00000039001_97-82	15	ENSMFAG00000039001_14:99250482-99250642	ENSMFAG00000039001_14:99411310-99411426	ENSG00000187240_11:103303093-103303253	ENSG00000187240_11:103468389-103468705	NA	Macaca	9541
ENSMFAG00000039173_36-20	16	ENSMFAG00000039173_2:33217622-33217717	ENSMFAG00000039173_2:33252848-33252972	ENSG00000017260_3:130967145-130967240	ENSG00000017260_3:131001220-131001314	NA	Macaca	9541
ENSMFAG00000039197_17-6	12	ENSMFAG00000039197_11:102366570-102366753	ENSMFAG00000039197_11:102395980-102396105	ENSG00000120868_12:98659160-98659343	ENSG00000120868_12:98686748-98686873	NA	Macaca	9541
ENSMFAG00000039205_12-10	3	ENSMFAG00000039205_5:39826277-39826432	ENSMFAG00000039205_5:39831552-39831637	ENSG00000078177_4:40117869-40118024	ENSG00000078177_4:40123127-40123212	NA	Macaca	9541
ENSMFAG00000039205_9-8	2	ENSMFAG00000039205_5:39819889-39819977	ENSMFAG00000039205_5:39821846-39821922	ENSG00000078177_4:40112084-40112172	ENSG00000078177_4:40113432-40113508	NA	Macaca	9541
ENSMFAG00000039266_18-15	3	ENSMFAG00000039266_11:98992355-98992686	ENSMFAG00000039266_11:99004260-99004467	ENSG00000028203_12:95282313-95282644	ENSG00000028203_12:95296051-95296258	NA	Macaca	9541
ENSMFAG00000039350_11-8	4	ENSMFAG00000039350_2:58283998-58284191	ENSMFAG00000039350_2:58289343-58289516	ENSG00000163655_3:155910692-155910885	ENSG00000163655_3:155916019-155916192	NA	Macaca	9541
ENSMFAG00000039350_12-8	5	ENSMFAG00000039350_2:58283998-58284191	ENSMFAG00000039350_2:58292867-58292972	ENSG00000163655_3:155910692-155910885	ENSG00000163655_3:155919233-155919338	NA	Macaca	9541
ENSMFAG00000039352_32-11	22	ENSMFAG00000039352_2:109028264-109028433	ENSMFAG00000039352_2:109080598-109080708	ENSG00000157388_3:53702641-53702810	ENSG00000157388_3:53753572-53753682	NA	Macaca	9541
ENSMFAG00000039355_19-9	11	ENSMFAG00000039355_9:88256448-88256559	ENSMFAG00000039355_9:88273224-88273377	ENSG00000138182_10:89716436-89716547	ENSG00000138182_10:89732903-89733056	NA	Macaca	9541
ENSMFAG00000039374_15-3	13	ENSMFAG00000039374_X:147526236-147526308	ENSMFAG00000039374_X:147594119-147594295	ENSG00000171100_X:150592605-150592677	ENSG00000171100_X:150663433-150663609	NA	Macaca	9541
ENSMFAG00000039441_26-26	1	ENSMFAG00000039441_20:16160504-16160711	ENSMFAG00000039441_20:16160504-16160711	ENSG00000103222_16:16111375-16111582	ENSG00000103222_16:16111375-16111582	NA	Macaca	9541
ENSMFAG00000039458_14-7	8	ENSMFAG00000039458_17:55220255-55220363	ENSMFAG00000039458_17:55327319-55327421	ENSG00000083535_13:72827010-72827118	ENSG00000083535_13:72931165-72931267	NA	Macaca	9541
ENSMFAG00000039458_15-11	5	ENSMFAG00000039458_17:55289311-55289476	ENSMFAG00000039458_17:55360318-55360448	ENSG00000083535_13:72893784-72893871	ENSG00000083535_13:72965274-72965404	NA	Macaca	9541
ENSMFAG00000039542_10-6	5	ENSMFAG00000039542_15:86811814-86811957	ENSMFAG00000039542_15:86882291-86882503	ENSG00000099139_9:76023738-76023881	ENSG00000099139_9:76095890-76096102	NA	Macaca	9541
ENSMFAG00000039561_18-14	4	ENSMFAG00000039561_6:77946693-77946769	ENSMFAG00000039561_6:77955003-77955046	ENSG00000164329_5:79648617-79648693	ENSG00000164329_5:79656881-79657001	NA	Macaca	9541
ENSMFAG00000039616_24-20	5	ENSMFAG00000039616_5:183084182-183084337	ENSMFAG00000039616_5:183087530-183087649	ENSG00000168538_4:183691316-183691471	ENSG00000168538_4:183694604-183694723	NA	Macaca	9541
ENSMFAG00000039675_22-20	3	ENSMFAG00000039675_7:94573386-94573465	ENSMFAG00000039675_7:94578843-94578918	ENSG00000092108_14:30702296-30702375	ENSG00000092108_14:30707990-30708065	NA	Macaca	9541
ENSMFAG00000039675_9-2	5	ENSMFAG00000039675_7:94507054-94507124	ENSMFAG00000039675_7:94522026-94522115	ENSG00000092108_14:30628209-30628279	ENSG00000092108_14:30643316-30643405	NA	Macaca	9541
ENSMFAG00000039831_18-13	6	ENSMFAG00000039831_2:99796308-99796384	ENSMFAG00000039831_2:99805610-99805807	ENSG00000163808_3:44801450-44801526	ENSG00000163808_3:44810846-44811043	NA	Macaca	9541
ENSMFAG00000039831_29-9	19	ENSMFAG00000039831_2:99792042-99792167	ENSMFAG00000039831_2:99834651-99834752	ENSG00000163808_3:44797551-44797676	ENSG00000163808_3:44840355-44840456	NA	Macaca	9541
ENSMFAG00000039831_8-8	1	ENSMFAG00000039831_2:99788694-99788903	ENSMFAG00000039831_2:99788694-99788903	ENSG00000163808_3:44794217-44794426	ENSG00000163808_3:44794217-44794426	NA	Macaca	9541
ENSMFAG00000039882_12-9	5	ENSMFAG00000039882_5:126990466-126990555	ENSMFAG00000039882_5:126999051-126999213	ENSG00000164074_4:128020080-128020169	ENSG00000164074_4:128030510-128030672	NA	Macaca	9541
ENSMFAG00000039882_7-2	4	ENSMFAG00000039882_5:126951112-126951196	ENSMFAG00000039882_5:126982164-126982189	ENSG00000164074_4:127984339-127984423	ENSG00000164074_4:128011673-128011700	NA	Macaca	9541
ENSMFAG00000039963_20-20	1	ENSMFAG00000039963_5:147227410-147227569	ENSMFAG00000039963_5:147227410-147227569	ENSG00000071205_4:148046892-148047051	ENSG00000071205_4:148046892-148047051	NA	Macaca	9541
ENSMFAG00000039973_7-4	4	ENSMFAG00000039973_7:50580931-50581010	ENSMFAG00000039973_7:50590373-50590445	ENSG00000140463_15:72709700-72709779	ENSG00000140463_15:72716778-72716850	NA	Macaca	9541
ENSMFAG00000040039_32-11	22	ENSMFAG00000040039_17:11681808-11681909	ENSMFAG00000040039_17:11749622-11749793	ENSG00000073910_13:32136871-32136972	ENSG00000073910_13:32202356-32202527	NA	Macaca	9541
ENSMFAG00000040093_10-10	1	ENSMFAG00000040093_1:199711279-199711876	ENSMFAG00000040093_1:199711279-199711876	ENSG00000204138_1:28473554-28474151	ENSG00000204138_1:28473554-28474151	NA	Macaca	9541
ENSMFAG00000040139_15-8	8	ENSMFAG00000040139_14:115320711-115320798	ENSMFAG00000040139_14:115341110-115341207	ENSG00000110395_11:119277757-119277844	ENSG00000110395_11:119297384-119297481	NA	Macaca	9541
ENSMFAG00000040270_5-2	4	ENSMFAG00000040270_6:159441936-159442294	ENSMFAG00000040270_6:159474440-159474476	ENSG00000113312_5:160010500-160010858	ENSG00000113312_5:160043133-160043169	NA	Macaca	9541
ENSMFAG00000040315_15-5	10	ENSMFAG00000040315_16:20226746-20228325	ENSMFAG00000040315_16:20282507-20282609	ENSG00000128487_17:20204333-20204465	ENSG00000128487_17:20260192-20260294	NA	Macaca	9541
ENSMFAG00000040365_6-2	5	ENSMFAG00000040365_10:76643173-76643366	ENSMFAG00000040365_10:76651784-76651921	ENSG00000101104_20:44912660-44912853	ENSG00000101104_20:44921594-44921731	NA	Macaca	9541
ENSMFAG00000040510_12-7	6	ENSMFAG00000040510_2:51359568-51359760	ENSMFAG00000040510_2:51373361-51373541	ENSG00000163755_3:149145354-149145546	ENSG00000163755_3:149158666-149158846	NA	Macaca	9541
ENSMFAG00000040569_18-16	2	ENSMFAG00000040569_16:49959395-49959516	ENSMFAG00000040569_16:49963455-49963533	ENSG00000275832_17:38482022-38482143	ENSG00000275832_17:38486062-38486140	NA	Macaca	9541
ENSMFAG00000040580_3-3	1	ENSMFAG00000040580_1:34535310-34536381	ENSMFAG00000040580_1:34535310-34536381	ENSG00000116183_1:176594524-176595595	ENSG00000116183_1:176594524-176595595	NA	Macaca	9541
ENSMFAG00000040667_22-17	6	ENSMFAG00000040667_9:26583212-26583414	ENSMFAG00000040667_9:26619310-26619457	ENSG00000095777_10:26088203-26088405	ENSG00000095777_10:26128391-26128538	NA	Macaca	9541
ENSMFAG00000040667_8-7	2	ENSMFAG00000040667_9:26495061-26495165	ENSMFAG00000040667_9:26495732-26495831	ENSG00000095777_10:25996490-25996594	ENSG00000095777_10:25997159-25997258	NA	Macaca	9541
ENSMFAG00000040751_6-6	1	ENSMFAG00000040751_10:10276974-10277381	ENSMFAG00000040751_10:10276974-10277381	ENSG00000196236_22:40881770-40882177	ENSG00000196236_22:40881770-40882177	NA	Macaca	9541
ENSMFAG00000040779_13-11	3	ENSMFAG00000040779_2:142328832-142328922	ENSMFAG00000040779_2:142335744-142335902	ENSG00000197548_3:11340645-11340735	ENSG00000197548_3:11347877-11348035	NA	Macaca	9541
ENSMFAG00000040779_18-11	8	ENSMFAG00000040779_2:142328832-142328922	ENSMFAG00000040779_2:142367268-142367348	ENSG00000197548_3:11340645-11340735	ENSG00000197548_3:11379972-11380052	NA	Macaca	9541
ENSMFAG00000040779_18-5	14	ENSMFAG00000040779_2:142294631-142294748	ENSMFAG00000040779_2:142367268-142367348	ENSG00000197548_3:11306943-11307060	ENSG00000197548_3:11379972-11380052	NA	Macaca	9541
ENSMFAG00000041007_7-3	5	ENSMFAG00000041007_7:109251584-109251718	ENSMFAG00000041007_7:109265094-109265194	ENSG00000198718_14:44999363-44999497	ENSG00000198718_14:45011887-45012075	NA	Macaca	9541
ENSMFAG00000041007_7-4	4	ENSMFAG00000041007_7:109256616-109256918	ENSMFAG00000041007_7:109265094-109265194	ENSG00000198718_14:45004061-45004366	ENSG00000198718_14:45011887-45012075	NA	Macaca	9541
ENSMFAG00000041174_13-5	8	ENSMFAG00000041174_14:89545028-89545152	ENSMFAG00000041174_14:89568726-89568829	ENSG00000166004_11:93668808-93668932	ENSG00000166004_11:93691927-93692030	NA	Macaca	9541
ENSMFAG00000041440_13-10	4	ENSMFAG00000041440_6:69629331-69629385	ENSMFAG00000041440_6:69636496-69636643	ENSG00000145734_5:71483842-71483896	ENSG00000145734_5:71490984-71491131	NA	Macaca	9541
ENSMFAG00000041440_22-19	2	ENSMFAG00000041440_6:69655996-69656137	ENSMFAG00000041440_6:69655996-69657691	ENSG00000145734_5:71509465-71511151	ENSG00000145734_5:71509465-71511151	NA	Macaca	9541
ENSMFAG00000041440_34-29	5	ENSMFAG00000041440_6:69672098-69672299	ENSMFAG00000041440_6:69689137-69689229	ENSG00000145734_5:71522289-71522490	ENSG00000145734_5:71539557-71539649	NA	Macaca	9541
ENSMFAG00000041440_45-37	9	ENSMFAG00000041440_6:69694488-69694638	ENSMFAG00000041440_6:69708655-69708901	ENSG00000145734_5:71544357-71544507	ENSG00000145734_5:71562274-71562520	NA	Macaca	9541
ENSMFAG00000041491_10-5	5	ENSMFAG00000041491_17:79985934-79986197	ENSMFAG00000041491_17:80006122-80006216	ENSG00000139793_13:97346804-97347067	ENSG00000139793_13:97366459-97366553	NA	Macaca	9541
ENSMFAG00000041562_12-8	5	ENSMFAG00000041562_7:42415523-42415627	ENSMFAG00000041562_7:42424193-42424291	ENSG00000166839_15:64926066-64926170	ENSG00000166839_15:64934113-64934234	NA	Macaca	9541
ENSMFAG00000041684_13-6	6	ENSMFAG00000041684_7:47180043-47180148	ENSMFAG00000041684_7:47184697-47184818	ENSG00000137807_15:69421647-69421752	ENSG00000137807_15:69425875-69426457	NA	Macaca	9541
ENSMFAG00000041695_12-8	5	ENSMFAG00000041695_14:71771109-71771284	ENSMFAG00000041695_14:71785157-71785433	ENSG00000158636_11:76458183-76461015	ENSG00000158636_11:76472564-76472840	NA	Macaca	9541
ENSMFAG00000041695_13-12	2	ENSMFAG00000041695_14:71785157-71785433	ENSMFAG00000041695_14:71805190-71805444	ENSG00000158636_11:76472564-76472840	ENSG00000158636_11:76496215-76496469	NA	Macaca	9541
ENSMFAG00000041892_23-20	4	ENSMFAG00000041892_19:18128261-18128416	ENSMFAG00000041892_19:18132101-18132156	ENSG00000130475_19:17783017-17783172	ENSG00000130475_19:17786574-17786629	NA	Macaca	9541
ENSMFAG00000041936_3-3	1	ENSMFAG00000041936_X:116111153-116111325	ENSMFAG00000041936_X:116111153-116111325	ENSG00000077713_X:119410190-119410362	ENSG00000077713_X:119410190-119410362	NA	Macaca	9541
ENSMFAG00000041950_25-25	1	ENSMFAG00000041950_4:98285534-98285961	ENSMFAG00000041950_4:98285534-98285961	ENSG00000112701_6:75702645-75703072	ENSG00000112701_6:75702645-75703072	NA	Macaca	9541
ENSMFAG00000041990_21-12	10	ENSMFAG00000041990_7:122721109-122721276	ENSMFAG00000041990_7:122741182-122741292	ENSG00000100578_14:58450579-58450746	ENSG00000100578_14:58470613-58470723	NA	Macaca	9541
ENSMFAG00000041990_23-13	11	ENSMFAG00000041990_7:122723626-122723749	ENSMFAG00000041990_7:122745203-122745393	ENSG00000100578_14:58453350-58453473	ENSG00000100578_14:58474607-58474797	NA	Macaca	9541
ENSMFAG00000042323_15-7	9	ENSMFAG00000042323_9:119041421-119041619	ENSMFAG00000042323_9:119055740-119055938	ENSG00000198825_10:119796715-119796913	ENSG00000198825_10:119811757-119811955	NA	Macaca	9541
ENSMFAG00000042323_9-3	7	ENSMFAG00000042323_9:119027299-119027435	ENSMFAG00000042323_9:119043232-119043299	ENSG00000198825_10:119781635-119781771	ENSG00000198825_10:119798543-119798610	NA	Macaca	9541
ENSMFAG00000042431_10-3	6	ENSMFAG00000042431_6:107594028-107594201	ENSMFAG00000042431_6:107638362-107638484	ENSG00000151422_5:108832770-108832943	ENSG00000151422_5:108883396-108883518	NA	Macaca	9541
ENSMFAG00000042532_3-3	1	ENSMFAG00000042532_1:112854122-112854304	ENSMFAG00000042532_1:112854122-112854304	ENSG00000118655_1:113908009-113908191	ENSG00000118655_1:113908009-113908191	NA	Macaca	9541
ENSMFAG00000042549_18-15	4	ENSMFAG00000042549_9:119225919-119226110	ENSMFAG00000042549_9:119232031-119232216	ENSG00000107651_10:119926036-119926227	ENSG00000107651_10:119932133-119932318	NA	Macaca	9541
ENSMFAG00000042591_11-4	8	ENSMFAG00000042591_17:5289345-5289487	ENSMFAG00000042591_17:5304202-5304376	ENSG00000139496_13:25307806-25307948	ENSG00000139496_13:25320919-25321093	NA	Macaca	9541
ENSMFAG00000042606_27-7	19	ENSMFAG00000042606_5:93472869-93473046	ENSMFAG00000042606_5:93531671-93531780	ENSG00000163104_4:94226119-94226296	ENSG00000163104_4:94284960-94285069	NA	Macaca	9541
ENSMFAG00000042636_13-8	3	ENSMFAG00000042636_12:92503253-92503442	ENSMFAG00000042636_12:92519524-92519587	ENSG00000138380_2:202961237-202961426	ENSG00000138380_2:202977269-202977332	NA	Macaca	9541
ENSMFAG00000042654_7-4	4	ENSMFAG00000042654_10:72713945-72714068	ENSMFAG00000042654_10:72718926-72719001	ENSG00000198900_20:41076171-41076294	ENSG00000198900_20:41081165-41081240	NA	Macaca	9541
ENSMFAG00000042785_8-7	2	ENSMFAG00000042785_16:42339650-42339807	ENSMFAG00000042785_16:42340138-42340189	ENSG00000153933_17:56848696-56848853	ENSG00000153933_17:56849181-56849232	NA	Macaca	9541
ENSMFAG00000042834_17-9	9	ENSMFAG00000042834_2:84259657-84259728	ENSMFAG00000042834_2:84291529-84291672	ENSG00000058056_3:179730189-179730260	ENSG00000058056_3:179761112-179761255	NA	Macaca	9541
ENSMFAG00000043073_2-2	1	ENSMFAG00000043073_3:76847219-76847431	ENSMFAG00000043073_3:76847219-76847431	ENSG00000164543_7:43595901-43596113	ENSG00000164543_7:43595901-43596113	NA	Macaca	9541
ENSMFAG00000043145_11-10	2	ENSMFAG00000043145_5:121971283-121971437	ENSMFAG00000043145_5:122018206-122018415	ENSG00000145375_4:122979232-122979386	ENSG00000145375_4:123028186-123028395	NA	Macaca	9541
ENSMFAG00000043145_13-10	4	ENSMFAG00000043145_5:121971283-121971437	ENSMFAG00000043145_5:122036220-122036299	ENSG00000145375_4:122979232-122979386	ENSG00000145375_4:123057209-123057288	NA	Macaca	9541
ENSMFAG00000043145_14-11	4	ENSMFAG00000043145_5:122018206-122018415	ENSMFAG00000043145_5:122068418-122068544	ENSG00000145375_4:123028186-123028395	ENSG00000145375_4:123090579-123090705	NA	Macaca	9541
ENSMFAG00000043164_22-20	3	ENSMFAG00000043164_17:91441026-91441143	ENSMFAG00000043164_17:91444234-91444375	ENSG00000041515_13:108961539-108961656	ENSG00000041515_13:108964761-108964902	NA	Macaca	9541
ENSMFAG00000043164_25-12	14	ENSMFAG00000043164_17:91322888-91323038	ENSMFAG00000043164_17:91498056-91498256	ENSG00000041515_13:108844343-108844493	ENSG00000041515_13:109019711-109019911	NA	Macaca	9541
ENSMFAG00000043191_4-4	2	ENSMFAG00000043191_9:112213033-112213134	ENSMFAG00000043191_9:112212422-112213134	ENSG00000148737_10:113040025-113040126	ENSG00000148737_10:113040025-113040126	NA	Macaca	9541
ENSMFAG00000043197_14-3	10	ENSMFAG00000043197_12:61482085-61482226	ENSMFAG00000043197_12:61494067-61494165	ENSG00000152256_2:172558708-172558849	ENSG00000152256_2:172570585-172570824	NA	Macaca	9541
ENSMFAG00000043264_12-8	5	ENSMFAG00000043264_7:70999656-70999756	ENSMFAG00000043264_7:71020030-71020247	ENSG00000140577_15:90607378-90607478	ENSG00000140577_15:90625776-90625993	NA	Macaca	9541
ENSMFAG00000043391_15-2	13	ENSMFAG00000043391_12:112659394-112659452	ENSMFAG00000043391_12:112702984-112703141	ENSG00000123983_2:222887830-222887888	ENSG00000123983_2:222934530-222934687	NA	Macaca	9541
ENSMFAG00000043428_25-3	23	ENSMFAG00000043428_8:31654618-31654789	ENSMFAG00000043428_8:31727254-31727395	ENSG00000165392_8:31058372-31058543	ENSG00000165392_8:31132365-31132506	NA	Macaca	9541
ENSMFAG00000043428_27-19	9	ENSMFAG00000043428_8:31697848-31697954	ENSMFAG00000043428_8:31736705-31736799	ENSG00000165392_8:31100849-31100955	ENSG00000165392_8:31141681-31141775	NA	Macaca	9541
ENSMFAG00000043428_29-19	11	ENSMFAG00000043428_8:31697848-31697954	ENSMFAG00000043428_8:31738579-31738652	ENSG00000165392_8:31100849-31100955	ENSG00000165392_8:31143550-31143623	NA	Macaca	9541
ENSMFAG00000043523_15-14	2	ENSMFAG00000043523_16:45509886-45509948	ENSMFAG00000043523_16:45510134-45510211	ENSG00000108443_17:59936215-59936541	ENSG00000108443_17:59936215-59936541	NA	Macaca	9541
ENSMFAG00000043540_7-5	3	ENSMFAG00000043540_7:126075945-126076103	ENSMFAG00000043540_7:126078632-126078694	ENSG00000023608_14:61776095-61776253	ENSG00000023608_14:61778848-61778910	NA	Macaca	9541
ENSMFAG00000043578_14-14	1	ENSMFAG00000043578_6:176059668-176059822	ENSMFAG00000043578_6:176059668-176059822	ENSG00000170085_5:176313691-176313845	ENSG00000170085_5:176313691-176313845	NA	Macaca	9541
ENSMFAG00000043606_11-10	2	ENSMFAG00000043606_17:20577518-20577637	ENSMFAG00000043606_17:20580453-20580548	ENSG00000172766_13:41328724-41328843	ENSG00000172766_13:41331274-41331369	NA	Macaca	9541
ENSMFAG00000043652_12-11	2	ENSMFAG00000043652_5:87172553-87172674	ENSMFAG00000043652_5:87172940-87173057	ENSG00000118762_4:88065374-88065879	ENSG00000118762_4:88065374-88065879	NA	Macaca	9541
ENSMFAG00000043784_17-8	10	ENSMFAG00000043784_1:44861179-44861315	ENSMFAG00000043784_1:44907220-44907377	ENSG00000116711_1:186932763-186932899	ENSG00000116711_1:186979315-186979472	NA	Macaca	9541
ENSMFAG00000043795_12-12	2	ENSMFAG00000043795_20:56407003-56408010	ENSMFAG00000043795_20:56406951-56408010	ENSG00000072736_16:68190768-68191775	ENSG00000072736_16:68190768-68191775	NA	Macaca	9541
ENSMFAG00000043795_2-2	1	ENSMFAG00000043795_20:56336526-56337660	ENSMFAG00000043795_20:56336526-56337660	ENSG00000072736_16:68121987-68123121	ENSG00000072736_16:68121987-68123121	NA	Macaca	9541
ENSMFAG00000043795_3-3	1	ENSMFAG00000043795_20:56341003-56341165	ENSMFAG00000043795_20:56341003-56341165	ENSG00000072736_16:68126448-68126610	ENSG00000072736_16:68126448-68126610	NA	Macaca	9541
ENSMFAG00000043904_16-15	2	ENSMFAG00000043904_12:94743285-94743384	ENSMFAG00000043904_12:94750722-94750837	ENSG00000116117_2:205185764-205185863	ENSG00000116117_2:205193205-205193320	NA	Macaca	9541
ENSMFAG00000043904_23-15	8	ENSMFAG00000043904_12:94743285-94743384	ENSMFAG00000043904_12:94999888-95000190	ENSG00000116117_2:205185764-205185863	ENSG00000116117_2:205440370-205440672	NA	Macaca	9541
ENSMFAG00000043943_8-6	3	ENSMFAG00000043943_16:75430805-75431020	ENSMFAG00000043943_16:75437890-75437970	ENSG00000078687_17:78064722-78064937	ENSG00000078687_17:78071085-78071165	NA	Macaca	9541
ENSMFAG00000043945_12-8	5	ENSMFAG00000043945_8:48518600-48518687	ENSMFAG00000043945_8:48540971-48541123	ENSG00000164808_8:47700403-47700490	ENSG00000164808_8:47713489-47713641	NA	Macaca	9541
ENSMFAG00000043945_12-9	4	ENSMFAG00000043945_8:48519909-48520052	ENSMFAG00000043945_8:48540971-48541123	ENSG00000164808_8:47701721-47701864	ENSG00000164808_8:47713489-47713641	NA	Macaca	9541
ENSMFAG00000043970_13-13	1	ENSMFAG00000043970_6:72046970-72047250	ENSMFAG00000043970_6:72046970-72047250	ENSG00000214944_5:73840480-73840760	ENSG00000214944_5:73840480-73840760	NA	Macaca	9541
ENSMFAG00000044086_9-6	3	ENSMFAG00000044086_3:172136711-172136760	ENSMFAG00000044086_3:172144108-172144279	ENSG00000105948_7:139142256-139142305	ENSG00000105948_7:139148206-139148377	NA	Macaca	9541
ENSMFAG00000044130_6-4	4	ENSMFAG00000044130_2:117368975-117369154	ENSMFAG00000044130_2:117461596-117461691	ENSG00000144724_3:61989625-61989804	ENSG00000144724_3:62078163-62078258	NA	Macaca	9541
ENSMFAG00000044289_23-11	11	ENSMFAG00000044289_11:77258258-77258366	ENSMFAG00000044289_11:77352518-77352595	ENSG00000067798_12:78049993-78050101	ENSG00000067798_12:78148842-78148919	NA	Macaca	9541
ENSMFAG00000044289_23-19	5	ENSMFAG00000044289_11:77332519-77332679	ENSMFAG00000044289_11:77352518-77352595	ENSG00000067798_12:78128706-78128866	ENSG00000067798_12:78148842-78148919	NA	Macaca	9541
ENSMFAG00000044289_25-19	7	ENSMFAG00000044289_11:77332519-77332679	ENSMFAG00000044289_11:77372568-77372679	ENSG00000067798_12:78128706-78128866	ENSG00000067798_12:78168755-78168866	NA	Macaca	9541
ENSMFAG00000044289_7-5	3	ENSMFAG00000044289_11:77166404-77166476	ENSMFAG00000044289_11:77200813-77200881	ENSG00000067798_12:77966229-77966301	ENSG00000067798_12:77994803-77994871	NA	Macaca	9541
ENSMFAG00000044298_9-3	5	ENSMFAG00000044298_2:143852978-143853121	ENSMFAG00000044298_2:143863053-143863195	ENSG00000144712_3:12803488-12803631	ENSG00000144712_3:12813246-12813388	NA	Macaca	9541
ENSMFAG00000044357_27-9	18	ENSMFAG00000044357_2:89553496-89553528	ENSMFAG00000044357_2:89599405-89599451	ENSG00000156931_3:184838714-184840537	ENSG00000156931_3:184885969-184886156	NA	Macaca	9541
ENSMFAG00000044392_5-5	1	ENSMFAG00000044392_9:67305576-67307871	ENSMFAG00000044392_9:67305576-67307871	ENSG00000138336_10:68644698-68647005	ENSG00000138336_10:68644698-68647005	NA	Macaca	9541
ENSMFAG00000044585_3-3	1	ENSMFAG00000044585_2:177934549-177934798	ENSMFAG00000044585_2:177934549-177934798	ENSG00000169379_3:94003659-94003908	ENSG00000169379_3:94003659-94003908	NA	Macaca	9541
ENSMFAG00000044651_14-3	10	ENSMFAG00000044651_16:55169545-55169630	ENSMFAG00000044651_16:55187045-55187192	ENSG00000067596_17:43489449-43489534	ENSG00000067596_17:43499956-43500103	NA	Macaca	9541
ENSMFAG00000044739_9-5	4	ENSMFAG00000044739_16:80265816-80265962	ENSMFAG00000044739_16:80279975-80280184	ENSG00000141568_17:82571724-82571870	ENSG00000141568_17:82587063-82587272	NA	Macaca	9541
ENSMFAG00000044807_5-5	1	ENSMFAG00000044807_X:145573578-145574438	ENSMFAG00000044807_X:145573578-145574438	ENSG00000155966_X:148661908-148662768	ENSG00000155966_X:148661908-148662768	NA	Macaca	9541
ENSMFAG00000044852_9-7	1	ENSMFAG00000044852_20:15044003-15044084	ENSMFAG00000044852_20:15044003-15044084	ENSG00000140694_16:14627106-14627187	ENSG00000140694_16:14627106-14627187	NA	Macaca	9541
ENSMFAG00000044911_10-10	1	ENSMFAG00000044911_20:57575097-57575293	ENSMFAG00000044911_20:57575097-57575293	ENSG00000168807_16:69284048-69284244	ENSG00000168807_16:69284048-69284244	NA	Macaca	9541
ENSMFAG00000044979_15-4	11	ENSMFAG00000044979_9:90432527-90432641	ENSMFAG00000044979_9:90460589-90460709	ENSG00000095564_10:91939952-91940066	ENSG00000095564_10:91966637-91966757	NA	Macaca	9541
ENSMFAG00000044979_33-24	10	ENSMFAG00000044979_9:90487718-90487827	ENSMFAG00000044979_9:90505878-90506008	ENSG00000095564_10:91994535-91994644	ENSG00000095564_10:92013899-92014029	NA	Macaca	9541
ENSMFAG00000045004_17-14	3	ENSMFAG00000045004_13:1176516-1176638	ENSMFAG00000045004_13:1180667-1180783	ENSG00000121152_2:96360588-96360710	ENSG00000121152_2:96367257-96367373	NA	Macaca	9541
ENSMFAG00000045017_13-10	4	ENSMFAG00000045017_5:157879724-157879795	ENSMFAG00000045017_5:157889309-157889383	ENSG00000171509_4:158607972-158608043	ENSG00000171509_4:158617131-158617205	NA	Macaca	9541
ENSMFAG00000045137_7-5	3	ENSMFAG00000045137_9:18251485-18251631	ENSMFAG00000045137_9:18258598-18258790	ENSG00000136738_10:17688027-17688157	ENSG00000136738_10:17694926-17695241	NA	Macaca	9541
ENSMFAG00000045259_18-13	6	ENSMFAG00000045259_5:2696009-2696162	ENSMFAG00000045259_5:2723499-2723771	ENSG00000125386_4:2662838-2662991	ENSG00000125386_4:2690698-2690970	NA	Macaca	9541
ENSMFAG00000045260_13-7	7	ENSMFAG00000045260_9:20751426-20751525	ENSMFAG00000045260_9:20828584-20828744	ENSG00000120594_10:20164468-20164567	ENSG00000120594_10:20245345-20245505	NA	Macaca	9541
ENSMFAG00000045323_23-18	3	ENSMFAG00000045323_2:88451205-88451463	ENSMFAG00000045323_2:88456308-88456466	ENSG00000163872_3:183772305-183772563	ENSG00000163872_3:183777542-183777700	NA	Macaca	9541
ENSMFAG00000045323_24-14	8	ENSMFAG00000045323_2:88435129-88435290	ENSMFAG00000045323_2:88461589-88461765	ENSG00000163872_3:183756528-183756689	ENSG00000163872_3:183786125-183786301	NA	Macaca	9541
ENSMFAG00000045350_7-3	5	ENSMFAG00000045350_19:34763054-34763263	ENSMFAG00000045350_19:34772863-34773021	ENSG00000166398_19:34319907-34320016	ENSG00000166398_19:34330189-34330347	NA	Macaca	9541
ENSMFAG00000045398_60-31	28	ENSMFAG00000045398_11:126796113-126796393	ENSMFAG00000045398_11:126838714-126838804	ENSG00000184445_12:122582705-122582985	ENSG00000184445_12:122624598-122624688	NA	Macaca	9541
ENSMFAG00000045514_9-6	4	ENSMFAG00000045514_17:55110204-55110310	ENSMFAG00000045514_17:55122900-55122965	ENSG00000136122_13:72731281-72731387	ENSG00000136122_13:72743537-72743602	NA	Macaca	9541
ENSMFAG00000045638_15-14	2	ENSMFAG00000045638_20:18396885-18397058	ENSMFAG00000045638_20:18400182-18400339	ENSG00000170537_16:19037874-19038047	ENSG00000170537_16:19040289-19040446	NA	Macaca	9541
ENSMFAG00000045638_15-8	7	ENSMFAG00000045638_20:18380913-18381055	ENSMFAG00000045638_20:18400182-18400339	ENSG00000170537_16:19021629-19021796	ENSG00000170537_16:19040289-19040446	NA	Macaca	9541
ENSMFAG00000045726_3-3	1	ENSMFAG00000045726_8:106613327-106613428	ENSMFAG00000045726_8:106613327-106613428	ENSG00000169946_8:105444280-105444381	ENSG00000169946_8:105444280-105444381	NA	Macaca	9541
ENSMFAG00000045817_13-10	3	ENSMFAG00000045817_X:43375606-43375653	ENSMFAG00000045817_X:43378343-43378377	ENSG00000147050_X:45034931-45034985	ENSG00000147050_X:45037655-45037689	NA	Macaca	9541
ENSMFAG00000045817_27-25	3	ENSMFAG00000045817_X:43417263-43417392	ENSMFAG00000045817_X:43419677-43419882	ENSG00000147050_X:45076697-45076826	ENSG00000147050_X:45079146-45079351	NA	Macaca	9541
ENSMFAG00000045817_9-5	5	ENSMFAG00000045817_X:43269646-43269754	ENSMFAG00000045817_X:43361683-43361803	ENSG00000147050_X:44961284-44961392	ENSG00000147050_X:45020610-45020730	NA	Macaca	9541
ENSMFAG00000045986_18-10	9	ENSMFAG00000045986_19:11094942-11095009	ENSMFAG00000045986_19:11110943-11111087	ENSG00000079805_19:10795372-10795439	ENSG00000079805_19:10808519-10812377	NA	Macaca	9541
ENSMFAG00000046135_15-12	3	ENSMFAG00000046135_19:17489484-17489625	ENSMFAG00000046135_19:17498712-17498825	ENSG00000099331_19:17172336-17172477	ENSG00000099331_19:17180645-17181040	NA	Macaca	9541
ENSMFAG00000046172_18-14	5	ENSMFAG00000046172_8:68358349-68358442	ENSMFAG00000046172_8:68365386-68365464	ENSG00000104218_8:67111972-67112075	ENSG00000104218_8:67118743-67118821	NA	Macaca	9541
ENSMFAG00000046172_19-14	6	ENSMFAG00000046172_8:68358349-68358442	ENSMFAG00000046172_8:68378515-68378644	ENSG00000104218_8:67111972-67112075	ENSG00000104218_8:67131951-67132080	NA	Macaca	9541
ENSMFAG00000046172_20-13	8	ENSMFAG00000046172_8:68352298-68352368	ENSMFAG00000046172_8:68383998-68384145	ENSG00000104218_8:67105905-67105975	ENSG00000104218_8:67137456-67137603	NA	Macaca	9541
ENSMFAG00000046172_28-10	18	ENSMFAG00000046172_8:68339327-68339425	ENSMFAG00000046172_8:68416607-68416746	ENSG00000104218_8:67093543-67093641	ENSG00000104218_8:67172416-67172555	NA	Macaca	9541
ENSMFAG00000046172_28-13	15	ENSMFAG00000046172_8:68352298-68352368	ENSMFAG00000046172_8:68416607-68416746	ENSG00000104218_8:67105905-67105975	ENSG00000104218_8:67172416-67172555	NA	Macaca	9541
ENSMFAG00000046172_28-21	7	ENSMFAG00000046172_8:68395341-68395493	ENSMFAG00000046172_8:68416607-68416746	ENSG00000104218_8:67149783-67149935	ENSG00000104218_8:67172416-67172555	NA	Macaca	9541
ENSMFAG00000046172_28-9	19	ENSMFAG00000046172_8:68337574-68337654	ENSMFAG00000046172_8:68416607-68416746	ENSG00000104218_8:67091803-67091869	ENSG00000104218_8:67172416-67172555	NA	Macaca	9541
ENSMFAG00000046172_30-17	13	ENSMFAG00000046172_8:68364897-68365018	ENSMFAG00000046172_8:68422328-68422374	ENSG00000104218_8:67118248-67118369	ENSG00000104218_8:67177680-67177726	NA	Macaca	9541
ENSMFAG00000046172_30-23	7	ENSMFAG00000046172_8:68404021-68404170	ENSMFAG00000046172_8:68422328-68422374	ENSG00000104218_8:67158447-67158596	ENSG00000104218_8:67177680-67177726	NA	Macaca	9541
ENSMFAG00000046172_31-5	26	ENSMFAG00000046172_8:68320005-68320113	ENSMFAG00000046172_8:68424513-68424576	ENSG00000104218_8:67074243-67074351	ENSG00000104218_8:67179863-67179926	NA	Macaca	9541
ENSMFAG00000046172_32-13	19	ENSMFAG00000046172_8:68352298-68352368	ENSMFAG00000046172_8:68435245-68435354	ENSG00000104218_8:67105905-67105975	ENSG00000104218_8:67190650-67190759	NA	Macaca	9541
ENSMFAG00000046172_32-21	11	ENSMFAG00000046172_8:68395341-68395493	ENSMFAG00000046172_8:68435245-68435354	ENSG00000104218_8:67149783-67149935	ENSG00000104218_8:67190650-67190759	NA	Macaca	9541
ENSMFAG00000046251_13-3	10	ENSMFAG00000046251_9:1192526-1192696	ENSMFAG00000046251_9:1214148-1214199	ENSG00000107937_10:992489-992659	ENSG00000107937_10:1009529-1009580	NA	Macaca	9541
ENSCJAG00000000034_15-10	6	ENSCJAG00000000034.2_chr16:46560994-46561125	ENSCJAG00000000034.2_chr16:46571981-46572101	ENSG00000156162_8:94765183-94765314	ENSG00000156162_8:94777666-94777786	NA	Marmoset	9483
ENSCJAG00000000034_15-12	4	ENSCJAG00000000034.2_chr16:46562455-46562528	ENSCJAG00000000034.2_chr16:46571981-46572101	ENSG00000156162_8:94766612-94766685	ENSG00000156162_8:94777666-94777786	NA	Marmoset	9483
ENSCJAG00000000393_21-10	8	ENSCJAG00000000393.2_chr16:37140552-37140699	ENSCJAG00000000393.2_chr16:37154579-37154716	ENSG00000133739_8:85124792-85124939	ENSG00000133739_8:85138338-85138475	NA	Marmoset	9483
ENSCJAG00000000419_35-7	23	ENSCJAG00000000419.2_chr6:154868855-154868995	ENSCJAG00000000419.2_chr6:154899782-154899858	ENSG00000204104_2:238328686-238328829	ENSG00000204104_2:238356004-238356080	NA	Marmoset	9483
ENSCJAG00000000466_16-14	3	ENSCJAG00000000466.2_chr5:43762795-43762933	ENSCJAG00000000466.2_chr5:43764581-43764698	ENSG00000197818_20:49862929-49863067	ENSG00000197818_20:49864739-49864844	NA	Marmoset	9483
ENSCJAG00000000466_18-17	2	ENSCJAG00000000466.2_chr5:43773234-43773350	ENSCJAG00000000466.2_chr5:43776065-43776147	ENSG00000197818_20:49874705-49874821	ENSG00000197818_20:49877981-49878063	NA	Marmoset	9483
ENSCJAG00000000491_12-8	5	ENSCJAG00000000491.3_chr6:154213072-154213119	ENSCJAG00000000491.3_chr6:154222777-154222836	ENSG00000124831_2:237717762-237717809	ENSG00000124831_2:237727876-237727935	NA	Marmoset	9483
ENSCJAG00000000495_8-5	4	ENSCJAG00000000495.2_chr16:30800960-30801111	ENSCJAG00000000495.2_chr16:30820059-30820166	ENSG00000104427_8:78689222-78689373	ENSG00000104427_8:78715221-78715328	NA	Marmoset	9483
ENSCJAG00000000643_18-18	1	ENSCJAG00000000643.2_chr9:12829276-12829436	ENSCJAG00000000643.2_chr9:12829276-12829436	ENSG00000082805_12:1289852-1290012	ENSG00000082805_12:1289852-1290012	NA	Marmoset	9483
ENSCJAG00000000730_14-7	8	ENSCJAG00000000730.3_chr4:86711034-86711178	ENSCJAG00000000730.3_chr4:86719067-86719232	ENSG00000135336_6:87603384-87603528	ENSG00000135336_6:87612089-87612248	NA	Marmoset	9483
ENSCJAG00000000987_11-11	2	ENSCJAG00000000987.2_chrX:8499715-8500337	ENSCJAG00000000987.2_chrX:8499623-8499715	ENSG00000101871_X:10566888-10567603	ENSG00000101871_X:10566888-10567603	NA	Marmoset	9483
ENSCJAG00000001137_12-6	6	ENSCJAG00000001137.2_chr14:13242547-13242651	ENSCJAG00000001137.2_chr14:13256240-13256404	ENSG00000135968_2:108468980-108469084	ENSG00000135968_2:108482287-108482451	NA	Marmoset	9483
ENSCJAG00000001186_2-2	1	ENSCJAG00000001186.1_chr12:48874314-48874906	ENSCJAG00000001186.1_chr12:48874314-48874906	ENSG00000156671_10:75150514-75151106	ENSG00000156671_10:75150514-75151106	NA	Marmoset	9483
ENSCJAG00000001217_19-5	12	ENSCJAG00000001217.2_chr10:28040132-28040205	ENSCJAG00000001217.2_chr10:28070324-28070626	ENSG00000081014_15:50923931-50924004	ENSG00000081014_15:50958492-50958794	NA	Marmoset	9483
ENSCJAG00000001233_16-16	1	ENSCJAG00000001233.2_chr5:85957955-85958105	ENSCJAG00000001233.2_chr5:85957955-85958105	ENSG00000141376_17:61015751-61015901	ENSG00000141376_17:61015751-61015901	NA	Marmoset	9483
ENSCJAG00000001239_6-5	2	ENSCJAG00000001239.2_chr4:96147567-96147674	ENSCJAG00000001239.2_chr4:96169663-96169761	ENSG00000186231_6:97041492-97041599	ENSG00000186231_6:97064628-97064726	NA	Marmoset	9483
ENSCJAG00000001378_7-6	2	ENSCJAG00000001378.2_chr10:27541518-27541680	ENSCJAG00000001378.2_chr10:27543261-27543303	ENSG00000138592_15:50459000-50459162	ENSG00000138592_15:50462280-50462322	NA	Marmoset	9483
ENSCJAG00000001378_8-6	3	ENSCJAG00000001378.2_chr10:27541518-27541680	ENSCJAG00000001378.2_chr10:27546236-27546380	ENSG00000138592_15:50459000-50459162	ENSG00000138592_15:50465047-50465191	NA	Marmoset	9483
ENSCJAG00000001518_5-4	3	ENSCJAG00000001518.2_chr20:7349681-7349811	ENSCJAG00000001518.2_chr20:7354754-7354954	ENSG00000103479_16:53439016-53439146	ENSG00000103479_16:53442658-53442858	NA	Marmoset	9483
ENSCJAG00000001573_18-11	8	ENSCJAG00000001573.2_chr20:7205378-7205464	ENSCJAG00000001573.2_chr20:7221863-7222073	ENSG00000177200_16:53231419-53231505	ENSG00000177200_16:53247293-53247503	NA	Marmoset	9483
ENSCJAG00000001643_3-3	1	ENSCJAG00000001643.3_chr1:203468619-203468844	ENSCJAG00000001643.3_chr1:203468619-203468844	ENSG00000186732_22:43474736-43474961	ENSG00000186732_22:43474736-43474961	NA	Marmoset	9483
ENSCJAG00000001840_17-12	6	ENSCJAG00000001840.2_chr15:20484623-20484746	ENSCJAG00000001840.2_chr15:20490041-20490182	ENSG00000163808_3:44800314-44800437	ENSG00000163808_3:44805845-44805986	NA	Marmoset	9483
ENSCJAG00000001840_19-12	8	ENSCJAG00000001840.2_chr15:20484623-20484746	ENSCJAG00000001840.2_chr15:20494819-20494926	ENSG00000163808_3:44800314-44800437	ENSG00000163808_3:44812182-44812289	NA	Marmoset	9483
ENSCJAG00000001868_16-11	6	ENSCJAG00000001868.2_chr13:91200821-91200969	ENSCJAG00000001868.2_chr13:91329480-91329674	ENSG00000187323_18:53205216-53205364	ENSG00000187323_18:53339713-53339907	NA	Marmoset	9483
ENSCJAG00000001868_23-18	6	ENSCJAG00000001868.2_chr13:91389049-91389281	ENSCJAG00000001868.2_chr13:91413483-91413515	ENSG00000187323_18:53391655-53391887	ENSG00000187323_18:53416124-53416156	NA	Marmoset	9483
ENSCJAG00000001868_28-26	3	ENSCJAG00000001868.2_chr13:91454669-91454831	ENSCJAG00000001868.2_chr13:91468765-91468881	ENSG00000187323_18:53450500-53450662	ENSG00000187323_18:53467894-53468010	NA	Marmoset	9483
ENSCJAG00000001995_21-7	12	ENSCJAG00000001995.2_chr9:91108869-91108973	ENSCJAG00000001995.2_chr9:91233712-91233772	ENSG00000151572_12:100922226-100922330	ENSG00000151572_12:101048341-101048401	NA	Marmoset	9483
ENSCJAG00000002156_14-3	12	ENSCJAG00000002156.2_chr10:10025450-10025498	ENSCJAG00000002156.2_chr10:10138170-10138218	ENSG00000137764_15:67550034-67550075	ENSG00000137764_15:67664597-67664645	NA	Marmoset	9483
ENSCJAG00000002156_14-5	10	ENSCJAG00000002156.2_chr10:10056151-10056220	ENSCJAG00000002156.2_chr10:10138170-10138218	ENSG00000137764_15:67580754-67580823	ENSG00000137764_15:67664597-67664645	NA	Marmoset	9483
ENSCJAG00000002156_17-5	13	ENSCJAG00000002156.2_chr10:10056151-10056220	ENSCJAG00000002156.2_chr10:10184949-10185020	ENSG00000137764_15:67580754-67580823	ENSG00000137764_15:67703337-67703408	NA	Marmoset	9483
ENSCJAG00000002156_17-9	9	ENSCJAG00000002156.2_chr10:10075535-10075599	ENSCJAG00000002156.2_chr10:10184949-10185020	ENSG00000137764_15:67600685-67600749	ENSG00000137764_15:67703337-67703408	NA	Marmoset	9483
ENSCJAG00000002156_22-10	13	ENSCJAG00000002156.2_chr10:10104395-10104434	ENSCJAG00000002156.2_chr10:10258725-10258770	ENSG00000137764_15:67630888-67630927	ENSG00000137764_15:67772707-67772752	NA	Marmoset	9483
ENSCJAG00000002224_13-5	6	ENSCJAG00000002224.2_chr10:10655535-10655625	ENSCJAG00000002224.2_chr10:10690557-10690737	ENSG00000033800_15:68145816-68145906	ENSG00000033800_15:68176474-68176654	NA	Marmoset	9483
ENSCJAG00000002283_20-15	6	ENSCJAG00000002283.2_chr10:32602038-32602178	ENSCJAG00000002283.2_chr10:32615590-32615654	ENSG00000069943_15:55333867-55334007	ENSG00000069943_15:55341738-55341802	NA	Marmoset	9483
ENSCJAG00000002343_2-2	1	ENSCJAG00000002343.2_chr3:42580931-42581265	ENSCJAG00000002343.2_chr3:42580931-42581265	ENSG00000170390_4:150102478-150102812	ENSG00000170390_4:150102478-150102812	NA	Marmoset	9483
ENSCJAG00000002409_26-9	14	ENSCJAG00000002409.3_chr7:36564829-36564914	ENSCJAG00000002409.3_chr7:36602413-36602502	ENSG00000067606_1:2135262-2135347	ENSG00000067606_1:2175224-2175313	NA	Marmoset	9483
ENSCJAG00000002517_25-24	2	ENSCJAG00000002517.2_chr17:8801299-8801452	ENSCJAG00000002517.2_chr17:8806538-8806788	ENSG00000173889_3:170122591-170122744	ENSG00000173889_3:170117123-170117476	NA	Marmoset	9483
ENSCJAG00000002539_11-2	10	ENSCJAG00000002539.1_chr7:144577277-144577326	ENSCJAG00000002539.1_chr7:144617307-144617364	ENSG00000116266_1:108752257-108752306	ENSG00000116266_1:108782649-108782706	NA	Marmoset	9483
ENSCJAG00000002616_5-5	1	ENSCJAG00000002616.2_chr7:144725433-144725731	ENSCJAG00000002616.2_chr7:144725433-144725731	ENSG00000121957_1:108885275-108885578	ENSG00000121957_1:108885275-108885578	NA	Marmoset	9483
ENSCJAG00000002646_3-3	1	ENSCJAG00000002646.2_chr17:40500256-40502694	ENSCJAG00000002646.2_chr17:40500256-40502694	ENSG00000073711_3:136001059-136003493	ENSG00000073711_3:136001059-136003493	NA	Marmoset	9483
ENSCJAG00000002725_16-11	5	ENSCJAG00000002725.2_chr21:40241617-40241726	ENSCJAG00000002725.2_chr21:40248441-40248561	ENSG00000142197_21:36214081-36214190	ENSG00000142197_21:36219372-36219492	NA	Marmoset	9483
ENSCJAG00000002725_63-46	13	ENSCJAG00000002725.2_chr21:40296532-40296611	ENSCJAG00000002725.2_chr21:40307981-40308110	ENSG00000142197_21:36277021-36277100	ENSG00000142197_21:36292104-36292233	NA	Marmoset	9483
ENSCJAG00000002852_9-2	7	ENSCJAG00000002852.2_chr10:20516185-20516313	ENSCJAG00000002852.2_chr10:20526321-20526445	ENSG00000137822_15:43376098-43376226	ENSG00000137822_15:43386206-43386330	NA	Marmoset	9483
ENSCJAG00000002852_9-8	2	ENSCJAG00000002852.2_chr10:20525906-20526071	ENSCJAG00000002852.2_chr10:20526321-20526445	ENSG00000137822_15:43385791-43385916	ENSG00000137822_15:43386206-43386330	NA	Marmoset	9483
ENSCJAG00000002890_9-8	2	ENSCJAG00000002890.2_chr9:84185809-84185923	ENSCJAG00000002890.2_chr9:84195649-84195796	ENSG00000136040_12:94209590-94209704	ENSG00000136040_12:94220016-94220163	NA	Marmoset	9483
ENSCJAG00000003157_5-4	2	ENSCJAG00000003157.2_chr4:131513917-131514056	ENSCJAG00000003157.2_chr4:131523352-131523488	ENSG00000118507_6:131160059-131160198	ENSG00000118507_6:131165081-131165217	NA	Marmoset	9483
ENSCJAG00000003235_25-2	18	ENSCJAG00000003235.2_chr4:130309590-130309669	ENSCJAG00000003235.2_chr4:130381096-130381198	ENSG00000198945_6:130022227-130022305	ENSG00000198945_6:130094265-130094367	NA	Marmoset	9483
ENSCJAG00000003235_29-26	4	ENSCJAG00000003235.2_chr4:130390903-130391052	ENSCJAG00000003235.2_chr4:130421927-130421989	ENSG00000198945_6:130104426-130104575	ENSG00000198945_6:130133843-130133905	NA	Marmoset	9483
ENSCJAG00000003250_10-7	4	ENSCJAG00000003250.2_chr13:100825355-100825557	ENSCJAG00000003250.2_chr13:100833322-100833477	ENSG00000081913_18:62902964-62903166	ENSG00000081913_18:62919959-62920114	NA	Marmoset	9483
ENSCJAG00000003278_21-13	9	ENSCJAG00000003278.2_chr3:64509347-64509437	ENSCJAG00000003278.2_chr3:64563770-64563966	ENSG00000151466_4:128970378-128972372	ENSG00000151466_4:128936655-128936851	NA	Marmoset	9483
ENSCJAG00000003430_12-5	8	ENSCJAG00000003430.2_chr7:136707999-136708091	ENSCJAG00000003430.2_chr7:136806147-136806306	ENSG00000079335_1:100390732-100390824	ENSG00000079335_1:100484292-100484451	NA	Marmoset	9483
ENSCJAG00000003487_20-9	4	ENSCJAG00000003487.2_chr13:41093826-41093989	ENSCJAG00000003487.2_chr13:41128127-41128220	ENSG00000168172_8:42964311-42964474	ENSG00000168172_8:42997550-42997637	NA	Marmoset	9483
ENSCJAG00000003653_8-4	5	ENSCJAG00000003653.2_chr4:159488515-159488695	ENSCJAG00000003653.2_chr4:159522179-159522413	ENSG00000130338_6:158448996-158449176	ENSG00000130338_6:158481055-158481289	NA	Marmoset	9483
ENSCJAG00000003653_9-4	6	ENSCJAG00000003653.2_chr4:159488515-159488695	ENSCJAG00000003653.2_chr4:159530185-159530329	ENSG00000130338_6:158448996-158449176	ENSG00000130338_6:158489588-158489732	NA	Marmoset	9483
ENSCJAG00000003701_21-12	10	ENSCJAG00000003701.2_chr4:68769840-68769917	ENSCJAG00000003701.2_chr4:68813469-68813566	ENSG00000082269_6:70486167-70486244	ENSG00000082269_6:70533757-70533854	NA	Marmoset	9483
ENSCJAG00000003701_23-6	17	ENSCJAG00000003701.2_chr4:68757816-68757955	ENSCJAG00000003701.2_chr4:68817872-68817982	ENSG00000082269_6:70475410-70475549	ENSG00000082269_6:70538291-70538401	NA	Marmoset	9483
ENSCJAG00000004040_8-7	2	ENSCJAG00000004040.2_chrX:137551923-137552033	ENSCJAG00000004040.2_chrX:137556525-137556626	ENSG00000171100_X:150614589-150614699	ENSG00000171100_X:150619038-150619139	NA	Marmoset	9483
ENSCJAG00000004052_30-21	6	ENSCJAG00000004052.2_chrX:69207676-69207870	ENSCJAG00000004052.2_chrX:69233302-69233404	ENSG00000165240_X:78029250-78029444	ENSG00000165240_X:78045470-78045572	NA	Marmoset	9483
ENSCJAG00000004312_14-7	7	ENSCJAG00000004312.2_chr17:60425678-60425835	ENSCJAG00000004312.2_chr17:60632632-60632742	ENSG00000144642_3:29739720-29739877	ENSG00000144642_3:29936086-29936196	NA	Marmoset	9483
ENSCJAG00000004394_6-3	4	ENSCJAG00000004394.1_chr4:116542909-116543010	ENSCJAG00000004394.1_chr4:116551425-116551556	ENSG00000196911_6:116692055-116692156	ENSG00000196911_6:116702019-116702150	NA	Marmoset	9483
ENSCJAG00000004394_8-3	6	ENSCJAG00000004394.1_chr4:116542909-116543010	ENSCJAG00000004394.1_chr4:116567150-116567249	ENSG00000196911_6:116692055-116692156	ENSG00000196911_6:116716219-116716318	NA	Marmoset	9483
ENSCJAG00000004506_12-10	3	ENSCJAG00000004506.3_chr10:5886125-5886207	ENSCJAG00000004506.3_chr10:5891035-5891148	ENSG00000140455_15:63558106-63558188	ENSG00000140455_15:63562895-63563008	NA	Marmoset	9483
ENSCJAG00000004607_18-17	2	ENSCJAG00000004607.2_chrX:15333229-15333312	ENSCJAG00000004607.2_chrX:15334354-15334499	ENSG00000169891_X:17133824-17133907	ENSG00000169891_X:17135261-17135406	NA	Marmoset	9483
ENSCJAG00000004607_19-14	6	ENSCJAG00000004607.2_chrX:15245910-15245955	ENSCJAG00000004607.2_chrX:15344312-15344417	ENSG00000169891_X:17074114-17074159	ENSG00000169891_X:17138856-17138961	NA	Marmoset	9483
ENSCJAG00000004674_18-2	15	ENSCJAG00000004674.2_chr16:19411618-19411726	ENSCJAG00000004674.2_chr16:19470401-19470609	ENSG00000104218_8:67074243-67074351	ENSG00000104218_8:67115914-67116122	NA	Marmoset	9483
ENSCJAG00000004674_18-4	13	ENSCJAG00000004674.2_chr16:19426849-19426952	ENSCJAG00000004674.2_chr16:19470401-19470609	ENSG00000104218_8:67086007-67086110	ENSG00000104218_8:67115914-67116122	NA	Marmoset	9483
ENSCJAG00000004674_18-8	10	ENSCJAG00000004674.2_chr16:19432369-19432449	ENSCJAG00000004674.2_chr16:19470401-19470609	ENSG00000104218_8:67091803-67091869	ENSG00000104218_8:67115914-67116122	NA	Marmoset	9483
ENSCJAG00000004674_22-4	17	ENSCJAG00000004674.2_chr16:19426849-19426952	ENSCJAG00000004674.2_chr16:19489963-19490110	ENSG00000104218_8:67086007-67086110	ENSG00000104218_8:67137456-67137603	NA	Marmoset	9483
ENSCJAG00000004674_22-9	13	ENSCJAG00000004674.2_chr16:19445309-19445407	ENSCJAG00000004674.2_chr16:19489963-19490110	ENSG00000104218_8:67093543-67093641	ENSG00000104218_8:67137456-67137603	NA	Marmoset	9483
ENSCJAG00000004674_23-15	9	ENSCJAG00000004674.2_chr16:19458372-19458442	ENSCJAG00000004674.2_chr16:19508033-19508185	ENSG00000104218_8:67105905-67105975	ENSG00000104218_8:67149783-67149935	NA	Marmoset	9483
ENSCJAG00000004686_9-7	1	ENSCJAG00000004686.2_chr22:12135443-12135571	ENSCJAG00000004686.2_chr22:12135443-12135571	ENSG00000179115_19:12928398-12928663	ENSG00000179115_19:12928398-12928663	NA	Marmoset	9483
ENSCJAG00000004718_10-9	2	ENSCJAG00000004718.2_chr1:201621720-201621805	ENSCJAG00000004718.2_chr1:201630973-201631153	ENSG00000196236_22:40914239-40914324	ENSG00000196236_22:40922333-40922513	NA	Marmoset	9483
ENSCJAG00000004718_5-5	1	ENSCJAG00000004718.2_chr1:201592388-201592795	ENSCJAG00000004718.2_chr1:201592388-201592795	ENSG00000196236_22:40881770-40882177	ENSG00000196236_22:40881770-40882177	NA	Marmoset	9483
ENSCJAG00000004743_35-31	5	ENSCJAG00000004743.2_chrX:23444344-23444475	ENSCJAG00000004743.2_chrX:23512318-23512434	ENSG00000101868_X:24821452-24821583	ENSG00000101868_X:24888006-24888122	NA	Marmoset	9483
ENSCJAG00000004770_21-17	5	ENSCJAG00000004770.2_chr1:201838968-201839147	ENSCJAG00000004770.2_chr1:201843280-201843519	ENSG00000100393_22:41151833-41152012	ENSG00000100393_22:41157169-41157408	NA	Marmoset	9483
ENSCJAG00000004815_26-4	20	ENSCJAG00000004815.2_chr5:133899430-133899525	ENSCJAG00000004815.2_chr5:133964920-133965035	ENSG00000032742_13:20574380-20574475	ENSG00000032742_13:20644843-20644958	NA	Marmoset	9483
ENSCJAG00000004815_29-24	6	ENSCJAG00000004815.2_chr5:133961510-133961618	ENSCJAG00000004815.2_chr5:133989079-133989185	ENSG00000032742_13:20641290-20642896	ENSG00000032742_13:20663265-20663604	NA	Marmoset	9483
ENSCJAG00000004877_44-37	8	ENSCJAG00000004877.2_chr16:20448792-20448971	ENSCJAG00000004877.2_chr16:20460390-20460431	ENSG00000046889_8:68115753-68115932	ENSG00000046889_8:68127378-68127419	NA	Marmoset	9483
ENSCJAG00000004877_46-37	10	ENSCJAG00000004877.2_chr16:20448792-20448971	ENSCJAG00000004877.2_chr16:20473296-20473398	ENSG00000046889_8:68115753-68115932	ENSG00000046889_8:68138415-68138517	NA	Marmoset	9483
ENSCJAG00000004877_48-25	19	ENSCJAG00000004877.2_chr16:20417439-20417524	ENSCJAG00000004877.2_chr16:20492372-20492486	ENSG00000046889_8:68087724-68087809	ENSG00000046889_8:68157322-68157436	NA	Marmoset	9483
ENSCJAG00000004877_52-45	8	ENSCJAG00000004877.2_chr16:20469246-20469463	ENSCJAG00000004877.2_chr16:20564190-20564257	ENSG00000046889_8:68134059-68134276	ENSG00000046889_8:68224559-68224626	NA	Marmoset	9483
ENSCJAG00000004881_22-21	3	ENSCJAG00000004881.2_chr3:20145575-20145738	ENSCJAG00000004881.2_chr3:20145819-20145950	ENSG00000137601_4:169555932-169556095	ENSG00000137601_4:169554043-169555851	NA	Marmoset	9483
ENSCJAG00000005140_4-4	1	ENSCJAG00000005140.2_chrX:107462915-107463087	ENSCJAG00000005140.2_chrX:107462915-107463087	ENSG00000077713_X:119410190-119410362	ENSG00000077713_X:119410190-119410362	NA	Marmoset	9483
ENSCJAG00000005176_11-4	8	ENSCJAG00000005176.2_chr15:4494045-4494152	ENSCJAG00000005176.2_chr15:4515954-4516151	ENSG00000058063_3:182836035-182836142	ENSG00000058063_3:182859162-182859359	NA	Marmoset	9483
ENSCJAG00000005176_24-7	16	ENSCJAG00000005176.2_chr15:4499672-4499719	ENSCJAG00000005176.2_chr15:4543843-4543981	ENSG00000058063_3:182842075-182842122	ENSG00000058063_3:182889410-182889548	NA	Marmoset	9483
ENSCJAG00000005184_32-21	11	ENSCJAG00000005184.2_chr7:44861448-44861527	ENSCJAG00000005184.2_chr7:44897549-44897686	ENSG00000054523_1:10291082-10291161	ENSG00000054523_1:10324758-10324895	NA	Marmoset	9483
ENSCJAG00000005184_43-29	14	ENSCJAG00000005184.2_chr7:44891854-44891947	ENSCJAG00000005184.2_chr7:44922068-44922152	ENSG00000054523_1:10320043-10320136	ENSG00000054523_1:10348649-10348733	NA	Marmoset	9483
ENSCJAG00000005184_43-39	4	ENSCJAG00000005184.2_chr7:44914958-44915076	ENSCJAG00000005184.2_chr7:44922068-44922152	ENSG00000054523_1:10342050-10342168	ENSG00000054523_1:10348649-10348733	NA	Marmoset	9483
ENSCJAG00000005184_55-29	25	ENSCJAG00000005184.2_chr7:44891854-44891947	ENSCJAG00000005184.2_chr7:44956372-44956490	ENSG00000054523_1:10320043-10320136	ENSG00000054523_1:10375255-10375373	NA	Marmoset	9483
ENSCJAG00000005184_55-34	20	ENSCJAG00000005184.2_chr7:44907376-44907494	ENSCJAG00000005184.2_chr7:44956372-44956490	ENSG00000054523_1:10334520-10334638	ENSG00000054523_1:10375255-10375373	NA	Marmoset	9483
ENSCJAG00000005196_14-5	7	ENSCJAG00000005196.2_chr19:22401008-22401169	ENSCJAG00000005196.2_chr19:22423525-22423672	ENSG00000118200_1:200807376-200807537	ENSG00000118200_1:200832706-200832845	NA	Marmoset	9483
ENSCJAG00000005204_17-15	3	ENSCJAG00000005204.2_chr4:110868878-110869331	ENSCJAG00000005204.2_chr4:110925381-110925609	ENSG00000112394_6:111177212-111177665	ENSG00000112394_6:111218814-111219042	NA	Marmoset	9483
ENSCJAG00000005220_11-4	6	ENSCJAG00000005220.2_chrX:19877906-19877965	ENSCJAG00000005220.2_chrX:19942213-19942427	ENSG00000149970_X:21497787-21497846	ENSG00000149970_X:21563238-21563452	NA	Marmoset	9483
ENSCJAG00000005224_12-10	3	ENSCJAG00000005224.2_chr6:118516340-118516567	ENSCJAG00000005224.2_chr6:118532316-118532445	ENSG00000138380_2:202942740-202942881	ENSG00000138380_2:202954005-202954134	NA	Marmoset	9483
ENSCJAG00000005224_21-6	12	ENSCJAG00000005224.2_chr6:118486059-118486221	ENSCJAG00000005224.2_chr6:118558175-118558305	ENSG00000138380_2:202917877-202918043	ENSG00000138380_2:202981555-202981685	NA	Marmoset	9483
ENSCJAG00000005342_7-3	5	ENSCJAG00000005342.3_chr5:25563208-25563400	ENSCJAG00000005342.3_chr5:25578704-25578804	ENSG00000132669_20:19956615-19956807	ENSG00000132669_20:19970838-19970929	NA	Marmoset	9483
ENSCJAG00000005399_30-11	13	ENSCJAG00000005399.2_chr6:119147294-119147470	ENSCJAG00000005399.2_chr6:119181964-119182137	ENSG00000138443_2:203380208-203380384	ENSG00000138443_2:203416908-203417081	NA	Marmoset	9483
ENSCJAG00000005474_11-11	4	ENSCJAG00000005474.3_chr10:57147494-57150910	ENSCJAG00000005474.3_chr10:57147494-57150910	ENSG00000151320_14:32821402-32824815	ENSG00000151320_14:32821402-32824815	NA	Marmoset	9483
ENSCJAG00000005521_21-21	1	ENSCJAG00000005521.2_chr6:121303549-121303851	ENSCJAG00000005521.2_chr6:121303549-121303851	ENSG00000116117_2:205440370-205440672	ENSG00000116117_2:205440370-205440672	NA	Marmoset	9483
ENSCJAG00000005568_13-11	3	ENSCJAG00000005568.2_chr5:26911503-26911596	ENSCJAG00000005568.2_chr5:26920362-26920427	ENSG00000088970_20:21205491-21205584	ENSG00000088970_20:21215583-21215648	NA	Marmoset	9483
ENSCJAG00000005585_54-54	1	ENSCJAG00000005585.2_chr19:23438158-23438355	ENSCJAG00000005585.2_chr19:23438158-23438355	ENSG00000134369_1:201817088-201817285	ENSG00000134369_1:201817088-201817285	NA	Marmoset	9483
ENSCJAG00000005611_38-26	13	ENSCJAG00000005611.2_chr5:27041703-27041834	ENSCJAG00000005611.2_chr5:27077542-27077669	ENSG00000088930_20:21340721-21340852	ENSG00000088930_20:21368463-21368590	NA	Marmoset	9483
ENSCJAG00000005641_38-38	1	ENSCJAG00000005641.2_chr12:11258795-11259002	ENSCJAG00000005641.2_chr12:11258795-11259002	ENSG00000103222_16:16111375-16111582	ENSG00000103222_16:16111375-16111582	NA	Marmoset	9483
ENSCJAG00000005745_13-13	1	ENSCJAG00000005745.2_chr19:23633794-23634029	ENSCJAG00000005745.2_chr19:23633794-23634029	ENSG00000176393_1:201997319-201997554	ENSG00000176393_1:201997319-201997554	NA	Marmoset	9483
ENSCJAG00000005745_16-13	4	ENSCJAG00000005745.2_chr19:23633794-23634029	ENSCJAG00000005745.2_chr19:23638038-23638146	ENSG00000176393_1:201997319-201997554	ENSG00000176393_1:202001469-202001767	NA	Marmoset	9483
ENSCJAG00000005770_10-7	4	ENSCJAG00000005770.2_chr4:44946187-44946290	ENSCJAG00000005770.2_chr4:44949526-44949591	ENSG00000170734_6:43600988-43601091	ENSG00000170734_6:43605254-43605319	NA	Marmoset	9483
ENSCJAG00000005938_26-24	3	ENSCJAG00000005938.2_chr10:54905463-54905559	ENSCJAG00000005938.2_chr10:54913221-54913300	ENSG00000092108_14:30694773-30694869	ENSG00000092108_14:30702296-30702375	NA	Marmoset	9483
ENSCJAG00000005949_33-25	9	ENSCJAG00000005949.3_chr19:24170414-24170620	ENSCJAG00000005949.3_chr19:24252523-24252573	ENSG00000077157_1:202493114-202493317	ENSG00000077157_1:202569147-202569197	NA	Marmoset	9483
ENSCJAG00000005958_15-9	7	ENSCJAG00000005958.2_chr16:46853120-46853242	ENSCJAG00000005958.2_chr16:46873766-46873822	ENSG00000156170_8:95035454-95035576	ENSG00000156170_8:95052174-95052230	NA	Marmoset	9483
ENSCJAG00000005994_15-6	9	ENSCJAG00000005994.2_chr11:94748964-94749092	ENSCJAG00000005994.2_chr11:94815068-94815177	ENSG00000109911_11:31594770-31594901	ENSG00000109911_11:31645906-31650221	NA	Marmoset	9483
ENSCJAG00000006013_11-2	8	ENSCJAG00000006013.2_chr10:74270270-74270340	ENSCJAG00000006013.2_chr10:74287468-74287540	ENSG00000197776_14:49709159-49709229	ENSG00000197776_14:49734589-49734661	NA	Marmoset	9483
ENSCJAG00000006087_35-31	4	ENSCJAG00000006087.2_chr6:158018555-158018644	ENSCJAG00000006087.2_chr6:158028802-158028932	ENSG00000006607_2:241462523-241462612	ENSG00000006607_2:241475857-241475987	NA	Marmoset	9483
ENSCJAG00000006106_15-6	8	ENSCJAG00000006106.2_chr10:54820593-54820717	ENSCJAG00000006106.2_chr10:54839056-54839228	ENSG00000092140_14:30592323-30592447	ENSG00000092140_14:30611302-30612379	NA	Marmoset	9483
ENSCJAG00000006305_16-12	5	ENSCJAG00000006305.2_chr9:51531696-51531782	ENSCJAG00000006305.2_chr9:51563388-51563612	ENSG00000135655_12:62349221-62349307	ENSG00000135655_12:62383840-62384302	NA	Marmoset	9483
ENSCJAG00000006460_16-16	2	ENSCJAG00000006460.3_chr14:38441557-38441682	ENSCJAG00000006460.3_chr14:38441556-38441682	ENSG00000169621_2:68545187-68545312	ENSG00000169621_2:68545187-68545312	NA	Marmoset	9483
ENSCJAG00000006642_4-4	1	ENSCJAG00000006642.2_chr16:89147374-89147475	ENSCJAG00000006642.2_chr16:89147374-89147475	ENSG00000169946_8:105444280-105444381	ENSG00000169946_8:105444280-105444381	NA	Marmoset	9483
ENSCJAG00000006650_12-7	6	ENSCJAG00000006650.2_chr11:83784831-83784990	ENSCJAG00000006650.2_chr11:83837770-83837848	ENSG00000185238_11:20395803-20395962	ENSG00000185238_11:20452130-20452208	NA	Marmoset	9483
ENSCJAG00000006823_5-5	1	ENSCJAG00000006823.2_chr7:112180315-112180724	ENSCJAG00000006823.2_chr7:112180315-112180724	ENSG00000184005_1:76412008-76412417	ENSG00000184005_1:76412008-76412417	NA	Marmoset	9483
ENSCJAG00000006981_18-13	6	ENSCJAG00000006981.2_chr7:113634455-113634555	ENSCJAG00000006981.2_chr7:113655900-113656034	ENSG00000180488_1:77843307-77843407	ENSG00000180488_1:77863894-77864028	NA	Marmoset	9483
ENSCJAG00000007146_4-2	3	ENSCJAG00000007146.2_chr18:5063329-5063496	ENSCJAG00000007146.2_chr18:5072258-5072408	ENSG00000143458_1:151090406-151090573	ENSG00000143458_1:151097852-151098002	NA	Marmoset	9483
ENSCJAG00000007392_23-14	10	ENSCJAG00000007392.2_chr15:29527407-29527494	ENSCJAG00000007392.2_chr15:29542368-29542434	ENSG00000157388_3:53718301-53718388	ENSG00000157388_3:53732016-53732082	NA	Marmoset	9483
ENSCJAG00000007446_17-7	10	ENSCJAG00000007446.2_chr11:19271551-19271652	ENSCJAG00000007446.2_chr11:19301387-19301573	ENSG00000137642_11:121513003-121513104	ENSG00000137642_11:121545243-121545429	NA	Marmoset	9483
ENSCJAG00000007526_11-11	1	ENSCJAG00000007526.2_chr12:50875405-50875592	ENSCJAG00000007526.2_chr12:50875405-50875592	ENSG00000138286_10:73210251-73210438	ENSG00000138286_10:73210251-73210438	NA	Marmoset	9483
ENSCJAG00000007622_11-5	7	ENSCJAG00000007622.2_chr15:30132363-30132479	ENSCJAG00000007622.2_chr15:30383409-30383483	ENSG00000157445_3:54320442-54320558	ENSG00000157445_3:54581803-54581877	NA	Marmoset	9483
ENSCJAG00000007722_22-22	1	ENSCJAG00000007722.2_chr7:22103900-22104083	ENSCJAG00000007722.2_chr7:22103900-22104083	ENSG00000120549_10:24527936-24528119	ENSG00000120549_10:24527936-24528119	NA	Marmoset	9483
ENSCJAG00000007799_7-5	3	ENSCJAG00000007799.1_chr8:11180180-11180392	ENSCJAG00000007799.1_chr8:11203856-11203982	ENSG00000164543_7:43595901-43596113	ENSG00000164543_7:43619597-43619723	NA	Marmoset	9483
ENSCJAG00000008142_2-2	1	ENSCJAG00000008142.2_chr1:135335062-135336066	ENSCJAG00000008142.2_chr1:135335062-135336066	ENSG00000086102_9:33294420-33295427	ENSG00000086102_9:33294420-33295427	NA	Marmoset	9483
ENSCJAG00000008142_29-22	6	ENSCJAG00000008142.2_chr1:135402081-135402311	ENSCJAG00000008142.2_chr1:135417845-135417949	ENSG00000086102_9:33351560-33351790	ENSG00000086102_9:33367515-33367619	NA	Marmoset	9483
ENSCJAG00000008303_7-4	4	ENSCJAG00000008303.1_chr13:83842166-83842300	ENSCJAG00000008303.1_chr13:83847502-83847573	ENSG00000152240_18:46119926-46120060	ENSG00000152240_18:46124822-46124893	NA	Marmoset	9483
ENSCJAG00000008359_12-8	5	ENSCJAG00000008359.2_chr12:78816130-78816198	ENSCJAG00000008359.2_chr12:78821556-78821696	ENSG00000095564_10:91957225-91957293	ENSG00000095564_10:91962538-91962678	NA	Marmoset	9483
ENSCJAG00000008359_37-21	12	ENSCJAG00000008359.2_chr12:78851372-78851562	ENSCJAG00000008359.2_chr12:78865054-78865184	ENSG00000095564_10:91992119-91992309	ENSG00000095564_10:92013899-92014029	NA	Marmoset	9483
ENSCJAG00000008441_5-3	3	ENSCJAG00000008441.2_chr7:228806-228902	ENSCJAG00000008441.2_chr7:231633-231697	ENSG00000047056_10:1077907-1078003	ENSG00000047056_10:1080412-1080476	NA	Marmoset	9483
ENSCJAG00000008441_7-4	4	ENSCJAG00000008441.2_chr7:231180-231275	ENSCJAG00000008441.2_chr7:237232-237303	ENSG00000047056_10:1080011-1080106	ENSG00000047056_10:1086286-1086357	NA	Marmoset	9483
ENSCJAG00000008473_7-7	1	ENSCJAG00000008473.2_chr1:136027810-136028733	ENSCJAG00000008473.2_chr1:136027810-136028733	ENSG00000165006_9:34241185-34242108	ENSG00000165006_9:34241185-34242108	NA	Marmoset	9483
ENSCJAG00000008494_21-15	6	ENSCJAG00000008494.2_chr7:160297-160389	ENSCJAG00000008494.2_chr7:171269-171320	ENSG00000107937_10:999003-999095	ENSG00000107937_10:1009529-1009580	NA	Marmoset	9483
ENSCJAG00000008594_13-2	12	ENSCJAG00000008594.2_chr12:79459048-79459180	ENSCJAG00000008594.2_chr12:79477353-79477560	ENSG00000138160_10:92606265-92606397	ENSG00000138160_10:92632486-92632693	NA	Marmoset	9483
ENSCJAG00000008594_14-2	13	ENSCJAG00000008594.2_chr12:79459048-79459180	ENSCJAG00000008594.2_chr12:79478894-79479066	ENSG00000138160_10:92606265-92606397	ENSG00000138160_10:92633623-92633795	NA	Marmoset	9483
ENSCJAG00000008617_3-3	1	ENSCJAG00000008617.2_chr18:30457934-30459005	ENSCJAG00000008617.2_chr18:30457934-30459005	ENSG00000116183_1:176594524-176595595	ENSG00000116183_1:176594524-176595595	NA	Marmoset	9483
ENSCJAG00000008643_22-18	5	ENSCJAG00000008643.2_chr12:79790166-79790271	ENSCJAG00000008643.2_chr12:79819586-79819765	ENSG00000138190_10:92948274-92948379	ENSG00000138190_10:92974053-92974232	NA	Marmoset	9483
ENSCJAG00000008643_24-18	7	ENSCJAG00000008643.2_chr12:79790166-79790271	ENSCJAG00000008643.2_chr12:79859022-79859095	ENSG00000138190_10:92948274-92948379	ENSG00000138190_10:93014194-93014267	NA	Marmoset	9483
ENSCJAG00000009008_10-9	2	ENSCJAG00000009008.2_chr8:1333876-1334050	ENSCJAG00000009008.2_chr8:1340257-1340341	ENSG00000122507_7:33257236-33257410	ENSG00000122507_7:33264290-33264374	NA	Marmoset	9483
ENSCJAG00000009008_12-4	8	ENSCJAG00000009008.2_chr8:1219527-1219677	ENSCJAG00000009008.2_chr8:1349584-1349713	ENSG00000122507_7:33152701-33152851	ENSG00000122507_7:33273827-33273956	NA	Marmoset	9483
ENSCJAG00000009008_24-17	7	ENSCJAG00000009008.2_chr8:1428203-1428305	ENSCJAG00000009008.2_chr8:1447232-1447327	ENSG00000122507_7:33349068-33349170	ENSG00000122507_7:33367767-33367862	NA	Marmoset	9483
ENSCJAG00000009008_24-18	6	ENSCJAG00000009008.2_chr8:1430329-1430378	ENSCJAG00000009008.2_chr8:1447232-1447327	ENSG00000122507_7:33351219-33351323	ENSG00000122507_7:33367767-33367862	NA	Marmoset	9483
ENSCJAG00000009008_27-10	14	ENSCJAG00000009008.2_chr8:1340257-1340341	ENSCJAG00000009008.2_chr8:1471741-1471893	ENSG00000122507_7:33264290-33264374	ENSG00000122507_7:33387992-33388144	NA	Marmoset	9483
ENSCJAG00000009008_29-17	10	ENSCJAG00000009008.2_chr8:1428203-1428305	ENSCJAG00000009008.2_chr8:1579910-1580092	ENSG00000122507_7:33349068-33349170	ENSG00000122507_7:33505463-33505645	NA	Marmoset	9483
ENSCJAG00000009327_20-11	8	ENSCJAG00000009327.2_chr7:61880351-61880405	ENSCJAG00000009327.2_chr7:61898879-61898889	ENSG00000009780_1:27732603-27732657	ENSG00000009780_1:27749068-27749154	NA	Marmoset	9483
ENSCJAG00000009486_7-4	4	ENSCJAG00000009486.3_chr22:16096794-16096893	ENSCJAG00000009486.3_chr22:16101066-16101155	ENSG00000099331_19:17153967-17154066	ENSG00000099331_19:17159395-17159484	NA	Marmoset	9483
ENSCJAG00000009518_14-12	3	ENSCJAG00000009518.2_chr9:100341835-100341984	ENSCJAG00000009518.2_chr9:100350954-100351043	ENSG00000122970_12:110180422-110180571	ENSG00000122970_12:110192617-110192706	NA	Marmoset	9483
ENSCJAG00000009549_79-76	4	ENSCJAG00000009549.2_chr11:943368-943487	ENSCJAG00000009549.2_chr11:951582-951671	ENSG00000187240_11:103255415-103255534	ENSG00000187240_11:103259888-103259977	NA	Marmoset	9483
ENSCJAG00000009549_88-76	13	ENSCJAG00000009549.2_chr11:943368-943487	ENSCJAG00000009549.2_chr11:995969-996124	ENSG00000187240_11:103255415-103255534	ENSG00000187240_11:103311878-103312033	NA	Marmoset	9483
ENSCJAG00000009549_89-76	14	ENSCJAG00000009549.2_chr11:943368-943487	ENSCJAG00000009549.2_chr11:1000425-1000500	ENSG00000187240_11:103255415-103255534	ENSG00000187240_11:103316545-103316620	NA	Marmoset	9483
ENSCJAG00000009549_91-76	16	ENSCJAG00000009549.2_chr11:943368-943487	ENSCJAG00000009549.2_chr11:1007179-1007283	ENSG00000187240_11:103255415-103255534	ENSG00000187240_11:103323886-103323990	NA	Marmoset	9483
ENSCJAG00000009549_92-76	17	ENSCJAG00000009549.2_chr11:943368-943487	ENSCJAG00000009549.2_chr11:1045652-1045768	ENSG00000187240_11:103255415-103255534	ENSG00000187240_11:103358243-103358359	NA	Marmoset	9483
ENSCJAG00000009549_93-76	18	ENSCJAG00000009549.2_chr11:943368-943487	ENSCJAG00000009549.2_chr11:1081406-1081615	ENSG00000187240_11:103255415-103255534	ENSG00000187240_11:103399663-103399872	NA	Marmoset	9483
ENSCJAG00000009549_94-76	19	ENSCJAG00000009549.2_chr11:943368-943487	ENSCJAG00000009549.2_chr11:1106044-1106133	ENSG00000187240_11:103255415-103255534	ENSG00000187240_11:103435943-103436032	NA	Marmoset	9483
ENSCJAG00000009549_96-76	21	ENSCJAG00000009549.2_chr11:943368-943487	ENSCJAG00000009549.2_chr11:1126430-1126511	ENSG00000187240_11:103255415-103255534	ENSG00000187240_11:103456275-103456356	NA	Marmoset	9483
ENSCJAG00000009642_9-9	1	ENSCJAG00000009642.2_chr7:62663781-62664378	ENSCJAG00000009642.2_chr7:62663781-62664378	ENSG00000204138_1:28473554-28474151	ENSG00000204138_1:28473554-28474151	NA	Marmoset	9483
ENSCJAG00000009784_16-11	6	ENSCJAG00000009784.2_chr10:128659728-128659889	ENSCJAG00000009784.2_chr10:128672852-128672909	ENSG00000089902_14:102707351-102707512	ENSG00000089902_14:102721320-102721377	NA	Marmoset	9483
ENSCJAG00000009800_17-14	4	ENSCJAG00000009800.2_chr11:78400209-78400357	ENSCJAG00000009800.2_chr11:78404778-78404891	ENSG00000152270_11:14830698-14830846	ENSG00000152270_11:14834982-14835095	NA	Marmoset	9483
ENSCJAG00000010041_9-3	7	ENSCJAG00000010041.2_chr9:99257882-99258020	ENSCJAG00000010041.2_chr9:99265595-99265705	ENSG00000076555_12:109167896-109168034	ENSG00000076555_12:109176153-109176263	NA	Marmoset	9483
ENSCJAG00000010143_20-20	1	ENSCJAG00000010143.2_chr1:137910901-137911080	ENSCJAG00000010143.2_chr1:137910901-137911080	ENSG00000122707_9:36091164-36091343	ENSG00000122707_9:36091164-36091343	NA	Marmoset	9483
ENSCJAG00000010143_21-10	4	ENSCJAG00000010143.2_chr1:137903940-137904137	ENSCJAG00000010143.2_chr1:137914565-137914777	ENSG00000122707_9:36083365-36083562	ENSG00000122707_9:36100331-36100543	NA	Marmoset	9483
ENSCJAG00000010143_23-10	6	ENSCJAG00000010143.2_chr1:137903940-137904137	ENSCJAG00000010143.2_chr1:137920063-137920203	ENSG00000122707_9:36083365-36083562	ENSG00000122707_9:36105143-36105283	NA	Marmoset	9483
ENSCJAG00000010143_6-4	3	ENSCJAG00000010143.2_chr1:137873626-137873684	ENSCJAG00000010143.2_chr1:137880844-137880880	ENSG00000122707_9:36052265-36052323	ENSG00000122707_9:36060119-36060155	NA	Marmoset	9483
ENSCJAG00000010153_10-2	9	ENSCJAG00000010153.3_chr13:117256538-117256621	ENSCJAG00000010153.3_chr13:117279443-117279649	ENSG00000060069_18:79695225-79695308	ENSG00000060069_18:79717810-79718016	NA	Marmoset	9483
ENSCJAG00000010159_38-31	7	ENSCJAG00000010159.2_chr11:5805774-5805891	ENSCJAG00000010159.2_chr11:5815985-5816184	ENSG00000149311_11:108279491-108279608	ENSG00000149311_11:108289602-108289801	NA	Marmoset	9483
ENSCJAG00000010173_14-12	3	ENSCJAG00000010173.2_chr17:68696910-68696958	ENSCJAG00000010173.2_chr17:68703983-68704105	ENSG00000172939_3:38229687-38229735	ENSG00000172939_3:38236661-38236961	NA	Marmoset	9483
ENSCJAG00000010386_22-22	1	ENSCJAG00000010386.2_chr4:74027204-74027628	ENSCJAG00000010386.2_chr4:74027204-74027628	ENSG00000112701_6:75702645-75703072	ENSG00000112701_6:75702645-75703072	NA	Marmoset	9483
ENSCJAG00000010386_9-2	7	ENSCJAG00000010386.2_chr4:73943044-73943137	ENSCJAG00000010386.2_chr4:73977867-73978012	ENSG00000112701_6:75621532-75621625	ENSG00000112701_6:75659262-75659407	NA	Marmoset	9483
ENSCJAG00000010465_14-7	7	ENSCJAG00000010465.2_chr1:139040234-139040861	ENSCJAG00000010465.2_chr1:139249955-139250050	ENSG00000147905_9:37126312-37126942	ENSG00000147905_9:37349357-37349452	NA	Marmoset	9483
ENSCJAG00000010485_7-2	5	ENSCJAG00000010485.2_chr1:101904388-101904490	ENSCJAG00000010485.2_chr1:101952694-101952779	ENSG00000107099_9:271627-271729	ENSG00000107099_9:317043-317128	NA	Marmoset	9483
ENSCJAG00000010542_16-14	3	ENSCJAG00000010542.2_chr11:97311250-97311311	ENSCJAG00000010542.2_chr11:97312367-97312516	ENSG00000135387_11:34089395-34089456	ENSG00000135387_11:34090529-34090678	NA	Marmoset	9483
ENSCJAG00000010717_33-22	12	ENSCJAG00000010717.2_chr4:2958833-2959005	ENSCJAG00000010717.2_chr4:3034448-3034560	ENSG00000079691_6:25515675-25515847	ENSG00000079691_6:25594415-25594527	NA	Marmoset	9483
ENSCJAG00000010717_33-31	3	ENSCJAG00000010717.2_chr4:3021762-3021828	ENSCJAG00000010717.2_chr4:3034448-3034560	ENSG00000079691_6:25580924-25580990	ENSG00000079691_6:25594415-25594527	NA	Marmoset	9483
ENSCJAG00000010840_17-10	8	ENSCJAG00000010840.2_chr1:140765789-140765858	ENSCJAG00000010840.2_chr1:140774607-140774681	ENSG00000136937_9:97647492-97647561	ENSG00000136937_9:97656011-97656085	NA	Marmoset	9483
ENSCJAG00000010908_10-7	4	ENSCJAG00000010908.2_chr1:194079613-194079718	ENSCJAG00000010908.2_chr1:194080059-194080255	ENSG00000182541_22:31262134-31262239	ENSG00000182541_22:31262595-31262791	NA	Marmoset	9483
ENSCJAG00000010939_20-15	5	ENSCJAG00000010939.2_chr4:55442108-55442152	ENSCJAG00000010939.2_chr4:55526541-55526594	ENSG00000146147_6:54169528-54169572	ENSG00000146147_6:54257308-54257361	NA	Marmoset	9483
ENSCJAG00000010992_11-9	3	ENSCJAG00000010992.2_chr15:33214033-33214179	ENSCJAG00000010992.2_chr15:33216534-33216692	ENSG00000157500_3:57246076-57246222	ENSG00000157500_3:57248193-57248351	NA	Marmoset	9483
ENSCJAG00000011110_11-9	3	ENSCJAG00000011110.2_chr12:76397978-76398205	ENSCJAG00000011110.2_chr12:76400716-76400787	ENSG00000138182_10:89714955-89715182	ENSG00000138182_10:89717424-89717495	NA	Marmoset	9483
ENSCJAG00000011110_14-9	6	ENSCJAG00000011110.2_chr12:76397978-76398205	ENSCJAG00000011110.2_chr12:76402990-76403277	ENSG00000138182_10:89714955-89715182	ENSG00000138182_10:89719419-89719706	NA	Marmoset	9483
ENSCJAG00000011110_7-4	4	ENSCJAG00000011110.2_chr12:76391642-76391728	ENSCJAG00000011110.2_chr12:76393452-76393636	ENSG00000138182_10:89709167-89709253	ENSG00000138182_10:89710961-89711145	NA	Marmoset	9483
ENSCJAG00000011302_16-7	7	ENSCJAG00000011302.2_chr5:32523147-32523333	ENSCJAG00000011302.2_chr5:32544998-32545145	ENSG00000170471_20:38499447-38499633	ENSG00000170471_20:38525895-38526042	NA	Marmoset	9483
ENSCJAG00000011404_13-9	5	ENSCJAG00000011404.2_chr1:143361197-143361368	ENSCJAG00000011404.2_chr1:143383331-143383543	ENSG00000119509_9:100246616-100246787	ENSG00000119509_9:100272864-100273076	NA	Marmoset	9483
ENSCJAG00000011447_13-8	6	ENSCJAG00000011447.2_chr1:107463319-107463410	ENSCJAG00000011447.2_chr1:107476720-107476923	ENSG00000107036_9:5732388-5732479	ENSG00000107036_9:5747302-5747505	NA	Marmoset	9483
ENSCJAG00000011448_7-6	2	ENSCJAG00000011448.2_chr6:129512664-129512771	ENSCJAG00000011448.2_chr6:129518530-129518647	ENSG00000144451_2:213340163-213340270	ENSG00000144451_2:213350528-213350645	NA	Marmoset	9483
ENSCJAG00000011470_5-4	2	ENSCJAG00000011470.2_chr5:32766395-32766612	ENSCJAG00000011470.2_chr5:32767272-32767454	ENSG00000101442_20:38754957-38755174	ENSG00000101442_20:38755857-38756039	NA	Marmoset	9483
ENSCJAG00000011619_2-2	1	ENSCJAG00000011619.1_chr1:108056380-108056610	ENSCJAG00000011619.1_chr1:108056380-108056610	ENSG00000147854_9:6420912-6421142	ENSG00000147854_9:6420912-6421142	NA	Marmoset	9483
ENSCJAG00000011746_21-20	2	ENSCJAG00000011746.2_chr1:108663066-108663279	ENSCJAG00000011746.2_chr1:108665078-108665154	ENSG00000107077_9:7013788-7014001	ENSG00000107077_9:7015853-7015929	NA	Marmoset	9483
ENSCJAG00000011746_23-16	8	ENSCJAG00000011746.2_chr1:108635025-108635234	ENSCJAG00000011746.2_chr1:108700207-108700315	ENSG00000107077_9:6986344-6986666	ENSG00000107077_9:7049092-7049200	NA	Marmoset	9483
ENSCJAG00000011746_23-20	4	ENSCJAG00000011746.2_chr1:108663066-108663279	ENSCJAG00000011746.2_chr1:108700207-108700315	ENSG00000107077_9:7013788-7014001	ENSG00000107077_9:7049092-7049200	NA	Marmoset	9483
ENSCJAG00000011867_18-7	12	ENSCJAG00000011867.2_chr4:49049531-49049718	ENSCJAG00000011867.2_chr4:49088846-49088909	ENSG00000198087_6:47574064-47574251	ENSG00000198087_6:47612473-47612536	NA	Marmoset	9483
ENSCJAG00000011978_3-3	1	ENSCJAG00000011978.2_chr11:11596974-11598331	ENSCJAG00000011978.2_chr11:11596974-11598331	ENSG00000109906_11:114063211-114064568	ENSG00000109906_11:114063211-114064568	NA	Marmoset	9483
ENSCJAG00000012212_3-3	1	ENSCJAG00000012212.2_chr7:149939121-149939303	ENSCJAG00000012212.2_chr7:149939121-149939303	ENSG00000118655_1:113908009-113908191	ENSG00000118655_1:113908009-113908191	NA	Marmoset	9483
ENSCJAG00000012414_10-8	3	ENSCJAG00000012414.2_chr17:67482119-67482192	ENSCJAG00000012414.2_chr17:67486155-67486246	ENSG00000076242_3:37004401-37004474	ENSG00000076242_3:37008814-37008905	NA	Marmoset	9483
ENSCJAG00000012511_23-22	2	ENSCJAG00000012511.3_chr13:29109904-29110010	ENSCJAG00000012511.3_chr13:29119325-29119512	ENSG00000165392_8:31100849-31100955	ENSG00000165392_8:31111615-31111799	NA	Marmoset	9483
ENSCJAG00000012511_37-28	10	ENSCJAG00000012511.3_chr13:29139281-29139422	ENSCJAG00000012511.3_chr13:29163853-29164015	ENSG00000165392_8:31132365-31132506	ENSG00000165392_8:31157368-31157530	NA	Marmoset	9483
ENSCJAG00000012538_16-12	4	ENSCJAG00000012538.1_chr1:117513383-117513529	ENSCJAG00000012538.1_chr1:117543763-117543923	ENSG00000164989_9:15623267-15623413	ENSG00000164989_9:15666163-15666323	NA	Marmoset	9483
ENSCJAG00000012538_23-19	5	ENSCJAG00000012538.1_chr1:117606025-117606131	ENSCJAG00000012538.1_chr1:117614579-117614767	ENSG00000164989_9:15721769-15721875	ENSG00000164989_9:15729610-15729798	NA	Marmoset	9483
ENSCJAG00000012600_27-18	10	ENSCJAG00000012600.2_chr1:119365596-119365689	ENSCJAG00000012600.2_chr1:119437999-119438076	ENSG00000044459_9:17415788-17415881	ENSG00000044459_9:17486989-17487066	NA	Marmoset	9483
ENSCJAG00000012631_26-18	7	ENSCJAG00000012631.2_chr4:155745606-155745799	ENSCJAG00000012631.2_chr4:155760686-155760830	ENSG00000213079_6:154810015-154810208	ENSG00000213079_6:154824234-154824378	NA	Marmoset	9483
ENSCJAG00000012661_26-14	13	ENSCJAG00000012661.2_chr17:67982471-67982625	ENSCJAG00000012661.2_chr17:68232366-68232467	ENSG00000144668_3:37533314-37533468	ENSG00000144668_3:37784977-37785078	NA	Marmoset	9483
ENSCJAG00000012844_25-14	6	ENSCJAG00000012844.2_chr20:43073127-43073219	ENSCJAG00000012844.2_chr20:43084693-43084964	ENSG00000158545_16:88598620-88598712	ENSG00000158545_16:88611268-88611536	NA	Marmoset	9483
ENSCJAG00000012999_12-3	10	ENSCJAG00000012999.2_chr15:1324591-1324716	ENSCJAG00000012999.2_chr15:1370338-1370431	ENSG00000058056_3:179681878-179682003	ENSG00000058056_3:179730616-179730709	NA	Marmoset	9483
ENSCJAG00000012999_19-13	7	ENSCJAG00000012999.2_chr15:1382091-1382216	ENSCJAG00000012999.2_chr15:1399538-1399681	ENSG00000058056_3:179740247-179740372	ENSG00000058056_3:179761112-179761255	NA	Marmoset	9483
ENSCJAG00000013214_13-10	4	ENSCJAG00000013214.2_chr6:93964777-93964865	ENSCJAG00000013214.2_chr6:93991987-93992055	ENSG00000088179_2:119900718-119900806	ENSG00000088179_2:119926598-119926666	NA	Marmoset	9483
ENSCJAG00000013332_8-8	1	ENSCJAG00000013332.2_chr7:28306872-28307014	ENSCJAG00000013332.2_chr7:28306872-28307014	ENSG00000148516_10:31387124-31387266	ENSG00000148516_10:31387124-31387266	NA	Marmoset	9483
ENSCJAG00000013414_34-17	7	ENSCJAG00000013414.2_chr4:151638105-151638200	ENSCJAG00000013414.2_chr4:151650590-151651058	ENSG00000120278_6:150819679-150819774	ENSG00000120278_6:150830582-150832205	NA	Marmoset	9483
ENSCJAG00000013427_29-16	11	ENSCJAG00000013427.2_chr12:34219862-34219990	ENSCJAG00000013427.2_chr12:34255185-34255889	ENSG00000225830_10:49500538-49506480	ENSG00000225830_10:49470182-49470889	NA	Marmoset	9483
ENSCJAG00000013674_11-4	8	ENSCJAG00000013674.2_chr6:148441036-148441180	ENSCJAG00000013674.2_chr6:148577276-148577523	ENSG00000144535_2:232014835-232014979	ENSG00000144535_2:232136472-232136719	NA	Marmoset	9483
ENSCJAG00000013674_15-4	12	ENSCJAG00000013674.2_chr6:148441036-148441180	ENSCJAG00000013674.2_chr6:148695514-148695621	ENSG00000144535_2:232014835-232014979	ENSG00000144535_2:232249239-232249346	NA	Marmoset	9483
ENSCJAG00000013674_15-9	7	ENSCJAG00000013674.2_chr6:148571360-148571460	ENSCJAG00000013674.2_chr6:148695514-148695621	ENSG00000144535_2:232130619-232130719	ENSG00000144535_2:232249239-232249346	NA	Marmoset	9483
ENSCJAG00000013674_16-9	8	ENSCJAG00000013674.2_chr6:148571360-148571460	ENSCJAG00000013674.2_chr6:148715792-148716025	ENSG00000144535_2:232130619-232130719	ENSG00000144535_2:232263207-232263440	NA	Marmoset	9483
ENSCJAG00000013995_15-3	13	ENSCJAG00000013995.2_chr6:149701254-149701359	ENSCJAG00000013995.2_chr6:149716996-149717067	ENSG00000085978_2:233263130-233263235	ENSG00000085978_2:233282682-233282753	NA	Marmoset	9483
ENSCJAG00000014082_25-13	13	ENSCJAG00000014082.2_chr12:114983982-114984054	ENSCJAG00000014082.2_chr12:115035571-115035679	ENSG00000150760_10:127008732-127008804	ENSG00000150760_10:127061668-127061776	NA	Marmoset	9483
ENSCJAG00000014082_25-24	2	ENSCJAG00000014082.2_chr12:115026784-115026918	ENSCJAG00000014082.2_chr12:115035571-115035679	ENSG00000150760_10:127052681-127052815	ENSG00000150760_10:127061668-127061776	NA	Marmoset	9483
ENSCJAG00000014464_42-41	2	ENSCJAG00000014464.2_chr14:64734609-64734681	ENSCJAG00000014464.2_chr14:64738497-64738650	ENSG00000115970_2:43291696-43292222	ENSG00000115970_2:43286908-43287061	NA	Marmoset	9483
ENSCJAG00000014664_30-16	15	ENSCJAG00000014664.2_chr10:96260582-96260753	ENSCJAG00000014664.2_chr10:96302521-96302751	ENSG00000100731_14:71026117-71026288	ENSG00000100731_14:71076189-71076419	NA	Marmoset	9483
ENSCJAG00000014664_30-29	2	ENSCJAG00000014664.2_chr10:96299835-96300088	ENSCJAG00000014664.2_chr10:96302521-96302751	ENSG00000100731_14:71073545-71073759	ENSG00000100731_14:71076189-71076419	NA	Marmoset	9483
ENSCJAG00000014866_25-17	9	ENSCJAG00000014866.2_chr15:6475773-6475847	ENSCJAG00000014866.2_chr15:6518457-6518508	ENSG00000156931_3:184866876-184866950	ENSG00000156931_3:184900921-184900972	NA	Marmoset	9483
ENSCJAG00000014866_29-26	4	ENSCJAG00000014866.2_chr15:6528514-6528556	ENSCJAG00000014866.2_chr15:6535472-6535543	ENSG00000156931_3:184913519-184913561	ENSG00000156931_3:184920127-184920198	NA	Marmoset	9483
ENSCJAG00000014985_12-10	3	ENSCJAG00000014985.2_chr9:96403584-96403706	ENSCJAG00000014985.2_chr9:96415024-96415158	ENSG00000013503_12:106393031-106393153	ENSG00000013503_12:106410826-106410960	NA	Marmoset	9483
ENSCJAG00000014985_12-7	6	ENSCJAG00000014985.2_chr9:96386514-96386605	ENSCJAG00000014985.2_chr9:96415024-96415158	ENSG00000013503_12:106376359-106376450	ENSG00000013503_12:106410826-106410960	NA	Marmoset	9483
ENSCJAG00000014985_18-11	8	ENSCJAG00000014985.2_chr9:96410562-96410681	ENSCJAG00000014985.2_chr9:96450868-96450966	ENSG00000013503_12:106405857-106405976	ENSG00000013503_12:106437681-106437779	NA	Marmoset	9483
ENSCJAG00000015140_15-11	5	ENSCJAG00000015140.2_chr4:82667008-82667148	ENSCJAG00000015140.2_chr4:82682442-82682606	ENSG00000065615_6:83934595-83934735	ENSG00000065615_6:83955298-83955462	NA	Marmoset	9483
ENSCJAG00000015262_16-9	8	ENSCJAG00000015262.3_chr20:23544226-23544360	ENSCJAG00000015262.3_chr20:23567646-23567889	ENSG00000102908_16:69669977-69670111	ENSG00000102908_16:69695136-69695379	NA	Marmoset	9483
ENSCJAG00000015333_16-7	10	ENSCJAG00000015333.2_chr4:35707222-35707313	ENSCJAG00000015333.2_chr4:35731581-35731774	ENSG00000065060_6:34823257-34823348	ENSG00000065060_6:34857724-34857917	NA	Marmoset	9483
ENSCJAG00000015408_5-5	1	ENSCJAG00000015408.2_chr20:23091849-23092062	ENSCJAG00000015408.2_chr20:23091849-23092062	ENSG00000168807_16:69245602-69245815	ENSG00000168807_16:69245602-69245815	NA	Marmoset	9483
ENSCJAG00000015449_23-8	9	ENSCJAG00000015449.2_chr5:87420460-87420574	ENSCJAG00000015449.2_chr5:87461634-87461705	ENSG00000275700_17:36986617-36986731	ENSG00000275700_17:37031365-37031685	NA	Marmoset	9483
ENSCJAG00000015482_19-3	17	ENSCJAG00000015482.2_chr20:22681778-22682418	ENSCJAG00000015482.2_chr20:22808972-22809112	ENSG00000103047_16:68859884-68860524	ENSG00000103047_16:68973872-68974168	NA	Marmoset	9483
ENSCJAG00000015641_5-5	1	ENSCJAG00000015641.2_chr12:81065392-81065708	ENSCJAG00000015641.2_chr12:81065392-81065708	ENSG00000138193_10:94171180-94171496	ENSG00000138193_10:94171180-94171496	NA	Marmoset	9483
ENSCJAG00000015678_11-3	9	ENSCJAG00000015678.2_chr16:3294920-3294976	ENSCJAG00000015678.2_chr16:3445894-3445932	ENSG00000147481_8:50438543-50438599	ENSG00000147481_8:50590879-50590917	NA	Marmoset	9483
ENSCJAG00000015699_32-27	6	ENSCJAG00000015699.2_chr6:23700608-23700735	ENSCJAG00000015699.2_chr6:23733912-23734098	ENSG00000156218_15:83988691-83988818	ENSG00000156218_15:84021410-84021593	NA	Marmoset	9483
ENSCJAG00000015699_5-3	3	ENSCJAG00000015699.2_chr6:23447774-23447901	ENSCJAG00000015699.2_chr6:23526055-23526291	ENSG00000156218_15:83773523-83773650	ENSG00000156218_15:83819811-83820047	NA	Marmoset	9483
ENSCJAG00000015699_5-5	1	ENSCJAG00000015699.2_chr6:23526055-23526291	ENSCJAG00000015699.2_chr6:23526055-23526291	ENSG00000156218_15:83819811-83820047	ENSG00000156218_15:83819811-83820047	NA	Marmoset	9483
ENSCJAG00000015726_14-14	1	ENSCJAG00000015726.2_chr20:21990868-21991875	ENSCJAG00000015726.2_chr20:21990868-21991875	ENSG00000072736_16:68190768-68191775	ENSG00000072736_16:68190768-68191775	NA	Marmoset	9483
ENSCJAG00000015726_7-7	2	ENSCJAG00000015726.2_chr20:21913212-21914346	ENSCJAG00000015726.2_chr20:21913211-21914346	ENSG00000072736_16:68121987-68123121	ENSG00000072736_16:68121987-68123121	NA	Marmoset	9483
ENSCJAG00000015736_25-21	5	ENSCJAG00000015736.2_chr11:123956206-123956414	ENSCJAG00000015736.2_chr11:123967213-123967449	ENSG00000162337_11:68423489-68423697	ENSG00000162337_11:68433602-68433838	NA	Marmoset	9483
ENSCJAG00000016027_20-4	14	ENSCJAG00000016027.2_chr10:69558970-69559126	ENSCJAG00000016027.2_chr10:69606488-69606552	ENSG00000198718_14:44995746-44995902	ENSG00000198718_14:45046545-45046703	NA	Marmoset	9483
ENSCJAG00000016082_4-4	1	ENSCJAG00000016082.2_chr3:84240095-84240841	ENSCJAG00000016082.2_chr3:84240095-84240841	ENSG00000138802_4:109462901-109463644	ENSG00000138802_4:109462901-109463644	NA	Marmoset	9483
ENSCJAG00000016186_19-8	11	ENSCJAG00000016186.2_chr7:97073347-97073556	ENSCJAG00000016186.2_chr7:97123415-97123546	ENSG00000132849_1:61787754-61787972	ENSG00000132849_1:61833654-61833785	NA	Marmoset	9483
ENSCJAG00000016433_8-5	4	ENSCJAG00000016433.2_chr14:17213703-17213835	ENSCJAG00000016433.2_chr14:17217172-17217343	ENSG00000125630_2:112549267-112549360	ENSG00000125630_2:112552645-112552816	NA	Marmoset	9483
ENSCJAG00000016583_14-12	3	ENSCJAG00000016583.2_chr15:63345566-63345656	ENSCJAG00000016583.2_chr15:63350982-63351140	ENSG00000197548_3:11340645-11340735	ENSG00000197548_3:11347877-11348035	NA	Marmoset	9483
ENSCJAG00000016583_18-10	9	ENSCJAG00000016583.2_chr15:63336581-63336669	ENSCJAG00000016583.2_chr15:63366857-63366932	ENSG00000197548_3:11331340-11331428	ENSG00000197548_3:11364657-11364734	NA	Marmoset	9483
ENSCJAG00000016583_19-12	8	ENSCJAG00000016583.2_chr15:63345566-63345656	ENSCJAG00000016583.2_chr15:63379081-63379161	ENSG00000197548_3:11340645-11340735	ENSG00000197548_3:11379972-11380052	NA	Marmoset	9483
ENSCJAG00000016656_12-11	2	ENSCJAG00000016656.3_chr7:100156854-100156998	ENSCJAG00000016656.3_chr7:100158296-100158512	ENSG00000158966_1:64632599-64632743	ENSG00000158966_1:64634044-64634260	NA	Marmoset	9483
ENSCJAG00000016656_12-8	5	ENSCJAG00000016656.3_chr7:100125889-100125995	ENSCJAG00000016656.3_chr7:100158296-100158512	ENSG00000158966_1:64602806-64602912	ENSG00000158966_1:64634044-64634260	NA	Marmoset	9483
ENSCJAG00000016687_10-10	1	ENSCJAG00000016687.2_chr15:64372968-64373418	ENSCJAG00000016687.2_chr15:64372968-64373418	ENSG00000132170_3:12416704-12417154	ENSG00000132170_3:12416704-12417154	NA	Marmoset	9483
ENSCJAG00000016800_15-3	13	ENSCJAG00000016800.2_chr1:148836078-148836173	ENSCJAG00000016800.2_chr1:148893030-148893118	ENSG00000106701_9:105464236-105464331	ENSG00000106701_9:105539263-105539351	NA	Marmoset	9483
ENSCJAG00000016800_15-9	7	ENSCJAG00000016800.2_chr1:148876452-148876550	ENSCJAG00000016800.2_chr1:148893030-148893118	ENSG00000106701_9:105508617-105508715	ENSG00000106701_9:105539263-105539351	NA	Marmoset	9483
ENSCJAG00000016800_5-3	3	ENSCJAG00000016800.2_chr1:148836078-148836173	ENSCJAG00000016800.2_chr1:148845827-148845928	ENSG00000106701_9:105464236-105464331	ENSG00000106701_9:105471904-105472005	NA	Marmoset	9483
ENSCJAG00000017044_4-4	1	ENSCJAG00000017044.2_chr8:83340422-83340511	ENSCJAG00000017044.2_chr8:83340422-83340511	ENSG00000128573_7:114534617-114534706	ENSG00000128573_7:114534617-114534706	NA	Marmoset	9483
ENSCJAG00000017054_10-10	1	ENSCJAG00000017054.2_chr19:36267423-36267900	ENSCJAG00000017054.2_chr19:36267423-36267900	ENSG00000179397_1:244560668-244561145	ENSG00000179397_1:244560668-244561145	NA	Marmoset	9483
ENSCJAG00000017131_12-9	4	ENSCJAG00000017131.2_chr15:66885257-66885390	ENSCJAG00000017131.2_chr15:66892262-66892401	ENSG00000177463_3:15028586-15028719	ENSG00000177463_3:15034324-15034809	NA	Marmoset	9483
ENSCJAG00000017131_4-4	2	ENSCJAG00000017131.2_chr15:66870266-66870466	ENSCJAG00000017131.2_chr15:66870263-66870466	ENSG00000177463_3:15013589-15013789	ENSG00000177463_3:15013589-15013789	NA	Marmoset	9483
ENSCJAG00000017276_14-8	7	ENSCJAG00000017276.2_chr7:102530276-102530300	ENSCJAG00000017276.2_chr7:102550600-102550664	ENSG00000198160_1:66940028-66940052	ENSG00000198160_1:66959679-66959743	NA	Marmoset	9483
ENSCJAG00000017649_18-10	7	ENSCJAG00000017649.2_chr10:115542978-115543145	ENSCJAG00000017649.2_chr10:115588682-115588790	ENSG00000042088_14:89984516-89984683	ENSG00000042088_14:90033106-90033214	NA	Marmoset	9483
ENSCJAG00000017656_27-25	3	ENSCJAG00000017656.3_chr5:155374799-155374916	ENSCJAG00000017656.3_chr5:155376152-155376248	ENSG00000102780_13:42198478-42198595	ENSG00000102780_13:42199813-42199909	NA	Marmoset	9483
ENSCJAG00000017656_27-8	15	ENSCJAG00000017656.3_chr5:155339691-155339793	ENSCJAG00000017656.3_chr5:155376152-155376248	ENSG00000102780_13:42165331-42165433	ENSG00000102780_13:42199813-42199909	NA	Marmoset	9483
ENSCJAG00000017656_35-23	13	ENSCJAG00000017656.3_chr5:155371444-155371578	ENSCJAG00000017656.3_chr5:155401019-155401127	ENSG00000102780_13:42194885-42195016	ENSG00000102780_13:42219686-42219794	NA	Marmoset	9483
ENSCJAG00000017696_10-4	7	ENSCJAG00000017696.2_chr5:154543553-154543657	ENSCJAG00000017696.2_chr5:154557046-154557141	ENSG00000172766_13:41318806-41318910	ENSG00000172766_13:41331274-41331369	NA	Marmoset	9483
ENSCJAG00000017696_15-9	6	ENSCJAG00000017696.2_chr5:154554476-154554595	ENSCJAG00000017696.2_chr5:154578588-154578716	ENSG00000172766_13:41328724-41328843	ENSG00000172766_13:41362031-41362159	NA	Marmoset	9483
ENSCJAG00000017798_21-9	10	ENSCJAG00000017798.2_chr9:40590101-40590322	ENSCJAG00000017798.2_chr9:40634953-40635191	ENSG00000196876_12:51699570-51699791	ENSG00000196876_12:51751355-51751593	NA	Marmoset	9483
ENSCJAG00000017806_6-5	2	ENSCJAG00000017806.2_chr5:38075466-38075531	ENSCJAG00000017806.2_chr5:38115540-38115785	ENSG00000124191_20:43973367-43973432	ENSG00000124191_20:44006547-44006792	NA	Marmoset	9483
ENSCJAG00000018181_10-7	3	ENSCJAG00000018181.2_chr10:15043617-15043728	ENSCJAG00000018181.2_chr10:15053776-15053903	ENSG00000140463_15:72715291-72715402	ENSG00000140463_15:72724528-72724655	NA	Marmoset	9483
ENSCJAG00000018192_10-7	2	ENSCJAG00000018192.2_chr12:90763061-90763116	ENSCJAG00000018192.2_chr12:90764357-90764453	ENSG00000156374_10:103347395-103347450	ENSG00000156374_10:103348355-103348812	NA	Marmoset	9483
ENSCJAG00000018225_18-6	12	ENSCJAG00000018225.2_chr5:148228276-148228397	ENSCJAG00000018225.2_chr5:148306971-148307063	ENSG00000172915_13:35048563-35048684	ENSG00000172915_13:35123482-35123574	NA	Marmoset	9483
ENSCJAG00000018225_42-20	20	ENSCJAG00000018225.2_chr5:148337030-148337111	ENSCJAG00000018225.2_chr5:148420630-148420757	ENSG00000172915_13:35155774-35155855	ENSG00000172915_13:35232492-35232619	NA	Marmoset	9483
ENSCJAG00000018225_9-5	5	ENSCJAG00000018225.2_chr5:148224682-148224777	ENSCJAG00000018225.2_chr5:148244590-148244736	ENSG00000172915_13:35045306-35045401	ENSG00000172915_13:35058717-35058863	NA	Marmoset	9483
ENSCJAG00000018315_11-3	9	ENSCJAG00000018315.2_chr2:39898520-39898615	ENSCJAG00000018315.2_chr2:39938905-39938999	ENSG00000145819_5:142873400-142873495	ENSG00000145819_5:142913199-142913293	NA	Marmoset	9483
ENSCJAG00000018315_22-3	19	ENSCJAG00000018315.2_chr2:39898520-39898615	ENSCJAG00000018315.2_chr2:40086120-40086225	ENSG00000145819_5:142873400-142873495	ENSG00000145819_5:143057642-143057747	NA	Marmoset	9483
ENSCJAG00000018323_22-22	1	ENSCJAG00000018323.2_chr19:48207411-48207599	ENSCJAG00000018323.2_chr19:48207411-48207599	ENSG00000162946_1:231818329-231818517	ENSG00000162946_1:231818329-231818517	NA	Marmoset	9483
ENSCJAG00000018324_12-11	2	ENSCJAG00000018324.2_chr20:1043445-1043540	ENSCJAG00000018324.2_chr20:1044671-1044868	ENSG00000102893_16:47587668-47587763	ENSG00000102893_16:47588905-47589102	NA	Marmoset	9483
ENSCJAG00000018324_12-4	8	ENSCJAG00000018324.2_chr20:967517-967606	ENSCJAG00000018324.2_chr20:1044671-1044868	ENSG00000102893_16:47497399-47497488	ENSG00000102893_16:47588905-47589102	NA	Marmoset	9483
ENSCJAG00000018324_16-11	5	ENSCJAG00000018324.2_chr20:1043445-1043540	ENSCJAG00000018324.2_chr20:1071895-1071989	ENSG00000102893_16:47587668-47587763	ENSG00000102893_16:47610826-47610920	NA	Marmoset	9483
ENSCJAG00000018428_21-8	14	ENSCJAG00000018428.2_chr5:145830587-145830727	ENSCJAG00000018428.2_chr5:145893676-145893834	ENSG00000083642_13:32673216-32673356	ENSG00000083642_13:32735172-32735330	NA	Marmoset	9483
ENSCJAG00000018513_23-9	12	ENSCJAG00000018513.2_chr12:92651580-92651759	ENSCJAG00000018513.2_chr12:92729822-92729955	ENSG00000156395_10:105147617-105147796	ENSG00000156395_10:105223116-105223249	NA	Marmoset	9483
ENSCJAG00000018523_17-12	6	ENSCJAG00000018523.2_chr10:81419286-81419457	ENSCJAG00000018523.2_chr10:81434256-81434346	ENSG00000070269_14:56621531-56621702	ENSG00000070269_14:56636508-56636598	NA	Marmoset	9483
ENSCJAG00000018570_17-13	5	ENSCJAG00000018570.2_chr5:144357350-144357413	ENSCJAG00000018570.2_chr5:144373525-144373624	ENSG00000187676_13:31269214-31269277	ENSG00000187676_13:31286720-31286819	NA	Marmoset	9483
ENSCJAG00000018729_6-2	5	ENSCJAG00000018729.2_chr5:136457525-136457719	ENSCJAG00000018729.2_chr5:136531892-136531964	ENSG00000102683_13:23203695-23203889	ENSG00000102683_13:23295415-23295487	NA	Marmoset	9483
ENSCJAG00000019005_4-4	1	ENSCJAG00000019005.2_chr12:55622789-55625093	ENSCJAG00000019005.2_chr12:55622789-55625093	ENSG00000138336_10:68644698-68647005	ENSG00000138336_10:68644698-68647005	NA	Marmoset	9483
ENSCJAG00000019161_13-7	7	ENSCJAG00000019161.2_chr10:86050132-86050214	ENSCJAG00000019161.2_chr10:86058951-86059051	ENSG00000139974_14:61037059-61037141	ENSG00000139974_14:61046067-61046167	NA	Marmoset	9483
ENSCJAG00000019189_16-6	11	ENSCJAG00000019189.2_chr12:107723511-107723600	ENSCJAG00000019189.2_chr12:107758815-107758917	ENSG00000107651_10:119909041-119909130	ENSG00000107651_10:119930329-119930431	NA	Marmoset	9483
[truncated: 453 more rows]
