# Supplementary material for: Evolutionary dynamics of circular RNAs in primates
Source: eLife. 2021 Sep 20;10:e69148. doi: 10.7554/eLife.69148 (PMC8516421; doi:10.7554/eLife.69148)
Supplement: Supplementary file 5. [file elife-69148-supp5.csv]

Primate	GTF file / version	Genome	Chain file
Human	Homo_sapiens.GRCh38.97.gtf.gz	GRCh38	NA
Baboon	Papio_anubis.Panu_3.0.95.gtf.gz	Papio_anubis.Panu_3.0	papAnu4ToHg38.over.chain.gz
Chimpanzee	Pan_troglodytes.Pan_tro_3.0.95.gtf.gz	Pan_troglodytes.Pan_tro_3.0	panTro3ToHg38.over.chain.gz
Lemur	micMur2.ensGene.gtf	micMur2	micMur2ToHg38.over.chain.gz
Macaca	Macaca_fascicularis.Macaca_fascicularis_5.0.99.gtf	Macaca_fascicularis.Macaca_fascicularis_5.0	macFas5ToHg38.over.chain.gz
Macaque	Macaca_mulatta.Mmul_8.0.1.97.gtf	Macaca_mulatta.Mmul_8.0.1	rheMac8ToHg38.over.chain.gz
Marmoset	calJac3.ensGene.gtf	calJac3	calJac3ToHg38.over.chain.gz
Squirrel Monkey	Saimiri_boliviensis_boliviensis.SaiBol1.0.99.gtf.gz	Saimiri_boliviensis_boliviensis.SaiBol1.0	saiBol1ToHg38.over.chain.gz
