# Supplementary material for: Evolutionary dynamics of circular RNAs in primates
Source: eLife. 2021 Sep 20;10:e69148. doi: 10.7554/eLife.69148 (PMC8516421; doi:10.7554/eLife.69148)
Supplement: Supplementary file 6. [file elife-69148-supp6.csv]

Primate	Species ID	Origianal Tissue	Sample Name	SRA ID	GEO ID	Depth
Baboon	9555	Pituitary;TemporalLobe	Brain	SRR1758903;SRR1758904		159,382,497
Chimpanzee	9598	Pituitary;TemporalLobe	Brain	SRR1758918;SRR1758919		114,452,026
Chimpanzee	9598	Liver;Liver	Liver	SRR1758924;SRR1758925		51,787,161
Chimpanzee	9598	SkeletalMuscle;SkeletalMuscle	Skeletal Muscle	SRR1758929;SRR1758930		55124384
Chimpanzee	9598	Spleen;Spleen	Spleen	SRR1758931;SRR1758932		56162283
Lemur	30608	Cerebellum;Cerebellum	Cerebellum	SRR1758989;SRR1758990		73983545
Lemur	30608	FrontalCortex;FrontalCortex	Frontal Cortex	SRR1758991;SRR1758992		64953796
Lemur	30608	SkeletalMuscle;SkeletalMuscle;SkeletalMuscle	Skeletal Muscle	SRR1758999;SRR1759000;SRR1759001		87995821
Lemur	30608	Spleen;Spleen	Spleen	SRR1759002;SRR1759003		58115894
Macaca	9541	Pituitary;TemporalLobe;Pituitary;TemporalLobe	Brain	SRR1758937;SRR1758951;SRR1758952;SRR1758938		126,302,798
Macaca	9541	Cerebellum;Cerebellum	Cerebellum	SRR1758948;SRR1758949		79,474,214
Marmoset	9483	BrainLeftHemisphere;BrainRightHemisphere;Pituitary	Brain	SRR1758977;SRR1758979;SRR1758978		182,005,079
Squirrel Monkey	9521	TemporalLobe;Pituitary	Brain	SRR1759036;SRR1759037		113278077
