# Supplementary figures and images for: Evolutionary dynamics of circular RNAs in primates
Source: eLife journal article supplement (doi:10.7554/elife.69148), 2021-09-20

A)

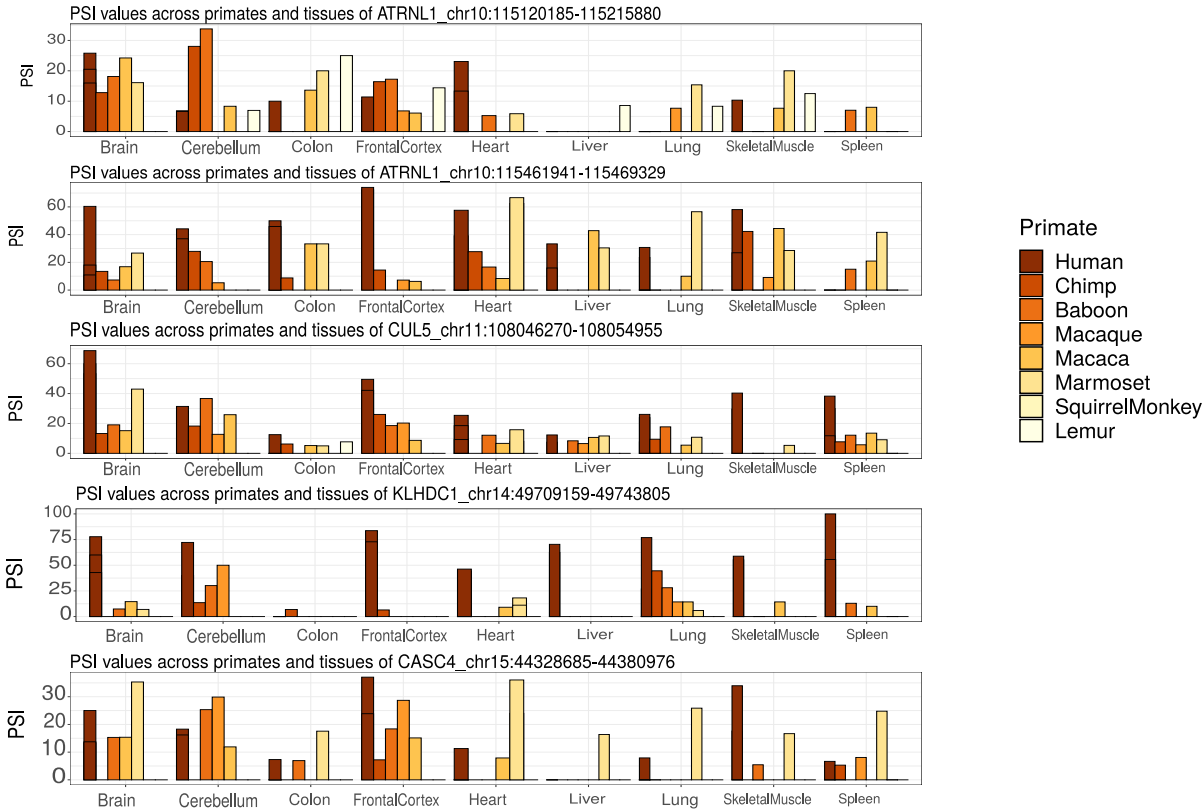

B)

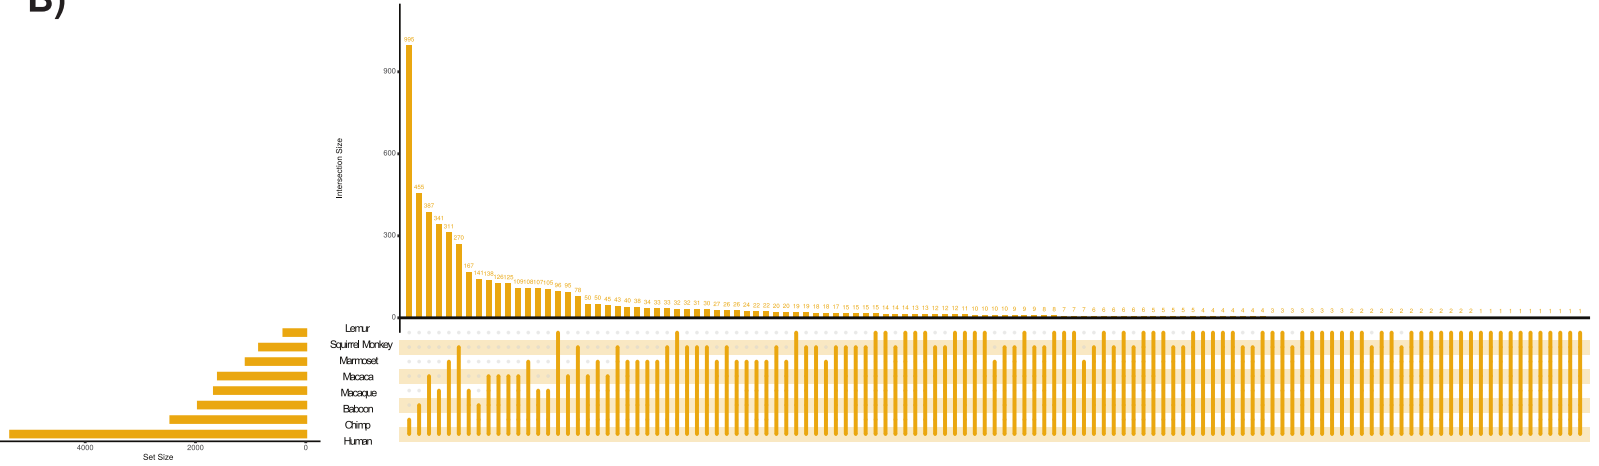

C)

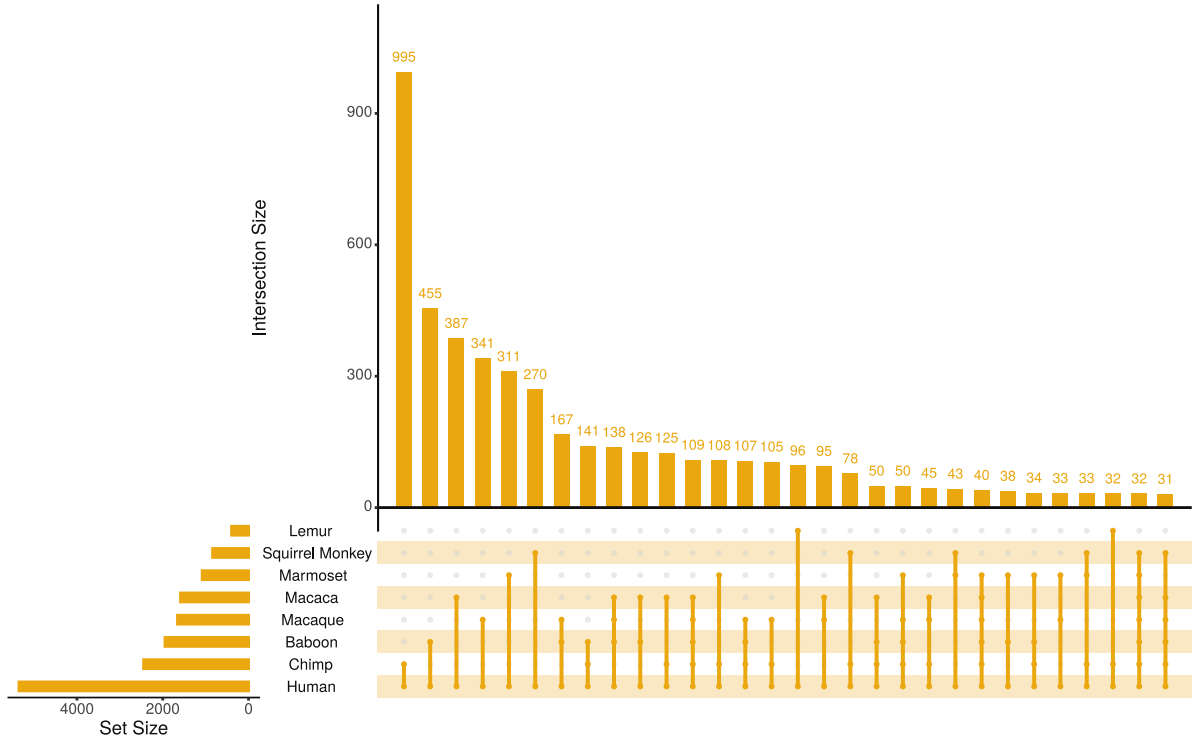

Supplement: supp [file elife-69148-supp-v1.zip]

A)

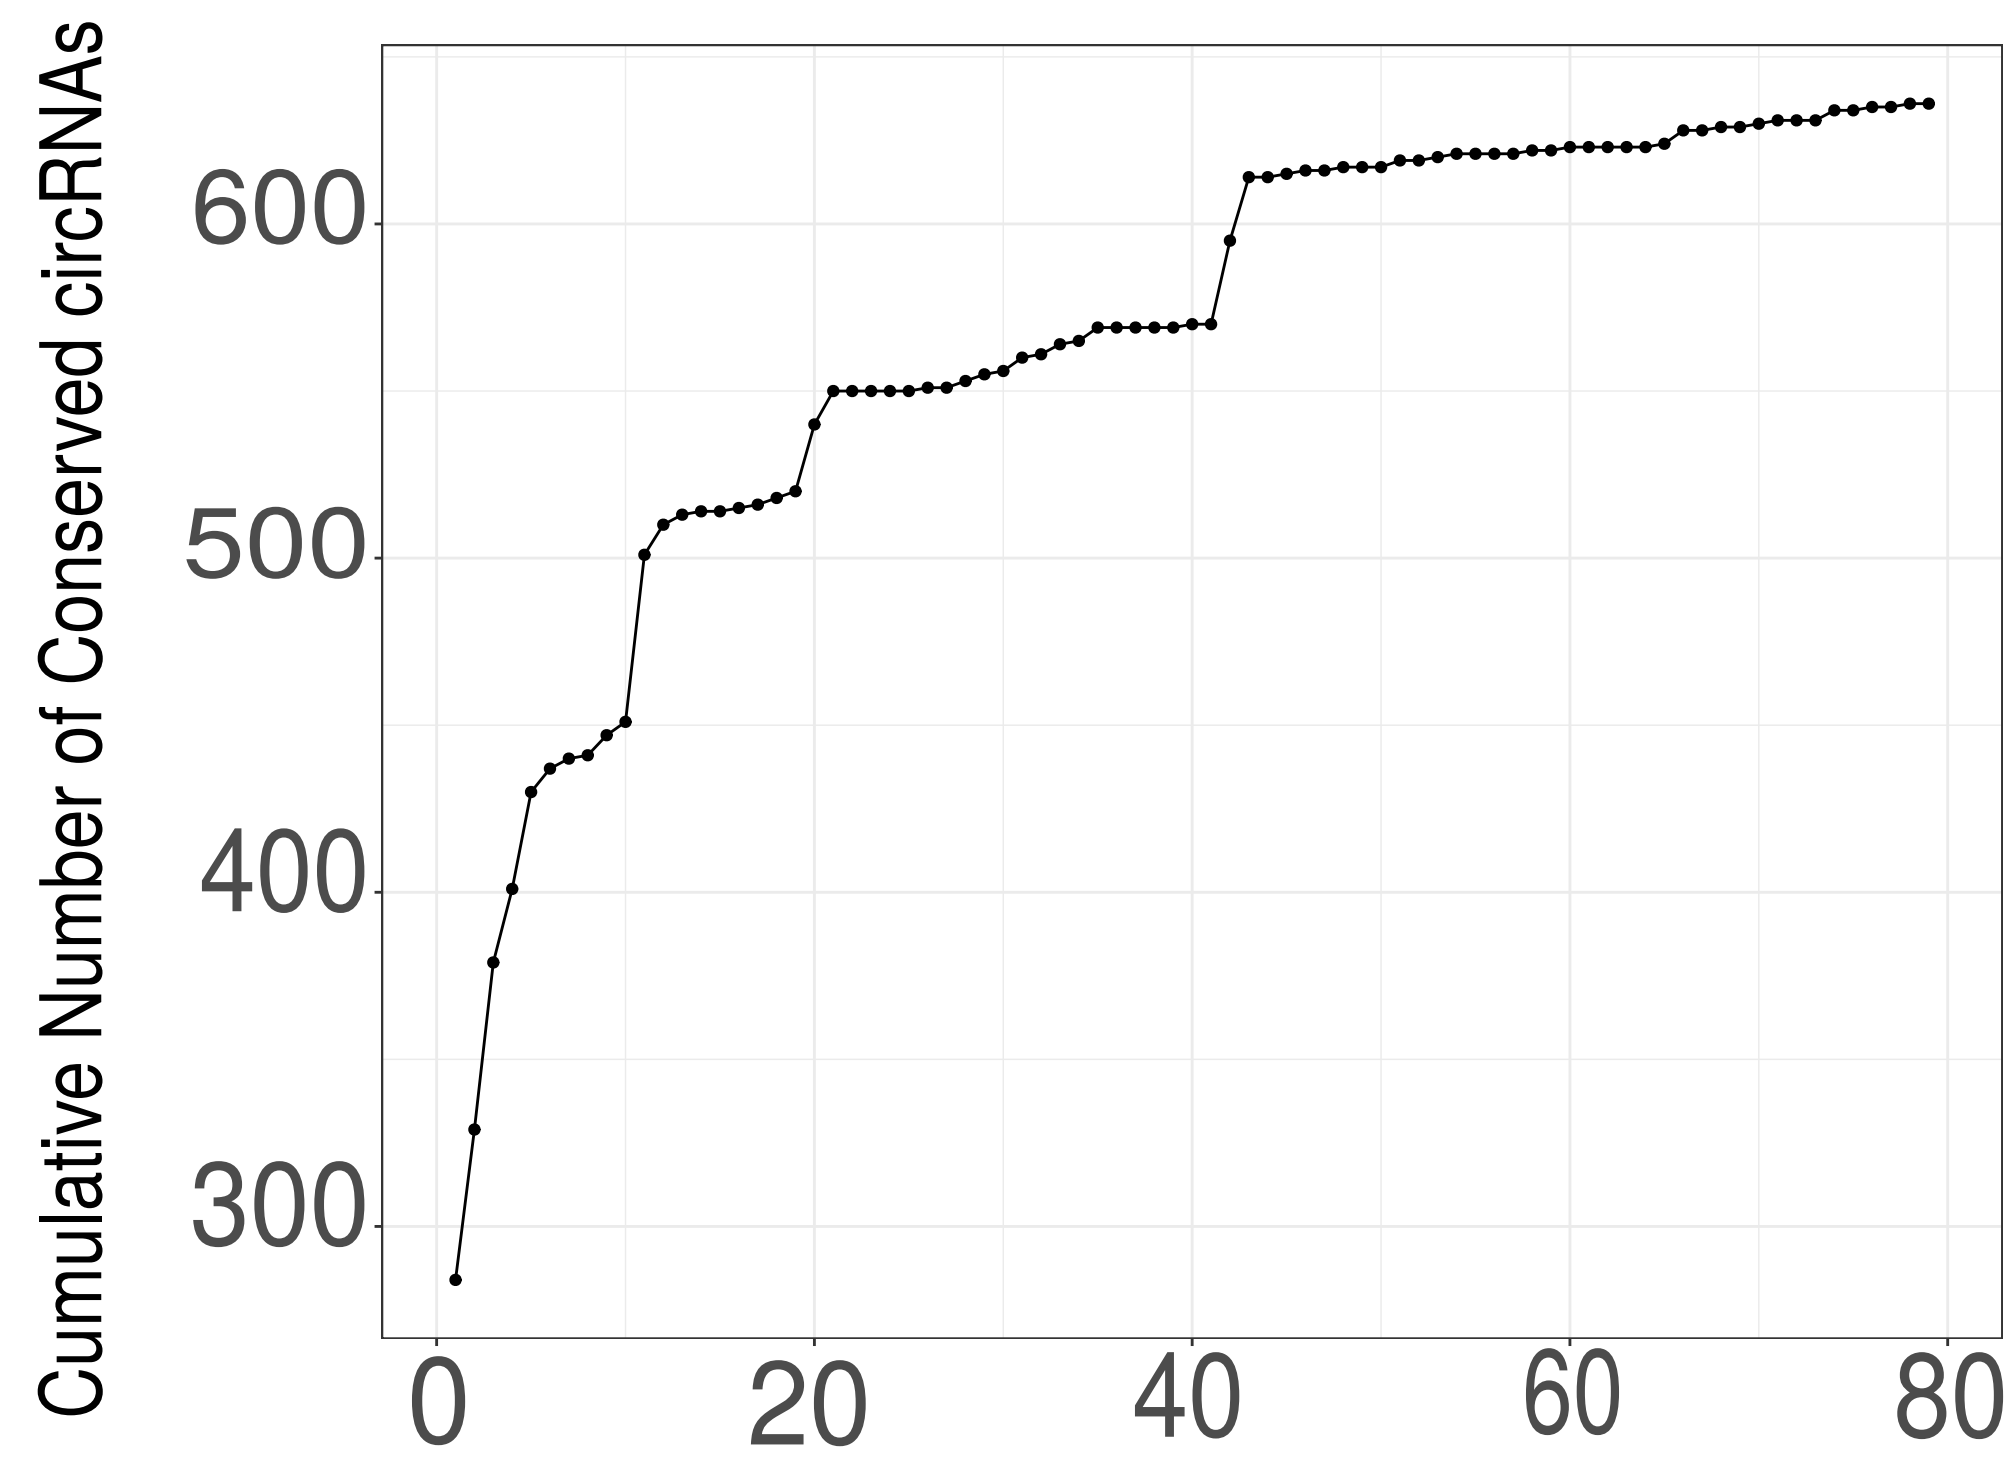

B)

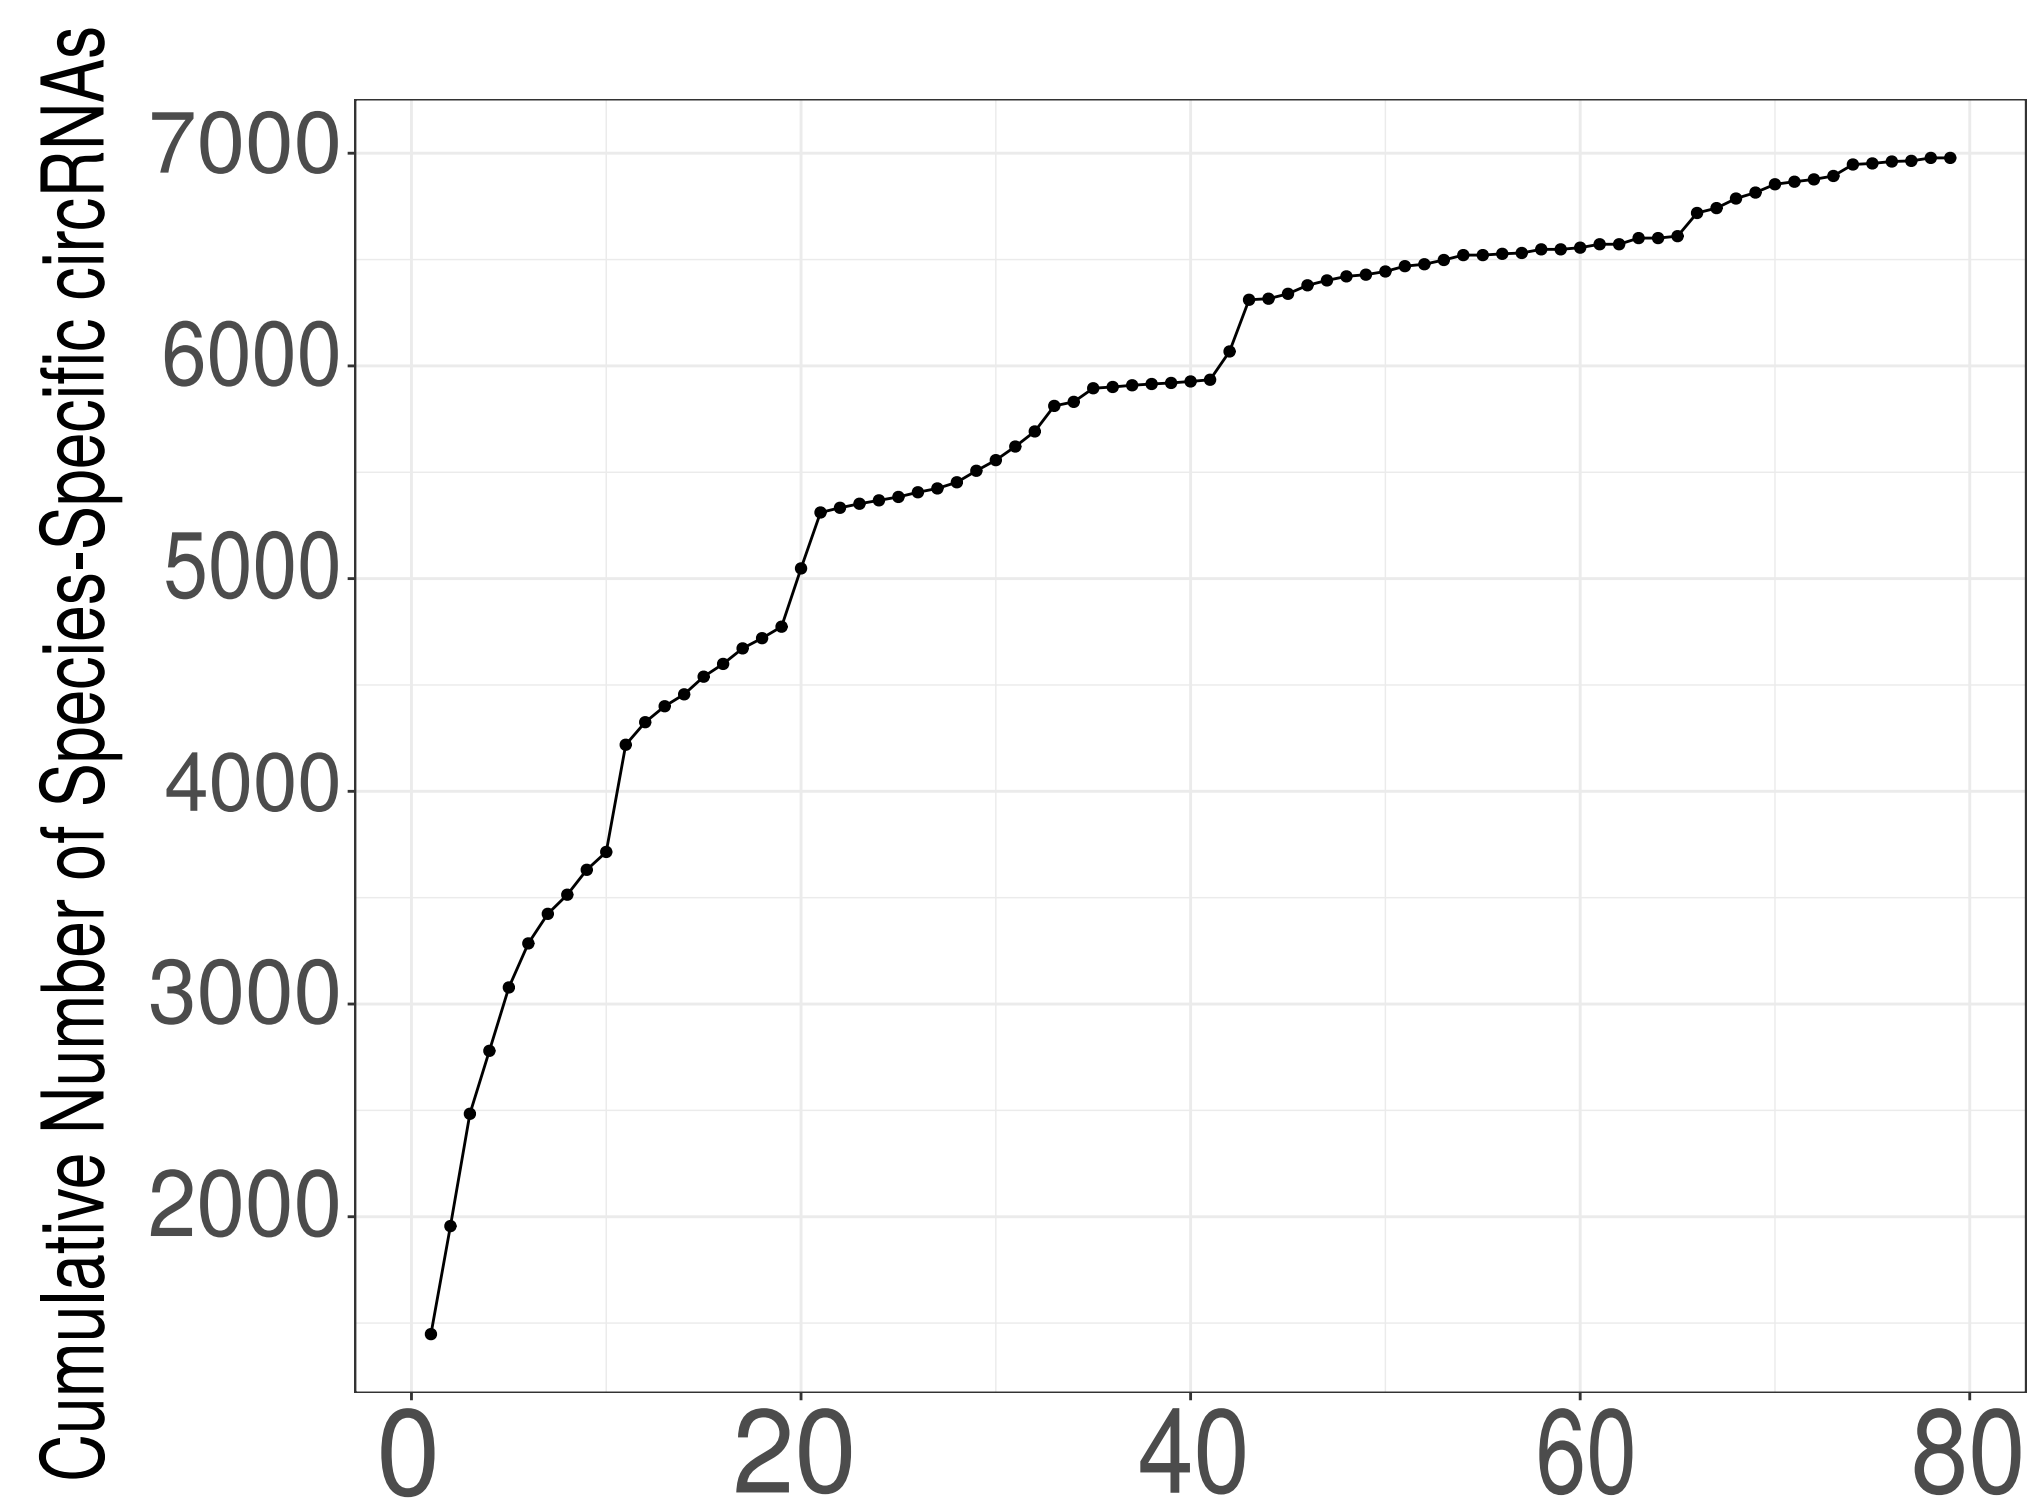

C)

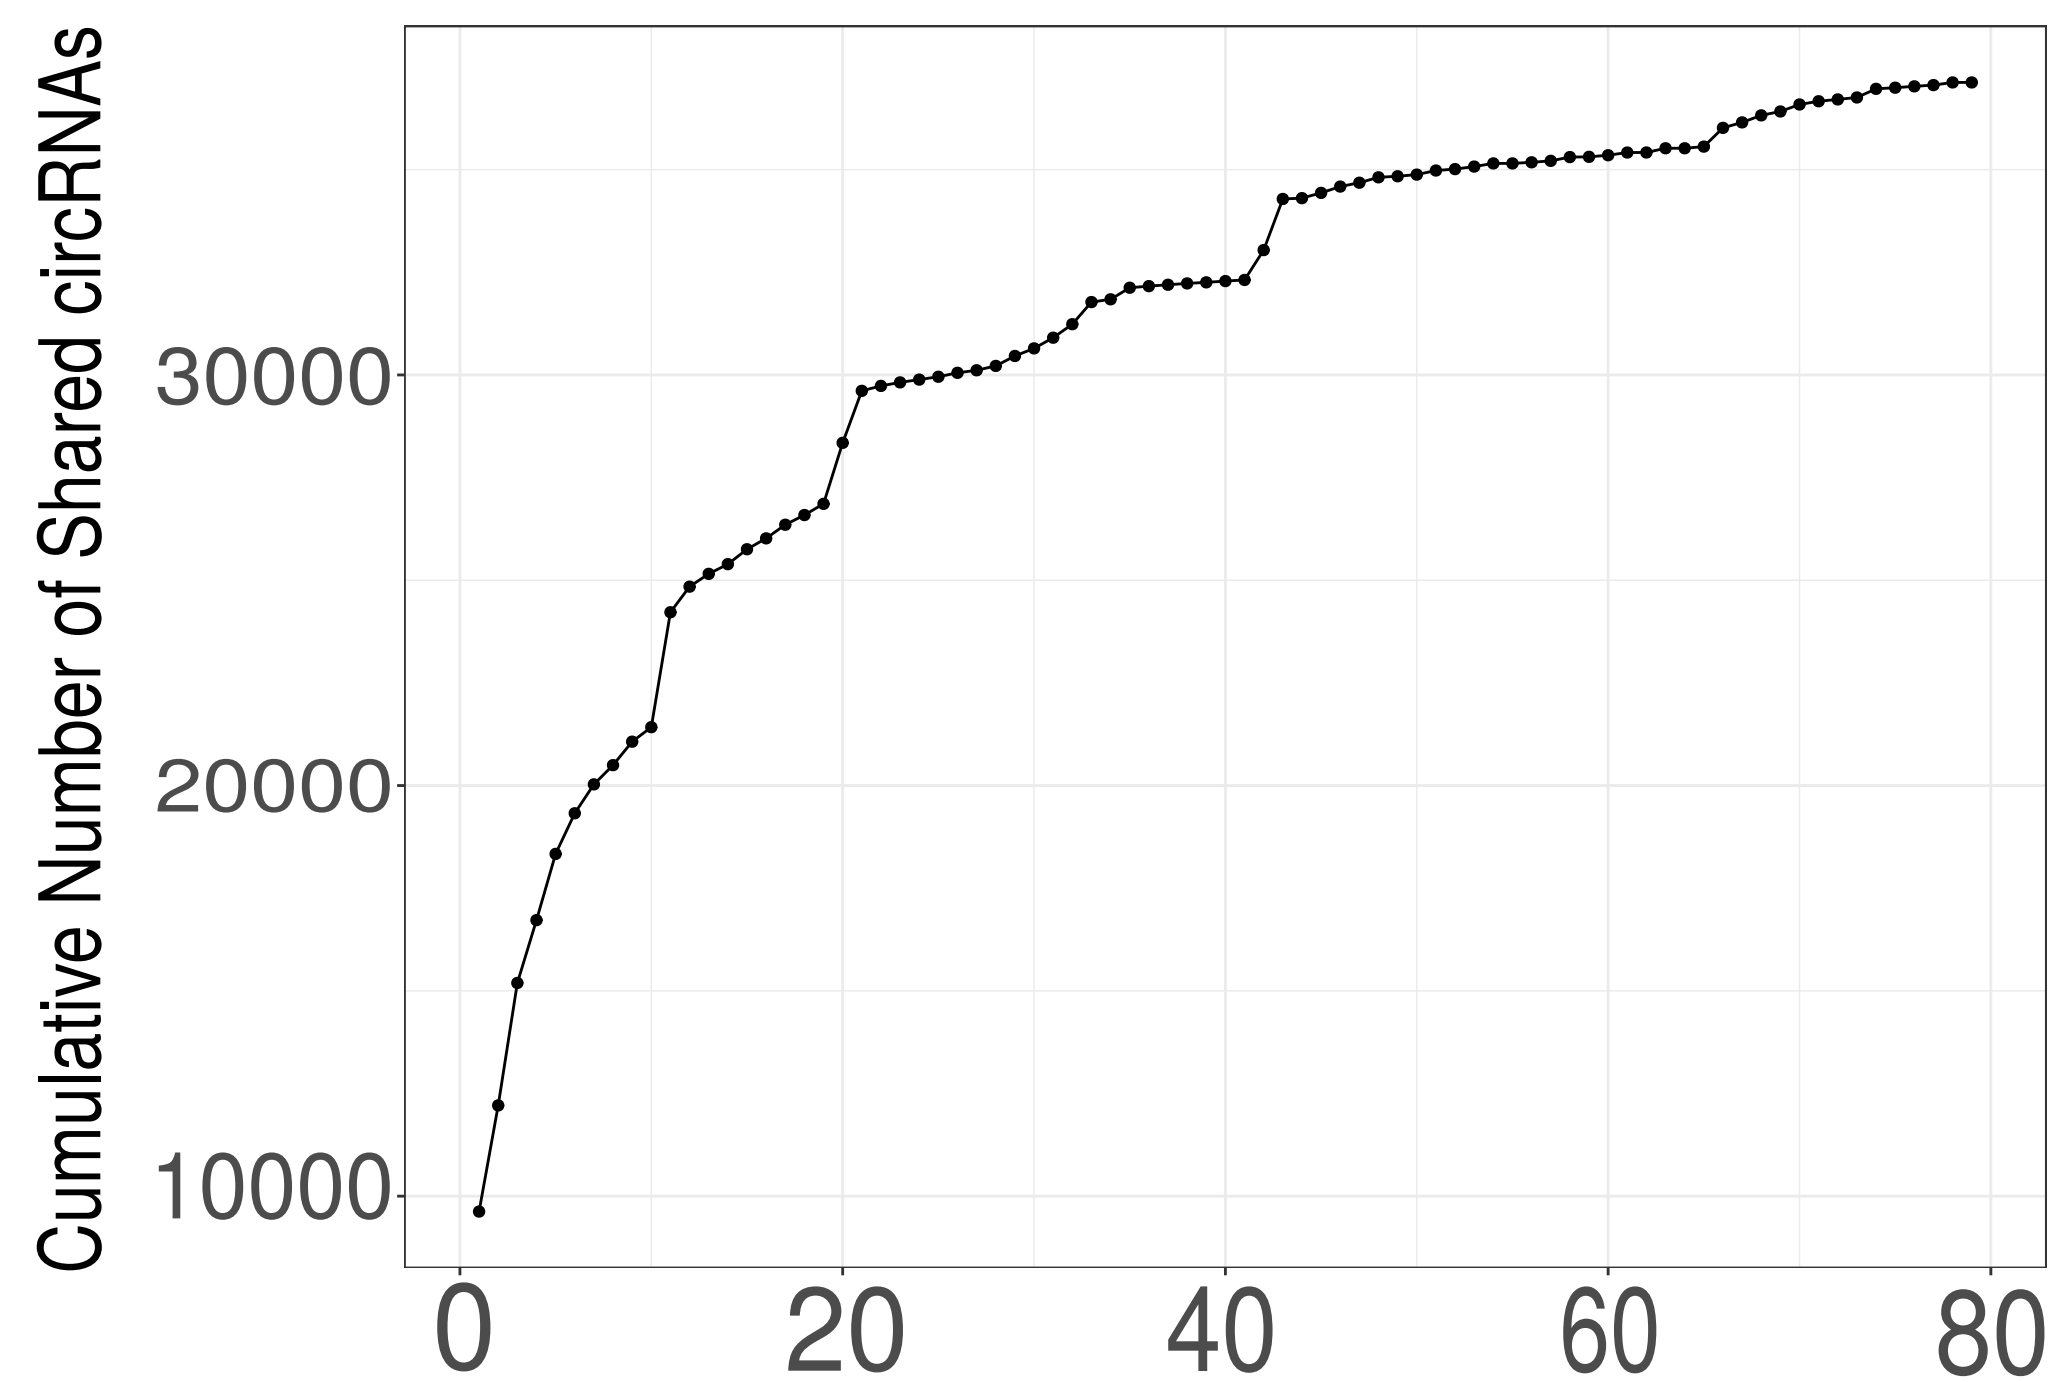

D)

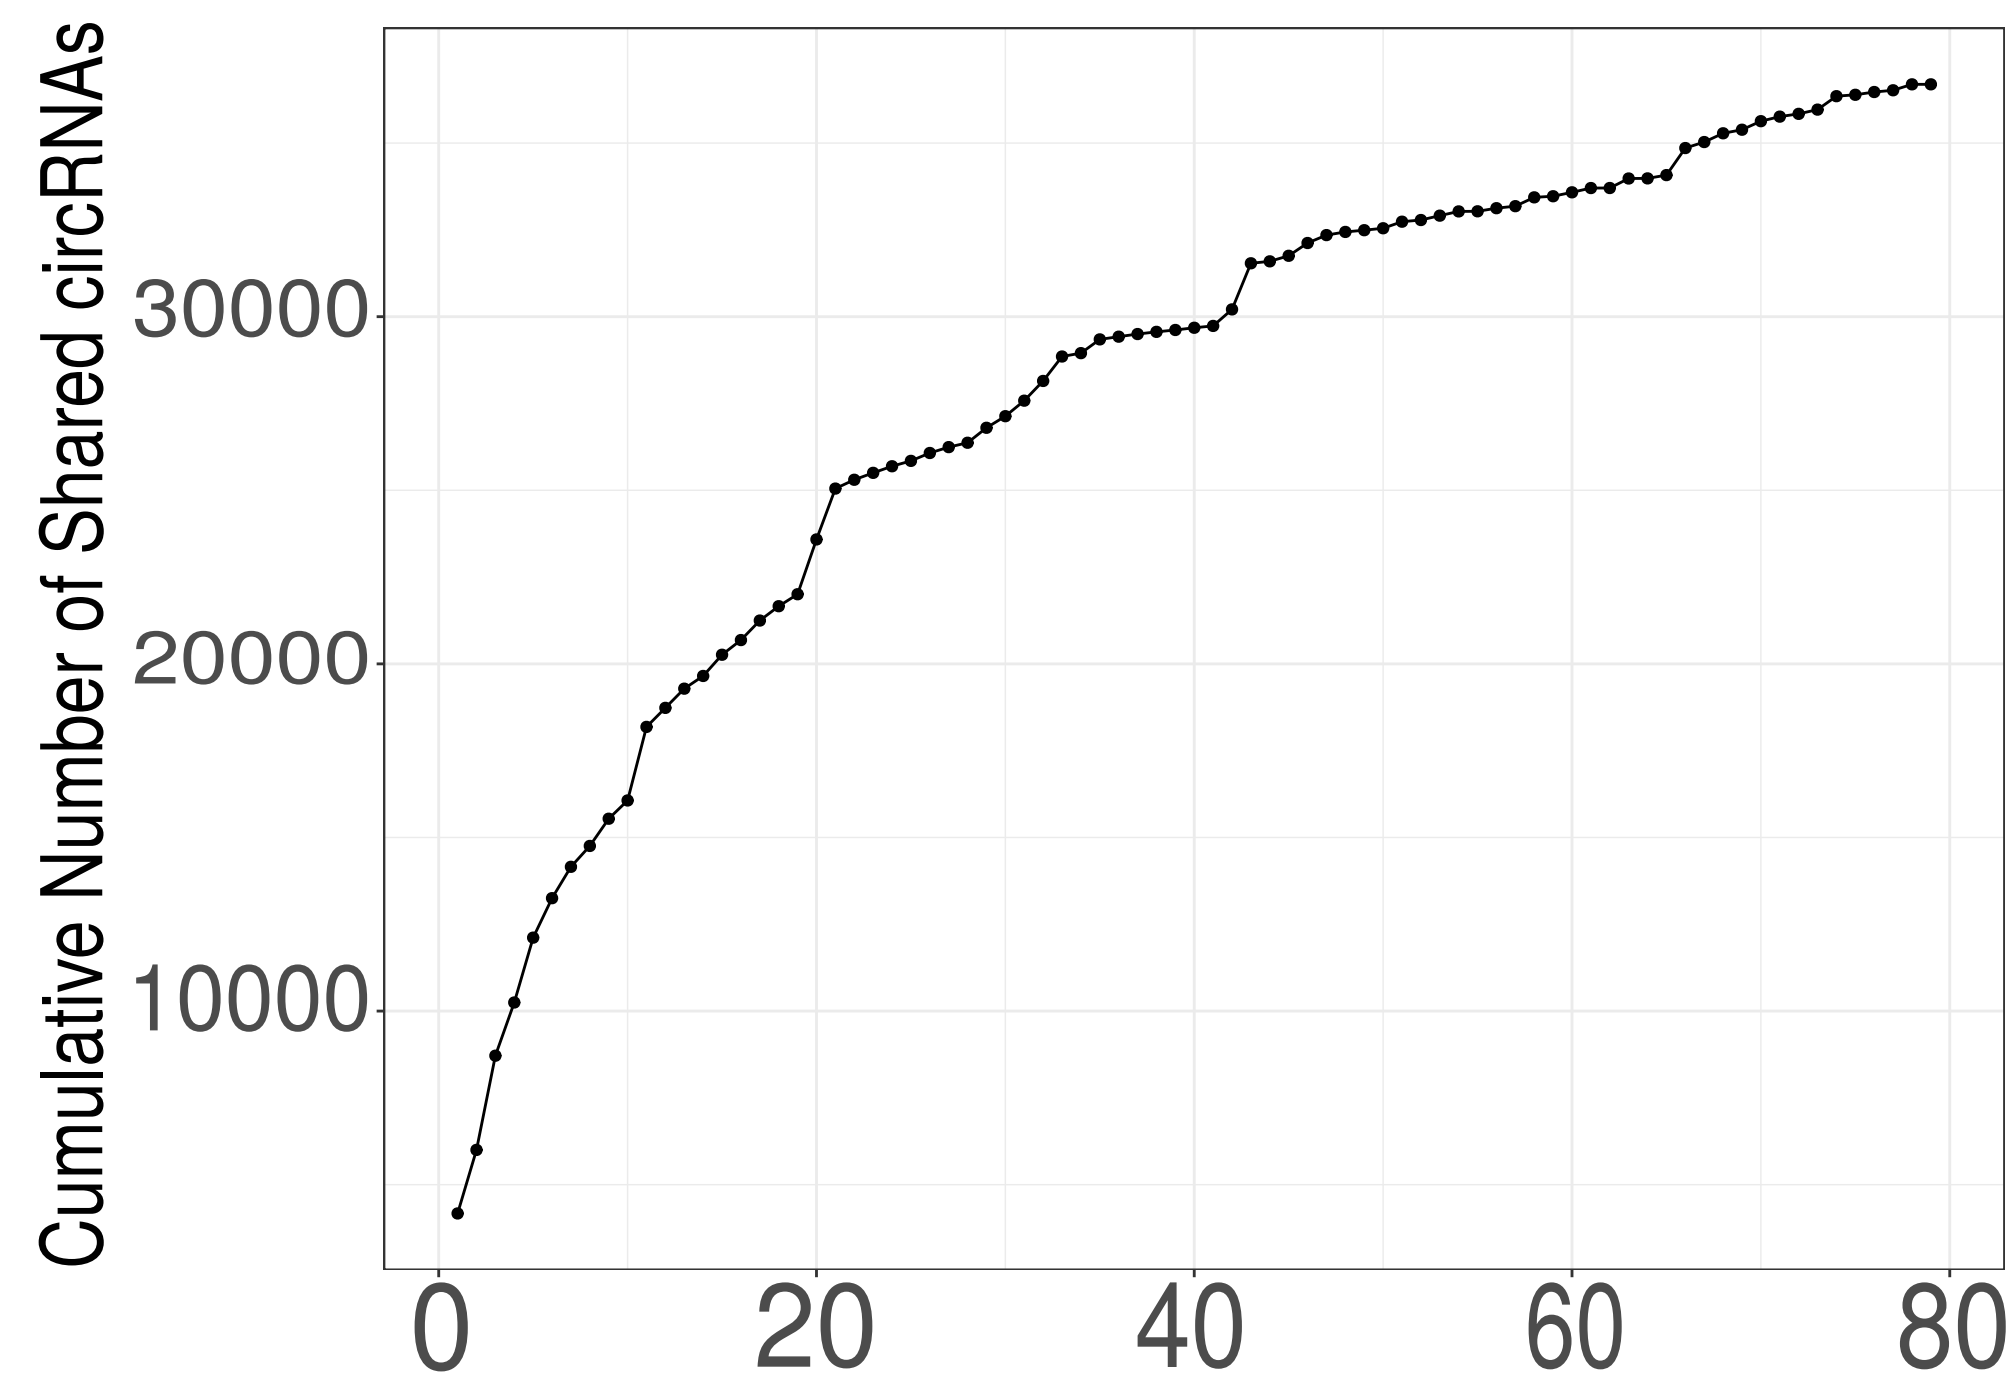

E)

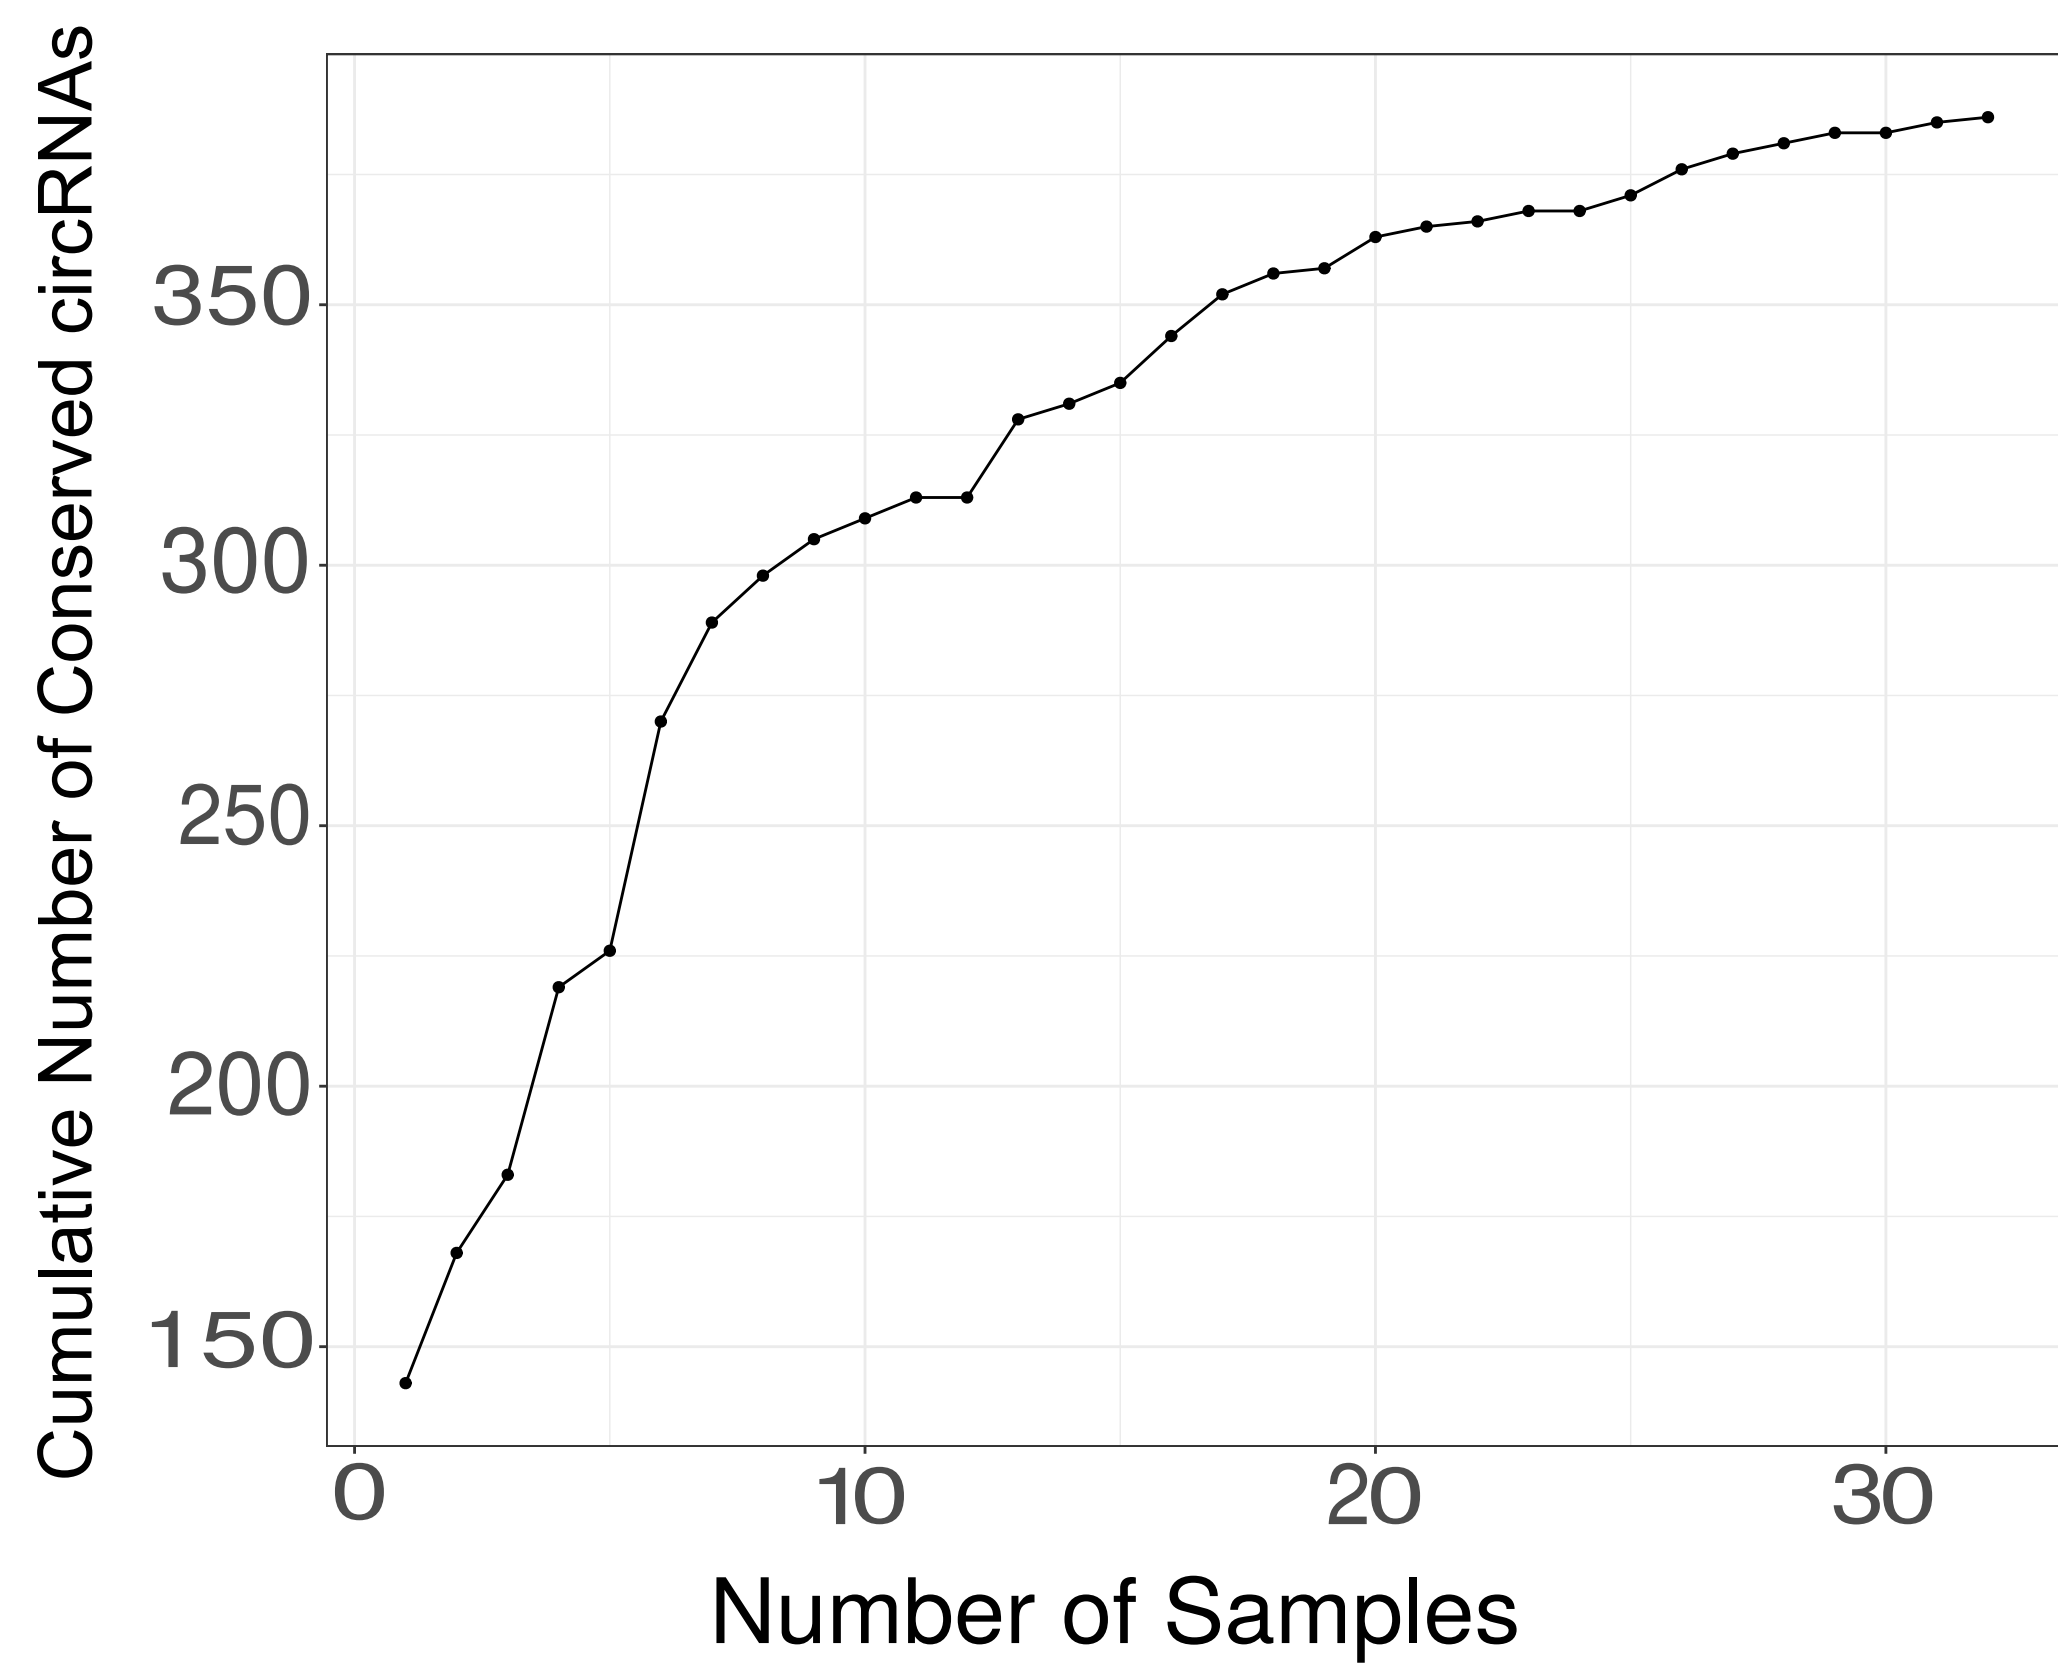

F)

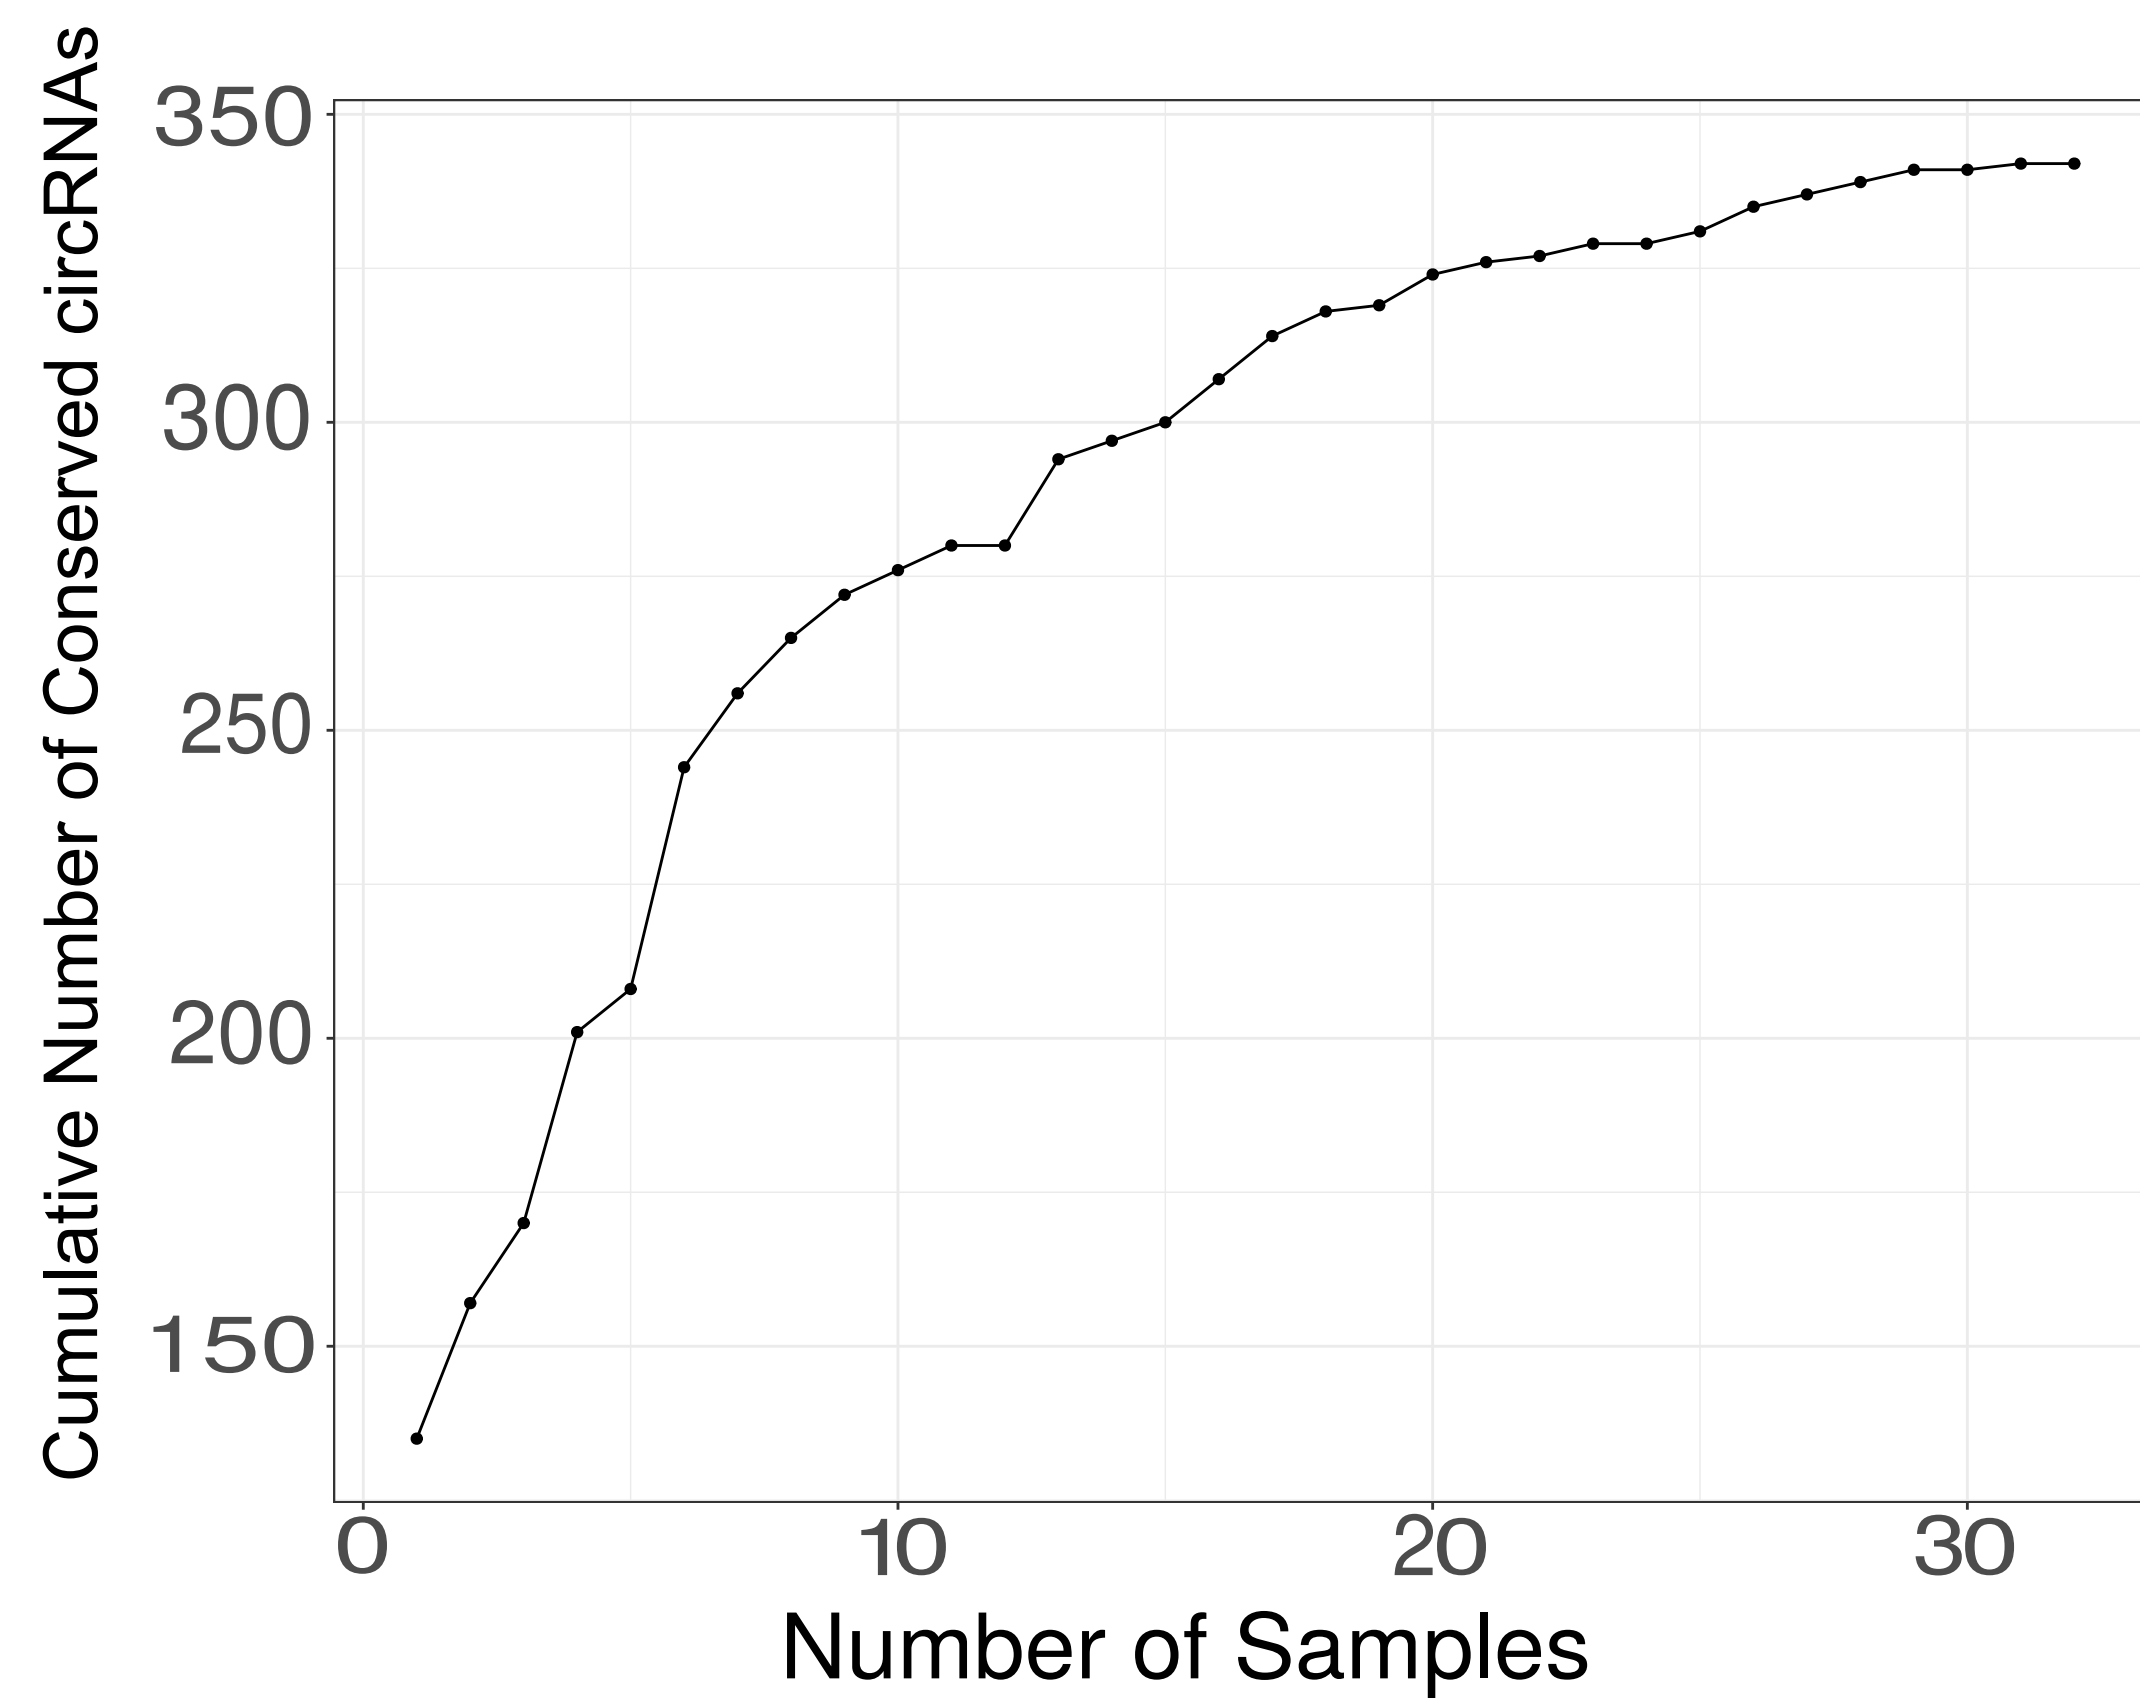

Supplement: supp [file elife-69148-supp-v1.zip]

**A)**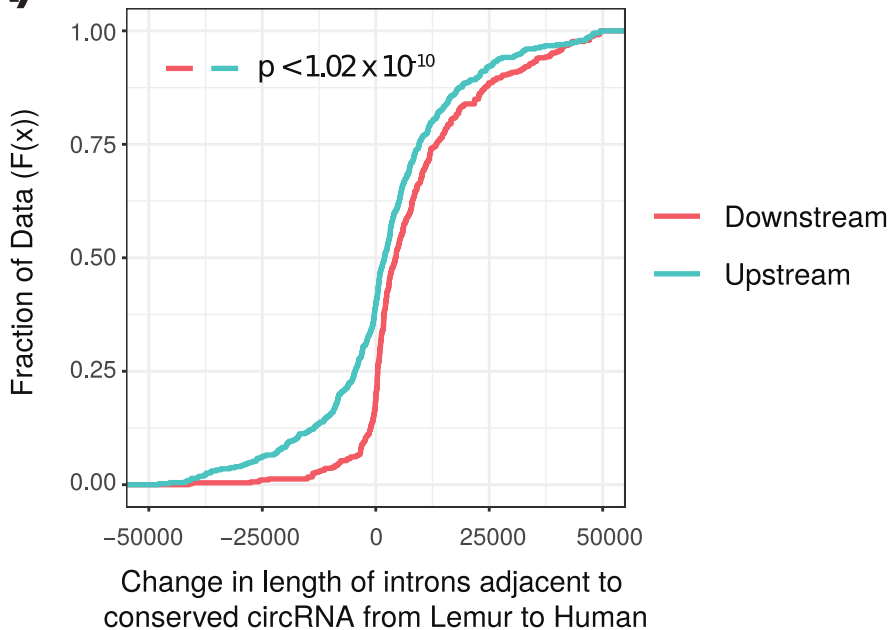

Supplement: supp [file elife-69148-supp-v1.zip]

A)

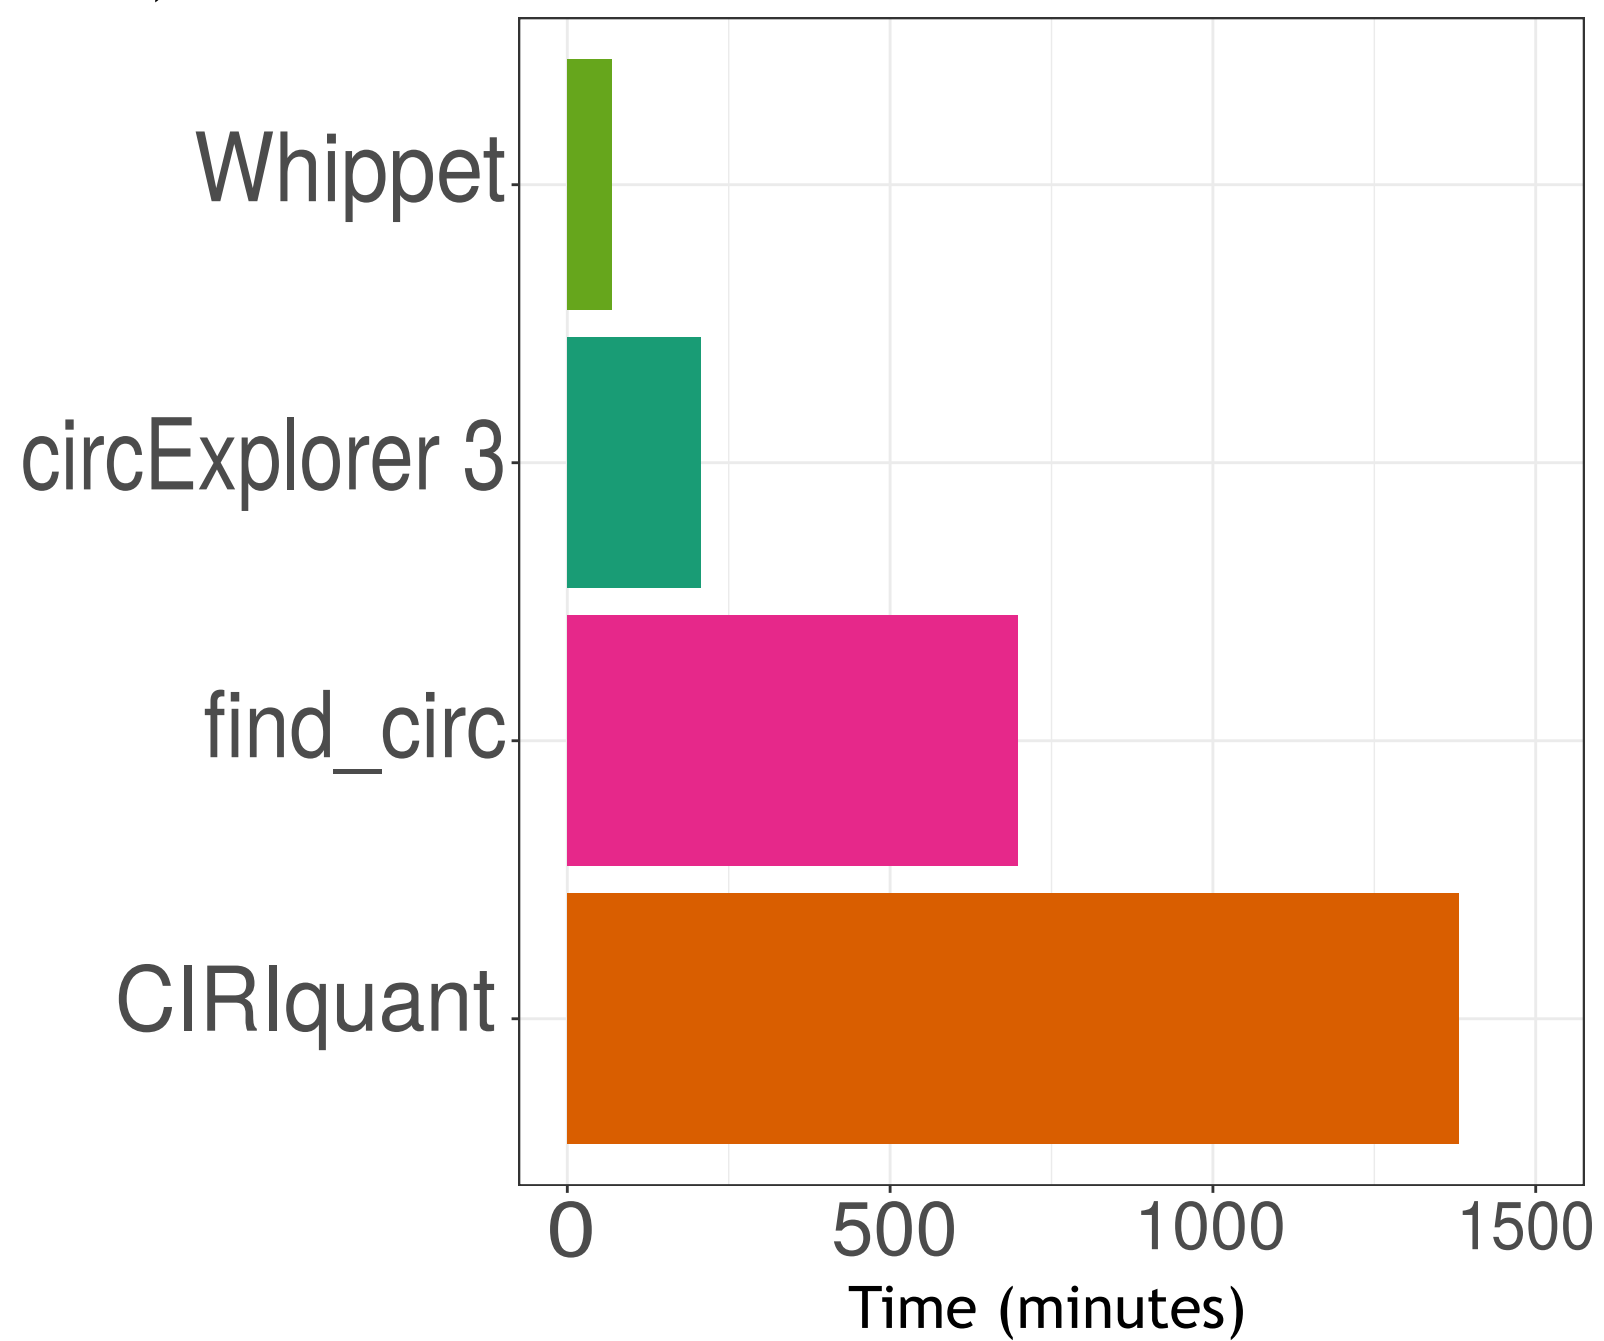

B)

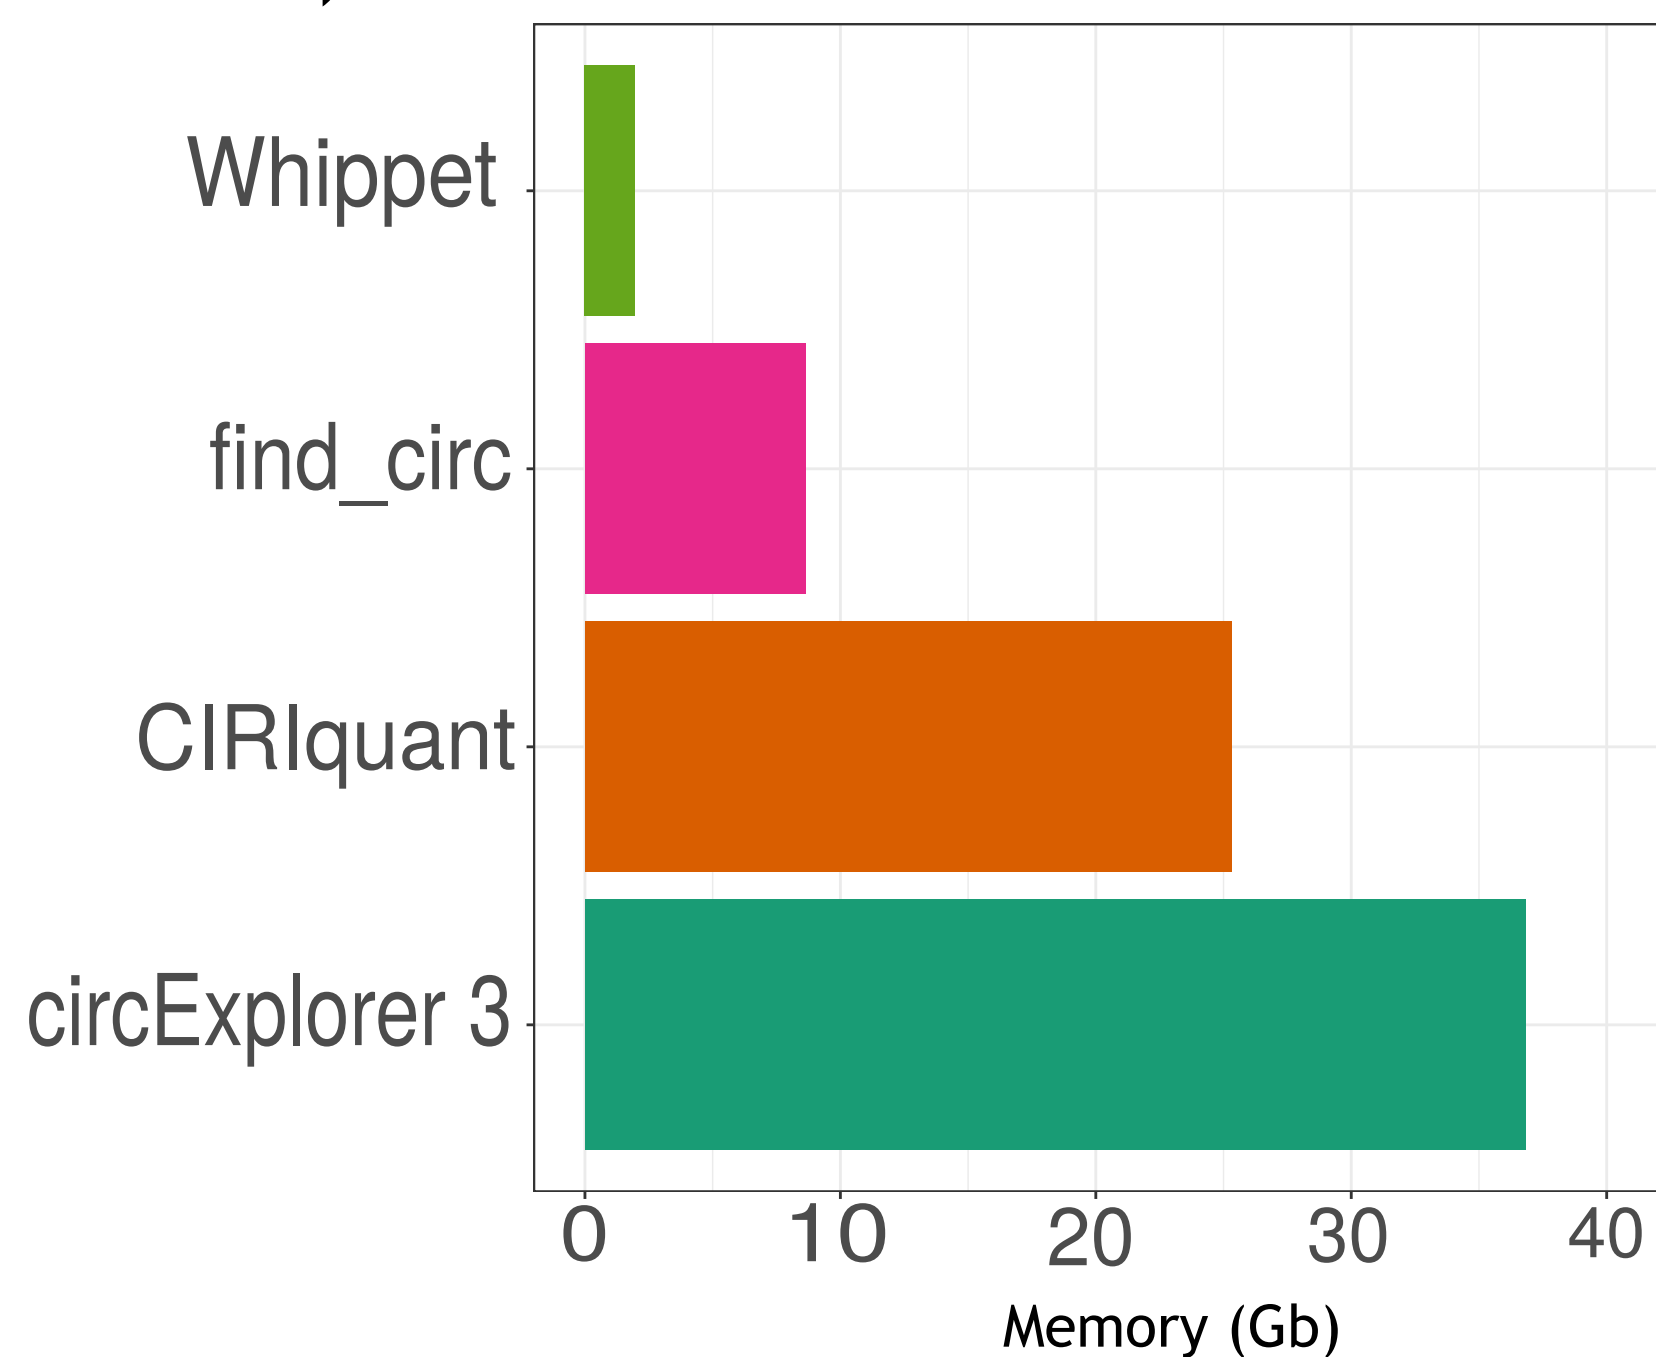

C)

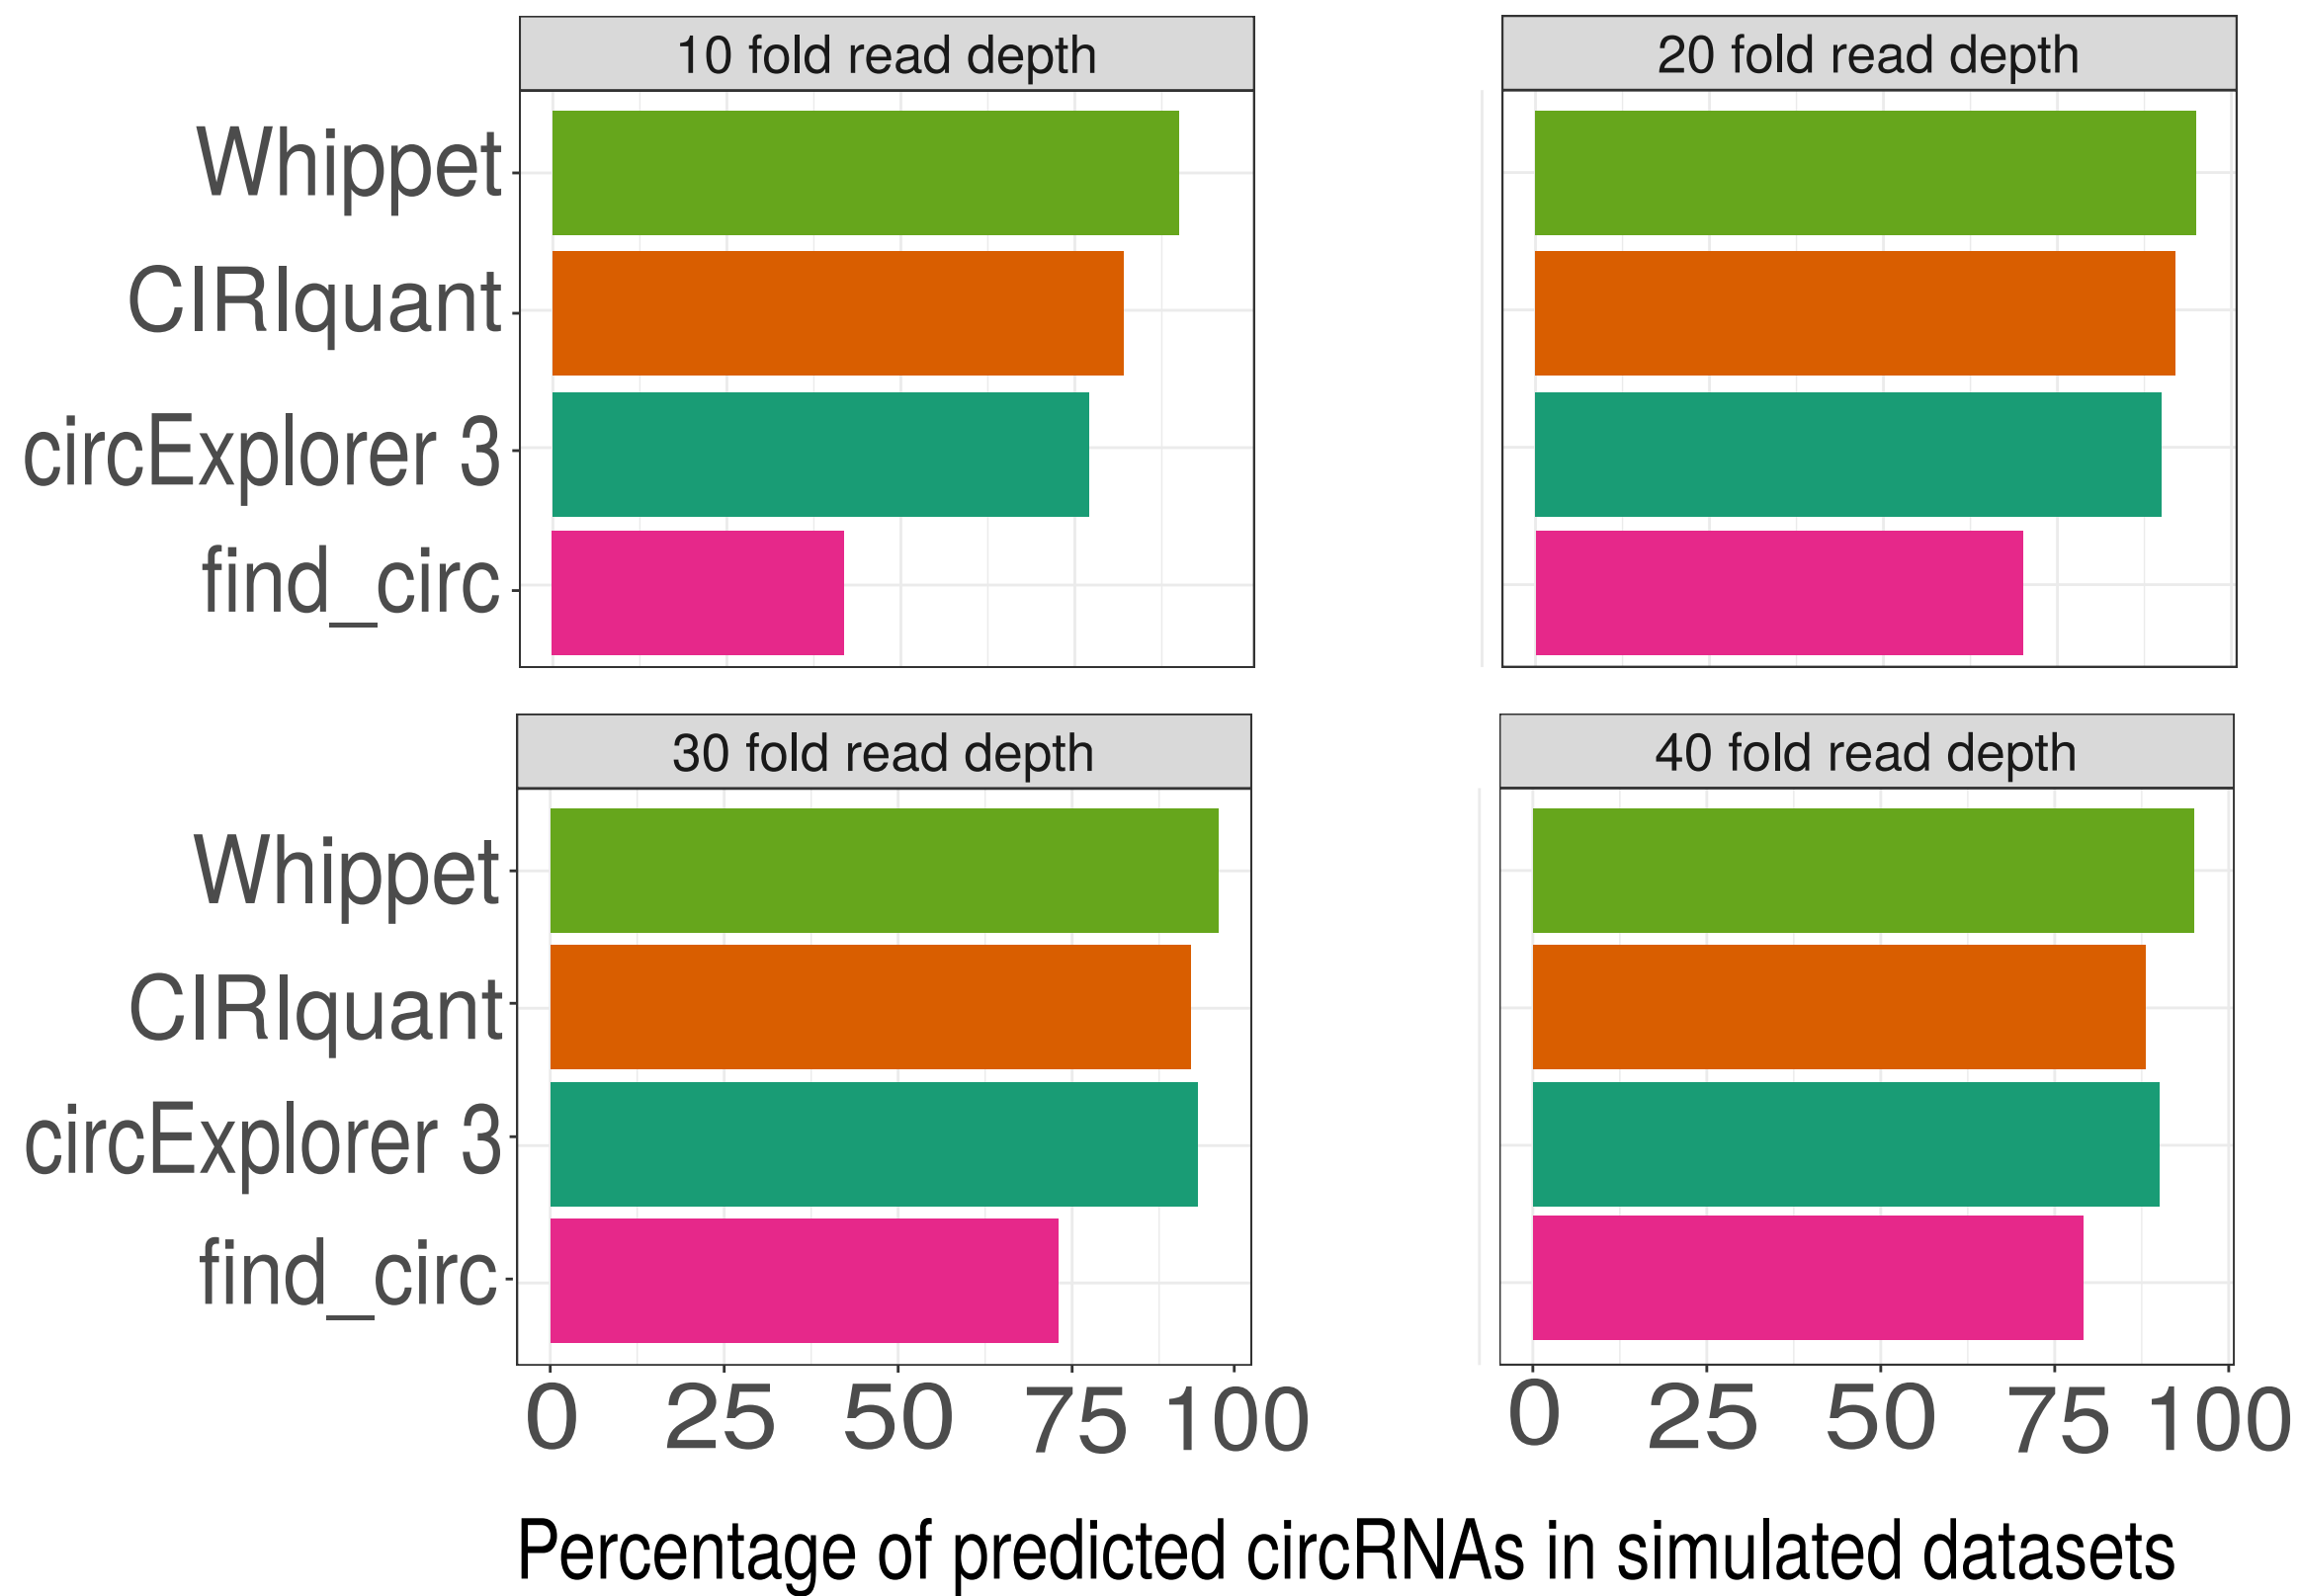

Supplement: supp [file elife-69148-supp-v1.zip]

A)

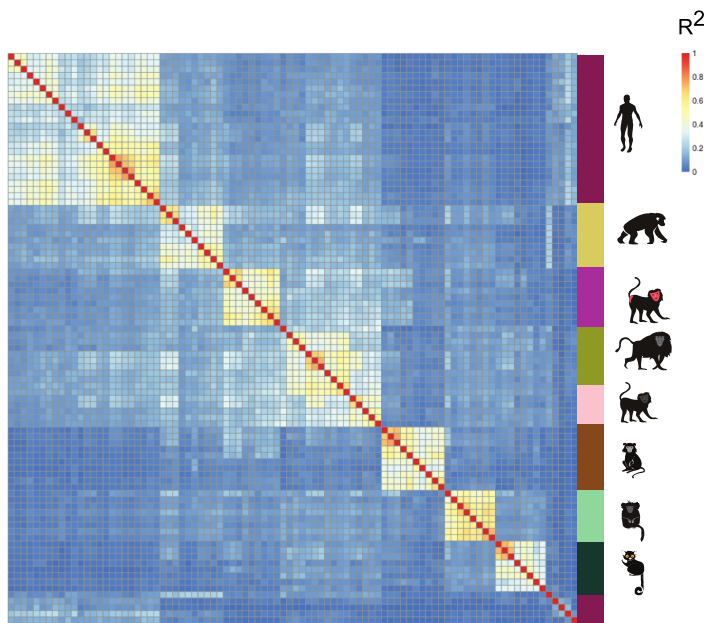

B)

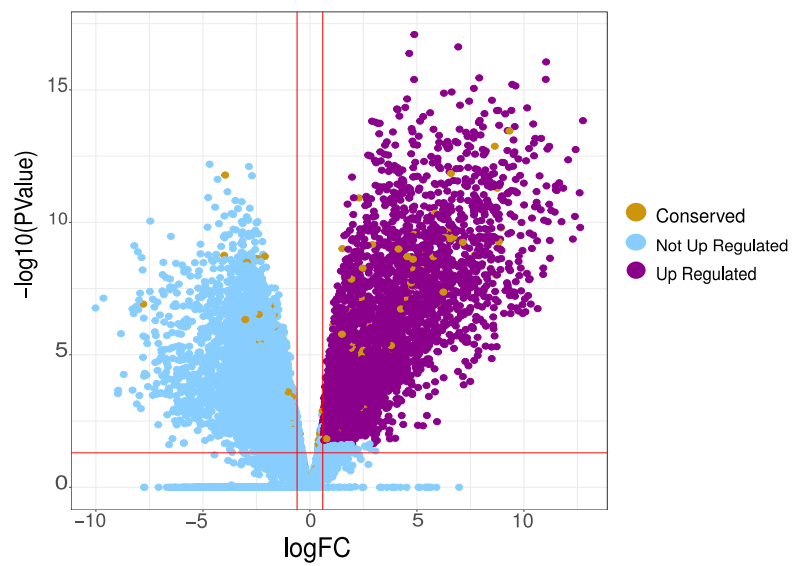

C)

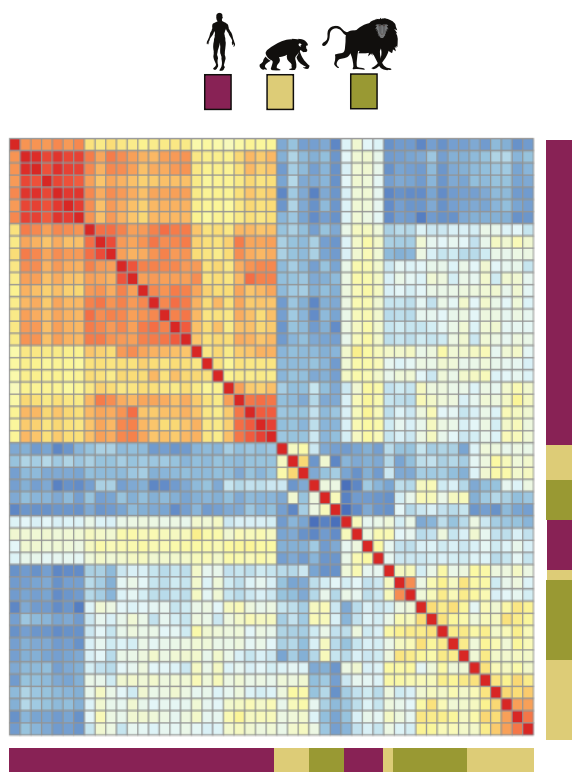

D)

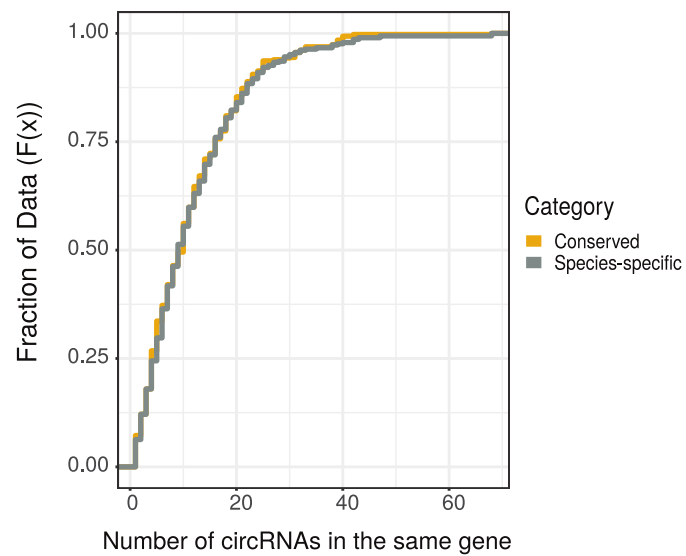

Supplement: supp [file elife-69148-supp-v1.zip]

A)

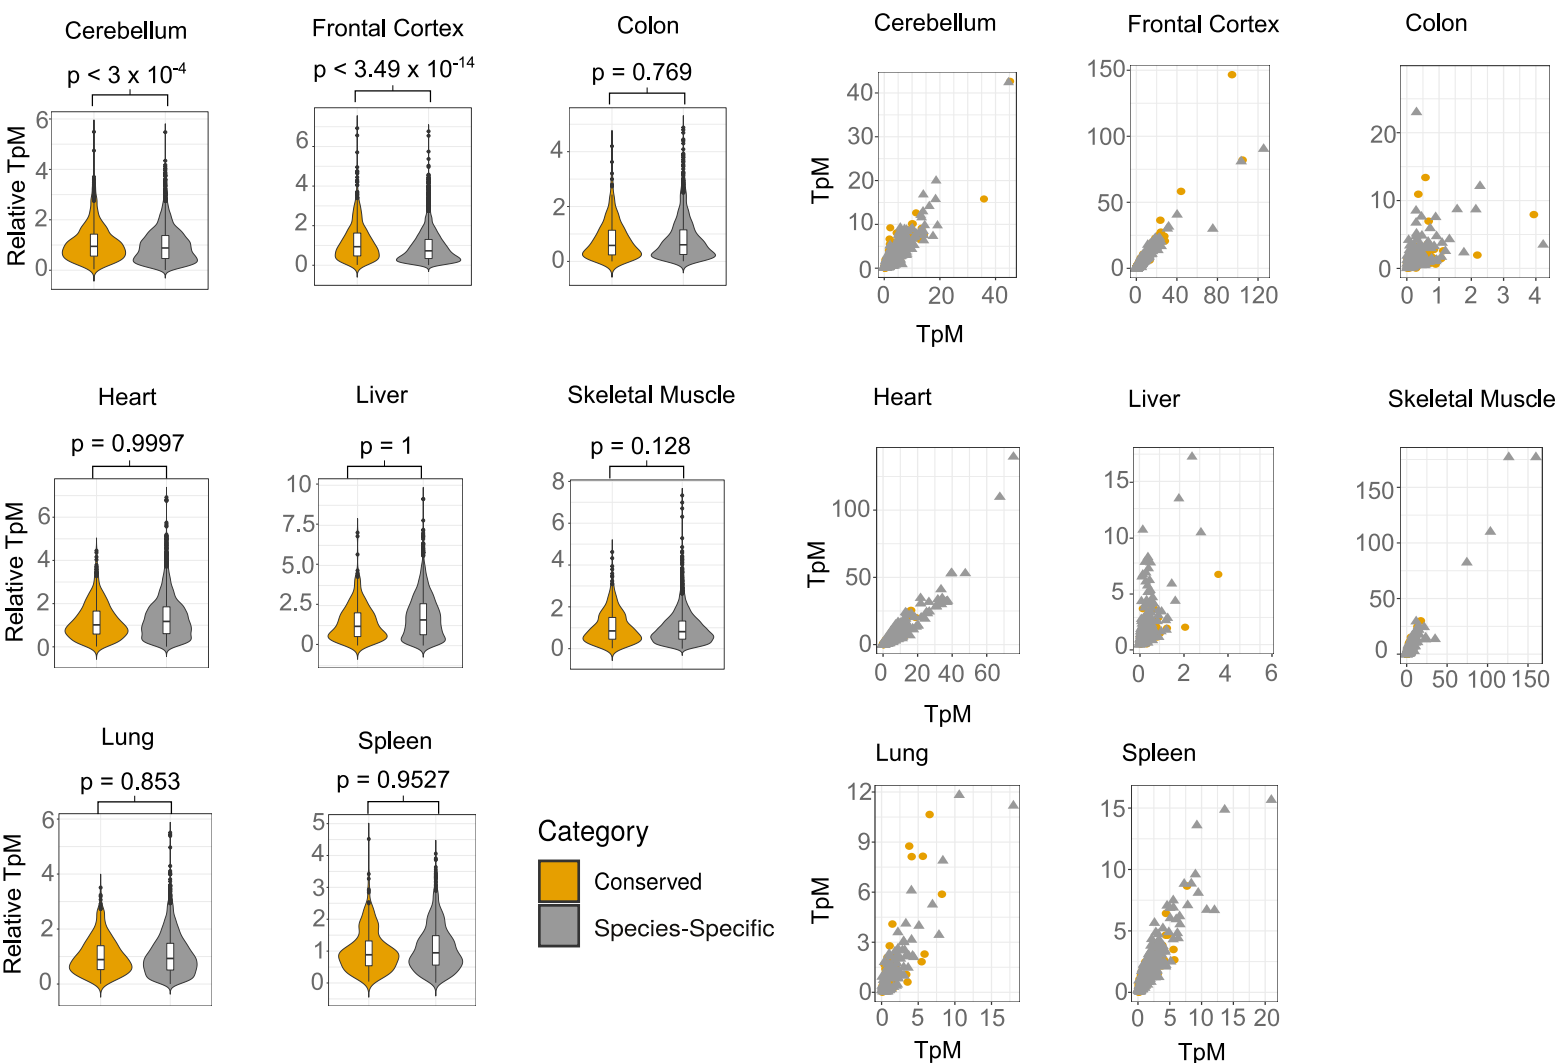

B)

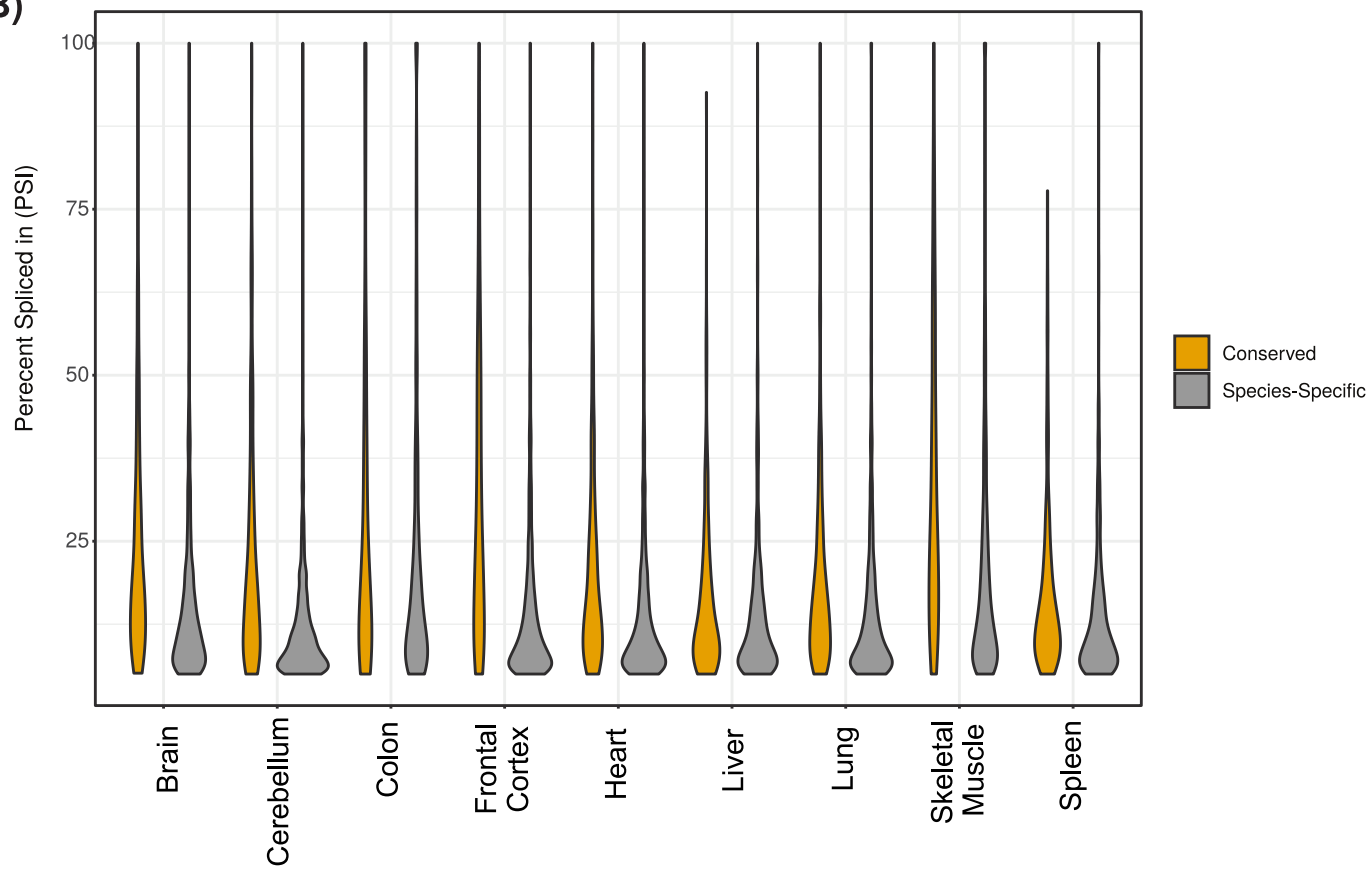

Supplement: supp [file elife-69148-supp-v1.zip]

**Unique Start and End**

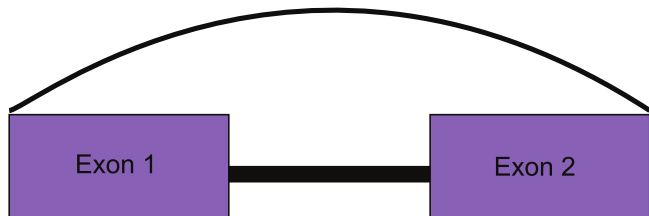

**Repeated Start**

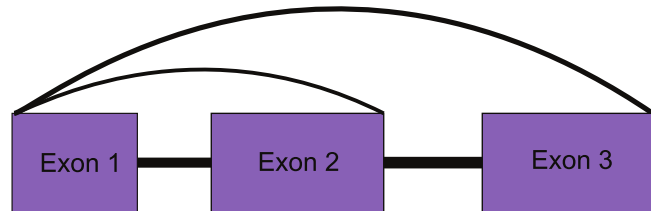

**Repeated Start and End**

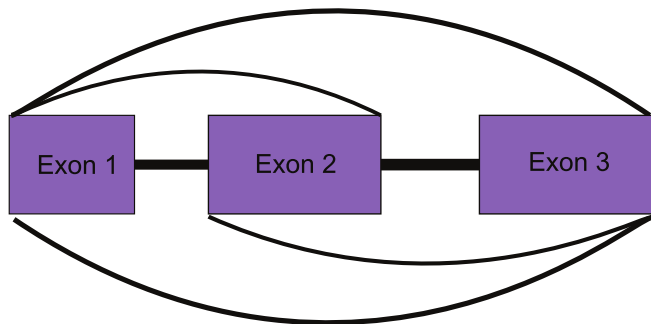

**Repeated End**

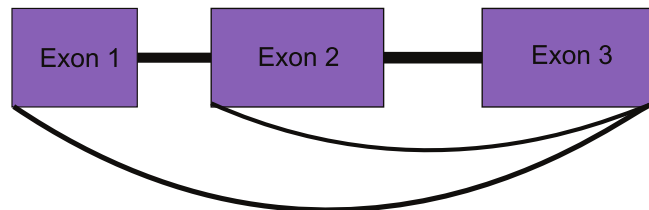

Supplement: supp [file elife-69148-supp-v1.zip]

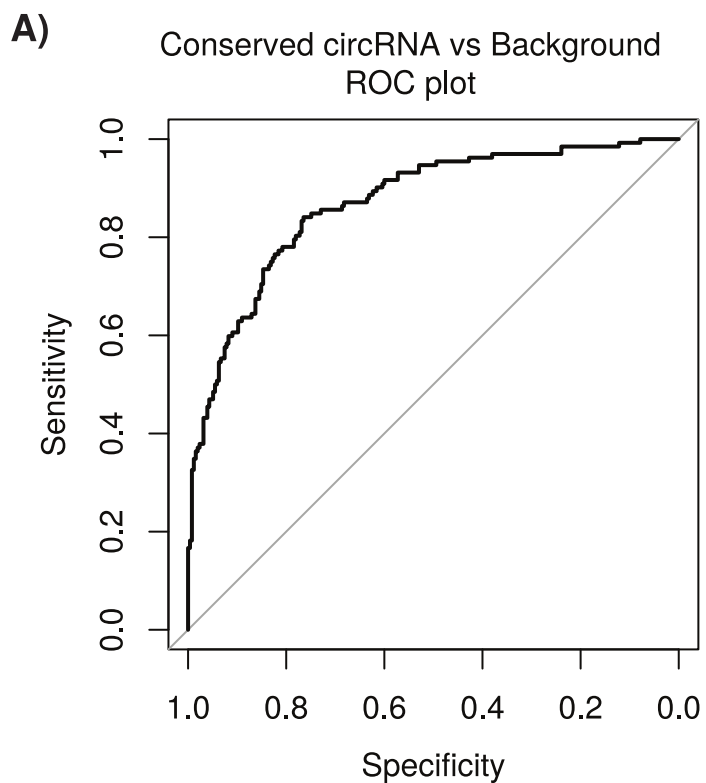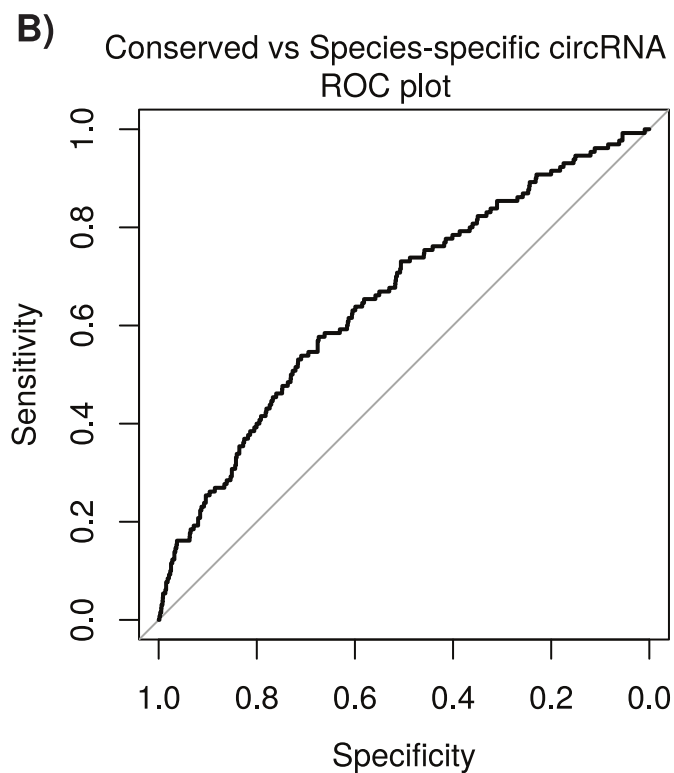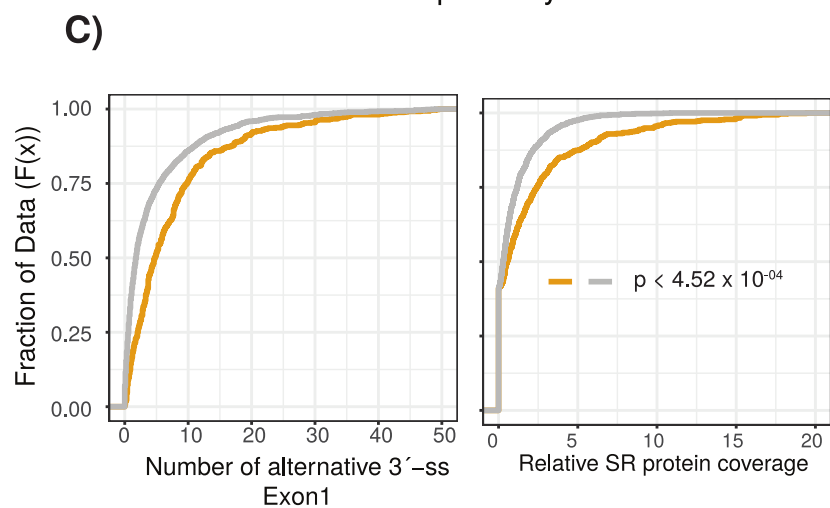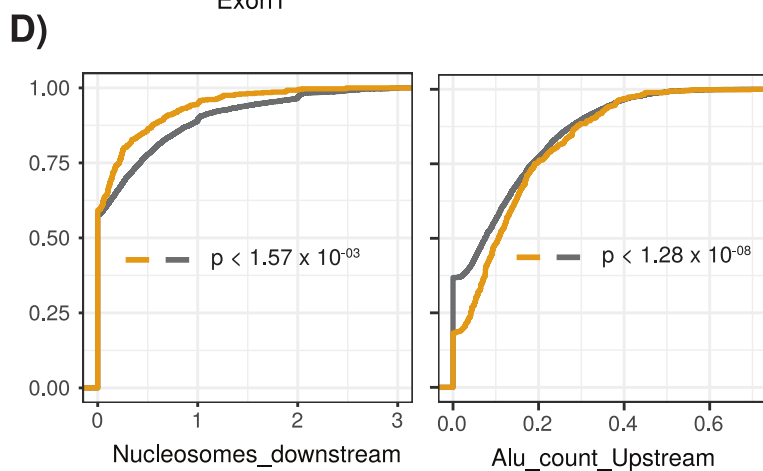

Supplement: supp [file elife-69148-supp-v1.zip]
